# Supplementary material
Source: publisher figshare collection journal article supplement (https://gsajournals.figshare.com/articles/dataset/_/11494371)
Supplement: Supplementary file 1 [file 1]

## Sheet: Supplemental Table 1
Supplemental Table 1 Sequencing data statistics of Floccularia luteovirens
Technology	Illumina
Item	raw data	clean data
Read length (bp)	150	150
Total reads_num (#)	35174928	34240990
Filtered reads_num (#)	933938	-
Depth (×)	174.315	169.687
Total bases_num (#)	5276239200	5136148500
Technology	PacBio
Total bases_num (#)	5204117814
Sequences (#)	2019806
N50 (bp)	2915
G+C (%)	0.4263
Depth (×)	171.932

## Sheet: Supplemental Table 2
Supplemental Table 2 K-mer analysis of Floccularia luteovirens genome
Number	Kmer	Kmer_num	Pkdepth	Genome_size(bp)	Used_base (bp)
1	17	1,784,255,292	58	30,763,022	1,997,300,700
2	17	1,785,837,564	59	30,268,433	1,999,071,900
3	17	1,785,535,126	58	30,785,088	1,998,733,350
4	17	1,785,185,118	58	30,779,053	1,998,341,550

## Sheet: Supplemental Table 3
Supplemental Table 3 Statistics of transposon elements in Floccularia luteovirens
	Repbase TE		TE protiens		De novo		Combined TE
Type	Length(bp)	% in genome	Length(bp)	% in genome	Length(bp)	% in genome	Length(bp)	% in genome
DNA	53554	0.19	36159	0.13	251077	0.87	322494	1.12
LINE	32383	0.11	34204	0.12	0	0	61958	0.22
SINE	1988	0.01	0	0	0	0	1988	0.01
LTR	653162	2.27	821032	2.85	2645138	9.19	2726351	9.47
Unknown	0	0	0	0	503978	1.75	503978	1.75
Total	736564	2.56	891177	3.1	3307493	11.49	3494999	12.14

## Sheet: Supplemental Table 4
Supplemental Table 4 Brief genome comparison between Floccularia luteovirens and other related fungi
Organism name	Family	Type	Bioproject	Size (Mb)	G+C (%)	N50 (Kb)	Gene num (#)
Agaricus bisporus	Agaricaceae	LD	NCBI: PRJNA61005	30.8	46.5	2477	11289
Macrolepiota fuliginosa	Agaricaceae	LD	JGI: 1012285	46.4	——	199	15801
Floccularia luteovirens	Agaricaceae	ECM	NCBI: PRJNA505547	28.8	43.4	571	8333
Lepista nuda	Tricholomataceae	WR	JGI: 1056744	43.5	——	49	14880
Tricholoma matsutake	Tricholomataceae	ECM	JGI: 404726	175.8	34.4	167	22885
Tricholoma terreum	Tricholomataceae	ECM	PRJNA454572	84.4	47.22	30	23810
WR: wood-rotting, ECM:ectomycorrhizal, LD:litter decomposer
*All statistics come from with NCBI and JGI

## Sheet: Supplemental Table 5
Supplemental Table 5 Functional annotation of predicted genes
Gene_ID	Nr	Swissprot	KEGG	KOG	TrEMBL	Interpro	GO
RHS04450	NA	NA	NA	NA	A0A0C3CDY0/5e-15/A0A0C3CDY0_HEBCY Uncharacterized protein OS=Hebeloma cylindrosporum h7 OX=686832 GN=M413DRAFT_64117 PE=4 SV=1	NA	NA
RHS05625	NA	NA	NA	NA	A0A0C9TM58/2e-20/A0A0C9TM58_PAXIN Unplaced genomic scaffold PAXINscaffold_303, whole genome shotgun sequence (Fragment) OS=Paxillus involutus ATCC 200175 OX=664439 GN=PAXINDRAFT_88863 PE=4 SV=1	NA	NA
RHS05322	BAK03773.1/1.94911e-180/predicted protein, partial [Hordeum vulgare subsp. vulgare]	P32568/0.0/SNQ2_YEAST Protein SNQ2 OS=Saccharomyces cerevisiae (strain ATCC 204508 / S288c) OX=559292 GN=SNQ2 PE=1 SV=2	cme:CYME_CMS467C/5e-44/ATP-binding cassette, sub-family G, member 2; K05681 ATP-binding cassette, subfamily G (WHITE), member 2	YDR011w/0.0/[Q] KOG0065 Pleiotropic drug resistance proteins (PDR1-15), ABC superfamily	A0A0C9X5M9/0.0/A0A0C9X5M9_9AGAR Unplaced genomic scaffold K443scaffold_181, whole genome shotgun sequence OS=Laccaria amethystina LaAM-08-1 OX=1095629 GN=K443DRAFT_682209 PE=3 SV=1	PS50893/12.719/ATP-binding cassette, ABC transporter-type domain profile.	NA
RHS05323	XP_009348169.1/9.53815e-49/PREDICTED: fumitremorgin C synthase-like [Pyrus x bretschneideri]	A8NCK6/3e-106/COX2_COPC7 Cytochrome P450 monooxygenase COX2 OS=Coprinopsis cinerea (strain Okayama-7 / 130 / ATCC MYA-4618 / FGSC 9003) OX=240176 GN=COX2 PE=1 SV=1	gab:108478440/3e-38/cytochrome P450 81D11-like; K13260 isoflavone/4'-methoxyisoflavone 2'-hydroxylase [EC:1.14.14.90 1.14.14.89]	At5g67310/7e-40/[Q] KOG0156 Cytochrome P450 CYP2 subfamily	A0A369J858/0.0/A0A369J858_HYPMA O-methylsterigmatocystin oxidoreductase OS=Hypsizygus marmoreus OX=39966 GN=ordA_8 PE=4 SV=1	PR00463/2.5E-26/E-class P450 group I signature	cellular_component:GO:0016021//integral component of membrane;molecular_function:GO:0016705//oxidoreductase activity, acting on paired donors, with incorporation or reduction of molecular oxygen;GO:0020037//heme binding;GO:0005506//iron ion binding;GO:0004497//monooxygenase activity;
RHS05324	BAJ99415.1/0/predicted protein [Hordeum vulgare subsp. vulgare]	A8PDE3/0.0/ACSA_COPC7 Acetyl-coenzyme A synthetase OS=Coprinopsis cinerea (strain Okayama-7 / 130 / ATCC MYA-4618 / FGSC 9003) OX=240176 GN=ACS-1 PE=3 SV=1	cre:CHLREDRAFT_139750/0.0/ACS2; acetyl CoA synthetase; K01895 acetyl-CoA synthetase [EC:6.2.1.1]	YLR153c/0.0/[I] KOG1175 Acyl-CoA synthetase	A0A067S6R1/0.0/A0A067S6R1_GALM3 Acetyl-coenzyme A synthetase OS=Galerina marginata (strain CBS 339.88) OX=685588 GN=GALMADRAFT_106403 PE=3 SV=1	TIGR02188/1.6E-296/Ac_CoA_lig_AcsA: acetate--CoA ligase	biological_process:GO:0019427//acetyl-CoA biosynthetic process from acetate;molecular_function:GO:0003987//acetate-CoA ligase activity;GO:0005524//ATP binding;GO:0016208//AMP binding;
RHS04571	NA	NA	NA	NA	A0A409VN72/2e-38/A0A409VN72_PSICY Uncharacterized protein OS=Psilocybe cyanescens OX=93625 GN=CVT25_009331 PE=4 SV=1	NA	NA
RHS04572	BAK07632.1/8.90576e-142/predicted protein [Hordeum vulgare subsp. vulgare]	O13941/3e-120/YEPB_SCHPO Uncharacterized beta-glucan synthesis-associated protein C23H3.11c OS=Schizosaccharomyces pombe (strain 972 / ATCC 24843) OX=284812 GN=SPAC23H3.11c PE=3 SV=1	apro:F751_2805/2e-53/Beta-glucan synthesis-associated protein SKN1; K21850 beta-glucan synthesis-associated protein KRE6	SPAC23H3.11c/1e-120/[MG] TWOG0133 Beta-glucan synthesis-associated protein	A0A2A9NQ73/0.0/A0A2A9NQ73_9AGAR Glycoside hydrolase family 16 protein OS=Amanita thiersii Skay4041 OX=703135 GN=AMATHDRAFT_48371 PE=4 SV=1	PS51762/13.031/Glycosyl hydrolases family 16 (GH16) domain profile.	biological_process:GO:0005975//carbohydrate metabolic process;cellular_component:GO:0016021//integral component of membrane;molecular_function:GO:0004553//hydrolase activity, hydrolyzing O-glycosyl compounds;
RHS04573	XP_013450331.1/1.27242e-19/hypothetical protein MTR_7g107650 [Medicago truncatula] &gt;KEH24359.1 hypothetical protein MTR_7g107650 [Medicago truncatula]	Q10337/1e-38/BRC1_SCHPO BRCT-containing protein 1 OS=Schizosaccharomyces pombe (strain 972 / ATCC 24843) OX=284812 GN=brc1 PE=1 SV=1	mtr:MTR_2g020440/3e-18/BRCT domain DNA repair protein; K20780 mediator of DNA damage checkpoint protein 1	SPBC582.05c/6e-39/[KTDL] KOG2043 Signaling protein SWIFT and related BRCT domain proteins	F8Q1V2/0.0/F8Q1V2_SERL3 Uncharacterized protein OS=Serpula lacrymans var. lacrymans (strain S7.3) OX=936435 GN=SERLA73DRAFT_161344 PE=4 SV=1	PS50172/11.337/BRCT domain profile.	NA
RHS04574	NA	NA	NA	NA	A0A0L6WQK6/6e-10/A0A0L6WQK6_9AGAR Uncharacterized protein OS=Termitomyces sp. J132 OX=1306850 GN=J132_04153 PE=4 SV=1	NA	NA
RHS04575	XP_008875086.1/5.0062e-09/hypothetical protein H310_10464 [Aphanomyces invadans] &gt;XP_008875087.1 hypothetical protein, variant 1 [Aphanomyces invadans] &gt;ETV96294.1 hypothetical protein H310_10464 [Aphanomyces invadans] &gt;ETV96295.1 hypothetical protein, variant 1 [Aphanomyces invadans]	NA	NA	NA	A0A167VRZ8/2e-76/A0A167VRZ8_9AGAM Phox-like protein OS=Fibularhizoctonia sp. CBS 109695 OX=436010 GN=FIBSPDRAFT_805885 PE=4 SV=1	PF00787/5.4E-13/PX domain	molecular_function:GO:0035091//phosphatidylinositol binding;
RHS04576	XP_014526746.1/2.69506e-15/short-chain dehydrogenase [Blastocystis sp. subtype 4] &gt;KNB43303.1 short-chain dehydrogenase [Blastocystis sp. subtype 4]	Q9Y140/2e-13/DHRS7_DROME Dehydrogenase/reductase SDR family protein 7-like OS=Drosophila melanogaster OX=7227 GN=CG7601 PE=2 SV=1	han:110879937/4e-11/11-beta-hydroxysteroid dehydrogenase 1B-like; K22418 11beta/17beta-hydroxysteroid dehydrogenase [EC:1.1.1.146 1.1.1.-]	At1g63380/1e-08/[R] KOG0725 Reductases with broad range of substrate specificities	A8NPW3/2e-141/A8NPW3_COPC7 Uncharacterized protein OS=Coprinopsis cinerea (strain Okayama-7 / 130 / ATCC MYA-4618 / FGSC 9003) OX=240176 GN=CC1G_05380 PE=4 SV=2	PR00081/4.2E-12/Glucose/ribitol dehydrogenase family signature	cellular_component:GO:0016021//integral component of membrane;molecular_function:GO:0016491//oxidoreductase activity;
RHS04577	XP_005708671.1/1.83798e-75/bifunctional glutamate N-acetyltransferase / amino-acid N-acetyltransferase [Galdieria sulphuraria] &gt;EME32151.1 bifunctional glutamate N-acetyltransferase / amino-acid N-acetyltransferase [Galdieria sulphuraria]	A8NAN2/0.0/ARGJ_COPC7 Arginine biosynthesis bifunctional protein ArgJ, mitochondrial OS=Coprinopsis cinerea (strain Okayama-7 / 130 / ATCC MYA-4618 / FGSC 9003) OX=240176 GN=CC1G_08401 PE=3 SV=1	gsl:Gasu_05650/3e-76/bifunctional glutamate N-acetyltransferase / amino-acid N-acetyltransferase; K00620 glutamate N-acetyltransferase / amino-acid N-acetyltransferase [EC:2.3.1.35 2.3.1.1]	SPBC1271.14/8e-138/[E] KOG2786 Putative glutamate/ornithine acetyltransferase	A0A409W017/0.0/A0A409W017_PSICY Arginine biosynthesis bifunctional protein ArgJ, mitochondrial OS=Psilocybe cyanescens OX=93625 GN=CVT25_006364 PE=3 SV=1	PD004193/3.0E-133/ACETYLTRANSFERASE ORNITHINE ARGININE BIOSYNTHESIS ARGJ GLUTAMATE N-ACETYLTRANSFERASE TRANSFERASE ACYLTRANSFERASE BIFUNCTIONAL	biological_process:GO:0006526//arginine biosynthetic process;cellular_component:GO:0005759//mitochondrial matrix;GO:0009570//chloroplast stroma;molecular_function:GO:0004358//glutamate N-acetyltransferase activity;GO:0004042//acetyl-CoA:L-glutamate N-acetyltransferase activity;GO:0103045//methione N-acyltransferase activity;
RHS04578	NA	NA	NA	NA	A0A0C9X604/5e-118/A0A0C9X604_9AGAR Unplaced genomic scaffold K443scaffold_90, whole genome shotgun sequence OS=Laccaria amethystina LaAM-08-1 OX=1095629 GN=K443DRAFT_7653 PE=4 SV=1	NA	NA
RHS04579	NA	A7KAM4/1e-24/ATG13_PENRW Autophagy-related protein 13 OS=Penicillium rubens (strain ATCC 28089 / DSM 1075 / NRRL 1951 / Wisconsin 54-1255) OX=500485 GN=atg13 PE=3 SV=1	pxb:103943326/2e-06/autophagy-related protein 13a-like; K08331 autophagy-related protein 13	SPAC4F10.07c/7e-18/[U] KOG4573 Phosphoprotein involved in cytoplasm to vacuole targeting and autophagy	A0A067TKK7/0.0/A0A067TKK7_GALM3 Autophagy-related protein 13 OS=Galerina marginata (strain CBS 339.88) OX=685588 GN=GALMADRAFT_243561 PE=3 SV=1	PF10033/2.0E-48/Autophagy-related protein 13	NA
RHS04580	XP_011044868.1/7.28297e-48/PREDICTED: cytochrome P450 94C1-like [Populus euphratica]	Q9Y757/1e-73/CP52L_DEBHN Cytochrome P450 52A12 OS=Debaryomyces hansenii OX=4959 GN=CYP52A12 PE=2 SV=2	cann:107875644/3e-48/cytochrome P450 94C1-like; K20624 12-hydroxyjasmonoyl-L-amino acid 12-hydroxylase / fatty acid hydroxylase [EC:1.14.14.49]	At2g45510/6e-43/[QI] KOG0157 Cytochrome P450 CYP4/CYP19/CYP26 subfamilies	A0A409W4R6/0.0/A0A409W4R6_9AGAR Uncharacterized protein OS=Panaeolus cyanescens OX=181874 GN=CVT24_007649 PE=3 SV=1	PR00385/3.5E-9/P450 superfamily signature	cellular_component:GO:0016021//integral component of membrane;molecular_function:GO:0016705//oxidoreductase activity, acting on paired donors, with incorporation or reduction of molecular oxygen;GO:0020037//heme binding;GO:0005506//iron ion binding;
RHS04581	OSX79606.1/8.74663e-32/hypothetical protein BU14_0074s0036 [Porphyra umbilicalis]	O74818/4e-58/YBJ7_SCHPO Uncharacterized carboxypeptidase C337.07c OS=Schizosaccharomyces pombe (strain 972 / ATCC 24843) OX=284812 GN=SPBC337.07c PE=3 SV=1	NA	SPBC337.07c/2e-58/[S] KOG2650 Zinc carboxypeptidase	A0A067THX1/1e-174/A0A067THX1_GALM3 Uncharacterized protein OS=Galerina marginata (strain CBS 339.88) OX=685588 GN=GALMADRAFT_243580 PE=4 SV=1	PF00246/1.4E-62/Zinc carboxypeptidase	cellular_component:GO:0005615//extracellular space;molecular_function:GO:0008270//zinc ion binding;GO:0004181//metallocarboxypeptidase activity;
RHS04582	AAA53173.1/1.56879e-123/similar to S. cerevisiae PTR2 gene, GenBank Accession Number L11994 [Arabidopsis thaliana]	Q9P380/4e-135/PTR2_SCHPO Probable peptide transporter ptr2 OS=Schizosaccharomyces pombe (strain 972 / ATCC 24843) OX=284812 GN=ptr2 PE=1 SV=1	apro:F751_1467/2e-38/Peptide transporter PTR1; K14638 solute carrier family 15 (peptide/histidine transporter), member 3/4	SPBC13A2.04c/2e-135/[E] KOG1237 H+/oligopeptide symporter	A0A0C3CRU6/0.0/A0A0C3CRU6_HEBCY Uncharacterized protein OS=Hebeloma cylindrosporum h7 OX=686832 GN=M413DRAFT_263342 PE=3 SV=1	PF00854/9.7E-12/POT family	biological_process:GO:0006857//oligopeptide transport;cellular_component:GO:0016021//integral component of membrane;molecular_function:GO:0005215//transporter activity;
RHS04583	ABR17936.1/3.41244e-144/unknown [Picea sitchensis]	B8MYS7/3e-169/MF127_ASPFN MFS glucose transporter mfs1 OS=Aspergillus flavus (strain ATCC 200026 / FGSC A1120 / NRRL 3357 / JCM 12722 / SRRC 167) OX=332952 GN=mfs1 PE=2 SV=1	pxb:103929933/9e-49/inositol transporter 1-like; K08150 MFS transporter, SP family, solute carrier family 2 (myo-inositol transporter), member 13	Hs5902090/8e-42/[G] KOG0569 Permease of the major facilitator superfamily	A0A409XS14/0.0/A0A409XS14_PSICY Uncharacterized protein OS=Psilocybe cyanescens OX=93625 GN=CVT25_005475 PE=3 SV=1	PS50181/10.107/F-box domain profile.	cellular_component:GO:0016021//integral component of membrane;
RHS04584	NA	Q9USN4/8e-25/YJA1_SCHPO Uncharacterized transporter C1529.01 OS=Schizosaccharomyces pombe (strain 972 / ATCC 24843) OX=284812 GN=SPCC1529.01 PE=3 SV=2	NA	SPCC1529.01/3e-25/[R] KOG0255 Synaptic vesicle transporter SVOP and related transporters (major facilitator superfamily)	A0A067T8J9/3e-36/A0A067T8J9_GALM3 Uncharacterized protein (Fragment) OS=Galerina marginata (strain CBS 339.88) OX=685588 GN=GALMADRAFT_63507 PE=4 SV=1	NA	NA
RHS04585	KXZ48094.1/1.97429e-40/hypothetical protein GPECTOR_30g189 [Gonium pectorale]	D7PHY8/8e-87/VRTL_PENAE Efflux pump vrtL OS=Penicillium aethiopicum OX=36650 GN=vrtL PE=1 SV=1	NA	SPCC1529.01/9e-69/[R] KOG0255 Synaptic vesicle transporter SVOP and related transporters (major facilitator superfamily)	A0A067T8H2/7e-131/A0A067T8H2_GALM3 Uncharacterized protein OS=Galerina marginata (strain CBS 339.88) OX=685588 GN=GALMADRAFT_243502 PE=4 SV=1	PF07690/4.5E-32/Major Facilitator Superfamily	biological_process:GO:0055085//transmembrane transport;cellular_component:GO:0016021//integral component of membrane;
RHS04586	XP_008615812.1/4.91372e-22/hypothetical protein SDRG_11549 [Saprolegnia diclina VS20] &gt;EQC30788.1 hypothetical protein SDRG_11549 [Saprolegnia diclina VS20]	D4B1P2/3e-36/A2372_ARTBC Uncharacterized FAD-linked oxidoreductase ARB_02372 OS=Arthroderma benhamiae (strain ATCC MYA-4681 / CBS 112371) OX=663331 GN=ARB_02372 PE=1 SV=1	dcr:108194645/3e-11/tetrahydrocannabinolic acid synthase-like; K22395 cinnamyl-alcohol dehydrogenase [EC:1.1.1.195]	At1g75450/9e-07/[C] KOG1231 Proteins containing the FAD binding domain	A0A369J5C4/0.0/A0A369J5C4_HYPMA Uncharacterized protein OS=Hypsizygus marmoreus OX=39966 GN=Hypma_002803 PE=4 SV=1	PF01565/5.1E-21/FAD binding domain	molecular_function:GO:0016614//oxidoreductase activity, acting on CH-OH group of donors;GO:0050660//flavin adenine dinucleotide binding;
RHS04587	NA	NA	NA	NA	A0A369J5C4/2e-79/A0A369J5C4_HYPMA Uncharacterized protein OS=Hypsizygus marmoreus OX=39966 GN=Hypma_002803 PE=4 SV=1	NA	NA
RHS04588	XP_008615812.1/3.90637e-12/hypothetical protein SDRG_11549 [Saprolegnia diclina VS20] &gt;EQC30788.1 hypothetical protein SDRG_11549 [Saprolegnia diclina VS20]	D4B1P2/9e-23/A2372_ARTBC Uncharacterized FAD-linked oxidoreductase ARB_02372 OS=Arthroderma benhamiae (strain ATCC MYA-4681 / CBS 112371) OX=663331 GN=ARB_02372 PE=1 SV=1	bna:106356750/9e-07/cytokinin dehydrogenase 2 isoform X1; K00279 cytokinin dehydrogenase [EC:1.5.99.12]	At2g19500/2e-06/[C] KOG1231 Proteins containing the FAD binding domain	A0A369J5C4/3e-173/A0A369J5C4_HYPMA Uncharacterized protein OS=Hypsizygus marmoreus OX=39966 GN=Hypma_002803 PE=4 SV=1	PF01565/2.3E-16/FAD binding domain	molecular_function:GO:0016614//oxidoreductase activity, acting on CH-OH group of donors;GO:0050660//flavin adenine dinucleotide binding;
RHS04589	NA	NA	NA	NA	A0A0C3BPI9/3e-40/A0A0C3BPI9_HEBCY Uncharacterized protein OS=Hebeloma cylindrosporum h7 OX=686832 GN=M413DRAFT_447790 PE=4 SV=1	NA	NA
RHS04590	XP_008615812.1/1.92724e-22/hypothetical protein SDRG_11549 [Saprolegnia diclina VS20] &gt;EQC30788.1 hypothetical protein SDRG_11549 [Saprolegnia diclina VS20]	D4B1P2/9e-30/A2372_ARTBC Uncharacterized FAD-linked oxidoreductase ARB_02372 OS=Arthroderma benhamiae (strain ATCC MYA-4681 / CBS 112371) OX=663331 GN=ARB_02372 PE=1 SV=1	pop:7462570/9e-10/cytokinin dehydrogenase 3; K00279 cytokinin dehydrogenase [EC:1.5.99.12]	At2g19500/5e-08/[C] KOG1231 Proteins containing the FAD binding domain	A0A369J5C4/0.0/A0A369J5C4_HYPMA Uncharacterized protein OS=Hypsizygus marmoreus OX=39966 GN=Hypma_002803 PE=4 SV=1	PS51387/16.108/PCMH-type FAD-binding domain profile.	molecular_function:GO:0016614//oxidoreductase activity, acting on CH-OH group of donors;GO:0050660//flavin adenine dinucleotide binding;
RHS04591	NA	NA	NA	NA	A0A2A9NQ69/4e-111/A0A2A9NQ69_9AGAR Uncharacterized protein OS=Amanita thiersii Skay4041 OX=703135 GN=AMATHDRAFT_62308 PE=4 SV=1	NA	NA
RHS04592	NA	NA	NA	NA	A0A2A9NFP9/3e-31/A0A2A9NFP9_9AGAR Glycoside hydrolase family 16 protein OS=Amanita thiersii Skay4041 OX=703135 GN=AMATHDRAFT_4517 PE=4 SV=1	PF03935/1.5E-15/Beta-glucan synthesis-associated protein (SKN1)	NA
RHS04593	NA	NA	NA	NA	A0A067SUP8/5e-48/A0A067SUP8_GALM3 Uncharacterized protein OS=Galerina marginata (strain CBS 339.88) OX=685588 GN=GALMADRAFT_253734 PE=4 SV=1	NA	NA
RHS04594	KXZ48094.1/4.75188e-83/hypothetical protein GPECTOR_30g189 [Gonium pectorale]	D7PHY8/6e-160/VRTL_PENAE Efflux pump vrtL OS=Penicillium aethiopicum OX=36650 GN=vrtL PE=1 SV=1	egr:108953840/7e-07/sugar transporter ERD6-like 5 isoform X2; K08145 MFS transporter, SP family, solute carrier family 2 (facilitated glucose transporter), member 8	SPCC1529.01/2e-127/[R] KOG0255 Synaptic vesicle transporter SVOP and related transporters (major facilitator superfamily)	B0DME3/0.0/B0DME3_LACBS MFS polyamine transporter OS=Laccaria bicolor (strain S238N-H82 / ATCC MYA-4686) OX=486041 GN=LACBIDRAFT_252635 PE=4 SV=1	PS50850/27.265/Major facilitator superfamily (MFS) profile.	biological_process:GO:0055085//transmembrane transport;cellular_component:GO:0016021//integral component of membrane;
RHS04595	NA	P53252/5e-10/PIL1_YEAST Sphingolipid long chain base-responsive protein PIL1 OS=Saccharomyces cerevisiae (strain ATCC 204508 / S288c) OX=559292 GN=PIL1 PE=1 SV=1	NA	NA	A0A067THU7/1e-147/A0A067THU7_GALM3 Uncharacterized protein OS=Galerina marginata (strain CBS 339.88) OX=685588 GN=GALMADRAFT_117708 PE=4 SV=1	PF13805/1.5E-16/Eisosome component PIL1	NA
RHS04596	NA	NA	NA	NA	A0A137Q406/7e-49/A0A137Q406_9AGAR Uncharacterized protein OS=Leucoagaricus sp. SymC.cos OX=1714833 GN=AN958_03387 PE=4 SV=1	NA	NA
RHS04597	CCI11511.1/1.04988e-16/unnamed protein product [Albugo candida]	P40855/3e-15/PEX19_HUMAN Peroxisomal biogenesis factor 19 OS=Homo sapiens OX=9606 GN=PEX19 PE=1 SV=1	dzi:111315252/1e-18/peroxisome biogenesis protein 19-2-like; K13337 peroxin-19	7297916/3e-16/[U] KOG3133 40 kDa farnesylated protein associated with peroxisomes	A0A067U319/2e-102/A0A067U319_GALM3 Uncharacterized protein OS=Galerina marginata (strain CBS 339.88) OX=685588 GN=GALMADRAFT_234894 PE=4 SV=1	PF04614/4.1E-59/Pex19 protein family	cellular_component:GO:0005777//peroxisome;
RHS04598	NA	NA	NA	NA	A0A0C9Y782/5e-57/A0A0C9Y782_9AGAR Unplaced genomic scaffold K443scaffold_20, whole genome shotgun sequence OS=Laccaria amethystina LaAM-08-1 OX=1095629 GN=K443DRAFT_674628 PE=4 SV=1	NA	NA
RHS04599	NA	NA	NA	NA	A0A0C9Y782/8e-153/A0A0C9Y782_9AGAR Unplaced genomic scaffold K443scaffold_20, whole genome shotgun sequence OS=Laccaria amethystina LaAM-08-1 OX=1095629 GN=K443DRAFT_674628 PE=4 SV=1	NA	NA
RHS04600	NA	NA	NA	NA	A0A409X0E4/2e-19/A0A409X0E4_9AGAR Uncharacterized protein OS=Gymnopilus dilepis OX=231916 GN=CVT26_012917 PE=4 SV=1	NA	NA
RHS04601	KXZ48094.1/3.67266e-107/hypothetical protein GPECTOR_30g189 [Gonium pectorale]	A0A161CLJ6/8e-107/MRR1_MONRU Citrinin biosynthesis cluster MFS transporter mrr1 OS=Monascus ruber OX=89489 GN=mrr1 PE=3 SV=1	NA	SPCC569.05c/3e-101/[R] KOG0255 Synaptic vesicle transporter SVOP and related transporters (major facilitator superfamily)	A0A409YMD3/0.0/A0A409YMD3_9AGAR Uncharacterized protein OS=Panaeolus cyanescens OX=181874 GN=CVT24_010738 PE=4 SV=1	PS50850/21.14/Major facilitator superfamily (MFS) profile.	biological_process:GO:0055085//transmembrane transport;cellular_component:GO:0016021//integral component of membrane;
RHS04602	NA	NA	NA	NA	A0A0C9XE28/2e-35/A0A0C9XE28_9AGAR Unplaced genomic scaffold K443scaffold_203, whole genome shotgun sequence OS=Laccaria amethystina LaAM-08-1 OX=1095629 GN=K443DRAFT_312900 PE=4 SV=1	NA	NA
RHS04603	GAQ89320.1/5.63616e-07/hypothetical protein KFL_005110020 [Klebsormidium nitens]	NA	nto:104088915/4e-07/protein gamma response 1 isoform X1; K13096 splicing factor 4	NA	A0A0C9WUF1/3e-155/A0A0C9WUF1_9AGAR Unplaced genomic scaffold K443scaffold_52, whole genome shotgun sequence OS=Laccaria amethystina LaAM-08-1 OX=1095629 GN=K443DRAFT_677284 PE=4 SV=1	PF08573/1.3E-23/DNA repair protein endonuclease SAE2/CtIP C-terminus	NA
RHS04604	XP_008615812.1/1.54031e-11/hypothetical protein SDRG_11549 [Saprolegnia diclina VS20] &gt;EQC30788.1 hypothetical protein SDRG_11549 [Saprolegnia diclina VS20]	D4B1P2/2e-24/A2372_ARTBC Uncharacterized FAD-linked oxidoreductase ARB_02372 OS=Arthroderma benhamiae (strain ATCC MYA-4681 / CBS 112371) OX=663331 GN=ARB_02372 PE=1 SV=1	NA	NA	A0A0D2PDI3/0.0/A0A0D2PDI3_9AGAR Uncharacterized protein OS=Hypholoma sublateritium FD-334 SS-4 OX=945553 GN=HYPSUDRAFT_45464 PE=4 SV=1	PF01565/4.1E-16/FAD binding domain	molecular_function:GO:0016614//oxidoreductase activity, acting on CH-OH group of donors;GO:0050660//flavin adenine dinucleotide binding;
RHS04605	NA	NA	NA	NA	K5XLL3/2e-25/K5XLL3_AGABU Uncharacterized protein OS=Agaricus bisporus var. burnettii (strain JB137-S8 / ATCC MYA-4627 / FGSC 10392) OX=597362 GN=AGABI1DRAFT_116372 PE=4 SV=1	PF09531/5.4E-7/Nucleoporin protein Ndc1-Nup	NA
RHS04606	NA	NA	NA	NA	A0A2H3B1K3/2e-65/A0A2H3B1K3_9AGAR Uncharacterized protein OS=Armillaria solidipes OX=1076256 GN=ARMSODRAFT_961625 PE=4 SV=1	PF09531/1.8E-6/Nucleoporin protein Ndc1-Nup	NA
RHS04607	NA	NA	NA	NA	A8NNT3/1e-40/A8NNT3_COPC7 Uncharacterized protein OS=Coprinopsis cinerea (strain Okayama-7 / 130 / ATCC MYA-4618 / FGSC 9003) OX=240176 GN=CC1G_07339 PE=4 SV=1	NA	NA
RHS04608	NA	NA	NA	NA	NA	NA	NA
RHS04609	NA	NA	NA	NA	A8NNT3/6e-52/A8NNT3_COPC7 Uncharacterized protein OS=Coprinopsis cinerea (strain Okayama-7 / 130 / ATCC MYA-4618 / FGSC 9003) OX=240176 GN=CC1G_07339 PE=4 SV=1	NA	NA
RHS04610	KZV15207.1/2.66958e-38/hypothetical protein F511_29956 [Dorcoceras hygrometricum]	P34054/0.0/INDA1_HYPAT Amino-acid permease inda1 OS=Hypocrea atroviridis OX=63577 GN=inda1 PE=2 SV=1	cre:CHLREDRAFT_205765/2e-07/AOC5; cationic amino acid transporter; K03294 basic amino acid/polyamine antiporter, APA family	SPBC19F8.06c/4e-141/[E] KOG1286 Amino acid transporters	B0E358/0.0/B0E358_LACBS APC amino acid permease OS=Laccaria bicolor (strain S238N-H82 / ATCC MYA-4686) OX=486041 GN=LACBIDRAFT_296817 PE=4 SV=1	PF00324/8.2E-64/Amino acid permease	cellular_component:GO:0016021//integral component of membrane;molecular_function:GO:0015171//amino acid transmembrane transporter activity;
RHS04611	OLP89261.1/2.42729e-06/hypothetical protein AK812_SmicGene29298 [Symbiodinium microadriaticum]	NA	NA	NA	A0A0W0FSF2/6e-37/A0A0W0FSF2_9AGAR Uncharacterized protein OS=Moniliophthora roreri OX=221103 GN=WG66_8111 PE=4 SV=1	NA	NA
RHS04612	OQR90292.1/2.56839e-98/hypothetical protein THRCLA_09381 [Thraustotheca clavata]	Q7LKZ7/6e-127/BPH1_SCHPO Beige protein homolog 1 OS=Schizosaccharomyces pombe (strain 972 / ATCC 24843) OX=284812 GN=lvs1 PE=1 SV=2	mus:103978832/3e-96/protein SPIRRIG-like; K22262 WD repeat and FYVE domain-containing protein 3	Hs22044271/2e-110/[TU] KOG1786 Lysosomal trafficking regulator LYST and related BEACH and WD40 repeat proteins	A0A0C9WQZ0/0.0/A0A0C9WQZ0_9AGAR Unplaced genomic scaffold K443scaffold_295, whole genome shotgun sequence OS=Laccaria amethystina LaAM-08-1 OX=1095629 GN=K443DRAFT_134975 PE=4 SV=1	PS50294/14.582/Trp-Asp (WD) repeats circular profile.	NA
RHS04613	NA	Q9GMY6/7e-10/PEPA_CANLF Pepsin A OS=Canis lupus familiaris OX=9615 GN=PGA PE=2 SV=1	NA	7300253/2e-08/[O] KOG1339 Aspartyl protease	A0A0D2L6J3/0.0/A0A0D2L6J3_9AGAR Uncharacterized protein OS=Hypholoma sublateritium FD-334 SS-4 OX=945553 GN=HYPSUDRAFT_40980 PE=3 SV=1	PF00026/2.1E-16/Eukaryotic aspartyl protease	NA
RHS04614	NA	NA	NA	NA	A0A0C3AZ83/3e-57/A0A0C3AZ83_9AGAM Uncharacterized protein OS=Piloderma croceum F 1598 OX=765440 GN=PILCRDRAFT_563331 PE=4 SV=1	PF02458/4.5E-6/Transferase family	NA
RHS04615	GAQ82047.1/2.11086e-57/hypothetical protein KFL_000980340 [Klebsormidium nitens]	Q09906/1e-99/TM184_SCHPO Transmembrane protein 184 homolog C30D11.06c OS=Schizosaccharomyces pombe (strain 972 / ATCC 24843) OX=284812 GN=SPAC30D11.06c PE=1 SV=1	NA	SPAC30D11.06c/6e-100/[T] KOG2641 Predicted seven transmembrane receptor - rhodopsin family	A0A369JAI5/0.0/A0A369JAI5_HYPMA Uncharacterized protein OS=Hypsizygus marmoreus OX=39966 GN=Hypma_002814 PE=4 SV=1	PF03619/1.2E-95/Organic solute transporter Ostalpha	biological_process:GO:0006810//transport;cellular_component:GO:0016021//integral component of membrane;molecular_function:GO:0005215//transporter activity;
RHS04616	XP_004299990.1/9.50525e-45/PREDICTED: peroxiredoxin-2B [Fragaria vesca subsp. vesca]	Q9XEX2/4e-39/PRX2B_ARATH Peroxiredoxin-2B OS=Arabidopsis thaliana OX=3702 GN=PRXIIB PE=1 SV=1	ath:AT1G60740/1e-36/Thioredoxin superfamily protein; K03386 peroxiredoxin (alkyl hydroperoxide reductase subunit C) [EC:1.11.1.15]	At1g65980/2e-39/[O] KOG0541 Alkyl hydroperoxide reductase/peroxiredoxin	A0A165Q550/6e-83/A0A165Q550_9AGAM Peroxiredoxin (Fragment) OS=Neolentinus lepideus HHB14362 ss-1 OX=1314782 GN=NEOLEDRAFT_1120489 PE=3 SV=1	PF08534/1.1E-32/Redoxin	biological_process:GO:0045454//cell redox homeostasis;cellular_component:GO:0005623//cell;molecular_function:GO:0016491//oxidoreductase activity;
RHS04617	GAQ92572.1/1.8064e-56/catalase [Klebsormidium nitens]	P55306/2e-72/CATA_SCHPO Catalase OS=Schizosaccharomyces pombe (strain 972 / ATCC 24843) OX=284812 GN=cta1 PE=1 SV=1	csv:105435392/5e-63/catalase isozyme 1-like; K03781 catalase [EC:1.11.1.6]	SPCC757.07c/7e-73/[P] KOG0047 Catalase	W4K1Y7/5e-131/W4K1Y7_9AGAM Catalase OS=Heterobasidion irregulare TC 32-1 OX=747525 GN=HETIRDRAFT_64639 PE=3 SV=1	PR00067/4.3E-15/Catalase signature	biological_process:GO:0006979//response to oxidative stress;GO:0042744//hydrogen peroxide catabolic process;molecular_function:GO:0046872//metal ion binding;GO:0020037//heme binding;GO:0004096//catalase activity;
RHS04618	EWM20937.1/2.57521e-103/catalase [Nannochloropsis gaditana]	P55306/9e-128/CATA_SCHPO Catalase OS=Schizosaccharomyces pombe (strain 972 / ATCC 24843) OX=284812 GN=cta1 PE=1 SV=1	ppp:112295083/2e-101/uncharacterized protein LOC112295083; K03781 catalase [EC:1.11.1.6]	SPCC757.07c/4e-128/[P] KOG0047 Catalase	W4K1Y7/0.0/W4K1Y7_9AGAM Catalase OS=Heterobasidion irregulare TC 32-1 OX=747525 GN=HETIRDRAFT_64639 PE=3 SV=1	PF06628/1.5E-13/Catalase-related immune-responsive	biological_process:GO:0006979//response to oxidative stress;GO:0042744//hydrogen peroxide catabolic process;GO:0042542//response to hydrogen peroxide;cellular_component:GO:0005777//peroxisome;GO:0005739//mitochondrion;molecular_function:GO:0046872//metal ion binding;GO:0020037//heme binding;GO:0004096//catalase activity;
RHS04619	OQR98801.1/1.22108e-128/transaldolase [Achlya hypogyna]	O42700/8e-153/TAL1_SCHPO Transaldolase OS=Schizosaccharomyces pombe (strain 972 / ATCC 24843) OX=284812 GN=tal1 PE=1 SV=2	gsl:Gasu_24580/8e-113/transaldolase; K00616 transaldolase [EC:2.2.1.2]	SPCC1020.06c/3e-153/[G] KOG2772 Transaldolase	F8QBM9/0.0/F8QBM9_SERL3 Transaldolase OS=Serpula lacrymans var. lacrymans (strain S7.3) OX=936435 GN=SERLA73DRAFT_144458 PE=3 SV=1	TIGR00874/1.3E-143/talAB: transaldolase	biological_process:GO:0006098//pentose-phosphate shunt;GO:0005975//carbohydrate metabolic process;cellular_component:GO:0005737//cytoplasm;molecular_function:GO:0004801//sedoheptulose-7-phosphate:D-glyceraldehyde-3-phosphate glyceronetransferase activity;
RHS04620	XP_013894254.1/1.65575e-10/hypothetical protein MNEG_12729 [Monoraphidium neglectum] &gt;KIY95234.1 hypothetical protein MNEG_12729 [Monoraphidium neglectum]	B8NM79/4e-16/USTS_ASPFN Glutathione S-transferase-like protein ustS OS=Aspergillus flavus (strain ATCC 200026 / FGSC A1120 / NRRL 3357 / JCM 12722 / SRRC 167) OX=332952 GN=ustS PE=1 SV=2	NA	NA	A0A0C9XKU8/2e-126/A0A0C9XKU8_9AGAR Unplaced genomic scaffold K443scaffold_139, whole genome shotgun sequence OS=Laccaria amethystina LaAM-08-1 OX=1095629 GN=K443DRAFT_104292 PE=4 SV=1	PF13417/1.5E-5/Glutathione S-transferase, N-terminal domain	NA
RHS04621	XP_018824402.1/4.74232e-14/PREDICTED: protein NLRC3 [Juglans regia]	A7Z026/2e-23/PPR37_BOVIN Protein phosphatase 1 regulatory subunit 37 OS=Bos taurus OX=9913 GN=PPP1R37 PE=2 SV=1	jre:108993823/9e-15/protein NLRC3; K22614 NLR family CARD domain-containing protein 3	CE25864/3e-18/[A] KOG1908 Ribonuclease inhibitor type leucine-rich repeat proteins	A0A067T866/0.0/A0A067T866_GALM3 Uncharacterized protein OS=Galerina marginata (strain CBS 339.88) OX=685588 GN=GALMADRAFT_243316 PE=4 SV=1	PF13516/0.016/Leucine Rich repeat	NA
RHS04622	XP_009840196.1/7.44917e-46/hypothetical protein H257_14139 [Aphanomyces astaci] &gt;ETV70484.1 hypothetical protein H257_14139 [Aphanomyces astaci]	O94561/1e-35/PRX_SCHPO Peroxiredoxin bcp1 OS=Schizosaccharomyces pombe (strain 972 / ATCC 24843) OX=284812 GN=bcp1 PE=1 SV=1	apro:F751_4449/4e-27/Peroxiredoxin; K03564 peroxiredoxin Q/BCP [EC:1.11.1.15]	SPBC1773.02c/5e-36/[O] KOG0855 Alkyl hydroperoxide reductase, thiol specific antioxidant and related enzymes	A0A369J2Z6/2e-104/A0A369J2Z6_HYPMA Uncharacterized protein OS=Hypsizygus marmoreus OX=39966 GN=Hypma_002779 PE=4 SV=1	PF00578/4.7E-28/AhpC/TSA family	biological_process:GO:0045454//cell redox homeostasis;cellular_component:GO:0005623//cell;molecular_function:GO:0016209//antioxidant activity;GO:0016491//oxidoreductase activity;
RHS04623	NA	NA	NA	NA	A0A067THE5/1e-65/A0A067THE5_GALM3 Uncharacterized protein OS=Galerina marginata (strain CBS 339.88) OX=685588 GN=GALMADRAFT_243321 PE=4 SV=1	NA	NA
RHS04624	XP_005648050.1/6.98279e-21/S-adenosyl-L-methionine-dependent methyltransferase [Coccomyxa subellipsoidea C-169] &gt;EIE23506.1 S-adenosyl-L-methionine-dependent methyltransferase [Coccomyxa subellipsoidea C-169]	A6ZRD1/1e-25/TMT1_YEAS7 Trans-aconitate 3-methyltransferase OS=Saccharomyces cerevisiae (strain YJM789) OX=307796 GN=TMT1 PE=3 SV=1	apro:F751_5669/5e-13/putative aarF domain-containing protein kinase 1; K08869 aarF domain-containing kinase	YER175c/6e-26/[R] KOG3010 Methyltransferase	A0A409XPV6/4e-129/A0A409XPV6_PSICY Uncharacterized protein OS=Psilocybe cyanescens OX=93625 GN=CVT25_015357 PE=4 SV=1	PF13649/7.1E-13/Methyltransferase domain	molecular_function:GO:0008168//methyltransferase activity;
RHS04625	XP_005787774.1/1.73902e-126/succinate dehydrogenase iron-sulfur subunit, subunit B [Emiliania huxleyi CCMP1516] &gt;EOD35345.1 succinate dehydrogenase iron-sulfur subunit, subunit B [Emiliania huxleyi CCMP1516]	Q70KF8/3e-146/SDHB_UROFA Succinate dehydrogenase [ubiquinone] iron-sulfur subunit, mitochondrial OS=Uromyces fabae OX=55588 GN=SDH2 PE=3 SV=1	gab:108458328/1e-116/succinate dehydrogenase [ubiquinone] iron-sulfur subunit 2, mitochondrial; K00235 succinate dehydrogenase (ubiquinone) iron-sulfur subunit [EC:1.3.5.1]	SPAC140.01/6e-134/[C] KOG3049 Succinate dehydrogenase, Fe-S protein subunit	A0A165ZW91/1e-177/A0A165ZW91_9AGAM Succinate dehydrogenase [ubiquinone] iron-sulfur subunit, mitochondrial OS=Fibularhizoctonia sp. CBS 109695 OX=436010 GN=FIBSPDRAFT_757358 PE=3 SV=1	PF13534/8.0E-11/4Fe-4S dicluster domain	biological_process:GO:0006099//tricarboxylic acid cycle;cellular_component:GO:0005743//mitochondrial inner membrane;molecular_function:GO:0009055//electron transfer activity;GO:0051537//2 iron, 2 sulfur cluster binding;GO:0046872//metal ion binding;GO:0051539//4 iron, 4 sulfur cluster binding;GO:0008177//succinate dehydrogenase (ubiquinone) activity;GO:0051538//3 iron, 4 sulfur cluster binding;
RHS04626	XP_015872387.1/1.45809e-66/PREDICTED: hydroxyquinol 1,2-dioxygenase-like, partial [Ziziphus jujuba]	P86029/5e-53/HQD2_CANAL Catechol 1,2-dioxygenase OS=Candida albicans (strain SC5314 / ATCC MYA-2876) OX=237561 GN=HQD2 PE=1 SV=1	NA	NA	A0A369K9L3/1e-167/A0A369K9L3_HYPMA Hydroxyquinol 1,2-dioxygenase OS=Hypsizygus marmoreus OX=39966 GN=chqB PE=4 SV=1	PF00775/2.5E-45/Dioxygenase	NA
RHS04627	NA	O13300/7e-12/HYP3_AGABI Hydrophobin-3 OS=Agaricus bisporus OX=5341 GN=abh3 PE=3 SV=1	NA	NA	A0A369KDH2/3e-14/A0A369KDH2_HYPMA Hydrophobin OS=Hypsizygus marmoreus OX=39966 GN=abh3_3 PE=3 SV=1	PF01185/4.2E-11/Fungal hydrophobin	NA
RHS04628	XP_015872387.1/1.10292e-46/PREDICTED: hydroxyquinol 1,2-dioxygenase-like, partial [Ziziphus jujuba]	P86029/3e-40/HQD2_CANAL Catechol 1,2-dioxygenase OS=Candida albicans (strain SC5314 / ATCC MYA-2876) OX=237561 GN=HQD2 PE=1 SV=1	NA	NA	A0A369K9L3/2e-126/A0A369K9L3_HYPMA Hydroxyquinol 1,2-dioxygenase OS=Hypsizygus marmoreus OX=39966 GN=chqB PE=4 SV=1	PF00775/6.5E-38/Dioxygenase	NA
RHS04629	XP_015872387.1/1.04479e-70/PREDICTED: hydroxyquinol 1,2-dioxygenase-like, partial [Ziziphus jujuba]	P86029/2e-55/HQD2_CANAL Catechol 1,2-dioxygenase OS=Candida albicans (strain SC5314 / ATCC MYA-2876) OX=237561 GN=HQD2 PE=1 SV=1	NA	NA	A0A369K9L3/0.0/A0A369K9L3_HYPMA Hydroxyquinol 1,2-dioxygenase OS=Hypsizygus marmoreus OX=39966 GN=chqB PE=4 SV=1	PF04444/6.1E-32/Catechol dioxygenase N terminus	NA
RHS04630	NA	O13300/3e-22/HYP3_AGABI Hydrophobin-3 OS=Agaricus bisporus OX=5341 GN=abh3 PE=3 SV=1	NA	NA	A0A0C9WGA8/2e-25/A0A0C9WGA8_9AGAM Hydrophobin OS=Hydnomerulius pinastri MD-312 OX=994086 GN=HYDPIDRAFT_89074 PE=3 SV=1	PF01185/6.5E-20/Fungal hydrophobin	NA
RHS04631	NA	O13300/1e-22/HYP3_AGABI Hydrophobin-3 OS=Agaricus bisporus OX=5341 GN=abh3 PE=3 SV=1	NA	NA	V2X9Z8/7e-29/V2X9Z8_MONRO Hydrophobin OS=Moniliophthora roreri (strain MCA 2997) OX=1381753 GN=Moror_8677 PE=3 SV=1	PF01185/5.1E-22/Fungal hydrophobin	NA
RHS04632	NA	NA	NA	NA	A0A369J9P9/3e-38/A0A369J9P9_HYPMA Uncharacterized protein OS=Hypsizygus marmoreus OX=39966 GN=Hypma_002817 PE=4 SV=1	NA	NA
RHS04633	NA	NA	NA	NA	A0A0C9Y149/3e-60/A0A0C9Y149_9AGAR Unplaced genomic scaffold K443scaffold_66, whole genome shotgun sequence OS=Laccaria amethystina LaAM-08-1 OX=1095629 GN=K443DRAFT_678091 PE=4 SV=1	NA	NA
RHS04634	NA	NA	NA	NA	A0A0C2WFZ5/9e-27/A0A0C2WFZ5_AMAMU Uncharacterized protein OS=Amanita muscaria Koide BX008 OX=946122 GN=M378DRAFT_923199 PE=4 SV=1	NA	NA
RHS04635	BAK01187.1/0/predicted protein [Hordeum vulgare subsp. vulgare]	O00087/0.0/DLDH_SCHPO Dihydrolipoyl dehydrogenase, mitochondrial OS=Schizosaccharomyces pombe (strain 972 / ATCC 24843) OX=284812 GN=dld1 PE=2 SV=2	ath:AT1G48030/0.0/mtLPD1; mitochondrial lipoamide dehydrogenase 1; K00382 dihydrolipoamide dehydrogenase [EC:1.8.1.4]	SPAC1002.09c/0.0/[C] KOG1335 Dihydrolipoamide dehydrogenase	B0CUB1/0.0/B0CUB1_LACBS Dihydrolipoyl dehydrogenase OS=Laccaria bicolor (strain S238N-H82 / ATCC MYA-4686) OX=486041 GN=LACBIDRAFT_182385 PE=3 SV=1	PR00368/2.4E-37/FAD-dependent pyridine nucleotide reductase signature	biological_process:GO:0045454//cell redox homeostasis;GO:0046686//response to cadmium ion;cellular_component:GO:0005759//mitochondrial matrix;GO:0048046//apoplast;GO:0005747//mitochondrial respiratory chain complex I;GO:0005623//cell;GO:0005739//mitochondrion;molecular_function:GO:0009055//electron transfer activity;GO:0004148//dihydrolipoyl dehydrogenase activity;GO:0005524//ATP binding;GO:00506…
RHS04636	OMO73730.1/2.21332e-38/hypothetical protein COLO4_26885 [Corchorus olitorius]	Q80UW5/4e-49/MRCKG_MOUSE Serine/threonine-protein kinase MRCK gamma OS=Mus musculus OX=10090 GN=Cdc42bpg PE=1 SV=2	boe:106304454/5e-40/serine/threonine-protein kinase tricorner; K08790 serine/threonine kinase 38 [EC:2.7.11.1]	Hs4505831/1e-47/[T] KOG0612 Rho-associated, coiled-coil containing protein kinase	A0A067THW8/0.0/A0A067THW8_GALM3 Uncharacterized protein OS=Galerina marginata (strain CBS 339.88) OX=685588 GN=GALMADRAFT_243570 PE=4 SV=1	PS50011/31.114/Protein kinase domain profile.	molecular_function:GO:0004674//protein serine/threonine kinase activity;GO:0005524//ATP binding;
RHS04637	XP_021307724.1/4.97217e-83/beta-glucosidase 7 [Sorghum bicolor] &gt;KXG37767.1 hypothetical protein SORBI_3001G123300 [Sorghum bicolor]	Q75I93/2e-81/BGL07_ORYSJ Beta-glucosidase 7 OS=Oryza sativa subsp. japonica OX=39947 GN=BGLU7 PE=1 SV=1	sbi:110432056/9e-84/beta-glucosidase 7; K05350 beta-glucosidase [EC:3.2.1.21]	At3g18080/5e-76/[G] KOG0626 Beta-glucosidase, lactase phlorizinhydrolase, and related proteins	A0A067TTN0/0.0/A0A067TTN0_GALM3 Uncharacterized protein OS=Galerina marginata (strain CBS 339.88) OX=685588 GN=GALMADRAFT_152200 PE=3 SV=1	PF00067/1.0E-35/Cytochrome P450	biological_process:GO:0005975//carbohydrate metabolic process;molecular_function:GO:0004553//hydrolase activity, hydrolyzing O-glycosyl compounds;
RHS04638	XP_009526513.1/5.65495e-37/hypothetical protein PHYSODRAFT_560104 [Phytophthora sojae] &gt;EGZ17455.1 hypothetical protein PHYSODRAFT_560104 [Phytophthora sojae]	Q0CJ62/2e-37/ATA_ASPTN 6-methylsalicylic acid decarboxylase atA OS=Aspergillus terreus (strain NIH 2624 / FGSC A1156) OX=341663 GN=atA PE=1 SV=1	pxb:103939772/8e-23/uncharacterized protein LOC103939772; K00480 salicylate hydroxylase [EC:1.14.13.1]	At2g35660/3e-11/[CR] KOG2614 Kynurenine 3-monooxygenase and related flavoprotein monooxygenases	A0A0D2NDS0/5e-134/A0A0D2NDS0_9AGAR Uncharacterized protein OS=Hypholoma sublateritium FD-334 SS-4 OX=945553 GN=HYPSUDRAFT_92215 PE=4 SV=1	PR00420/2.1E-24/Aromatic-ring hydroxylase (flavoprotein monooxygenase) signature	molecular_function:GO:0071949//FAD binding;
RHS04639	NA	NA	NA	NA	A0A369JD78/1e-145/A0A369JD78_HYPMA EGF domain-specific O-linked N-acetylglucosamine transferase OS=Hypsizygus marmoreus OX=39966 GN=Eogt_0 PE=4 SV=1	PF04577/2.3E-19/Protein of unknown function (DUF563)	NA
RHS04640	NA	NA	NA	NA	A0A369JD78/2e-134/A0A369JD78_HYPMA EGF domain-specific O-linked N-acetylglucosamine transferase OS=Hypsizygus marmoreus OX=39966 GN=Eogt_0 PE=4 SV=1	PF04577/1.2E-10/Protein of unknown function (DUF563)	NA
RHS04641	NA	Q9VQB7/1e-06/EOGT_DROME EGF domain-specific O-linked N-acetylglucosamine transferase OS=Drosophila melanogaster OX=7227 GN=Eogt PE=1 SV=1	NA	7295961/6e-07/[S] KOG4698 Uncharacterized conserved protein	A0A369JD78/1e-171/A0A369JD78_HYPMA EGF domain-specific O-linked N-acetylglucosamine transferase OS=Hypsizygus marmoreus OX=39966 GN=Eogt_0 PE=4 SV=1	PF04577/1.7E-21/Protein of unknown function (DUF563)	NA
RHS04642	GAV61079.1/0/E1-E2_ATPase domain-containing protein/HAD domain-containing protein [Cephalotus follicularis]	P32660/0.0/ATC5_YEAST Phospholipid-transporting ATPase DNF1 OS=Saccharomyces cerevisiae (strain ATCC 204508 / S288c) OX=559292 GN=DNF1 PE=1 SV=2	hbr:110673356/0.0/phospholipid-transporting ATPase 3-like; K14802 phospholipid-transporting ATPase [EC:7.6.2.1]	SPAC24B11.12c/0.0/[R] KOG0206 P-type ATPase	A0A0D2NNG9/0.0/A0A0D2NNG9_9AGAR Phospholipid-transporting ATPase OS=Hypholoma sublateritium FD-334 SS-4 OX=945553 GN=HYPSUDRAFT_45491 PE=3 SV=1	PF16212/6.2E-72/Phospholipid-translocating P-type ATPase C-terminal	NA
RHS04643	XP_009351114.1/1.13691e-11/PREDICTED: activator of stress genes 1-like [Pyrus x bretschneideri]	P87000/4e-11/ACU15_NEUCR Transcriptional activator protein acu-15 OS=Neurospora crassa (strain ATCC 24698 / 74-OR23-1A / CBS 708.71 / DSM 1257 / FGSC 987) OX=367110 GN=acu-15 PE=1 SV=2	NA	NA	A0A409W8K3/0.0/A0A409W8K3_9AGAR Uncharacterized protein OS=Panaeolus cyanescens OX=181874 GN=CVT24_003660 PE=4 SV=1	PF04082/2.9E-21/Fungal specific transcription factor domain	NA
RHS04644	XP_008876233.1/2.88763e-20/hypothetical protein H310_11354 [Aphanomyces invadans] &gt;ETV95059.1 hypothetical protein H310_11354 [Aphanomyces invadans]	Q6AYT7/6e-27/ABD12_RAT Lysophosphatidylserine lipase ABHD12 OS=Rattus norvegicus OX=10116 GN=Abhd12 PE=2 SV=1	gsl:Gasu_59350/2e-16/hydrolase; K06889 uncharacterized protein	Hs20559602/6e-27/[R] KOG1552 Predicted alpha/beta hydrolase	A0A067T837/3e-163/A0A067T837_GALM3 Uncharacterized protein OS=Galerina marginata (strain CBS 339.88) OX=685588 GN=GALMADRAFT_243390 PE=4 SV=1	PF12146/1.8E-9/Serine aminopeptidase, S33	cellular_component:GO:0016021//integral component of membrane;
RHS04645	NA	NA	NA	NA	A0A409W659/6e-08/A0A409W659_9AGAR Uncharacterized protein OS=Panaeolus cyanescens OX=181874 GN=CVT24_012483 PE=4 SV=1	NA	NA
RHS04646	XP_002981476.1/1.24213e-39/hypothetical protein SELMODRAFT_114354 [Selaginella moellendorffii] &gt;EFJ17664.1 hypothetical protein SELMODRAFT_114354 [Selaginella moellendorffii]	Q9URY9/2e-61/YI06_SCHPO Uncharacterized hemerythrin-like protein C869.06c OS=Schizosaccharomyces pombe (strain 972 / ATCC 24843) OX=284812 GN=SPAC869.06c PE=3 SV=1	NA	NA	A0A0D2M548/2e-79/A0A0D2M548_9AGAR Uncharacterized protein OS=Hypholoma sublateritium FD-334 SS-4 OX=945553 GN=HYPSUDRAFT_191212 PE=4 SV=1	PF01814/4.9E-11/Hemerythrin HHE cation binding domain	NA
RHS04647	XP_009390358.1/7.91119e-26/PREDICTED: microsomal glutathione S-transferase 3-like isoform X2 [Musa acuminata subsp. malaccensis]	O14880/5e-13/MGST3_HUMAN Microsomal glutathione S-transferase 3 OS=Homo sapiens OX=9606 GN=MGST3 PE=1 SV=1	mus:103976762/1e-26/microsomal glutathione S-transferase 3-like isoform X2; K00799 glutathione S-transferase [EC:2.5.1.18]	At1g65820/4e-21/[O] TWOG0060 Microsomal glutathione S-transferase	A0A0C2YIR5/3e-47/A0A0C2YIR5_HEBCY Uncharacterized protein OS=Hebeloma cylindrosporum h7 OX=686832 GN=M413DRAFT_113166 PE=4 SV=1	PF01124/1.9E-10/MAPEG family	cellular_component:GO:0005783//endoplasmic reticulum;GO:0005794//Golgi apparatus;GO:0016021//integral component of membrane;GO:0005773//vacuole;
RHS04648	NA	NA	NA	NA	A0A369J7Z5/1e-12/A0A369J7Z5_HYPMA Uncharacterized protein OS=Hypsizygus marmoreus OX=39966 GN=Hypma_002916 PE=4 SV=1	NA	NA
RHS04649	NA	NA	NA	NA	A0A067TAJ3/2e-30/A0A067TAJ3_GALM3 Uncharacterized protein OS=Galerina marginata (strain CBS 339.88) OX=685588 GN=GALMADRAFT_223599 PE=4 SV=1	NA	NA
RHS04650	NA	NA	NA	NA	A0A0C2YCA7/2e-11/A0A0C2YCA7_HEBCY Uncharacterized protein OS=Hebeloma cylindrosporum h7 OX=686832 GN=M413DRAFT_244038 PE=4 SV=1	NA	NA
RHS04651	XP_019186018.1/1.99245e-06/PREDICTED: RING-H2 finger protein ATL57-like [Ipomoea nil]	Q10322/5e-60/DMA1_SCHPO Probable E3 ubiquitin-protein ligase dma1 OS=Schizosaccharomyces pombe (strain 972 / ATCC 24843) OX=284812 GN=dma1 PE=1 SV=1	NA	SPAC17G8.10c/2e-60/[T] KOG3872 FOG: FHA domain	A0A0C9XQC5/2e-169/A0A0C9XQC5_9AGAR Unplaced genomic scaffold K443scaffold_139, whole genome shotgun sequence OS=Laccaria amethystina LaAM-08-1 OX=1095629 GN=K443DRAFT_680942 PE=4 SV=1	PF17123/7.6E-11/RING-like zinc finger	NA
RHS04652	XP_009526513.1/6.86628e-39/hypothetical protein PHYSODRAFT_560104 [Phytophthora sojae] &gt;EGZ17455.1 hypothetical protein PHYSODRAFT_560104 [Phytophthora sojae]	Q0CJ62/1e-38/ATA_ASPTN 6-methylsalicylic acid decarboxylase atA OS=Aspergillus terreus (strain NIH 2624 / FGSC A1156) OX=341663 GN=atA PE=1 SV=1	pxb:103939772/2e-28/uncharacterized protein LOC103939772; K00480 salicylate hydroxylase [EC:1.14.13.1]	At5g67030/4e-16/[CR] KOG2614 Kynurenine 3-monooxygenase and related flavoprotein monooxygenases	A0A0D2NDS0/2e-123/A0A0D2NDS0_9AGAR Uncharacterized protein OS=Hypholoma sublateritium FD-334 SS-4 OX=945553 GN=HYPSUDRAFT_92215 PE=4 SV=1	PF01494/1.1E-23/FAD binding domain	molecular_function:GO:0071949//FAD binding;
RHS04653	NA	NA	NA	NA	A0A0C2YCX5/8e-26/A0A0C2YCX5_HEBCY Uncharacterized protein OS=Hebeloma cylindrosporum h7 OX=686832 GN=M413DRAFT_447569 PE=4 SV=1	NA	NA
RHS04654	NA	NA	NA	NA	A0A409VRI0/1e-17/A0A409VRI0_PSICY Uncharacterized protein OS=Psilocybe cyanescens OX=93625 GN=CVT25_009018 PE=4 SV=1	NA	NA
RHS04655	XP_007513327.1/2.91973e-09/predicted protein [Bathycoccus prasinos] &gt;CCO16885.1 predicted protein [Bathycoccus prasinos]	NA	ota:OT_ostta06g00030/1e-07/Target SNARE coiled-coil domain; K08504 blocked early in transport 1	NA	A0A137Q3X2/9e-52/A0A137Q3X2_9AGAR Uncharacterized protein OS=Leucoagaricus sp. SymC.cos OX=1714833 GN=AN958_03383 PE=4 SV=1	PS50192/14.217/t-SNARE coiled-coil homology domain profile.	cellular_component:GO:0016021//integral component of membrane;
RHS04656	NA	NA	NA	NA	A0A137Q6W4/4e-11/A0A137Q6W4_9AGAR Uncharacterized protein OS=Leucoagaricus sp. SymC.cos OX=1714833 GN=AN958_01979 PE=4 SV=1	NA	NA
RHS04657	NA	NA	NA	NA	A0A369J7K5/1e-95/A0A369J7K5_HYPMA Uncharacterized protein OS=Hypsizygus marmoreus OX=39966 GN=Hypma_002822 PE=4 SV=1	NA	NA
RHS04658	NA	NA	NA	NA	A0A067T8G9/0.0/A0A067T8G9_GALM3 Uncharacterized protein OS=Galerina marginata (strain CBS 339.88) OX=685588 GN=GALMADRAFT_1241203 PE=4 SV=1	NA	NA
RHS04659	XP_008861974.1/1.20398e-76/hypothetical protein H310_00829 [Aphanomyces invadans] &gt;ETW10563.1 hypothetical protein H310_00829 [Aphanomyces invadans]	Q6FTN2/1e-67/DIC1_CANGA Mitochondrial dicarboxylate transporter OS=Candida glabrata (strain ATCC 2001 / CBS 138 / JCM 3761 / NBRC 0622 / NRRL Y-65) OX=284593 GN=DIC1 PE=3 SV=1	cam:101493136/5e-64/mitochondrial uncoupling protein 5-like; K15104 solute carrier family 25 (mitochondrial oxoglutarate transporter), member 11	7299751/4e-69/[C] KOG0759 Mitochondrial oxoglutarate/malate carrier proteins	A0A409XYD2/0.0/A0A409XYD2_9AGAR Uncharacterized protein OS=Gymnopilus dilepis OX=231916 GN=CVT26_015890 PE=3 SV=1	PF00153/2.1E-15/Mitochondrial carrier protein	biological_process:GO:0006839//mitochondrial transport;cellular_component:GO:0016021//integral component of membrane;GO:0031966//mitochondrial membrane;
RHS04660	NA	NA	NA	NA	A0A0C9X0D0/1e-20/A0A0C9X0D0_9AGAR Unplaced genomic scaffold K443scaffold_536, whole genome shotgun sequence OS=Laccaria amethystina LaAM-08-1 OX=1095629 GN=K443DRAFT_115762 PE=4 SV=1	NA	NA
RHS04661	NA	D3Z902/4e-14/FBXW7_RAT F-box/WD repeat-containing protein 7 OS=Rattus norvegicus OX=10116 GN=Fbxw7 PE=1 SV=2	csl:COCSUDRAFT_23114/1e-07/WD40 repeat-like protein; K10260 F-box and WD-40 domain protein 7	Hs16117781/2e-14/[R] KOG0274 Cdc4 and related F-box and WD-40 proteins	A0A409XU10/0.0/A0A409XU10_PSICY Uncharacterized protein OS=Psilocybe cyanescens OX=93625 GN=CVT25_003818 PE=4 SV=1	PS50294/10.812/Trp-Asp (WD) repeats circular profile.	NA
RHS04662	NA	NA	NA	NA	NA	NA	NA
RHS04663	XP_008342080.2/4.13803e-10/PREDICTED: LOW QUALITY PROTEIN: origin of replication complex subunit 5-like [Malus domestica]	Q9WUV0/1e-23/ORC5_MOUSE Origin recognition complex subunit 5 OS=Mus musculus OX=10090 GN=Orc5 PE=2 SV=1	mdm:103404864/8e-11/origin of replication complex subunit 5-like; K02607 origin recognition complex subunit 5	Hs4505525/7e-21/[L] KOG2543 Origin recognition complex, subunit 5	A0A369JAK4/1e-165/A0A369JAK4_HYPMA Origin recognition complex subunit 5 OS=Hypsizygus marmoreus OX=39966 GN=Orc5 PE=4 SV=1	PF14630/6.6E-54/Origin recognition complex (ORC) subunit 5 C-terminus	biological_process:GO:0006260//DNA replication;cellular_component:GO:0000808//origin recognition complex;GO:0005634//nucleus;
RHS04664	NA	NA	NA	NA	A0A369J881/0.0/A0A369J881_HYPMA Uncharacterized protein OS=Hypsizygus marmoreus OX=39966 GN=Hypma_002848 PE=4 SV=1	PF12660/1.7E-5/Putative zinc-finger of transcription factor IIIC complex	NA
RHS04665	XP_005823770.1/3.52002e-21/hypothetical protein GUITHDRAFT_89929 [Guillardia theta CCMP2712] &gt;EKX36790.1 hypothetical protein GUITHDRAFT_89929 [Guillardia theta CCMP2712]	Q95VF7/8e-32/PRO1B_ACACA Profilin-1B OS=Acanthamoeba castellanii OX=5755 PE=1 SV=3	nsy:104231500/1e-20/profilin-2-like; K05759 profilin	YOR122c/9e-28/[Z] KOG1755 Profilin	A0A067TJT8/2e-51/A0A067TJT8_GALM3 Profilin OS=Galerina marginata (strain CBS 339.88) OX=685588 GN=GALMADRAFT_223484 PE=3 SV=1	PR00392/3.0E-8/Profilin signature	cellular_component:GO:0005856//cytoskeleton;molecular_function:GO:0003779//actin binding;
RHS04666	NA	NA	NA	NA	A0A0C9XB40/2e-17/A0A0C9XB40_9AGAR Unplaced genomic scaffold K443scaffold_238, whole genome shotgun sequence OS=Laccaria amethystina LaAM-08-1 OX=1095629 GN=K443DRAFT_683374 PE=4 SV=1	NA	NA
RHS04667	CCI48892.1/3.66705e-54/unnamed protein product [Albugo candida]	O74400/2e-53/YOCE_SCHPO Uncharacterized RNA-binding protein C4F6.14 OS=Schizosaccharomyces pombe (strain 972 / ATCC 24843) OX=284812 GN=SPBC4F6.14 PE=1 SV=1	obr:102715932/8e-46/RNA-binding protein 28; K14573 nucleolar protein 4	SPBC4F6.14/7e-54/[A] KOG0127 Nucleolar protein fibrillarin NOP77 (RRM superfamily)	A0A067T7X2/0.0/A0A067T7X2_GALM3 Uncharacterized protein OS=Galerina marginata (strain CBS 339.88) OX=685588 GN=GALMADRAFT_243166 PE=4 SV=1	PS50102/14.471/Eukaryotic RNA Recognition Motif (RRM) profile.	molecular_function:GO:0003723//RNA binding;
RHS04668	XP_009036901.1/4.96874e-21/hypothetical protein AURANDRAFT_13446, partial [Aureococcus anophagefferens] &gt;EGB08166.1 hypothetical protein AURANDRAFT_13446, partial [Aureococcus anophagefferens]	Q8NIL3/5e-15/AES1_SCHPO Antisense-enhancing sequence 1 OS=Schizosaccharomyces pombe (strain 972 / ATCC 24843) OX=284812 GN=aes1 PE=3 SV=1	NA	YHR029c/2e-14/[R] KOG3033 Predicted PhzC/PhzF-type epimerase	A0A0L6X3H0/1e-125/A0A0L6X3H0_9AGAR Uncharacterized protein OS=Termitomyces sp. J132 OX=1306850 GN=J132_07717 PE=4 SV=1	PF02567/3.9E-40/Phenazine biosynthesis-like protein	biological_process:GO:0009058//biosynthetic process;molecular_function:GO:0003824//catalytic activity;
RHS04669	XP_004253342.1/0/PREDICTED: DNA replication ATP-dependent helicase/nuclease DNA2-like [Solanum lycopersicum]	Q8QHA5/0.0/DNA2_XENLA DNA replication ATP-dependent helicase/nuclease DNA2 OS=Xenopus laevis OX=8355 GN=dna2 PE=1 SV=1	sly:101247601/0.0/DNA replication ATP-dependent helicase/nuclease DNA2-like; K10742 DNA replication ATP-dependent helicase Dna2 [EC:3.6.4.12]	SPBC16D10.04c/0.0/[L] KOG1805 DNA replication helicase	A0A369K569/0.0/A0A369K569_HYPMA DNA replication ATP-dependent helicase/nuclease dna2 OS=Hypsizygus marmoreus OX=39966 GN=dna2 PE=4 SV=1	PF13086/1.5E-16/AAA domain	biological_process:GO:0033567//DNA replication, Okazaki fragment processing;molecular_function:GO:0017108//5'-flap endonuclease activity;GO:0004386//helicase activity;GO:0043142//single-stranded DNA-dependent ATPase activity;
RHS04670	XP_002960444.1/6.24311e-35/hypothetical protein SELMODRAFT_73523 [Selaginella moellendorffii] &gt;EFJ37983.1 hypothetical protein SELMODRAFT_73523 [Selaginella moellendorffii]	O13716/5e-71/AGN1_SCHPO Glucan endo-1,3-alpha-glucosidase agn1 OS=Schizosaccharomyces pombe (strain 972 / ATCC 24843) OX=284812 GN=agn1 PE=1 SV=2	smo:SELMODRAFT_73523/1e-35/hypothetical protein; K08254 glucan endo-1,3-alpha-glucosidase [EC:3.2.1.59]	NA	A0A2A9NVD8/7e-178/A0A2A9NVD8_9AGAR Glycoside hydrolase family 71 protein OS=Amanita thiersii Skay4041 OX=703135 GN=AMATHDRAFT_74814 PE=4 SV=1	PF03659/2.7E-115/Glycosyl hydrolase family 71	molecular_function:GO:0016787//hydrolase activity;
RHS04671	XP_001762389.1/2.0028e-121/predicted protein [Physcomitrella patens] &gt;EDQ72856.1 predicted protein [Physcomitrella patens]	O42939/4e-144/UBA2_SCHPO Ubiquitin-activating enzyme E1-like OS=Schizosaccharomyces pombe (strain 972 / ATCC 24843) OX=284812 GN=uba2 PE=1 SV=1	ppp:112278370/3e-123/SUMO-activating enzyme subunit 2-like; K10685 ubiquitin-like 1-activating enzyme E1 B [EC:6.2.1.45]	SPBC16H5.03c/2e-144/[O] KOG2013 SMT3/SUMO-activating complex, catalytic component UBA2	A8NN69/0.0/A8NN69_COPC7 Uba2 OS=Coprinopsis cinerea (strain Okayama-7 / 130 / ATCC MYA-4618 / FGSC 9003) OX=240176 GN=CC1G_06462 PE=4 SV=1	PF10585/5.8E-9/Ubiquitin-activating enzyme active site	biological_process:GO:0016925//protein sumoylation;cellular_component:GO:0005737//cytoplasm;molecular_function:GO:0046872//metal ion binding;GO:0005524//ATP binding;GO:0019948//SUMO activating enzyme activity;
RHS04672	XP_005835579.1/3.32104e-51/hypothetical protein GUITHDRAFT_159492 [Guillardia theta CCMP2712] &gt;EKX48599.1 hypothetical protein GUITHDRAFT_159492 [Guillardia theta CCMP2712]	O13848/7e-52/I3ACR_SCHPO NAD/NADP-dependent indole-3-acetaldehyde reductase OS=Schizosaccharomyces pombe (strain 972 / ATCC 24843) OX=284812 GN=SPAC19G12.09 PE=1 SV=1	dzi:111288317/2e-47/aldo-keto reductase family 4 member C10-like isoform X1; K00002 alcohol dehydrogenase (NADP+) [EC:1.1.1.2]	SPAC19G12.09/3e-52/[R] KOG1577 Aldo/keto reductase family proteins	A0A409W3M7/5e-143/A0A409W3M7_9AGAR Uncharacterized protein OS=Panaeolus cyanescens OX=181874 GN=CVT24_009133 PE=4 SV=1	PR00069/4.5E-30/Aldo-keto reductase signature	molecular_function:GO:0016491//oxidoreductase activity;
RHS04673	KZM98600.1/3.95743e-30/hypothetical protein DCAR_014038 [Daucus carota subsp. sativus]	Q6NXW6/1e-46/RAD17_MOUSE Cell cycle checkpoint protein RAD17 OS=Mus musculus OX=10090 GN=Rad17 PE=1 SV=2	dcr:108216218/1e-30/cell cycle checkpoint protein RAD17; K06662 cell cycle checkpoint protein	Hs4506383/1e-45/[DL] KOG1970 Checkpoint RAD17-RFC complex, RAD17/RAD24 component	A0A067SGZ0/0.0/A0A067SGZ0_GALM3 Uncharacterized protein OS=Galerina marginata (strain CBS 339.88) OX=685588 GN=GALMADRAFT_255090 PE=4 SV=1	PF03215/3.9E-58/Rad17 cell cycle checkpoint protein	NA
RHS04674	NA	NA	NA	NA	F8NJB8/4e-08/F8NJB8_SERL9 Uncharacterized protein OS=Serpula lacrymans var. lacrymans (strain S7.9) OX=578457 GN=SERLADRAFT_458104 PE=4 SV=1	NA	NA
RHS04675	NA	NA	NA	NA	NA	NA	NA
RHS04676	XP_011656367.1/1.1942e-09/PREDICTED: GDSL esterase/lipase At4g01130 [Cucumis sativus] &gt;KGN45708.1 hypothetical protein Csa_6G007420 [Cucumis sativus]	A7J2C6/1e-35/AES1_HYPJE Acetylesterase OS=Hypocrea jecorina OX=51453 GN=aes1 PE=1 SV=1	NA	At3g50400/4e-08/[RI] LSE0388 A Predicted lipase	A0A409WZM0/2e-172/A0A409WZM0_PSICY Uncharacterized protein OS=Psilocybe cyanescens OX=93625 GN=CVT25_000664 PE=4 SV=1	PF00657/9.6E-11/GDSL-like Lipase/Acylhydrolase	molecular_function:GO:0016788//hydrolase activity, acting on ester bonds;
RHS04677	XP_013590409.1/1.35845e-09/PREDICTED: GDSL esterase/lipase At3g50400 [Brassica oleracea var. oleracea]	A7J2C6/3e-34/AES1_HYPJE Acetylesterase OS=Hypocrea jecorina OX=51453 GN=aes1 PE=1 SV=1	NA	At3g50400/2e-10/[RI] LSE0388 A Predicted lipase	A0A0C9W4B8/8e-165/A0A0C9W4B8_9AGAM Unplaced genomic scaffold SPHSTscaffold_29, whole genome shotgun sequence OS=Sphaerobolus stellatus SS14 OX=990650 GN=M422DRAFT_164380 PE=4 SV=1	PF00657/1.1E-9/GDSL-like Lipase/Acylhydrolase	molecular_function:GO:0016788//hydrolase activity, acting on ester bonds;
RHS04678	NA	NA	NA	NA	A0A369KCS2/1e-88/A0A369KCS2_HYPMA Uncharacterized protein OS=Hypsizygus marmoreus OX=39966 GN=Hypma_005980 PE=4 SV=1	NA	NA
RHS04679	XP_009519892.1/1.0483e-26/hypothetical protein PHYSODRAFT_554712 [Phytophthora sojae] &gt;EGZ24604.1 hypothetical protein PHYSODRAFT_554712 [Phytophthora sojae]	Q2HDQ7/2e-34/PSF1_CHAGB DNA replication complex GINS protein PSF1 OS=Chaetomium globosum (strain ATCC 6205 / CBS 148.51 / DSM 1962 / NBRC 6347 / NRRL 1970) OX=306901 GN=PSF1 PE=3 SV=1	peq:110018882/6e-19/DNA replication complex GINS protein PSF1 isoform X1; K10732 GINS complex subunit 1	YDR013w/1e-28/[L] KOG3303 Predicted alpha-helical protein, potentially involved in replication/repair	A0A0C3CHP8/2e-114/A0A0C3CHP8_HEBCY Uncharacterized protein OS=Hebeloma cylindrosporum h7 OX=686832 GN=M413DRAFT_18253 PE=4 SV=1	NA	biological_process:GO:0006260//DNA replication;GO:1902983//DNA strand elongation involved in mitotic DNA replication;cellular_component:GO:0000811//GINS complex;molecular_function:GO:0043138//3'-5' DNA helicase activity;
RHS04680	NA	NA	NA	NA	A0A067SJL7/3e-51/A0A067SJL7_GALM3 Uncharacterized protein OS=Galerina marginata (strain CBS 339.88) OX=685588 GN=GALMADRAFT_144892 PE=4 SV=1	PF08528/4.9E-9/Whi5 like	NA
RHS04681	XP_005535797.1/1.20283e-47/3-hydroxyanthranilate 3,4-dioxygenase [Cyanidioschyzon merolae strain 10D] &gt;BAM79511.1 3-hydroxyanthranilate 3,4-dioxygenase [Cyanidioschyzon merolae strain 10D]	Q2UB88/1e-82/3HAO2_ASPOR 3-hydroxyanthranilate 3,4-dioxygenase 2 OS=Aspergillus oryzae (strain ATCC 42149 / RIB 40) OX=510516 GN=bna1-2 PE=3 SV=1	cme:CYME_CMF152C/2e-48/3-hydroxyanthranilate 3,4-dioxygenase; K00452 3-hydroxyanthranilate 3,4-dioxygenase [EC:1.13.11.6]	YJR025c/1e-56/[E] KOG3995 3-hydroxyanthranilate oxygenase HAAO	A0A0C9XHX4/2e-111/A0A0C9XHX4_9AGAR 3-hydroxyanthranilate 3,4-dioxygenase OS=Laccaria amethystina LaAM-08-1 OX=1095629 GN=BNA1 PE=3 SV=1	TIGR03037/2.8E-55/anthran_nbaC: 3-hydroxyanthranilate 3,4-dioxygenase	biological_process:GO:0043420//anthranilate metabolic process;GO:0034354//'de novo' NAD biosynthetic process from tryptophan;GO:0006569//tryptophan catabolic process;GO:0019805//quinolinate biosynthetic process;cellular_component:GO:0005737//cytoplasm;molecular_function:GO:0000334//3-hydroxyanthranilate 3,4-dioxygenase activity;GO:0005506//iron ion binding;GO:0008198//ferrous iron binding;
RHS04682	NA	P17576/2e-24/CARP_IRPLA Polyporopepsin OS=Irpex lacteus OX=5319 PE=1 SV=1	NA	NA	A0A369KG14/3e-112/A0A369KG14_HYPMA Uncharacterized protein OS=Hypsizygus marmoreus OX=39966 GN=Hypma_005945 PE=4 SV=1	NA	NA
RHS04683	NA	P0CT89/4e-09/OMT1_PHACR 4-O-methyltransferase 1 OS=Phanerochaete chrysosporium (strain RP-78 / ATCC MYA-4764 / FGSC 9002) OX=273507 GN=fgenesh1_kg.2_#_1379_#_Locus12621v1rpkm4.09 PE=1 SV=1	NA	NA	B0DGL0/1e-61/B0DGL0_LACBS O-methyltransferase OS=Laccaria bicolor (strain S238N-H82 / ATCC MYA-4686) OX=486041 GN=LACBIDRAFT_300368 PE=4 SV=1	NA	NA
RHS04684	NA	P0CT89/8e-24/OMT1_PHACR 4-O-methyltransferase 1 OS=Phanerochaete chrysosporium (strain RP-78 / ATCC MYA-4764 / FGSC 9002) OX=273507 GN=fgenesh1_kg.2_#_1379_#_Locus12621v1rpkm4.09 PE=1 SV=1	NA	NA	A0A409YEA4/2e-99/A0A409YEA4_9AGAR Uncharacterized protein OS=Panaeolus cyanescens OX=181874 GN=CVT24_006347 PE=4 SV=1	NA	NA
RHS04685	NA	NA	NA	NA	A0A2A9NMV8/2e-29/A0A2A9NMV8_9AGAR Uncharacterized protein (Fragment) OS=Amanita thiersii Skay4041 OX=703135 GN=AMATHDRAFT_147283 PE=3 SV=1	NA	NA
RHS04686	XP_009351296.1/1.99131e-151/PREDICTED: serine/threonine-protein phosphatase 2B catalytic subunit alpha isoform-like [Pyrus x bretschneideri]	P48457/2e-168/PP2B_EMENI Serine/threonine-protein phosphatase 2B catalytic subunit OS=Emericella nidulans (strain FGSC A4 / ATCC 38163 / CBS 112.46 / NRRL 194 / M139) OX=227321 GN=cnaA PE=3 SV=3	pxb:103942823/4e-152/serine/threonine-protein phosphatase 2B catalytic subunit alpha isoform-like; K04348 serine/threonine-protein phosphatase 2B catalytic subunit [EC:3.1.3.16]	SPBC1346.01c/9e-168/[R] KOG0375 Serine-threonine phosphatase 2B, catalytic subunit	A0A409XQQ1/0.0/A0A409XQQ1_PSICY Serine/threonine-protein phosphatase OS=Psilocybe cyanescens OX=93625 GN=CVT25_003664 PE=3 SV=1	PF00149/3.1E-27/Calcineurin-like phosphoesterase	cellular_component:GO:0016021//integral component of membrane;molecular_function:GO:0005509//calcium ion binding;GO:0004721//phosphoprotein phosphatase activity;GO:0005507//copper ion binding;GO:0016491//oxidoreductase activity;
RHS04687	BAJ98151.1/0/predicted protein [Hordeum vulgare subsp. vulgare]	P78586/0.0/ARG56_CANAX Protein ARG5,6, mitochondrial OS=Candida albicans OX=5476 GN=ARG5,6 PE=3 SV=1	cmos:111451291/7e-33/probable N-acetyl-gamma-glutamyl-phosphate reductase, chloroplastic; K00145 N-acetyl-gamma-glutamyl-phosphate reductase [EC:1.2.1.38]	YER069w_1/5e-176/[E] KOG2436 Acetylglutamate kinase/acetylglutamate synthase	B0CV29/0.0/B0CV29_LACBS Acetylglutamate kinase ARG6 OS=Laccaria bicolor (strain S238N-H82 / ATCC MYA-4686) OX=486041 GN=LACBIDRAFT_188456 PE=3 SV=1	TIGR00761/2.2E-61/argB: acetylglutamate kinase	biological_process:GO:0006526//arginine biosynthetic process;cellular_component:GO:0005737//cytoplasm;molecular_function:GO:0003942//N-acetyl-gamma-glutamyl-phosphate reductase activity;GO:0003991//acetylglutamate kinase activity;GO:0051287//NAD binding;GO:0046983//protein dimerization activity;
RHS04688	NA	NA	NA	NA	A0A1Y2ICH5/3e-11/A0A1Y2ICH5_PYCCO Uncharacterized protein OS=Trametes coccinea BRFM310 OX=1353009 GN=PYCCODRAFT_903408 PE=4 SV=1	NA	NA
RHS04689	XP_005702968.1/9.88253e-57/hydrolase [Galdieria sulphuraria] &gt;EME26448.1 hydrolase [Galdieria sulphuraria]	P54069/4e-78/BEM46_SCHPO Protein bem46 OS=Schizosaccharomyces pombe (strain 972 / ATCC 24843) OX=284812 GN=bem46 PE=2 SV=3	gsl:Gasu_59350/2e-57/hydrolase; K06889 uncharacterized protein	SPBC32H8.03/2e-78/[R] KOG4391 Predicted alpha/beta hydrolase BEM46	A0A0C9X3V5/0.0/A0A0C9X3V5_9AGAR Unplaced genomic scaffold K443scaffold_204, whole genome shotgun sequence OS=Laccaria amethystina LaAM-08-1 OX=1095629 GN=K443DRAFT_108120 PE=4 SV=1	PF12146/5.5E-11/Serine aminopeptidase, S33	cellular_component:GO:0016021//integral component of membrane;molecular_function:GO:0016787//hydrolase activity;GO:0008236//serine-type peptidase activity;
RHS04690	NA	NA	NA	NA	A0A369KG09/0.0/A0A369KG09_HYPMA Uncharacterized protein OS=Hypsizygus marmoreus OX=39966 GN=Hypma_013930 PE=4 SV=1	NA	NA
RHS07087	XP_002537027.2/1.60443e-127/PREDICTED: uncharacterized protein LOC8270168, partial [Ricinus communis]	NA	NA	NA	A0A067TEK9/0.0/A0A067TEK9_GALM3 Uncharacterized protein OS=Galerina marginata (strain CBS 339.88) OX=685588 GN=GALMADRAFT_138431 PE=4 SV=1	PF15979/1.3E-130/Glycosyl hydrolase family 115	NA
RHS07088	NA	NA	NA	NA	A0A409WPB4/7e-63/A0A409WPB4_PSICY Uncharacterized protein OS=Psilocybe cyanescens OX=93625 GN=CVT25_003637 PE=4 SV=1	NA	NA
RHS07089	NA	NA	NA	NA	NA	NA	NA
RHS07090	OSX79492.1/1.21172e-47/hypothetical protein BU14_0076s0048 [Porphyra umbilicalis]	B0D4E6/0.0/CHO2_LACBS Phosphatidylethanolamine N-methyltransferase OS=Laccaria bicolor (strain S238N-H82 / ATCC MYA-4686) OX=486041 GN=CHO2 PE=3 SV=1	ccp:CHC_T00009414001/1e-46/Phosphatidylethanolamine N-methyltransferase; K16369 phosphatidylethanolamine N-methyltransferase [EC:2.1.1.17]	NA	A0A0C9XZK3/0.0/A0A0C9XZK3_9AGAR Phosphatidylethanolamine N-methyltransferase OS=Laccaria amethystina LaAM-08-1 OX=1095629 GN=K443DRAFT_673663 PE=3 SV=1	PS51598/310.701/Phosphatidylethanolamine N-methyltransferase (EC 2.1.1.17) family profile.	biological_process:GO:0006644//phospholipid metabolic process;cellular_component:GO:0016021//integral component of membrane;molecular_function:GO:0004608//phosphatidylethanolamine N-methyltransferase activity;GO:0008168//methyltransferase activity;
RHS07091	XP_009535816.1/1.50033e-173/hypothetical protein PHYSODRAFT_355945 [Phytophthora sojae] &gt;EGZ09183.1 hypothetical protein PHYSODRAFT_355945 [Phytophthora sojae]	Q9P7L5/0.0/OAT_SCHPO Ornithine aminotransferase car2 OS=Schizosaccharomyces pombe (strain 972 / ATCC 24843) OX=284812 GN=car2 PE=2 SV=1	peq:110038234/1e-173/ornithine aminotransferase, mitochondrial; K00819 ornithine--oxo-acid transaminase [EC:2.6.1.13]	SPBC21C3.08c/0.0/[E] KOG1402 Ornithine aminotransferase	B0D759/0.0/B0D759_LACBS Ornithine aminotransferase OS=Laccaria bicolor (strain S238N-H82 / ATCC MYA-4686) OX=486041 GN=LACBIDRAFT_184382 PE=3 SV=1	PF00202/1.7E-115/Aminotransferase class-III	molecular_function:GO:0042802//identical protein binding;GO:0004587//ornithine-oxo-acid transaminase activity;GO:0030170//pyridoxal phosphate binding;
RHS07092	XP_010037361.1/6.99757e-21/PREDICTED: probable protein S-acyltransferase 7 [Eucalyptus grandis] &gt;KCW49069.1 hypothetical protein EUGRSUZ_K02669 [Eucalyptus grandis]	P59267/2e-20/ZDHC2_MOUSE Palmitoyltransferase ZDHHC2 OS=Mus musculus OX=10090 GN=Zdhhc2 PE=2 SV=1	egr:104426111/1e-21/probable protein S-acyltransferase 7; K16675 palmitoyltransferase ZDHHC9/14/18 [EC:2.3.1.225]	7297775/1e-21/[R] KOG1311 DHHC-type Zn-finger proteins	A0A0C9XBP8/1e-155/A0A0C9XBP8_9AGAR Palmitoyltransferase OS=Laccaria amethystina LaAM-08-1 OX=1095629 GN=K443DRAFT_393861 PE=3 SV=1	PF01529/2.5E-33/DHHC palmitoyltransferase	cellular_component:GO:0016021//integral component of membrane;molecular_function:GO:0019706//protein-cysteine S-palmitoyltransferase activity;
RHS07093	NA	NA	NA	NA	A0A0D2P8E9/6e-30/A0A0D2P8E9_9AGAR Uncharacterized protein OS=Hypholoma sublateritium FD-334 SS-4 OX=945553 GN=HYPSUDRAFT_135500 PE=4 SV=1	NA	NA
RHS07094	NA	NA	NA	NA	A0A369J861/1e-91/A0A369J861_HYPMA Uncharacterized protein OS=Hypsizygus marmoreus OX=39966 GN=Hypma_001041 PE=4 SV=1	NA	NA
RHS07095	NA	NA	NA	NA	A0A409YQZ1/4e-108/A0A409YQZ1_9AGAR Uncharacterized protein OS=Gymnopilus dilepis OX=231916 GN=CVT26_011306 PE=4 SV=1	NA	NA
RHS07096	XP_009363356.1/5.1634e-40/PREDICTED: DCN1-like protein 2 [Pyrus x bretschneideri]	Q4PF67/5e-48/DCN1_USTMA Defective in cullin neddylation protein 1 OS=Ustilago maydis (strain 521 / FGSC 9021) OX=237631 GN=DCN1 PE=3 SV=1	pxb:103953336/1e-40/DCN1-like protein 2; K17822 DCN1-like protein 1/2	At3g12760/6e-37/[S] KOG3077 Uncharacterized conserved protein	A0A369J6Q4/5e-127/A0A369J6Q4_HYPMA Defective in cullin neddylation protein OS=Hypsizygus marmoreus OX=39966 GN=DCN1 PE=4 SV=1	PF14555/4.3E-6/UBA-like domain	biological_process:GO:0045116//protein neddylation;GO:0051443//positive regulation of ubiquitin-protein transferase activity;cellular_component:GO:0000151//ubiquitin ligase complex;molecular_function:GO:0032182//ubiquitin-like protein binding;GO:0097602//cullin family protein binding;GO:0031624//ubiquitin conjugating enzyme binding;
RHS07097	NA	NA	NA	NA	A0A369JDJ6/2e-126/A0A369JDJ6_HYPMA Uncharacterized protein OS=Hypsizygus marmoreus OX=39966 GN=Hypma_001223 PE=4 SV=1	NA	NA
RHS07098	ABR17936.1/7.02684e-53/unknown [Picea sitchensis]	P39932/4e-60/STL1_YEAST Sugar transporter STL1 OS=Saccharomyces cerevisiae (strain ATCC 204508 / S288c) OX=559292 GN=STL1 PE=1 SV=2	lsv:111894522/3e-38/sugar transporter ERD6-like 5 isoform X1; K08145 MFS transporter, SP family, solute carrier family 2 (facilitated glucose transporter), member 8	Hs5902090/4e-21/[G] KOG0569 Permease of the major facilitator superfamily	A0A2A9NQX7/0.0/A0A2A9NQX7_9AGAR Uncharacterized protein OS=Amanita thiersii Skay4041 OX=703135 GN=AMATHDRAFT_145891 PE=3 SV=1	PF00083/1.8E-80/Sugar (and other) transporter	biological_process:GO:0008643//carbohydrate transport;cellular_component:GO:0016021//integral component of membrane;
RHS07099	XP_002960444.1/7.19458e-25/hypothetical protein SELMODRAFT_73523 [Selaginella moellendorffii] &gt;EFJ37983.1 hypothetical protein SELMODRAFT_73523 [Selaginella moellendorffii]	O13716/2e-68/AGN1_SCHPO Glucan endo-1,3-alpha-glucosidase agn1 OS=Schizosaccharomyces pombe (strain 972 / ATCC 24843) OX=284812 GN=agn1 PE=1 SV=2	smo:SELMODRAFT_73523/1e-25/hypothetical protein; K08254 glucan endo-1,3-alpha-glucosidase [EC:3.2.1.59]	Hs14755576/2e-10/[GO] KOG4157 beta-1,6-N-acetylglucosaminyltransferase, contains WSC domain	A0A0D2Q022/0.0/A0A0D2Q022_9AGAR Glycoside hydrolase family 71 protein OS=Hypholoma sublateritium FD-334 SS-4 OX=945553 GN=HYPSUDRAFT_183265 PE=4 SV=1	PF01822/3.4E-16/WSC domain	molecular_function:GO:0016787//hydrolase activity;
RHS07100	XP_005707005.1/1.54073e-25/lupus La protein [Galdieria sulphuraria] &gt;EME30485.1 lupus La protein [Galdieria sulphuraria]	P87058/1e-42/LAH1_SCHPO La protein homolog OS=Schizosaccharomyces pombe (strain 972 / ATCC 24843) OX=284812 GN=sla1 PE=1 SV=1	gsl:Gasu_21590/3e-26/lupus La protein; K11090 lupus La protein	SPAC57A10.10c/6e-43/[R] KOG0118 FOG: RRM domain	A0A137QZ05/0.0/A0A137QZ05_9AGAR Uncharacterized protein OS=Leucoagaricus sp. SymC.cos OX=1714833 GN=AN958_05403 PE=4 SV=1	PF08777/3.2E-5/RNA binding motif	biological_process:GO:0006396//RNA processing;cellular_component:GO:0005634//nucleus;GO:0030529//intracellular ribonucleoprotein complex;molecular_function:GO:0003723//RNA binding;
RHS07101	NA	A2QEQ6/2e-12/GUS79_ASPNC Beta-glucuronidase OS=Aspergillus niger (strain CBS 513.88 / FGSC A1513) OX=425011 GN=An02g11890 PE=1 SV=1	NA	NA	B0D764/0.0/B0D764_LACBS Glycoside hydrolase family 79 protein OS=Laccaria bicolor (strain S238N-H82 / ATCC MYA-4686) OX=486041 GN=LACBIDRAFT_234055 PE=4 SV=1	PF16862/1.9E-16/Glycosyl hydrolase family 79 C-terminal beta domain	NA
RHS07102	OIW06956.1/4.41822e-60/hypothetical protein TanjilG_18344 [Lupinus angustifolius]	P36029/2e-52/TPO5_YEAST Polyamine transporter TPO5 OS=Saccharomyces cerevisiae (strain ATCC 204508 / S288c) OX=559292 GN=TPO5 PE=1 SV=1	aly:ARALYDRAFT_915801/3e-06/hypothetical protein; K13863 solute carrier family 7 (cationic amino acid transporter), member 1	YKL174c/1e-52/[E] KOG1289 Amino acid transporters	A0A067TGX7/0.0/A0A067TGX7_GALM3 Uncharacterized protein OS=Galerina marginata (strain CBS 339.88) OX=685588 GN=GALMADRAFT_65411 PE=4 SV=1	PF13520/1.4E-37/Amino acid permease	cellular_component:GO:0016021//integral component of membrane;molecular_function:GO:0015171//amino acid transmembrane transporter activity;
RHS07103	NA	NA	NA	NA	A0A0C9XSR0/3e-13/A0A0C9XSR0_9AGAR Unplaced genomic scaffold K443scaffold_83, whole genome shotgun sequence OS=Laccaria amethystina LaAM-08-1 OX=1095629 GN=K443DRAFT_678908 PE=4 SV=1	NA	NA
RHS07104	XP_021984481.1/8.98498e-93/ubiquitin carboxyl-terminal hydrolase 7-like [Helianthus annuus] &gt;OTG16891.1 putative ubiquitin specific protease domain protein [Helianthus annuus]	Q92353/9e-120/UBP6_SCHPO Ubiquitin carboxyl-terminal hydrolase 6 OS=Schizosaccharomyces pombe (strain 972 / ATCC 24843) OX=284812 GN=ubp6 PE=1 SV=2	obr:102707906/2e-94/ubiquitin carboxyl-terminal hydrolase 6; K11843 ubiquitin carboxyl-terminal hydrolase 14 [EC:3.4.19.12]	SPAC6G9.08/3e-120/[O] KOG1872 Ubiquitin-specific protease	A0A137QDA0/0.0/A0A137QDA0_9AGAR Ubiquitin carboxyl-terminal hydrolase OS=Leucoagaricus sp. SymC.cos OX=1714833 GN=AN958_11522 PE=3 SV=1	PF00240/3.7E-7/Ubiquitin family	NA
RHS07105	OSX78618.1/1.94709e-06/hypothetical protein BU14_0105s0036 [Porphyra umbilicalis]	O14290/8e-29/YF14_SCHPO Uncharacterized protein C9E9.04 OS=Schizosaccharomyces pombe (strain 972 / ATCC 24843) OX=284812 GN=SPAC9E9.04 PE=4 SV=1	NA	SPAC9E9.04/4e-29/[V] KOG1962 B-cell receptor-associated protein and related proteins	A0A369JM85/3e-115/A0A369JM85_HYPMA Uncharacterized protein C9E9.04 OS=Hypsizygus marmoreus OX=39966 GN=SPAC9E9.04 PE=4 SV=1	PF05529/2.2E-52/B-cell receptor-associated protein 31-like	NA
RHS07106	NA	NA	NA	NA	A0A067PEV9/1e-33/A0A067PEV9_9AGAM Uncharacterized protein OS=Jaapia argillacea MUCL 33604 OX=933084 GN=JAAARDRAFT_42799 PE=4 SV=1	NA	NA
RHS07107	NA	NA	NA	NA	A0A067PEV9/3e-58/A0A067PEV9_9AGAM Uncharacterized protein OS=Jaapia argillacea MUCL 33604 OX=933084 GN=JAAARDRAFT_42799 PE=4 SV=1	NA	NA
RHS07108	NA	NA	NA	NA	NA	NA	NA
RHS07109	XP_008466450.1/4.55497e-34/PREDICTED: serine/threonine-protein kinase STY46-like isoform X4 [Cucumis melo]	Q54I36/2e-32/PYK3_DICDI Dual specificity protein kinase pyk3 OS=Dictyostelium discoideum OX=44689 GN=pyk3 PE=1 SV=1	cpep:111789352/1e-36/serine/threonine-protein kinase STY8-like isoform X1; K17535 serine/threonine-protein kinase TNNI3K [EC:2.7.11.1]	At1g04700_2/2e-34/[T] KOG0192 Tyrosine kinase specific for activated (GTP-bound) p21cdc42Hs	A0A0C9XXB2/0.0/A0A0C9XXB2_9AGAR Unplaced genomic scaffold K443scaffold_3, whole genome shotgun sequence OS=Laccaria amethystina LaAM-08-1 OX=1095629 GN=K443DRAFT_391850 PE=4 SV=1	PF07714/7.3E-52/Protein tyrosine kinase	molecular_function:GO:0005524//ATP binding;GO:0004672//protein kinase activity;
RHS07110	NA	NA	NA	NA	A0A067PEV9/6e-41/A0A067PEV9_9AGAM Uncharacterized protein OS=Jaapia argillacea MUCL 33604 OX=933084 GN=JAAARDRAFT_42799 PE=4 SV=1	NA	NA
RHS07111	NA	P07866/4e-13/LTE1_YEAST Guanine nucleotide exchange factor LTE1 OS=Saccharomyces cerevisiae (strain ATCC 204508 / S288c) OX=559292 GN=LTE1 PE=1 SV=2	NA	YAL024c/2e-13/[T] KOG3417 Ras1 guanine nucleotide exchange factor	A0A0C9YGX8/0.0/A0A0C9YGX8_9AGAR Unplaced genomic scaffold K443scaffold_3, whole genome shotgun sequence OS=Laccaria amethystina LaAM-08-1 OX=1095629 GN=K443DRAFT_671509 PE=4 SV=1	PS50009/26.879/Ras guanine-nucleotide exchange factors catalytic domain profile.	NA
RHS07112	XP_012846232.1/1.06233e-53/PREDICTED: probable histone chaperone ASF1A [Erythranthe guttata] &gt;EYU30033.1 hypothetical protein MIMGU_mgv1a014338mg [Erythranthe guttata]	Q4PBU8/5e-72/ASF1_USTMA Histone chaperone ASF1 OS=Ustilago maydis (strain 521 / FGSC 9021) OX=237631 GN=ASF1 PE=3 SV=1	ppp:112276237/6e-54/probable histone chaperone ASF1A; K10753 histone chaperone ASF1	YJL115w/2e-55/[KB] KOG3265 Histone chaperone involved in gene silencing	A0A137QDG4/6e-112/A0A137QDG4_9AGAR Histone chaperone ASF1 OS=Leucoagaricus sp. SymC.cos OX=1714833 GN=AN958_11514 PE=4 SV=1	PF04729/2.1E-64/ASF1 like histone chaperone	biological_process:GO:0006333//chromatin assembly or disassembly;cellular_component:GO:0005634//nucleus;
RHS07113	GAQ88020.1/1.63944e-06/hypothetical protein KFL_003940110 [Klebsormidium nitens]	O42709/1e-18/MCM10_SCHPO DNA replication licensing factor mcm10 OS=Schizosaccharomyces pombe (strain 972 / ATCC 24843) OX=284812 GN=mcm10 PE=1 SV=1	gsl:Gasu_42230/1e-06/minichromosome maintenance protein 1 isoform 1; K10736 minichromosome maintenance protein 10	SPBC1347.10/5e-19/[D] KOG3056 Protein required for S-phase initiation or completion	A0A409WP99/0.0/A0A409WP99_PSICY Uncharacterized protein OS=Psilocybe cyanescens OX=93625 GN=CVT25_003609 PE=4 SV=1	PF09329/1.3E-18/Primase zinc finger	NA
RHS07114	XP_003080039.1/0/from S (ISS) [Ostreococcus tauri] &gt;CAL53687.1 Translation elongation/initiation factor/Ribosomal, beta-barrel [Ostreococcus tauri] &gt;OUS48289.1 hypothetical protein BE221DRAFT_189541 [Ostreococcus tauri]	Q09130/0.0/IF2G_SCHPO Eukaryotic translation initiation factor 2 subunit gamma OS=Schizosaccharomyces pombe (strain 972 / ATCC 24843) OX=284812 GN=tif213 PE=2 SV=1	ota:OT_ostta06g04010/0.0/Translation elongation/initiation factor/Ribosomal, beta-barrel; K03242 translation initiation factor 2 subunit 3	SPBC17G9.09/0.0/[J] KOG0466 Translation initiation factor 2, gamma subunit (eIF-2gamma; GTPase)	A0A2H3K217/0.0/A0A2H3K217_WOLCO Uncharacterized protein OS=Wolfiporia cocos (strain MD-104) OX=742152 GN=WOLCODRAFT_138195 PE=4 SV=1	PR00315/1.1E-8/GTP-binding elongation factor signature	molecular_function:GO:0003743//translation initiation factor activity;GO:0005525//GTP binding;GO:0003924//GTPase activity;
RHS07115	NA	Q6NYK8/1e-12/MARH5_DANRE E3 ubiquitin-protein ligase MARCH5 OS=Danio rerio OX=7955 GN=march5 PE=2 SV=1	NA	7290900/4e-15/[S] KOG3053 Uncharacterized conserved protein	A0A0C9XXA6/0.0/A0A0C9XXA6_9AGAR Unplaced genomic scaffold K443scaffold_3, whole genome shotgun sequence OS=Laccaria amethystina LaAM-08-1 OX=1095629 GN=K443DRAFT_391747 PE=4 SV=1	PF12906/4.6E-5/RING-variant domain	NA
RHS07116	NA	NA	NA	NA	A0A0C2XA11/2e-36/A0A0C2XA11_AMAMU Uncharacterized protein OS=Amanita muscaria Koide BX008 OX=946122 GN=M378DRAFT_154723 PE=4 SV=1	PF11807/1.0E-9/Domain of unknown function (DUF3328)	NA
RHS07117	NA	NA	NA	NA	A0A165RBW2/7e-59/A0A165RBW2_9AGAM Uncharacterized protein OS=Neolentinus lepideus HHB14362 ss-1 OX=1314782 GN=NEOLEDRAFT_1136387 PE=4 SV=1	NA	NA
RHS07118	NA	NA	NA	NA	A0A165RBW8/2e-86/A0A165RBW8_9AGAM Uncharacterized protein OS=Neolentinus lepideus HHB14362 ss-1 OX=1314782 GN=NEOLEDRAFT_1069387 PE=4 SV=1	NA	NA
RHS07119	XP_005761545.1/3.89388e-35/hypothetical protein EMIHUDRAFT_216985 [Emiliania huxleyi CCMP1516] &gt;EOD09116.1 hypothetical protein EMIHUDRAFT_216985 [Emiliania huxleyi CCMP1516]	W7LUF3/1e-23/FUM7_GIBM7 Dehydrogenase FUM7 OS=Gibberella moniliformis (strain M3125 / FGSC 7600) OX=334819 GN=FUM7 PE=2 SV=1	NA	SPAC5H10.06c/1e-23/[C] KOG3857 Alcohol dehydrogenase, class IV	B0D879/0.0/B0D879_LACBS Iron-containing alcohol dehydrogenase OS=Laccaria bicolor (strain S238N-H82 / ATCC MYA-4686) OX=486041 GN=LACBIDRAFT_386226 PE=4 SV=1	PF00465/7.3E-66/Iron-containing alcohol dehydrogenase	molecular_function:GO:0046872//metal ion binding;GO:0016491//oxidoreductase activity;
RHS07120	XP_010517000.1/1.59926e-08/PREDICTED: serine/arginine-rich splicing factor RS2Z33 [Camelina sativa]	Q10193/1e-27/SRP1_SCHPO Pre-mRNA-splicing factor srp1 OS=Schizosaccharomyces pombe (strain 972 / ATCC 24843) OX=284812 GN=srp1 PE=1 SV=3	cpap:110809894/2e-10/serine/arginine-rich splicing factor RS2Z32 isoform X1; K12896 splicing factor, arginine/serine-rich 7	HsM18152777/3e-09/[R] KOG0118 FOG: RRM domain	A0A369JU46/2e-70/A0A369JU46_HYPMA Pre-mRNA-splicing factor srp1 OS=Hypsizygus marmoreus OX=39966 GN=srp1 PE=4 SV=1	PF00076/1.5E-14/RNA recognition motif. (a.k.a. RRM, RBD, or RNP domain)	molecular_function:GO:0003723//RNA binding;GO:0008270//zinc ion binding;
RHS07121	XP_019092956.1/1.41944e-06/PREDICTED: pentatricopeptide repeat-containing protein At3g09060 [Camelina sativa]	NA	cam:101497208/1e-06/pentatricopeptide repeat-containing protein At5g25630-like; K17710 pentatricopeptide repeat domain-containing protein 1	At3g09060/5e-07/[R] KOG4197 FOG: PPR repeat	A0A0C9Y6J8/0.0/A0A0C9Y6J8_9AGAR Unplaced genomic scaffold K443scaffold_3, whole genome shotgun sequence OS=Laccaria amethystina LaAM-08-1 OX=1095629 GN=K443DRAFT_671507 PE=4 SV=1	NA	NA
RHS07122	NA	NA	NA	NA	A0A067T5A7/1e-64/A0A067T5A7_GALM3 Uncharacterized protein OS=Galerina marginata (strain CBS 339.88) OX=685588 GN=GALMADRAFT_278574 PE=4 SV=1	NA	NA
RHS07123	XP_003535436.1/1.45358e-12/PREDICTED: 28 kDa heat- and acid-stable phosphoprotein-like [Glycine max] &gt;KHN32233.1 28 kDa heat- and acid-stable phosphoprotein [Glycine soja]	Q13442/4e-18/HAP28_HUMAN 28 kDa heat- and acid-stable phosphoprotein OS=Homo sapiens OX=9606 GN=PDAP1 PE=1 SV=1	NA	Hs7657441/2e-18/[R] KOG3375 Phosphoprotein/predicted coiled-coil protein	A0A067T7H5/9e-58/A0A067T7H5_GALM3 Uncharacterized protein OS=Galerina marginata (strain CBS 339.88) OX=685588 GN=GALMADRAFT_245433 PE=4 SV=1	PF10252/6.3E-25/Casein kinase substrate phosphoprotein PP28	NA
RHS07124	NP_001238080.1/2.9338e-16/uncharacterized protein LOC100499925 [Glycine max] &gt;ACU14204.1 unknown [Glycine max] &gt;KHN35293.1 NADH dehydrogenase [ubiquinone] 1 alpha subcomplex subunit 6 [Glycine soja] &gt;KRH13331.1 hypothetical protein GLYMA_15G231900 [Glycine max]	P42114/6e-27/NDUA6_NEUCR NADH-ubiquinone oxidoreductase 14.8 kDa subunit OS=Neurospora crassa (strain ATCC 24698 / 74-OR23-1A / CBS 708.71 / DSM 1257 / FGSC 987) OX=367110 GN=nuo14.8 PE=1 SV=3	gmx:100499925/6e-17/uncharacterized protein LOC100499925; K03950 NADH dehydrogenase (ubiquinone) 1 alpha subcomplex subunit 6	Hs4505359/1e-23/[C] KOG3426 NADH:ubiquinone oxidoreductase, NDUFA6/B14 subunit	A0A0D2NFY4/4e-74/A0A0D2NFY4_9AGAR Uncharacterized protein OS=Hypholoma sublateritium FD-334 SS-4 OX=945553 GN=HYPSUDRAFT_145867 PE=3 SV=1	PF05347/2.7E-10/Complex 1 protein (LYR family)	cellular_component:GO:0005739//mitochondrion;
RHS07125	NA	NA	NA	NA	NA	NA	NA
RHS07126	AGZ05742.1/1.55108e-43/MAP1 [Empetrum nigrum]	NA	NA	NA	A0A0C9X5E3/0.0/A0A0C9X5E3_9AGAR Unplaced genomic scaffold K443scaffold_439, whole genome shotgun sequence OS=Laccaria amethystina LaAM-08-1 OX=1095629 GN=K443DRAFT_685764 PE=4 SV=1	NA	NA
RHS07127	XP_005702890.1/1.33531e-17/heat shock protein [Galdieria sulphuraria] &gt;EME26370.1 heat shock protein [Galdieria sulphuraria]	O14368/6e-19/HSP16_SCHPO Heat shock protein 16 OS=Schizosaccharomyces pombe (strain 972 / ATCC 24843) OX=284812 GN=hsp16 PE=1 SV=1	gsl:Gasu_59880/3e-18/heat shock protein; K13993 HSP20 family protein	SPBC3E7.02c/3e-19/[O] KOG0710 Molecular chaperone (small heat-shock protein Hsp26/Hsp42)	D8Q3R3/3e-72/D8Q3R3_SCHCM Uncharacterized protein OS=Schizophyllum commune (strain H4-8 / FGSC 9210) OX=578458 GN=SCHCODRAFT_234587 PE=3 SV=1	PS01031/22.875/Small heat shock protein (sHSP) domain profile.	NA
RHS07128	XP_006827596.1/2.51853e-17/17.8 kDa class I heat shock protein [Amborella trichopoda] &gt;ERM95012.1 hypothetical protein AMTR_s00009p00236890 [Amborella trichopoda]	O14368/2e-17/HSP16_SCHPO Heat shock protein 16 OS=Schizosaccharomyces pombe (strain 972 / ATCC 24843) OX=284812 GN=hsp16 PE=1 SV=1	atr:18422995/5e-18/17.8 kDa class I heat shock protein; K13993 HSP20 family protein	SPBC3E7.02c/9e-18/[O] KOG0710 Molecular chaperone (small heat-shock protein Hsp26/Hsp42)	A0A409XZ04/3e-77/A0A409XZ04_9AGAR Uncharacterized protein OS=Gymnopilus dilepis OX=231916 GN=CVT26_016172 PE=3 SV=1	PS01031/22.364/Small heat shock protein (sHSP) domain profile.	NA
RHS07129	XP_012193961.1/8.06057e-10/hypothetical protein SPRG_00477 [Saprolegnia parasitica CBS 223.65] &gt;KDO35633.1 hypothetical protein SPRG_00477 [Saprolegnia parasitica CBS 223.65]	NA	NA	NA	A0A0C9YNS8/0.0/A0A0C9YNS8_9AGAR Unplaced genomic scaffold K443scaffold_3, whole genome shotgun sequence OS=Laccaria amethystina LaAM-08-1 OX=1095629 GN=K443DRAFT_671561 PE=4 SV=1	PF01636/3.1E-14/Phosphotransferase enzyme family	NA
RHS07130	OMO70582.1/6.25429e-61/FMN-dependent dehydrogenase [Corchorus capsularis]	Q9HDX2/8e-102/YKN3_SCHPO Uncharacterized lactate 2-monooxygenase PB1A11.03 OS=Schizosaccharomyces pombe (strain 972 / ATCC 24843) OX=284812 GN=SPAPB1A11.03 PE=3 SV=1	obr:102711546/4e-62/peroxisomal (S)-2-hydroxy-acid oxidase GLO4-like; K11517 (S)-2-hydroxy-acid oxidase [EC:1.1.3.15]	SPAPB1A11.03/3e-102/[C] KOG0538 Glycolate oxidase	A0A0C9XX44/0.0/A0A0C9XX44_9AGAR Unplaced genomic scaffold K443scaffold_19, whole genome shotgun sequence OS=Laccaria amethystina LaAM-08-1 OX=1095629 GN=K443DRAFT_674480 PE=3 SV=1	PS51349/84.584/FMN-dependent alpha-hydroxy acid dehydrogenase domain profile.	molecular_function:GO:0010181//FMN binding;GO:0016491//oxidoreductase activity;
RHS07131	XP_008895512.1/5.10643e-46/hypothetical protein PPTG_04920 [Phytophthora parasitica INRA-310] &gt;ETI38310.1 hypothetical protein F443_15908 [Phytophthora parasitica P1569] &gt;ETK78549.1 hypothetical protein L915_15462 [Phytophthora parasitica] &gt;ETL31987.1 hypothetical protein L916_15357 [Phytophthora parasitica] &gt;ETL85205.1 hypothetical protein L917_15183 [Phytophthora parasitica] &gt;ETM…	NA	NA	NA	A0A0D2LCK0/6e-134/A0A0D2LCK0_9AGAR Uncharacterized protein OS=Hypholoma sublateritium FD-334 SS-4 OX=945553 GN=HYPSUDRAFT_38379 PE=4 SV=1	PF09362/1.6E-50/Domain of unknown function (DUF1996)	NA
RHS07132	XP_005705806.1/1.00041e-06/transcription initiation factor TFIIE beta subunit [Galdieria sulphuraria] &gt;EME29286.1 transcription initiation factor TFIIE beta subunit [Galdieria sulphuraria]	P79011/6e-43/T2EB_SCHPO Transcription initiation factor IIE subunit beta OS=Schizosaccharomyces pombe (strain 972 / ATCC 24843) OX=284812 GN=tfa2 PE=1 SV=2	gsl:Gasu_32940/2e-07/transcription initiation factor TFIIE beta subunit; K03137 transcription initiation factor TFIIE subunit beta	SPCC1672.08c/3e-43/[K] KOG3095 Transcription initiation factor IIE, beta subunit	A0A369JYZ4/0.0/A0A369JYZ4_HYPMA Transcription initiation factor IIE subunit beta OS=Hypsizygus marmoreus OX=39966 GN=tfa2 PE=3 SV=1	PF02186/3.9E-16/TFIIE beta subunit core domain	NA
RHS07133	XP_005703045.1/6.75143e-60/(S)-2-hydroxy-acid oxidase [Galdieria sulphuraria] &gt;EME26525.1 (S)-2-hydroxy-acid oxidase [Galdieria sulphuraria]	Q9HDX2/2e-89/YKN3_SCHPO Uncharacterized lactate 2-monooxygenase PB1A11.03 OS=Schizosaccharomyces pombe (strain 972 / ATCC 24843) OX=284812 GN=SPAPB1A11.03 PE=3 SV=1	gsl:Gasu_58490/1e-60/(S)-2-hydroxy-acid oxidase; K11517 (S)-2-hydroxy-acid oxidase [EC:1.1.3.15]	SPAPB1A11.03/8e-90/[C] KOG0538 Glycolate oxidase	A0A0C9XX44/0.0/A0A0C9XX44_9AGAR Unplaced genomic scaffold K443scaffold_19, whole genome shotgun sequence OS=Laccaria amethystina LaAM-08-1 OX=1095629 GN=K443DRAFT_674480 PE=3 SV=1	PF01070/9.5E-104/FMN-dependent dehydrogenase	molecular_function:GO:0052852//very-long-chain-(S)-2-hydroxy-acid oxidase activity;GO:0010181//FMN binding;GO:0052854//medium-chain-(S)-2-hydroxy-acid oxidase activity;GO:0052853//long-chain-(S)-2-hydroxy-long-chain-acid oxidase activity;GO:0016491//oxidoreductase activity;
RHS07134	NA	NA	NA	NA	NA	NA	NA
RHS07135	NA	NA	NA	NA	NA	NA	NA
RHS07136	XP_010677210.1/9.29619e-129/PREDICTED: lon protease homolog 2, peroxisomal [Beta vulgaris subsp. vulgaris] &gt;KMT11730.1 hypothetical protein BVRB_5g105660 [Beta vulgaris subsp. vulgaris]	Q6C0L7/0.0/LONP2_YARLI Lon protease homolog 2, peroxisomal OS=Yarrowia lipolytica (strain CLIB 122 / E 150) OX=284591 GN=YALI0F23595g PE=3 SV=1	bvg:104892885/2e-129/lon protease homolog 2, peroxisomal; K01338 ATP-dependent Lon protease [EC:3.4.21.53]	Hs20562018/8e-140/[O] KOG2004 Mitochondrial ATP-dependent protease PIM1/LON	A0A409WPA9/0.0/A0A409WPA9_PSICY Lon protease homolog OS=Psilocybe cyanescens OX=93625 GN=CVT25_003613 PE=3 SV=1	PF05362/1.5E-63/Lon protease (S16) C-terminal proteolytic domain	biological_process:GO:0016560//protein import into peroxisome matrix, docking;GO:0048527//lateral root development;GO:0016485//protein processing;GO:0006625//protein targeting to peroxisome;GO:0006515//protein quality control for misfolded or incompletely synthesized proteins;GO:0040007//growth;cellular_component:GO:0005782//peroxisomal matrix;molecular_function:GO:0004252//serine-type endopeptid…
RHS07137	ETK97266.1/9.05754e-07/hypothetical protein L915_00169 [Phytophthora parasitica]	NA	NA	NA	A0A369JPZ5/0.0/A0A369JPZ5_HYPMA Calcium-binding and coiled-coil domain-containing protein 1 OS=Hypsizygus marmoreus OX=39966 GN=CALCOCO1 PE=4 SV=1	NA	NA
RHS07138	XP_002966978.1/2.96556e-54/hypothetical protein SELMODRAFT_87195 [Selaginella moellendorffii] &gt;EFJ31577.1 hypothetical protein SELMODRAFT_87195 [Selaginella moellendorffii]	D4AS41/8e-57/A7056_ARTBC Uncharacterized FAD-linked oxidoreductase ARB_02478 OS=Arthroderma benhamiae (strain ATCC MYA-4681 / CBS 112371) OX=663331 GN=ARB_07056 PE=1 SV=2	dcr:108195936/4e-12/reticuline oxidase-like protein; K22395 cinnamyl-alcohol dehydrogenase [EC:1.1.1.195]	At5g44400/1e-08/[QG] LSE0347 A Predicted berberine bridge enzyme/FAD-binding oxidoreductase	A0A2H3CFG1/2e-154/A0A2H3CFG1_ARMGA FAD-binding domain-containing protein OS=Armillaria gallica OX=47427 GN=ARMGADRAFT_1020136 PE=3 SV=1	PF08031/5.2E-10/Berberine and berberine like	molecular_function:GO:0016614//oxidoreductase activity, acting on CH-OH group of donors;GO:0050660//flavin adenine dinucleotide binding;
RHS07139	XP_008899586.1/7.62751e-06/hypothetical protein PPTG_07182 [Phytophthora parasitica INRA-310] &gt;ETN14942.1 hypothetical protein PPTG_07182 [Phytophthora parasitica INRA-310]	O59893/5e-13/AXE2_TALPU Acetylxylan esterase 2 OS=Talaromyces purpureogenus OX=1266744 GN=axe-2 PE=1 SV=1	NA	NA	A0A409VYI4/7e-85/A0A409VYI4_9AGAR Uncharacterized protein OS=Panaeolus cyanescens OX=181874 GN=CVT24_012041 PE=4 SV=1	PF01083/1.1E-22/Cutinase	NA
RHS07140	NA	NA	NA	NA	A0A369JWW6/6e-21/A0A369JWW6_HYPMA Uncharacterized protein OS=Hypsizygus marmoreus OX=39966 GN=Hypma_005365 PE=4 SV=1	NA	NA
RHS07141	YP_665646.1/3.22269e-10/ribosomal protein S4 (mitochondrion) [Nephroselmis olivacea] &gt;AAF03172.1 ribosomal protein S4 (mitochondrion) [Nephroselmis olivacea]	O60063/4e-31/NAM9_SCHPO 37S ribosomal protein S4-like, mitochondrial OS=Schizosaccharomyces pombe (strain 972 / ATCC 24843) OX=284812 GN=nam9 PE=2 SV=1	ppp:3989110/1e-09/rps4, PhpafMp11; Ribosomal protein S4; K02986 small subunit ribosomal protein S4	NA	A0A0C9XI21/3e-179/A0A0C9XI21_9AGAR Unplaced genomic scaffold K443scaffold_76, whole genome shotgun sequence OS=Laccaria amethystina LaAM-08-1 OX=1095629 GN=K443DRAFT_678653 PE=4 SV=1	PF01479/7.7E-11/S4 domain	biological_process:GO:0006412//translation;cellular_component:GO:0016021//integral component of membrane;GO:0005739//mitochondrion;GO:0015935//small ribosomal subunit;molecular_function:GO:0003735//structural constituent of ribosome;GO:0019843//rRNA binding;
RHS07142	NA	NA	NA	NA	A0A0L6WK84/4e-65/A0A0L6WK84_9AGAR Uncharacterized protein OS=Termitomyces sp. J132 OX=1306850 GN=J132_00919 PE=4 SV=1	NA	NA
RHS07143	NA	NA	NA	NA	A0A0D2KUF7/7e-99/A0A0D2KUF7_9AGAR Uncharacterized protein OS=Hypholoma sublateritium FD-334 SS-4 OX=945553 GN=HYPSUDRAFT_45430 PE=4 SV=1	NA	NA
RHS07144	NA	NA	NA	NA	A0A067SJN1/6e-08/A0A067SJN1_GALM3 Uncharacterized protein OS=Galerina marginata (strain CBS 339.88) OX=685588 GN=GALMADRAFT_255122 PE=4 SV=1	NA	NA
RHS07145	NA	NA	NA	NA	A0A409VFL5/3e-15/A0A409VFL5_9AGAR Uncharacterized protein OS=Gymnopilus dilepis OX=231916 GN=CVT26_015736 PE=4 SV=1	PF12937/4.7E-6/F-box-like	NA
RHS07146	NA	NA	NA	NA	A0A409XN34/8e-68/A0A409XN34_PSICY Uncharacterized protein OS=Psilocybe cyanescens OX=93625 GN=CVT25_007951 PE=4 SV=1	NA	NA
RHS07147	XP_021801562.1/4.66267e-41/tetraketide alpha-pyrone reductase 1-like [Prunus avium]	Q12068/1e-47/GRE2_YEAST NADPH-dependent methylglyoxal reductase GRE2 OS=Saccharomyces cerevisiae (strain ATCC 204508 / S288c) OX=559292 GN=GRE2 PE=1 SV=1	csat:104771418/5e-36/dihydroflavonol 4-reductase-like; K13082 bifunctional dihydroflavonol 4-reductase/flavanone 4-reductase [EC:1.1.1.219 1.1.1.234]	YDR541c/1e-50/[V] KOG1502 Flavonol reductase/cinnamoyl-CoA reductase	D6RJM8/2e-126/D6RJM8_COPC7 D-lactaldehyde dehydrogenase OS=Coprinopsis cinerea (strain Okayama-7 / 130 / ATCC MYA-4618 / FGSC 9003) OX=240176 GN=CC1G_13567 PE=4 SV=1	PF01370/2.4E-13/NAD dependent epimerase/dehydratase family	molecular_function:GO:0003824//catalytic activity;GO:0050662//coenzyme binding;
RHS07148	XP_008865310.1/5.42249e-53/hypothetical protein H310_03288 [Aphanomyces invadans] &gt;ETW05533.1 hypothetical protein H310_03288 [Aphanomyces invadans]	Q32LL2/2e-29/STML2_BOVIN Stomatin-like protein 2, mitochondrial OS=Bos taurus OX=9913 GN=STOML2 PE=2 SV=1	mng:MNEG_7244/5e-18/hypothetical protein; K13412 calcium-dependent protein kinase [EC:2.7.11.1]	7291688/8e-30/[C] KOG2620 Prohibitins and stomatins of the PID superfamily	A0A0C9X2X0/0.0/A0A0C9X2X0_9AGAR Unplaced genomic scaffold K443scaffold_550, whole genome shotgun sequence OS=Laccaria amethystina LaAM-08-1 OX=1095629 GN=K443DRAFT_686400 PE=4 SV=1	PR00721/5.8E-9/Stomatin signature	cellular_component:GO:0016020//membrane;
RHS07149	OQR97564.1/3.11055e-62/WSC domain protein [Thraustotheca clavata]	NA	NA	NA	A0A369IYH0/0.0/A0A369IYH0_HYPMA Uncharacterized protein OS=Hypsizygus marmoreus OX=39966 GN=Hypma_016212 PE=4 SV=1	PF09362/1.1E-73/Domain of unknown function (DUF1996)	NA
RHS07150	XP_005649277.1/3.78005e-85/hypothetical protein COCSUDRAFT_36053 [Coccomyxa subellipsoidea C-169] &gt;EIE24733.1 hypothetical protein COCSUDRAFT_36053 [Coccomyxa subellipsoidea C-169]	Q8VBW6/9e-92/ULA1_MOUSE NEDD8-activating enzyme E1 regulatory subunit OS=Mus musculus OX=10090 GN=Nae1 PE=1 SV=1	pavi:110764256/3e-80/NEDD8-activating enzyme E1 regulatory subunit AXR1-like; K04532 amyloid beta precursor protein binding protein 1	Hs4502169/5e-92/[O] KOG2016 NEDD8-activating complex, APP-BP1/UBA5 component	A0A0C9XNL9/0.0/A0A0C9XNL9_9AGAR NEDD8-activating enzyme E1 regulatory subunit OS=Laccaria amethystina LaAM-08-1 OX=1095629 GN=K443DRAFT_105421 PE=3 SV=1	PF00899/1.3E-11/ThiF family	biological_process:GO:0045116//protein neddylation;molecular_function:GO:0019781//NEDD8 activating enzyme activity;
RHS07151	NA	Q59X49/6e-14/DDR48_CANAL Stress protein DDR48 OS=Candida albicans (strain SC5314 / ATCC MYA-2876) OX=237561 GN=DDR48 PE=1 SV=1	NA	NA	A0A0C9XZB8/7e-26/A0A0C9XZB8_9AGAR Unplaced genomic scaffold K443scaffold_76, whole genome shotgun sequence OS=Laccaria amethystina LaAM-08-1 OX=1095629 GN=K443DRAFT_99164 PE=4 SV=1	NA	NA
RHS07152	XP_005643124.1/3.04928e-21/hypothetical protein COCSUDRAFT_45356 [Coccomyxa subellipsoidea C-169] &gt;EIE18580.1 hypothetical protein COCSUDRAFT_45356 [Coccomyxa subellipsoidea C-169]	Q5K8R6/2e-88/CXT1_CRYNJ Beta-1,2-xylosyltransferase 1 OS=Cryptococcus neoformans var. neoformans serotype D (strain JEC21 / ATCC MYA-565) OX=214684 GN=CXT1 PE=1 SV=1	NA	Hs13129086/5e-14/[R] KOG2458 Endoplasmic reticulum protein EP58, contains filamin rod domain and KDEL motif	A0A0D2KUF4/0.0/A0A0D2KUF4_9AGAR Glycosyltransferase family 90 protein OS=Hypholoma sublateritium FD-334 SS-4 OX=945553 GN=HYPSUDRAFT_45422 PE=4 SV=1	PF05686/2.0E-19/Glycosyl transferase family 90	NA
RHS07153	NA	O13300/5e-36/HYP3_AGABI Hydrophobin-3 OS=Agaricus bisporus OX=5341 GN=abh3 PE=3 SV=1	NA	NA	O60048/1e-39/O60048_PLEOS Hydrophobin OS=Pleurotus ostreatus OX=5322 GN=poh3 PE=3 SV=1	PF01185/3.1E-19/Fungal hydrophobin	NA
RHS07154	XP_005647421.1/1.9113e-17/RmlC-like cupin [Coccomyxa subellipsoidea C-169] &gt;EIE22877.1 RmlC-like cupin [Coccomyxa subellipsoidea C-169]	D4AKL6/2e-52/OXDD_ARTBC Probable oxalate decarboxylase ARB_04859 OS=Arthroderma benhamiae (strain ATCC MYA-4681 / CBS 112371) OX=663331 GN=ARB_04859 PE=1 SV=1	NA	NA	A0A0C9X9E6/1e-144/A0A0C9X9E6_9AGAR Unplaced genomic scaffold K443scaffold_69, whole genome shotgun sequence OS=Laccaria amethystina LaAM-08-1 OX=1095629 GN=K443DRAFT_555283 PE=4 SV=1	TIGR03404/2.0E-101/bicupin_oxalic: bicupin, oxalate decarboxylase family	cellular_component:GO:0005576//extracellular region;molecular_function:GO:0045735//nutrient reservoir activity;GO:0030145//manganese ion binding;
RHS07155	XP_005644777.1/3.4849e-33/Lanthionine synthetase C-like protein [Coccomyxa subellipsoidea C-169] &gt;EIE20233.1 Lanthionine synthetase C-like protein [Coccomyxa subellipsoidea C-169]	Q29HZ1/3e-34/LANC3_DROPS LanC-like protein 3 homolog OS=Drosophila pseudoobscura pseudoobscura OX=46245 GN=GA15215 PE=3 SV=1	NA	7292596/9e-31/[V] KOG2787 Lanthionine synthetase C-like protein 1	A0A0C9XJH4/7e-126/A0A0C9XJH4_9AGAR Unplaced genomic scaffold K443scaffold_69, whole genome shotgun sequence OS=Laccaria amethystina LaAM-08-1 OX=1095629 GN=K443DRAFT_555421 PE=4 SV=1	PR01950/1.6E-19/LanC-like protein superfamily signature	biological_process:GO:0007165//signal transduction;cellular_component:GO:0005886//plasma membrane;
RHS07156	XP_015950150.1/2.04795e-61/aldehyde oxidase GLOX [Arachis duranensis]	Q01772/7e-75/GLOX_PHACH Aldehyde oxidase GLOX OS=Phanerochaete chrysosporium OX=5306 GN=GLX PE=1 SV=1	NA	At1g75620/3e-49/[S] LSE0048 A Uncharacterized protein	A0A2A9NM56/0.0/A0A2A9NM56_9AGAR Copper radical oxidase OS=Amanita thiersii Skay4041 OX=703135 GN=AMATHDRAFT_142121 PE=4 SV=1	PF09118/1.1E-21/Domain of unknown function (DUF1929)	NA
RHS07157	NA	NA	NA	NA	NA	NA	NA
RHS07158	XP_001760663.1/1.38116e-55/predicted protein [Physcomitrella patens] &gt;EDQ74402.1 predicted protein [Physcomitrella patens]	P32907/1e-53/ATO2_YEAST Ammonia transport outward protein 2 OS=Saccharomyces cerevisiae (strain ATCC 204508 / S288c) OX=559292 GN=ATO2 PE=1 SV=1	ppp:112273084/3e-56/ammonia transport outward protein 2-like; K07034 uncharacterized protein	NA	A0A409XBN3/2e-113/A0A409XBN3_PSICY Uncharacterized protein OS=Psilocybe cyanescens OX=93625 GN=CVT25_005168 PE=4 SV=1	PF01184/3.2E-71/GPR1/FUN34/yaaH family	biological_process:GO:0006847//plasma membrane acetate transport;cellular_component:GO:0016021//integral component of membrane;GO:0005886//plasma membrane;molecular_function:GO:0015123//acetate transmembrane transporter activity;
RHS07159	XP_002990983.1/1.3179e-19/hypothetical protein SELMODRAFT_132594 [Selaginella moellendorffii] &gt;EFJ08027.1 hypothetical protein SELMODRAFT_132594 [Selaginella moellendorffii]	D4B0N9/4e-07/6PGL_ARTBC Probable 6-phosphogluconolactonase ARB_02015 OS=Arthroderma benhamiae (strain ATCC MYA-4681 / CBS 112371) OX=663331 GN=ARB_02015 PE=1 SV=1	NA	NA	A0A409XBR9/4e-180/A0A409XBR9_PSICY Uncharacterized protein OS=Psilocybe cyanescens OX=93625 GN=CVT25_005160 PE=4 SV=1	PF10282/4.4E-41/Lactonase, 7-bladed beta-propeller	NA
RHS07160	ETL86080.1/1.60657e-76/choline dehydrogenase [Phytophthora parasitica]	V5NDL4/2e-133/PDH1_AGACM Pyranose dehydrogenase OS=Agaricus campestris OX=56157 GN=pdh1 PE=1 SV=1	csl:COCSUDRAFT_60347/1e-63/alcohol oxidase; K22464 fatty acid photodecarboxylase [EC:4.1.1.106]	7293013/4e-68/[R] KOG1238 Glucose dehydrogenase/choline dehydrogenase/mandelonitrile lyase (GMC oxidoreductase family)	A0A409XJ09/0.0/A0A409XJ09_PSICY Uncharacterized protein OS=Psilocybe cyanescens OX=93625 GN=CVT25_005023 PE=4 SV=1	PF00732/4.4E-66/GMC oxidoreductase	molecular_function:GO:0016614//oxidoreductase activity, acting on CH-OH group of donors;GO:0050660//flavin adenine dinucleotide binding;
RHS07161	OWZ02438.1/1.19427e-57/Choline dehydrogenase [Phytophthora megakarya]	V5NDL4/6e-97/PDH1_AGACM Pyranose dehydrogenase OS=Agaricus campestris OX=56157 GN=pdh1 PE=1 SV=1	csl:COCSUDRAFT_60347/5e-45/alcohol oxidase; K22464 fatty acid photodecarboxylase [EC:4.1.1.106]	Hs18556423/3e-56/[R] KOG1238 Glucose dehydrogenase/choline dehydrogenase/mandelonitrile lyase (GMC oxidoreductase family)	A0A369JWC5/0.0/A0A369JWC5_HYPMA Pyranose dehydrogenase 3 OS=Hypsizygus marmoreus OX=39966 GN=pdh3_0 PE=4 SV=1	PF05199/1.7E-29/GMC oxidoreductase	molecular_function:GO:0016614//oxidoreductase activity, acting on CH-OH group of donors;GO:0050660//flavin adenine dinucleotide binding;
RHS07162	XP_005643124.1/8.96761e-21/hypothetical protein COCSUDRAFT_45356 [Coccomyxa subellipsoidea C-169] &gt;EIE18580.1 hypothetical protein COCSUDRAFT_45356 [Coccomyxa subellipsoidea C-169]	Q5K8R6/2e-90/CXT1_CRYNJ Beta-1,2-xylosyltransferase 1 OS=Cryptococcus neoformans var. neoformans serotype D (strain JEC21 / ATCC MYA-565) OX=214684 GN=CXT1 PE=1 SV=1	smo:SELMODRAFT_64803/3e-06/GT90B2; glycosyltransferase, CAZy family GT90; K13667 protein glucosyltransferase [EC:2.4.1.-]	Hs18554533/2e-13/[R] KOG2458 Endoplasmic reticulum protein EP58, contains filamin rod domain and KDEL motif	A0A409VZ33/0.0/A0A409VZ33_9AGAR Uncharacterized protein OS=Gymnopilus dilepis OX=231916 GN=CVT26_010389 PE=4 SV=1	PF05686/2.0E-18/Glycosyl transferase family 90	NA
RHS07163	XP_002961034.1/7.4165e-77/hypothetical protein SELMODRAFT_229910 [Selaginella moellendorffii] &gt;EFJ38573.1 hypothetical protein SELMODRAFT_229910 [Selaginella moellendorffii]	D4AS41/6e-73/A7056_ARTBC Uncharacterized FAD-linked oxidoreductase ARB_02478 OS=Arthroderma benhamiae (strain ATCC MYA-4681 / CBS 112371) OX=663331 GN=ARB_07056 PE=1 SV=2	sita:101776578/5e-15/berberine bridge enzyme-like 13; K22395 cinnamyl-alcohol dehydrogenase [EC:1.1.1.195]	At5g44410/1e-11/[QG] LSE0347 A Predicted berberine bridge enzyme/FAD-binding oxidoreductase	A0A2H3CFG1/0.0/A0A2H3CFG1_ARMGA FAD-binding domain-containing protein OS=Armillaria gallica OX=47427 GN=ARMGADRAFT_1020136 PE=3 SV=1	PF01565/3.9E-18/FAD binding domain	molecular_function:GO:0016614//oxidoreductase activity, acting on CH-OH group of donors;GO:0050660//flavin adenine dinucleotide binding;
RHS07164	XP_005786699.1/1.82334e-48/hypothetical protein EMIHUDRAFT_462546 [Emiliania huxleyi CCMP1516] &gt;EOD34270.1 hypothetical protein EMIHUDRAFT_462546 [Emiliania huxleyi CCMP1516]	NA	NA	NA	A0A369K2K7/0.0/A0A369K2K7_HYPMA Uncharacterized protein OS=Hypsizygus marmoreus OX=39966 GN=Hypma_006106 PE=4 SV=1	NA	biological_process:GO:0006629//lipid metabolic process;molecular_function:GO:0016787//hydrolase activity;GO:0003824//catalytic activity;
RHS07165	GAU28297.1/4.66312e-14/hypothetical protein TSUD_256250 [Trifolium subterraneum]	A5DK49/1e-13/AIM32_PICGU Altered inheritance of mitochondria protein 32 OS=Meyerozyma guilliermondii (strain ATCC 6260 / CBS 566 / DSM 6381 / JCM 1539 / NBRC 10279 / NRRL Y-324) OX=294746 GN=AIM32 PE=3 SV=2	NA	NA	A0A0L6W944/5e-90/A0A0L6W944_9AGAR Altered inheritance of mitochondria protein 32 OS=Termitomyces sp. J132 OX=1306850 GN=J132_05045 PE=4 SV=1	PF06999/3.4E-25/Sucrase/ferredoxin-like	NA
RHS07166	XP_005647968.1/5.21096e-23/C-signal [Coccomyxa subellipsoidea C-169] &gt;EIE23424.1 C-signal [Coccomyxa subellipsoidea C-169]	G4N292/1e-22/RED3_MAGO7 Short-chain dehydrogenase RED3 OS=Magnaporthe oryzae (strain 70-15 / ATCC MYA-4617 / FGSC 8958) OX=242507 GN=RED3 PE=2 SV=1	ppp:112287438/1e-12/3-dehydrosphinganine reductase TSC10A-like; K04708 3-dehydrosphinganine reductase [EC:1.1.1.102]	Hs4504503/3e-11/[QR] KOG1610 Corticosteroid 11-beta-dehydrogenase and related short chain-type dehydrogenases	A0A0C9XMA8/6e-80/A0A0C9XMA8_9AGAR Unplaced genomic scaffold K443scaffold_164, whole genome shotgun sequence OS=Laccaria amethystina LaAM-08-1 OX=1095629 GN=K443DRAFT_681713 PE=4 SV=1	PF00106/1.1E-27/short chain dehydrogenase	NA
RHS07167	CDM81250.1/1.52208e-100/unnamed protein product [Triticum aestivum]	Q12574/1e-130/TPIS_COPC7 Triosephosphate isomerase OS=Coprinopsis cinerea (strain Okayama-7 / 130 / ATCC MYA-4618 / FGSC 9003) OX=240176 GN=TPI PE=3 SV=2	ats:109756737/5e-100/LOC109756737; triosephosphate isomerase, cytosolic; K01803 triosephosphate isomerase (TIM) [EC:5.3.1.1]	At3g55440/5e-96/[G] KOG1643 Triosephosphate isomerase	A0A0C9XGV7/3e-139/A0A0C9XGV7_9AGAR Triosephosphate isomerase OS=Laccaria amethystina LaAM-08-1 OX=1095629 GN=K443DRAFT_681924 PE=3 SV=1	TIGR00419/4.1E-69/tim: triose-phosphate isomerase	biological_process:GO:0006098//pentose-phosphate shunt;GO:0006094//gluconeogenesis;GO:0006096//glycolytic process;cellular_component:GO:0005737//cytoplasm;molecular_function:GO:0004807//triose-phosphate isomerase activity;
RHS07168	XP_008872804.1/2.49101e-08/hypothetical protein H310_08725 [Aphanomyces invadans] &gt;ETV98607.1 hypothetical protein H310_08725 [Aphanomyces invadans]	P36148/2e-07/GPT2_YEAST Glycerol-3-phosphate O-acyltransferase 2 OS=Saccharomyces cerevisiae (strain ATCC 204508 / S288c) OX=559292 GN=GPT2 PE=1 SV=1	NA	NA	A0A067TJR4/3e-63/A0A067TJR4_GALM3 Uncharacterized protein OS=Galerina marginata (strain CBS 339.88) OX=685588 GN=GALMADRAFT_243122 PE=4 SV=1	NA	biological_process:GO:0008152//metabolic process;cellular_component:GO:0016021//integral component of membrane;molecular_function:GO:0016746//transferase activity, transferring acyl groups;
RHS07169	AQL04633.1/4.34116e-81/40S ribosomal protein S14 [Zea mays]	Q08699/5e-84/RS14_PODCA 40S ribosomal protein S14 OS=Podocoryna carnea OX=6096 GN=RPS14 PE=2 SV=1	zma:103629631/7e-85/LOW QUALITY PROTEIN: 40S ribosomal protein S14-like; K02955 small subunit ribosomal protein S14e	Hs5032051/6e-83/[J] KOG0407 40S ribosomal protein S14	A0A0L6X0S3/1e-102/A0A0L6X0S3_9AGAR 40S ribosomal protein S14 OS=Termitomyces sp. J132 OX=1306850 GN=J132_03303 PE=3 SV=1	PF00411/1.4E-46/Ribosomal protein S11	NA
RHS07170	NA	Q01738/2e-65/CDH_PHACH Cellobiose dehydrogenase OS=Phanerochaete chrysosporium OX=5306 GN=CDH-1 PE=1 SV=1	NA	NA	A0A409VN63/2e-100/A0A409VN63_9AGAR Uncharacterized protein OS=Gymnopilus dilepis OX=231916 GN=CVT26_007421 PE=3 SV=1	PF16010/7.0E-52/Cytochrome domain of cellobiose dehydrogenase	NA
RHS07171	NA	NA	NA	NA	A0A0C2TE00/6e-30/A0A0C2TE00_AMAMU Uncharacterized protein OS=Amanita muscaria Koide BX008 OX=946122 GN=M378DRAFT_556613 PE=4 SV=1	PF14634/2.8E-7/zinc-RING finger domain	NA
RHS07172	XP_008875486.1/2.43342e-23/hypothetical protein H310_10808 [Aphanomyces invadans] &gt;ETV95735.1 hypothetical protein H310_10808 [Aphanomyces invadans]	Q9FMR5/3e-22/VA714_ARATH Vesicle-associated membrane protein 714 OS=Arabidopsis thaliana OX=3702 GN=VAMP714 PE=1 SV=1	hbr:110640128/5e-22/vesicle-associated membrane protein 714; K08515 vesicle-associated membrane protein 7	At5g22360/1e-22/[U] KOG0859 Synaptobrevin/VAMP-like protein	A0A369JWM2/1e-50/A0A369JWM2_HYPMA Uncharacterized protein OS=Hypsizygus marmoreus OX=39966 GN=Hypma_006089 PE=3 SV=1	PF00957/3.6E-27/Synaptobrevin	biological_process:GO:0016192//vesicle-mediated transport;cellular_component:GO:0016021//integral component of membrane;
RHS07173	NA	NA	NA	NA	A0A0C9XM90/8e-103/A0A0C9XM90_9AGAR Unplaced genomic scaffold K443scaffold_164, whole genome shotgun sequence OS=Laccaria amethystina LaAM-08-1 OX=1095629 GN=K443DRAFT_681693 PE=4 SV=1	PS50089/12.799/Zinc finger RING-type profile.	NA
RHS07174	XP_003543483.1/1.13551e-13/PREDICTED: protein transport protein Sec61 subunit beta-like [Glycine max]	Q9HFC7/3e-21/SC61B_YARLI Protein transport protein Sec61 subunit beta OS=Yarrowia lipolytica (strain CLIB 122 / E 150) OX=284591 GN=SBH1 PE=3 SV=1	gmx:100815435/2e-14/protein transport protein Sec61 subunit beta-like; K09481 protein transport protein SEC61 subunit beta	SPBC2G2.03c/3e-14/[O] KOG3457 Sec61 protein translocation complex, beta subunit	A0A2A9NKH1/3e-38/A0A2A9NKH1_9AGAR Protein transport protein Sec61 subunit beta OS=Amanita thiersii Skay4041 OX=703135 GN=AMATHDRAFT_64568 PE=3 SV=1	PF03911/2.3E-17/Sec61beta family	biological_process:GO:0006886//intracellular protein transport;GO:0006616//SRP-dependent cotranslational protein targeting to membrane, translocation;GO:0031204//posttranslational protein targeting to membrane, translocation;cellular_component:GO:0031205//endoplasmic reticulum Sec complex;GO:0005784//Sec61 translocon complex;GO:0016021//integral component of membrane;molecular_function:GO:0005086…
RHS07175	NA	NA	NA	YPL165c/4e-12/[B] KOG2084 Predicted histone tail methylase containing SET domain	A0A0C9XM93/2e-84/A0A0C9XM93_9AGAR Unplaced genomic scaffold K443scaffold_164, whole genome shotgun sequence OS=Laccaria amethystina LaAM-08-1 OX=1095629 GN=K443DRAFT_681700 PE=4 SV=1	NA	NA
RHS07176	NA	NA	NA	NA	A0A0D7BRQ1/2e-27/A0A0D7BRQ1_9AGAR Uncharacterized protein OS=Cylindrobasidium torrendii FP15055 ss-10 OX=1314674 GN=CYLTODRAFT_55878 PE=4 SV=1	PF13560/1.5E-9/Helix-turn-helix domain	NA
RHS07177	NA	NA	NA	NA	A0A409VL06/2e-111/A0A409VL06_9AGAR Uncharacterized protein OS=Gymnopilus dilepis OX=231916 GN=CVT26_010012 PE=4 SV=1	NA	NA
RHS07178	KOO21375.1/8.78823e-155/eukaryotic translation initiation factor 3 subunit l-like protein [Chrysochromulina sp. CCMP291]	Q4PF85/0.0/EIF3L_USTMA Eukaryotic translation initiation factor 3 subunit L OS=Ustilago maydis (strain 521 / FGSC 9021) OX=237631 GN=UMAG_01228 PE=3 SV=1	ppp:112278630/7e-136/eukaryotic translation initiation factor 3 subunit L-like; K15029 translation initiation factor 3 subunit L	Hs7705433/7e-153/[JK] KOG3677 RNA polymerase I-associated factor - PAF67	A0A0C9X1I6/0.0/A0A0C9X1I6_9AGAR Eukaryotic translation initiation factor 3 subunit L OS=Laccaria amethystina LaAM-08-1 OX=1095629 GN=K443DRAFT_680315 PE=3 SV=1	PF10255/6.9E-166/RNA polymerase I-associated factor PAF67	biological_process:GO:0006446//regulation of translational initiation;GO:0001731//formation of translation preinitiation complex;cellular_component:GO:0016282//eukaryotic 43S preinitiation complex;GO:0033290//eukaryotic 48S preinitiation complex;GO:0005852//eukaryotic translation initiation factor 3 complex;molecular_function:GO:0003743//translation initiation factor activity;
RHS07179	XP_010662686.1/4.36256e-19/PREDICTED: probable RNA-binding protein 18 [Vitis vinifera] &gt;XP_010662687.1 PREDICTED: probable RNA-binding protein 18 [Vitis vinifera] &gt;XP_010662688.1 PREDICTED: probable RNA-binding protein 18 [Vitis vinifera] &gt;CBI22666.3 unnamed protein product, partial [Vitis vinifera]	Q5R6W3/4e-23/RBM18_PONAB Probable RNA-binding protein 18 OS=Pongo abelii OX=9601 GN=RBM18 PE=2 SV=1	csat:104793268/2e-10/U11/U12 small nuclear ribonucleoprotein 35 kDa protein isoform X1; K13155 U11/U12 small nuclear ribonucleoprotein 35 kDa protein	At2g43370/5e-11/[A] KOG0113 U1 small nuclear ribonucleoprotein (RRM superfamily)	A0A067SU26/2e-93/A0A067SU26_GALM3 Uncharacterized protein OS=Galerina marginata (strain CBS 339.88) OX=685588 GN=GALMADRAFT_76553 PE=4 SV=1	PS50102/17.353/Eukaryotic RNA Recognition Motif (RRM) profile.	NA
RHS07180	OAE22893.1/1.42897e-62/hypothetical protein AXG93_3544s1050 [Marchantia polymorpha subsp. ruderalis]	NA	NA	NA	A0A369K4Z5/0.0/A0A369K4Z5_HYPMA Uncharacterized protein OS=Hypsizygus marmoreus OX=39966 GN=Hypma_015121 PE=3 SV=1	PF04616/1.6E-18/Glycosyl hydrolases family 43	biological_process:GO:0005975//carbohydrate metabolic process;molecular_function:GO:0004553//hydrolase activity, hydrolyzing O-glycosyl compounds;
RHS07181	XP_008890949.1/2.302e-77/60S ribosomal protein L23 [Phytophthora parasitica INRA-310] &gt;XP_009523977.1 hypothetical protein PHYSODRAFT_285581 [Phytophthora sojae] &gt;EGZ21260.1 hypothetical protein PHYSODRAFT_285581 [Phytophthora sojae] &gt;ETI56118.1 60S ribosomal protein L23 [Phytophthora parasitica P1569] &gt;ETK95909.1 60S ribosomal protein L23 [Phytophthora parasitica] &gt;ETL49289.1 60S …	P0CT61/5e-80/RL23B_SCHPO 60S ribosomal protein L23-B OS=Schizosaccharomyces pombe (strain 972 / ATCC 24843) OX=284812 GN=rpl2302 PE=3 SV=1	csl:COCSUDRAFT_52401/5e-76/ribosomal protein L14b/L23e; K02894 large subunit ribosomal protein L23e	SPCC1322.11/2e-80/[J] KOG0901 60S ribosomal protein L14/L17/L23	A0A409YAE1/1e-90/A0A409YAE1_9AGAR Uncharacterized protein OS=Panaeolus cyanescens OX=181874 GN=CVT24_009539 PE=3 SV=1	PF00238/1.0E-34/Ribosomal protein L14p/L23e	biological_process:GO:0006412//translation;cellular_component:GO:0005840//ribosome;GO:0022625//cytosolic large ribosomal subunit;molecular_function:GO:0003735//structural constituent of ribosome;GO:0070180//large ribosomal subunit rRNA binding;
RHS07182	GAQ92572.1/1.94128e-176/catalase [Klebsormidium nitens]	O13289/0.0/CATA_CANAL Peroxisomal catalase OS=Candida albicans (strain SC5314 / ATCC MYA-2876) OX=237561 GN=CAT1 PE=2 SV=5	ppp:112295828/2e-162/uncharacterized protein LOC112295828; K03781 catalase [EC:1.11.1.6]	SPCC757.07c/0.0/[P] KOG0047 Catalase	A0A2H3B1T2/0.0/A0A2H3B1T2_9AGAR Catalase OS=Armillaria solidipes OX=1076256 GN=ARMSODRAFT_990169 PE=3 SV=1	PF06628/7.7E-17/Catalase-related immune-responsive	biological_process:GO:0006979//response to oxidative stress;GO:0042744//hydrogen peroxide catabolic process;molecular_function:GO:0046872//metal ion binding;GO:0020037//heme binding;GO:0004096//catalase activity;
RHS07183	AIG56507.1/4.11265e-70/secreted protein [Achlya hypogyna] &gt;OQR80647.1 glycoside hydrolase family 18 protein [Achlya hypogyna]	P32470/2e-122/CHI1_APHAL Chitinase 1 OS=Aphanocladium album OX=12942 GN=CHI1 PE=1 SV=2	cit:102621131/1e-34/class V chitinase-like; K01183 chitinase [EC:3.2.1.14]	YDR371w/1e-42/[G] KOG2806 Chitinase	A0A137QN79/0.0/A0A137QN79_9AGAR Chitinase 1 OS=Leucoagaricus sp. SymC.cos OX=1714833 GN=AN958_06220 PE=3 SV=1	PF00704/6.5E-70/Glycosyl hydrolases family 18	biological_process:GO:0005975//carbohydrate metabolic process;molecular_function:GO:0008061//chitin binding;
RHS07184	XP_008910128.1/2.99349e-105/septum-promoting GTP-binding protein 1 [Phytophthora parasitica INRA-310] &gt;ETL86827.1 septum-promoting GTP-binding protein 1 [Phytophthora parasitica] &gt;ETM40000.1 septum-promoting GTP-binding protein 1 [Phytophthora parasitica] &gt;ETN04734.1 septum-promoting GTP-binding protein 1 [Phytophthora parasitica INRA-310] &gt;ETO68739.1 septum-promoting GTP-binding prot…	P87027/3e-120/SPG1_SCHPO Septum-promoting GTP-binding protein 1 OS=Schizosaccharomyces pombe (strain 972 / ATCC 24843) OX=284812 GN=spg1 PE=1 SV=1	gsl:Gasu_17880/1e-78/small GTP-binding protein of Rab family; K06682 Gtp-binding protein of the ras superfamily involved in termination of M-phase	SPAC1565.06c/1e-120/[R] KOG1673 Ras GTPases	A0A067SH56/6e-155/A0A067SH56_GALM3 Uncharacterized protein OS=Galerina marginata (strain CBS 339.88) OX=685588 GN=GALMADRAFT_230262 PE=4 SV=1	TIGR00231/1.3E-18/small_GTP: small GTP-binding protein domain	biological_process:GO:0007049//cell cycle;molecular_function:GO:0005525//GTP binding;GO:0003924//GTPase activity;
RHS07185	BAK08300.1/1.25394e-61/predicted protein [Hordeum vulgare subsp. vulgare]	Q01738/0.0/CDH_PHACH Cellobiose dehydrogenase OS=Phanerochaete chrysosporium OX=5306 GN=CDH-1 PE=1 SV=1	dcr:108192572/1e-08/protein HOTHEAD-like; K15403 fatty acid omega-hydroxy dehydrogenase [EC:1.1.-.-]	Hs18556423/3e-12/[R] KOG1238 Glucose dehydrogenase/choline dehydrogenase/mandelonitrile lyase (GMC oxidoreductase family)	A0A369JZK7/0.0/A0A369JZK7_HYPMA Cellobiose dehydrogenase OS=Hypsizygus marmoreus OX=39966 GN=CDH-1_2 PE=4 SV=1	PF16010/2.3E-52/Cytochrome domain of cellobiose dehydrogenase	biological_process:GO:0006508//proteolysis;cellular_component:GO:0005576//extracellular region;molecular_function:GO:0016614//oxidoreductase activity, acting on CH-OH group of donors;GO:0050660//flavin adenine dinucleotide binding;
RHS07186	NA	P56502/2e-73/BAR3_SCHCM Pheromone B alpha 3 receptor OS=Schizophyllum commune (strain H4-8 / FGSC 9210) OX=578458 GN=BAR3 PE=3 SV=2	NA	NA	A0A409XFM7/9e-100/A0A409XFM7_PSICY Uncharacterized protein OS=Psilocybe cyanescens OX=93625 GN=CVT25_012222 PE=4 SV=1	PF02076/1.2E-95/Pheromone A receptor	NA
RHS07187	NA	NA	NA	NA	A0A2H3D5B2/2e-14/A0A2H3D5B2_ARMGA Uncharacterized protein OS=Armillaria gallica OX=47427 GN=ARMGADRAFT_1082712 PE=4 SV=1	NA	NA
RHS08279	BAJ99415.1/0/predicted protein [Hordeum vulgare subsp. vulgare]	A8PDE3/0.0/ACSA_COPC7 Acetyl-coenzyme A synthetase OS=Coprinopsis cinerea (strain Okayama-7 / 130 / ATCC MYA-4618 / FGSC 9003) OX=240176 GN=ACS-1 PE=3 SV=1	cre:CHLREDRAFT_139750/0.0/ACS2; acetyl CoA synthetase; K01895 acetyl-CoA synthetase [EC:6.2.1.1]	YLR153c/0.0/[I] KOG1175 Acyl-CoA synthetase	A0A067S6R1/0.0/A0A067S6R1_GALM3 Acetyl-coenzyme A synthetase OS=Galerina marginata (strain CBS 339.88) OX=685588 GN=GALMADRAFT_106403 PE=3 SV=1	PF16177/2.7E-13/Acetyl-coenzyme A synthetase N-terminus	biological_process:GO:0019427//acetyl-CoA biosynthetic process from acetate;molecular_function:GO:0003987//acetate-CoA ligase activity;GO:0005524//ATP binding;GO:0016208//AMP binding;
RHS08280	NA	NA	NA	NA	A0A0C2XEC3/4e-149/A0A0C2XEC3_HEBCY Uncharacterized protein OS=Hebeloma cylindrosporum h7 OX=686832 GN=M413DRAFT_449309 PE=4 SV=1	TIGR02453/1.2E-41/TIGR02453: TIGR02453 family protein	NA
RHS08281	NA	NA	NA	NA	A0A067TRH2/3e-11/A0A067TRH2_GALM3 Uncharacterized protein OS=Galerina marginata (strain CBS 339.88) OX=685588 GN=GALMADRAFT_218880 PE=4 SV=1	NA	NA
RHS08282	NA	NA	NA	NA	NA	NA	NA
RHS08283	NA	NA	NA	NA	A0A067S6N4/6e-30/A0A067S6N4_GALM3 Uncharacterized protein OS=Galerina marginata (strain CBS 339.88) OX=685588 GN=GALMADRAFT_147866 PE=4 SV=1	NA	NA
RHS08284	NA	O57460/1e-08/TLL1_DANRE Dorsal-ventral patterning tolloid-like protein 1 OS=Danio rerio OX=7955 GN=tll1 PE=2 SV=1	NA	HsM6912722/3e-08/[O] KOG3714 Meprin A metalloprotease	A0A0C3BHP9/3e-74/A0A0C3BHP9_HEBCY Uncharacterized protein OS=Hebeloma cylindrosporum h7 OX=686832 GN=M413DRAFT_31839 PE=4 SV=1	PF01400/3.0E-10/Astacin (Peptidase family M12A)	NA
RHS08285	KMZ71348.1/4.56785e-87/ABC transporter B family member 11 [Zostera marina]	P21448/4e-95/MDR1_CRIGR ATP-dependent translocase ABCB1 OS=Cricetulus griseus OX=10029 GN=ABCB1 PE=1 SV=2	psom:113286350/2e-85/ABC transporter B family member 9-like; K05658 ATP-binding cassette, subfamily B (MDR/TAP), member 1 [EC:7.6.2.2]	Hs4505769/9e-93/[Q] KOG0055 Multidrug/pheromone exporter, ABC superfamily	A0A0C9Y5Y5/0.0/A0A0C9Y5Y5_9AGAR Unplaced genomic scaffold K443scaffold_45, whole genome shotgun sequence OS=Laccaria amethystina LaAM-08-1 OX=1095629 GN=K443DRAFT_5385 PE=4 SV=1	PS50893/25.53/ATP-binding cassette, ABC transporter-type domain profile.	NA
RHS08286	XP_001759460.1/5.33078e-38/predicted protein [Physcomitrella patens] &gt;EDQ75762.1 predicted protein [Physcomitrella patens]	Q9US38/7e-76/YFZ3_SCHPO AB hydrolase superfamily protein C1039.03 OS=Schizosaccharomyces pombe (strain 972 / ATCC 24843) OX=284812 GN=SPAC1039.03 PE=3 SV=1	aly:ARALYDRAFT_477795/4e-20/ATGID1A/GID1A; K14493 gibberellin receptor GID1 [EC:3.-.-.-]	SPAC1039.03/3e-76/[V] KOG1515 Arylacetamide deacetylase	A0A409WKG5/1e-147/A0A409WKG5_PSICY Uncharacterized protein OS=Psilocybe cyanescens OX=93625 GN=CVT25_002317 PE=4 SV=1	PF07859/1.3E-56/alpha/beta hydrolase fold	biological_process:GO:0008152//metabolic process;molecular_function:GO:0016787//hydrolase activity;
RHS08287	XP_001759460.1/4.81901e-35/predicted protein [Physcomitrella patens] &gt;EDQ75762.1 predicted protein [Physcomitrella patens]	Q9US38/2e-73/YFZ3_SCHPO AB hydrolase superfamily protein C1039.03 OS=Schizosaccharomyces pombe (strain 972 / ATCC 24843) OX=284812 GN=SPAC1039.03 PE=3 SV=1	dcr:108200079/9e-20/gibberellin receptor GID1B-like; K14493 gibberellin receptor GID1 [EC:3.-.-.-]	SPAC1039.03/9e-74/[V] KOG1515 Arylacetamide deacetylase	A0A409WKG5/4e-141/A0A409WKG5_PSICY Uncharacterized protein OS=Psilocybe cyanescens OX=93625 GN=CVT25_002317 PE=4 SV=1	PF07859/2.9E-60/alpha/beta hydrolase fold	biological_process:GO:0008152//metabolic process;molecular_function:GO:0016787//hydrolase activity;
RHS08288	NA	NA	NA	NA	A0A0C3BXW0/2e-10/A0A0C3BXW0_HEBCY Uncharacterized protein OS=Hebeloma cylindrosporum h7 OX=686832 GN=M413DRAFT_449326 PE=4 SV=1	NA	NA
RHS08289	XP_011077290.1/1.45409e-52/protein fluG [Sesamum indicum]	P38094/4e-62/FLUG_EMENI Protein fluG OS=Emericella nidulans (strain FGSC A4 / ATCC 38163 / CBS 112.46 / NRRL 194 / M139) OX=227321 GN=fluG PE=1 SV=1	mtr:MTR_0417s0020/1e-49/glutamate-ammonia ligase-like protein; K01915 glutamine synthetase [EC:6.3.1.2]	At3g53180/1e-49/[E] KOG0683 Glutamine synthetase	A0A0C2WEJ6/0.0/A0A0C2WEJ6_AMAMU Uncharacterized protein OS=Amanita muscaria Koide BX008 OX=946122 GN=M378DRAFT_168822 PE=3 SV=1	PF00120/4.3E-67/Glutamine synthetase, catalytic domain	biological_process:GO:0006542//glutamine biosynthetic process;molecular_function:GO:0016787//hydrolase activity;GO:0004356//glutamate-ammonia ligase activity;
RHS08290	OLP96967.1/1.36248e-28/Interferon-induced guanylate-binding protein 2 [Symbiodinium microadriaticum]	O13991/6e-16/YEG9_SCHPO Uncharacterized oxidoreductase C26H5.09c OS=Schizosaccharomyces pombe (strain 972 / ATCC 24843) OX=284812 GN=SPAC26H5.09c PE=2 SV=3	NA	SPAC26H5.09c/3e-16/[R] KOG2742 Predicted oxidoreductase	A0A409YDK1/2e-163/A0A409YDK1_9AGAR Uncharacterized protein OS=Gymnopilus dilepis OX=231916 GN=CVT26_016011 PE=4 SV=1	PF01408/8.0E-15/Oxidoreductase family, NAD-binding Rossmann fold	molecular_function:GO:0016491//oxidoreductase activity;
RHS08291	XP_001771505.1/5.68166e-126/predicted protein [Physcomitrella patens] &gt;EDQ63705.1 predicted protein [Physcomitrella patens]	Q25BW4/0.0/BGL1B_PHACH Beta-glucosidase 1B OS=Phanerochaete chrysosporium OX=5306 GN=BGL1B PE=1 SV=1	ppp:112288300/1e-126/beta-glucosidase 42-like isoform X1; K01188 beta-glucosidase [EC:3.2.1.21]	At1g26560/3e-110/[G] KOG0626 Beta-glucosidase, lactase phlorizinhydrolase, and related proteins	A0A401H5Y9/0.0/A0A401H5Y9_9APHY Beta-glucosidase 1B OS=Sparassis crispa OX=139825 GN=SCP_1701810 PE=4 SV=1	PS50048/9.512/Zn(2)-C6 fungal-type DNA-binding domain profile.	biological_process:GO:1901657//glycosyl compound metabolic process;GO:0030245//cellulose catabolic process;GO:0005975//carbohydrate metabolic process;cellular_component:GO:0016021//integral component of membrane;molecular_function:GO:0008422//beta-glucosidase activity;GO:0004553//hydrolase activity, hydrolyzing O-glycosyl compounds;GO:0102483//scopolin beta-glucosidase activity;
RHS08292	XP_008803262.1/8.58811e-07/PREDICTED: peroxisome biogenesis protein 3-2-like [Phoenix dactylifera]	Q874C0/7e-19/PEX3_YARLI Peroxisomal biogenesis factor 3 OS=Yarrowia lipolytica (strain CLIB 122 / E 150) OX=284591 GN=PEX3 PE=3 SV=1	pda:103716860/2e-07/peroxisome biogenesis protein 3-2-like; K13336 peroxin-3	YDR329c/3e-14/[MU] KOG4444 Peroxisomal assembly protein PEX3	A0A0C9XY05/0.0/A0A0C9XY05_9AGAR Unplaced genomic scaffold K443scaffold_56, whole genome shotgun sequence OS=Laccaria amethystina LaAM-08-1 OX=1095629 GN=K443DRAFT_96706 PE=4 SV=1	PF04882/2.4E-121/Peroxin-3	biological_process:GO:0007031//peroxisome organization;cellular_component:GO:0005779//integral component of peroxisomal membrane;
RHS08293	NA	NA	NA	NA	A0A0C9XAT1/3e-65/A0A0C9XAT1_9AGAR Unplaced genomic scaffold K443scaffold_131, whole genome shotgun sequence OS=Laccaria amethystina LaAM-08-1 OX=1095629 GN=K443DRAFT_9068 PE=4 SV=1	NA	NA
RHS08294	NA	A8Q2D1/4e-07/NAS35_BRUMA Zinc metalloproteinase dpy-31 OS=Brugia malayi OX=6279 GN=dpy-31 PE=1 SV=2	NA	NA	A0A0C3BHP9/1e-85/A0A0C3BHP9_HEBCY Uncharacterized protein OS=Hebeloma cylindrosporum h7 OX=686832 GN=M413DRAFT_31839 PE=4 SV=1	PF01400/2.2E-9/Astacin (Peptidase family M12A)	NA
RHS08295	NA	NA	NA	NA	A0A0C9YA95/8e-29/A0A0C9YA95_9AGAR Unplaced genomic scaffold K443scaffold_30, whole genome shotgun sequence OS=Laccaria amethystina LaAM-08-1 OX=1095629 GN=K443DRAFT_92166 PE=4 SV=1	PF00172/5.9E-5/Fungal Zn(2)-Cys(6) binuclear cluster domain	NA
RHS08296	OQR83471.1/2.51604e-84/phospholipase C-eta2 [Achlya hypogyna]	P40977/3e-127/PLC1_SCHPO 1-phosphatidylinositol 4,5-bisphosphate phosphodiesterase 1 OS=Schizosaccharomyces pombe (strain 972 / ATCC 24843) OX=284812 GN=plc1 PE=1 SV=1	han:110878908/4e-56/phosphoinositide phospholipase C 4-like isoform X1; K05857 phosphatidylinositol phospholipase C, delta [EC:3.1.4.11]	SPAC22F8.11/1e-127/[T] KOG0169 Phosphoinositide-specific phospholipase C	A0A409WSB0/0.0/A0A409WSB0_PSICY Phosphoinositide phospholipase C OS=Psilocybe cyanescens OX=93625 GN=CVT25_015898 PE=4 SV=1	PF00387/5.1E-42/Phosphatidylinositol-specific phospholipase C, Y domain	biological_process:GO:0016042//lipid catabolic process;GO:0035556//intracellular signal transduction;cellular_component:GO:0005622//intracellular;molecular_function:GO:0004435//phosphatidylinositol phospholipase C activity;GO:0005509//calcium ion binding;GO:0004871//signal transducer activity;
RHS08297	EJK65518.1/5.51023e-112/hypothetical protein THAOC_13606 [Thalassiosira oceanica]	Q4P9K9/0.0/CHS8_USTMA Chitin synthase 8 OS=Ustilago maydis (strain 521 / FGSC 9021) OX=237631 GN=CHS8 PE=3 SV=1	ccaj:109812054/4e-87/myosin-9 isoform X1; K10357 myosin V	YBR023c/3e-115/[M] KOG2571 Chitin synthase/hyaluronan synthase (glycosyltransferases)	A0A0L6X384/0.0/A0A0L6X384_9AGAR Chitin synthase 8 OS=Termitomyces sp. J132 OX=1306850 GN=J132_01629 PE=3 SV=1	PR00193/3.8E-21/Myosin heavy chain signature	NA
RHS08298	ABK24372.1/2.46098e-103/unknown [Picea sitchensis]	P0CQ02/8e-159/PTPA2_CRYNJ Serine/threonine-protein phosphatase 2A activator 2 OS=Cryptococcus neoformans var. neoformans serotype D (strain JEC21 / ATCC MYA-565) OX=214684 GN=RRD2 PE=3 SV=1	ppp:112279163/6e-103/serine/threonine-protein phosphatase 2A activator-like; K17605 serine/threonine-protein phosphatase 2A activator	SPAC1782.05/2e-114/[DT] KOG2867 Phosphotyrosyl phosphatase activator	A0A0C3BI36/0.0/A0A0C3BI36_HEBCY Serine/threonine-protein phosphatase 2A activator OS=Hebeloma cylindrosporum h7 OX=686832 GN=M413DRAFT_31797 PE=3 SV=1	PF03095/8.1E-125/Phosphotyrosyl phosphate activator (PTPA) protein	biological_process:GO:0030472//mitotic spindle organization in nucleus;cellular_component:GO:0005634//nucleus;GO:0000159//protein phosphatase type 2A complex;GO:0005737//cytoplasm;molecular_function:GO:0008160//protein tyrosine phosphatase activator activity;GO:0003755//peptidyl-prolyl cis-trans isomerase activity;GO:0019211//phosphatase activator activity;
RHS08299	OAE24358.1/8.67415e-15/hypothetical protein AXG93_4343s1250 [Marchantia polymorpha subsp. ruderalis]	Q9VDS6/3e-10/SURF6_DROME Surfeit locus protein 6 homolog OS=Drosophila melanogaster OX=7227 GN=Surf6 PE=1 SV=1	NA	7300562/1e-10/[S] KOG2885 Uncharacterized conserved protein	A0A369J4V3/3e-155/A0A369J4V3_HYPMA Ribosomal RNA-processing protein 14 OS=Hypsizygus marmoreus OX=39966 GN=RRP14 PE=4 SV=1	PF15459/4.8E-22/60S ribosome biogenesis protein Rrp14	biological_process:GO:0042274//ribosomal small subunit biogenesis;GO:0042273//ribosomal large subunit biogenesis;cellular_component:GO:0005730//nucleolus;GO:0022625//cytosolic large ribosomal subunit;molecular_function:GO:0003723//RNA binding;GO:0003677//DNA binding;
RHS08300	XP_009521377.1/4.33591e-11/hypothetical protein PHYSODRAFT_327019 [Phytophthora sojae] &gt;EGZ26089.1 hypothetical protein PHYSODRAFT_327019 [Phytophthora sojae]	Q2M3Z8/3e-09/CRN15_PHYIN Crinkler effector protein 15 OS=Phytophthora infestans OX=4787 GN=CRN15 PE=2 SV=1	NA	NA	A0A0C2WZ91/2e-88/A0A0C2WZ91_AMAMU Uncharacterized protein (Fragment) OS=Amanita muscaria Koide BX008 OX=946122 GN=M378DRAFT_329882 PE=4 SV=1	NA	NA
RHS04084	NA	NA	NA	NA	A0A369JWG8/2e-49/A0A369JWG8_HYPMA Uncharacterized protein OS=Hypsizygus marmoreus OX=39966 GN=Hypma_007432 PE=4 SV=1	NA	NA
RHS04085	NA	NA	NA	NA	A0A409XDT8/6e-12/A0A409XDT8_PSICY Uncharacterized protein OS=Psilocybe cyanescens OX=93625 GN=CVT25_005057 PE=4 SV=1	NA	NA
RHS04086	NA	NA	NA	NA	A0A0C9XC86/3e-35/A0A0C9XC86_9AGAR Unplaced genomic scaffold K443scaffold_57, whole genome shotgun sequence OS=Laccaria amethystina LaAM-08-1 OX=1095629 GN=K443DRAFT_677540 PE=4 SV=1	NA	NA
RHS04087	XP_020553202.1/2.20991e-19/basic form of pathogenesis-related protein 1-like [Sesamum indicum]	P47033/7e-17/PRY3_YEAST Cell wall protein PRY3 OS=Saccharomyces cerevisiae (strain ATCC 204508 / S288c) OX=559292 GN=PRY3 PE=1 SV=1	sind:105172652/4e-20/basic form of pathogenesis-related protein 1-like; K13449 pathogenesis-related protein 1	YJL078c_1/2e-17/[S] KOG3017 Defense-related protein containing SCP domain	A0A0C3C845/1e-44/A0A0C3C845_HEBCY Uncharacterized protein OS=Hebeloma cylindrosporum h7 OX=686832 GN=M413DRAFT_178634 PE=3 SV=1	PF00188/2.0E-12/Cysteine-rich secretory protein family	cellular_component:GO:0005576//extracellular region;
RHS04088	NA	NA	NA	NA	A0A2H3CXM4/7e-13/A0A2H3CXM4_ARMGA Uncharacterized protein OS=Armillaria gallica OX=47427 GN=ARMGADRAFT_1086420 PE=4 SV=1	NA	NA
RHS04089	NA	NA	NA	NA	Q5AT36/4e-11/Q5AT36_EMENI Uncharacterized protein OS=Emericella nidulans (strain FGSC A4 / ATCC 38163 / CBS 112.46 / NRRL 194 / M139) OX=227321 GN=AN8544.2 PE=4 SV=1	NA	NA
RHS04090	XP_009348176.1/1.43254e-25/PREDICTED: protein HOL1-like [Pyrus x bretschneideri] &gt;OWY42178.1 protein HOL1-like [Alternaria alternata]	F5HN69/4e-30/CPAT_ASPOZ MFS transporter cpaT OS=Aspergillus oryzae OX=5062 GN=cpaT PE=3 SV=1	NA	SPBC530.02/2e-27/[R] KOG0255 Synaptic vesicle transporter SVOP and related transporters (major facilitator superfamily)	A0A369JXJ3/0.0/A0A369JXJ3_HYPMA Uncharacterized protein OS=Hypsizygus marmoreus OX=39966 GN=Hypma_007426 PE=4 SV=1	PS50850/21.459/Major facilitator superfamily (MFS) profile.	biological_process:GO:0055085//transmembrane transport;cellular_component:GO:0016021//integral component of membrane;
RHS04091	GAQ82710.1/0/Glucosidase II catalytic (alpha) subunit and related enzymes [Klebsormidium nitens]	Q9US55/0.0/GLU2A_SCHPO Glucosidase 2 subunit alpha OS=Schizosaccharomyces pombe (strain 972 / ATCC 24843) OX=284812 GN=gls2 PE=1 SV=1	sind:105178034/0.0/probable glucan 1,3-alpha-glucosidase; K05546 mannosyl-oligosaccharide alpha-1,3-glucosidase [EC:3.2.1.207]	SPAC1002.03c/0.0/[GMO] KOG1066 Glucosidase II catalytic (alpha) subunit and related enzymes, glycosyl hydrolase family 31	A0A0C9Y2Z1/0.0/A0A0C9Y2Z1_9AGAR Unplaced genomic scaffold K443scaffold_57, whole genome shotgun sequence OS=Laccaria amethystina LaAM-08-1 OX=1095629 GN=K443DRAFT_677533 PE=3 SV=1	PF13802/2.1E-12/Galactose mutarotase-like	NA
RHS04092	NA	NA	NA	NA	A0A0C9XXU1/2e-54/A0A0C9XXU1_9AGAR Unplaced genomic scaffold K443scaffold_57, whole genome shotgun sequence OS=Laccaria amethystina LaAM-08-1 OX=1095629 GN=K443DRAFT_96859 PE=4 SV=1	NA	NA
RHS04093	NA	NA	NA	NA	NA	NA	NA
RHS04094	ETP54926.1/2.26318e-20/hypothetical protein F442_00471 [Phytophthora parasitica P10297]	O62761/6e-33/CHLE_PANTT Cholinesterase OS=Panthera tigris tigris OX=74535 GN=BCHE PE=2 SV=1	cre:CHLREDRAFT_111927/1e-09/predicted protein; K01049 acetylcholinesterase [EC:3.1.1.7]	Hs4557351/9e-29/[T] KOG4389 Acetylcholinesterase/Butyrylcholinesterase	A0A0D2PK74/1e-166/A0A0D2PK74_9AGAR Carboxylic ester hydrolase OS=Hypholoma sublateritium FD-334 SS-4 OX=945553 GN=HYPSUDRAFT_196943 PE=3 SV=1	PS51257/5.0/Prokaryotic membrane lipoprotein lipid attachment site profile.	molecular_function:GO:0016787//hydrolase activity;
RHS04095	OLP89656.1/3.92796e-28/Cholinesterase [Symbiodinium microadriaticum]	P22303/1e-36/ACES_HUMAN Acetylcholinesterase OS=Homo sapiens OX=9606 GN=ACHE PE=1 SV=1	cre:CHLREDRAFT_111927/1e-22/predicted protein; K01049 acetylcholinesterase [EC:3.1.1.7]	Hs7710112/6e-37/[T] KOG4389 Acetylcholinesterase/Butyrylcholinesterase	A0A0D2PK74/0.0/A0A0D2PK74_9AGAR Carboxylic ester hydrolase OS=Hypholoma sublateritium FD-334 SS-4 OX=945553 GN=HYPSUDRAFT_196943 PE=3 SV=1	PF00135/2.3E-64/Carboxylesterase family	NA
RHS04096	EEF26342.1/2.39882e-28/Para-nitrobenzyl esterase, putative, partial [Ricinus communis]	P81908/3e-29/CHLE_HORSE Cholinesterase OS=Equus caballus OX=9796 GN=BCHE PE=1 SV=1	cre:CHLREDRAFT_111927/4e-22/predicted protein; K01049 acetylcholinesterase [EC:3.1.1.7]	Hs4557351/2e-27/[T] KOG4389 Acetylcholinesterase/Butyrylcholinesterase	A0A409XNQ5/0.0/A0A409XNQ5_PSICY Carboxylic ester hydrolase OS=Psilocybe cyanescens OX=93625 GN=CVT25_008644 PE=3 SV=1	PF00135/2.0E-55/Carboxylesterase family	molecular_function:GO:0004104//cholinesterase activity;
RHS04097	NA	NA	NA	NA	A0A1J8R9I8/1e-124/A0A1J8R9I8_9AGAM Uncharacterized protein OS=Rhizopogon vesiculosus OX=180088 GN=AZE42_01606 PE=4 SV=1	NA	NA
RHS04098	XP_005779634.1/4.47498e-77/putative 3-hydroxyacyl-CoA dehydrogenase [Emiliania huxleyi CCMP1516] &gt;EOD27205.1 putative 3-hydroxyacyl-CoA dehydrogenase [Emiliania huxleyi CCMP1516]	Q16836/3e-47/HCDH_HUMAN Hydroxyacyl-coenzyme A dehydrogenase, mitochondrial OS=Homo sapiens OX=9606 GN=HADH PE=1 SV=3	ppp:112275170/9e-78/uncharacterized protein LOC112275170; K00074 3-hydroxybutyryl-CoA dehydrogenase [EC:1.1.1.157]	At3g15290/1e-65/[I] KOG2304 3-hydroxyacyl-CoA dehydrogenase	A0A067T991/0.0/A0A067T991_GALM3 Uncharacterized protein OS=Galerina marginata (strain CBS 339.88) OX=685588 GN=GALMADRAFT_140197 PE=4 SV=1	PF00725/9.8E-21/3-hydroxyacyl-CoA dehydrogenase, C-terminal domain	biological_process:GO:0006631//fatty acid metabolic process;cellular_component:GO:0005777//peroxisome;molecular_function:GO:0070403//NAD+ binding;GO:0003857//3-hydroxyacyl-CoA dehydrogenase activity;
RHS04099	NA	NA	NA	NA	A0A0C3BUI1/4e-10/A0A0C3BUI1_HEBCY Uncharacterized protein OS=Hebeloma cylindrosporum h7 OX=686832 GN=M413DRAFT_446521 PE=4 SV=1	NA	NA
RHS04100	NA	NA	NA	NA	A0A0C3BQA9/4e-19/A0A0C3BQA9_9AGAM Uncharacterized protein OS=Piloderma croceum F 1598 OX=765440 GN=PILCRDRAFT_2869 PE=4 SV=1	NA	NA
RHS04101	XP_016744163.1/1.56662e-13/PREDICTED: kynurenine formamidase-like [Gossypium hirsutum] &gt;XP_016744164.1 PREDICTED: kynurenine formamidase-like [Gossypium hirsutum] &gt;XP_016744165.1 PREDICTED: kynurenine formamidase-like [Gossypium hirsutum]	Q6YX89/5e-11/CYL4_ORYSJ Cyclase-like protein 4 OS=Oryza sativa subsp. japonica OX=39947 GN=CYL4 PE=2 SV=1	NA	NA	A0A0C3FRS9/3e-79/A0A0C3FRS9_9AGAM Uncharacterized protein OS=Piloderma croceum F 1598 OX=765440 GN=PILCRDRAFT_70557 PE=4 SV=1	PF04199/7.2E-36/Putative cyclase	biological_process:GO:0019441//tryptophan catabolic process to kynurenine;molecular_function:GO:0004061//arylformamidase activity;
RHS04102	XP_018836521.1/4.39467e-68/PREDICTED: probable sulfate transporter 4.2 isoform X1 [Juglans regia] &gt;XP_018836522.1 PREDICTED: probable sulfate transporter 4.2 isoform X2 [Juglans regia]	O59782/4e-78/SULH3_SCHPO Probable sulfate permease C320.05 OS=Schizosaccharomyces pombe (strain 972 / ATCC 24843) OX=284812 GN=SPCC320.05 PE=3 SV=1	jre:109003024/8e-69/probable sulfate transporter 4.2 isoform X1; K18059 sulfate transporter 4	YPR003c/8e-98/[P] KOG0236 Sulfate/bicarbonate/oxalate exchanger SAT-1 and related transporters (SLC26 family)	B0DXW8/0.0/B0DXW8_LACBS Sulfate anion transporter OS=Laccaria bicolor (strain S238N-H82 / ATCC MYA-4686) OX=486041 GN=LACBIDRAFT_313253 PE=3 SV=1	PF01740/5.0E-8/STAS domain	cellular_component:GO:0016021//integral component of membrane;molecular_function:GO:0008271//secondary active sulfate transmembrane transporter activity;
RHS04103	XP_005845904.1/1.19e-101/hypothetical protein CHLNCDRAFT_136492 [Chlorella variabilis] &gt;EFN53802.1 hypothetical protein CHLNCDRAFT_136492 [Chlorella variabilis]	NA	NA	NA	A0A067SZP8/0.0/A0A067SZP8_GALM3 Uncharacterized protein OS=Galerina marginata (strain CBS 339.88) OX=685588 GN=GALMADRAFT_484920 PE=4 SV=1	NA	NA
RHS04104	BAK00705.1/2.26494e-127/predicted protein [Hordeum vulgare subsp. vulgare]	Q9Y755/4e-159/PENC2_PENCI Subtilisin-like serine protease Pen c 2 OS=Penicillium citrinum OX=5077 PE=1 SV=1	apro:F751_3351/9e-26/Glyceraldehyde-3-phosphate dehydrogenase, cytosolic; K00134 glyceraldehyde 3-phosphate dehydrogenase [EC:1.2.1.12]	YEL060c/1e-141/[O] KOG1153 Subtilisin-related protease/Vacuolar protease B	A0A369JVD1/0.0/A0A369JVD1_HYPMA Subtilisin-like serine protease pepC OS=Hypsizygus marmoreus OX=39966 GN=pepC PE=3 SV=1	PF00082/2.2E-37/Subtilase family	cellular_component:GO:0016021//integral component of membrane;molecular_function:GO:0004252//serine-type endopeptidase activity;
RHS04105	NA	NA	NA	NA	A0A0C9XXY8/1e-67/A0A0C9XXY8_9AGAR Unplaced genomic scaffold K443scaffold_57, whole genome shotgun sequence OS=Laccaria amethystina LaAM-08-1 OX=1095629 GN=K443DRAFT_677566 PE=4 SV=1	NA	NA
RHS04106	NA	NA	NA	NA	A0A2R6NSF2/3e-103/A0A2R6NSF2_9APHY Uncharacterized protein OS=Phlebia centrifuga OX=98765 GN=PHLCEN_2v8768 PE=4 SV=1	PF08445/1.2E-7/FR47-like protein	NA
RHS04107	XP_002267602.2/3.3184e-24/PREDICTED: N-lysine methyltransferase setd6 isoform X1 [Vitis vinifera] &gt;CBI27707.3 unnamed protein product, partial [Vitis vinifera]	Q5ZK17/1e-15/SETD6_CHICK N-lysine methyltransferase SETD6 OS=Gallus gallus OX=9031 GN=SETD6 PE=2 SV=2	psom:113302790/9e-26/ribosomal lysine N-methyltransferase 3-like; K05302 N-lysine methyltransferase SETD6 [EC:2.1.1.-]	At3g56570/1e-17/[R] KOG1337 N-methyltransferase	A0A409VNV6/3e-125/A0A409VNV6_9AGAR Uncharacterized protein OS=Gymnopilus dilepis OX=231916 GN=CVT26_005834 PE=4 SV=1	PF00856/2.8E-7/SET domain	biological_process:GO:0018026//peptidyl-lysine monomethylation;molecular_function:GO:0016279//protein-lysine N-methyltransferase activity;
RHS04108	XP_005771152.1/8.53597e-109/hypothetical protein EMIHUDRAFT_118282 [Emiliania huxleyi CCMP1516] &gt;EOD18723.1 hypothetical protein EMIHUDRAFT_118282 [Emiliania huxleyi CCMP1516]	P06245/3e-143/KAPB_YEAST cAMP-dependent protein kinase type 2 OS=Saccharomyces cerevisiae (strain ATCC 204508 / S288c) OX=559292 GN=TPK2 PE=1 SV=2	csl:COCSUDRAFT_65594/5e-88/kinase-like protein; K19584 protein kinase X [EC:2.7.11.11]	YPL203w/1e-143/[T] KOG0616 cAMP-dependent protein kinase catalytic subunit (PKA)	A0A067SZQ3/0.0/A0A067SZQ3_GALM3 Uncharacterized protein OS=Galerina marginata (strain CBS 339.88) OX=685588 GN=GALMADRAFT_68410 PE=3 SV=1	PS50011/49.728/Protein kinase domain profile.	molecular_function:GO:0004674//protein serine/threonine kinase activity;GO:0005524//ATP binding;
RHS04109	XP_014525145.1/0/hypothetical protein JH06_4839 [Blastocystis sp. subtype 4] &gt;KNB41702.1 hypothetical protein JH06_4839 [Blastocystis sp. subtype 4]	P0CO18/0.0/SWR1_CRYNJ Helicase SWR1 OS=Cryptococcus neoformans var. neoformans serotype D (strain JEC21 / ATCC MYA-565) OX=214684 GN=SWR1 PE=3 SV=1	apro:F751_4930/3e-122/Helicase swr1; K11320 E1A-binding protein p400 [EC:3.6.4.-]	At3g12810/2e-120/[R] KOG0391 SNF2 family DNA-dependent ATPase	A0A067T972/0.0/A0A067T972_GALM3 Uncharacterized protein OS=Galerina marginata (strain CBS 339.88) OX=685588 GN=GALMADRAFT_247988 PE=4 SV=1	PF00271/4.3E-14/Helicase conserved C-terminal domain	molecular_function:GO:0005524//ATP binding;
RHS04110	NA	NA	NA	NA	A0A0C9WNA0/6e-25/A0A0C9WNA0_9AGAR Unplaced genomic scaffold K443scaffold_123, whole genome shotgun sequence OS=Laccaria amethystina LaAM-08-1 OX=1095629 GN=K443DRAFT_680351 PE=4 SV=1	NA	NA
RHS04111	CBJ31768.1/9.22184e-82/conserved unknown protein [Ectocarpus siliculosus]	P33303/2e-112/SFC1_YEAST Succinate/fumarate mitochondrial transporter OS=Saccharomyces cerevisiae (strain ATCC 204508 / S288c) OX=559292 GN=SFC1 PE=1 SV=2	han:110878218/2e-53/mitochondrial succinate-fumarate transporter 1-like; K15100 solute carrier family 25 (mitochondrial citrate transporter), member 1	YJR095w/1e-112/[C] KOG0756 Mitochondrial tricarboxylate/dicarboxylate carrier proteins	A0A1J8R1B0/0.0/A0A1J8R1B0_9AGAM Uncharacterized protein OS=Rhizopogon vesiculosus OX=180088 GN=AZE42_02266 PE=3 SV=1	PS51257/6.0/Prokaryotic membrane lipoprotein lipid attachment site profile.	biological_process:GO:0055085//transmembrane transport;cellular_component:GO:0016021//integral component of membrane;
RHS04112	XP_004290745.1/0/PREDICTED: transportin-1 [Fragaria vesca subsp. vesca]	Q3SYU7/0.0/TNPO1_BOVIN Transportin-1 OS=Bos taurus OX=9913 GN=TNPO1 PE=1 SV=2	fve:101294129/0.0/transportin-1; K18752 transportin-1	7295356/0.0/[YU] KOG2023 Nuclear transport receptor Karyopherin-beta2/Transportin (importin beta superfamily)	A0A369K0Z5/0.0/A0A369K0Z5_HYPMA Importin subunit beta-2 OS=Hypsizygus marmoreus OX=39966 GN=kap104 PE=4 SV=1	PF13513/2.4E-14/HEAT-like repeat	NA
RHS04113	NA	NA	NA	NA	D8QA77/3e-14/D8QA77_SCHCM Uncharacterized protein OS=Schizophyllum commune (strain H4-8 / FGSC 9210) OX=578458 GN=SCHCODRAFT_69199 PE=4 SV=1	NA	NA
RHS04114	XP_005829776.1/2.44096e-20/hypothetical protein GUITHDRAFT_164025 [Guillardia theta CCMP2712] &gt;EKX42796.1 hypothetical protein GUITHDRAFT_164025 [Guillardia theta CCMP2712]	O94401/4e-52/YQF8_SCHPO L-type lectin-like domain-containing protein C126.08c OS=Schizosaccharomyces pombe (strain 972 / ATCC 24843) OX=284812 GN=SPCC126.08c PE=3 SV=1	ccp:CHC_T00006152001/6e-10/hypothetical protein; K10080 lectin, mannose-binding 1	SPCC126.08c/2e-52/[U] KOG3839 Lectin VIP36, involved in the transport of glycoproteins carrying high mannose-type glycans	A0A3S8XGA3/1e-144/A0A3S8XGA3_PLEOS Lectin 7 OS=Pleurotus ostreatus OX=5322 PE=4 SV=1	PS51328/44.563/L-type lectin-like (leguminous) domain profile.	cellular_component:GO:0016021//integral component of membrane;
RHS04115	NA	NA	NA	NA	A0A2A9NS21/1e-14/A0A2A9NS21_9AGAR Uncharacterized protein OS=Amanita thiersii Skay4041 OX=703135 GN=AMATHDRAFT_3956 PE=4 SV=1	NA	NA
RHS04116	NA	NA	NA	NA	A0A369JR07/1e-98/A0A369JR07_HYPMA Uncharacterized protein OS=Hypsizygus marmoreus OX=39966 GN=Hypma_007448 PE=4 SV=1	PF13886/1.0E-11/Domain of unknown function (DUF4203)	NA
RHS04117	NA	NA	NA	NA	A0A409YJE6/3e-17/A0A409YJE6_9AGAR Uncharacterized protein OS=Gymnopilus dilepis OX=231916 GN=CVT26_004665 PE=4 SV=1	NA	NA
RHS04118	XP_010098674.1/7.80836e-11/Chaperone protein dnaJ 1 [Morus notabilis] &gt;EXB75577.1 Chaperone protein dnaJ 1 [Morus notabilis]	Q9QYJ0/8e-12/DNJA2_MOUSE DnaJ homolog subfamily A member 2 OS=Mus musculus OX=10090 GN=Dnaja2 PE=1 SV=1	ota:OT_ostta12g00410/2e-10/HSP40/DnaJ peptide-binding; K09510 DnaJ homolog subfamily B member 4	Hs5031741/3e-12/[O] KOG0712 Molecular chaperone (DnaJ superfamily)	A0A2A9NQ62/5e-114/A0A2A9NQ62_9AGAR Uncharacterized protein OS=Amanita thiersii Skay4041 OX=703135 GN=AMATHDRAFT_145074 PE=4 SV=1	PF00226/8.4E-14/DnaJ domain	biological_process:GO:0006457//protein folding;molecular_function:GO:0046872//metal ion binding;GO:0051082//unfolded protein binding;GO:0031072//heat shock protein binding;
RHS04119	NA	NA	NA	NA	A0A0C9XSP7/6e-57/A0A0C9XSP7_9AGAR Unplaced genomic scaffold K443scaffold_123, whole genome shotgun sequence OS=Laccaria amethystina LaAM-08-1 OX=1095629 GN=K443DRAFT_103146 PE=4 SV=1	NA	NA
RHS04120	OLQ12611.1/3.84913e-13/SET domain-containing protein 5 [Symbiodinium microadriaticum]	O74467/3e-14/SET5_SCHPO SET domain-containing protein 5 OS=Schizosaccharomyces pombe (strain 972 / ATCC 24843) OX=284812 GN=set5 PE=1 SV=1	ota:OT_ostta04g04410/2e-09/SET domain; K11426 SET and MYND domain-containing protein	SPCC1739.05/1e-14/[B] KOG2084 Predicted histone tail methylase containing SET domain	A0A409YJV9/4e-60/A0A409YJV9_9AGAR Uncharacterized protein OS=Gymnopilus dilepis OX=231916 GN=CVT26_008132 PE=4 SV=1	PF00856/2.5E-10/SET domain	NA
RHS04121	NA	NA	NA	NA	A0A369JZV6/8e-100/A0A369JZV6_HYPMA Uncharacterized protein OS=Hypsizygus marmoreus OX=39966 GN=Hypma_007984 PE=4 SV=1	NA	NA
RHS04122	NA	NA	NA	NA	NA	NA	NA
RHS04123	XP_002438562.1/3.30054e-56/tRNA A64-2&apos;-O-ribosylphosphate transferase [Sorghum bicolor] &gt;OQU76563.1 hypothetical protein SORBI_3010G166400 [Sorghum bicolor] &gt;OQU76564.1 hypothetical protein SORBI_3010G166400 [Sorghum bicolor]	Q10181/9e-48/YAW6_SCHPO Uncharacterized protein C3F10.06c OS=Schizosaccharomyces pombe (strain 972 / ATCC 24843) OX=284812 GN=SPAC3F10.06c PE=4 SV=1	sbi:8061963/6e-57/tRNA A64-2'-O-ribosylphosphate transferase; K15463 tRNA A64-2'-O-ribosylphosphate transferase [EC:2.4.2.-]	SPAC3F10.06c/4e-48/[A] KOG2634 Initiator tRNA phosphoribosyl-transferase	A0A409VGA7/3e-135/A0A409VGA7_9AGAR Uncharacterized protein OS=Gymnopilus dilepis OX=231916 GN=CVT26_000231 PE=4 SV=1	PF04179/1.5E-19/Rit1 DUSP-like domain	biological_process:GO:0019988//charged-tRNA amino acid modification;molecular_function:GO:0043399//tRNA A64-2'-O-ribosylphosphate transferase activity;
RHS04124	NA	NA	NA	NA	A0A0C3BHP9/6e-83/A0A0C3BHP9_HEBCY Uncharacterized protein OS=Hebeloma cylindrosporum h7 OX=686832 GN=M413DRAFT_31839 PE=4 SV=1	PF01400/2.9E-9/Astacin (Peptidase family M12A)	NA
RHS04125	XP_012898387.1/0/uncharacterized protein [Blastocystis hominis] &gt;CBK24339.2 unnamed protein product [Blastocystis hominis]	Q54N49/0.0/INO1_DICDI Inositol-3-phosphate synthase OS=Dictyostelium discoideum OX=44689 GN=ino1 PE=3 SV=1	cme:CYME_CMR036C/0.0/myo-inositol 1-phosphate synthase; K01858 myo-inositol-1-phosphate synthase [EC:5.5.1.4]	YJL153c/0.0/[I] KOG0693 Myo-inositol-1-phosphate synthase	A0A067T6U7/0.0/A0A067T6U7_GALM3 Uncharacterized protein OS=Galerina marginata (strain CBS 339.88) OX=685588 GN=GALMADRAFT_154800 PE=4 SV=1	PF01658/1.5E-42/Myo-inositol-1-phosphate synthase	biological_process:GO:0008654//phospholipid biosynthetic process;GO:0006021//inositol biosynthetic process;molecular_function:GO:0004512//inositol-3-phosphate synthase activity;
RHS04126	XP_005708391.1/3.73003e-52/mitochondrial presequence translocase subunit Tim50 [Galdieria sulphuraria] &gt;EME31871.1 mitochondrial presequence translocase subunit Tim50 [Galdieria sulphuraria]	P0CN66/7e-100/TIM50_CRYNJ Mitochondrial import inner membrane translocase subunit TIM50 OS=Cryptococcus neoformans var. neoformans serotype D (strain JEC21 / ATCC MYA-565) OX=214684 GN=TIM50 PE=3 SV=1	gsl:Gasu_09420/7e-53/mitochondrial presequence translocase subunit Tim50; K17496 mitochondrial import inner membrane translocase subunit TIM50	YPL063w/5e-58/[K] KOG2832 TFIIF-interacting CTD phosphatase, including NLI-interacting factor (involved in RNA polymerase II regulation)	A0A409Y072/0.0/A0A409Y072_9AGAR Mitochondrial import inner membrane translocase subunit TIM50 OS=Gymnopilus dilepis OX=231916 GN=CVT26_004987 PE=3 SV=1	PS50969/35.541/FCP1 homology domain profile.	biological_process:GO:0015031//protein transport;cellular_component:GO:0005744//mitochondrial inner membrane presequence translocase complex;GO:0016021//integral component of membrane;molecular_function:GO:0016791//phosphatase activity;
RHS04127	XP_009348163.1/1.01954e-82/PREDICTED: uncharacterized protein LOC103939772 [Pyrus x bretschneideri]	J4VWM7/1e-83/OPS4_BEAB2 FAD-dependent monooxygenase OpS4 OS=Beauveria bassiana (strain ARSEF 2860) OX=655819 GN=OpS4 PE=1 SV=1	pxb:103939772/2e-83/uncharacterized protein LOC103939772; K00480 salicylate hydroxylase [EC:1.14.13.1]	At5g11330/1e-14/[CR] KOG2614 Kynurenine 3-monooxygenase and related flavoprotein monooxygenases	A0A0C9XZ67/0.0/A0A0C9XZ67_9AGAR Unplaced genomic scaffold K443scaffold_77, whole genome shotgun sequence OS=Laccaria amethystina LaAM-08-1 OX=1095629 GN=K443DRAFT_132439 PE=4 SV=1	PR00420/3.5E-19/Aromatic-ring hydroxylase (flavoprotein monooxygenase) signature	NA
RHS04128	NA	NA	NA	NA	A0A0D2MAT5/0.0/A0A0D2MAT5_9AGAR Uncharacterized protein OS=Hypholoma sublateritium FD-334 SS-4 OX=945553 GN=HYPSUDRAFT_43199 PE=4 SV=1	PF00646/2.6E-4/F-box domain	NA
RHS04129	NA	NA	NA	NA	A0A369JEU4/1e-43/A0A369JEU4_HYPMA Uncharacterized protein OS=Hypsizygus marmoreus OX=39966 GN=Hypma_012246 PE=4 SV=1	NA	NA
RHS04130	NA	NA	NA	NA	A0A0C9Y6A8/6e-22/A0A0C9Y6A8_9AGAR Unplaced genomic scaffold K443scaffold_3, whole genome shotgun sequence OS=Laccaria amethystina LaAM-08-1 OX=1095629 GN=K443DRAFT_82565 PE=4 SV=1	NA	NA
RHS04131	XP_009523833.1/7.51545e-101/hypothetical protein PHYSODRAFT_350698 [Phytophthora sojae] &gt;EGZ21116.1 hypothetical protein PHYSODRAFT_350698 [Phytophthora sojae]	Q54QI4/6e-96/HGD_DICDI Homogentisate 1,2-dioxygenase OS=Dictyostelium discoideum OX=44689 GN=hgd PE=2 SV=1	vvi:100264043/7e-86/homogentisate 1,2-dioxygenase; K00451 homogentisate 1,2-dioxygenase [EC:1.13.11.5]	CE29602/4e-95/[E] KOG1417 Homogentisate 1,2-dioxygenase	A0A0C3C6X2/0.0/A0A0C3C6X2_HEBCY Uncharacterized protein OS=Hebeloma cylindrosporum h7 OX=686832 GN=M413DRAFT_198003 PE=4 SV=1	PF04209/9.7E-111/homogentisate 1,2-dioxygenase	biological_process:GO:0006570//tyrosine metabolic process;GO:0006559//L-phenylalanine catabolic process;molecular_function:GO:0004411//homogentisate 1,2-dioxygenase activity;
RHS04132	CBJ29572.1/4.73486e-16/similar to Rho GTPase activating protein 24 [Ectocarpus siliculosus]	Q69ZH9/2e-32/RHG23_MOUSE Rho GTPase-activating protein 23 OS=Mus musculus OX=10090 GN=Arhgap23 PE=1 SV=2	crb:17897036/8e-13/rho GTPase-activating protein 5; K20642 Rho GTPase-activating protein 22/24/25	Hs4757980/2e-29/[T] KOG1453 Chimaerin and related Rho GTPase activating proteins	A0A0C9XPG0/0.0/A0A0C9XPG0_9AGAR Unplaced genomic scaffold K443scaffold_45, whole genome shotgun sequence OS=Laccaria amethystina LaAM-08-1 OX=1095629 GN=K443DRAFT_676762 PE=4 SV=1	PF00617/3.8E-8/RasGEF domain	biological_process:GO:0007165//signal transduction;
RHS04133	NA	P53878/5e-16/YNS1_YEAST Uncharacterized oxidoreductase YNL181W OS=Saccharomyces cerevisiae (strain ATCC 204508 / S288c) OX=559292 GN=YNL181W PE=1 SV=2	NA	YNL181w/4e-17/[Q] KOG1208 Dehydrogenases with different specificities (related to short-chain alcohol dehydrogenases)	A0A0C2Z2L7/0.0/A0A0C2Z2L7_HEBCY Uncharacterized protein OS=Hebeloma cylindrosporum h7 OX=686832 GN=M413DRAFT_439175 PE=4 SV=1	NA	NA
RHS04134	XP_009523833.1/1.76262e-127/hypothetical protein PHYSODRAFT_350698 [Phytophthora sojae] &gt;EGZ21116.1 hypothetical protein PHYSODRAFT_350698 [Phytophthora sojae]	Q54QI4/3e-128/HGD_DICDI Homogentisate 1,2-dioxygenase OS=Dictyostelium discoideum OX=44689 GN=hgd PE=2 SV=1	vvi:100264043/3e-120/homogentisate 1,2-dioxygenase; K00451 homogentisate 1,2-dioxygenase [EC:1.13.11.5]	CE29602/6e-127/[E] KOG1417 Homogentisate 1,2-dioxygenase	A0A0C3C6X2/0.0/A0A0C3C6X2_HEBCY Uncharacterized protein OS=Hebeloma cylindrosporum h7 OX=686832 GN=M413DRAFT_198003 PE=4 SV=1	PF04209/3.9E-148/homogentisate 1,2-dioxygenase	biological_process:GO:0006570//tyrosine metabolic process;GO:0006559//L-phenylalanine catabolic process;molecular_function:GO:0004411//homogentisate 1,2-dioxygenase activity;
RHS04135	NA	NA	NA	NA	A0A067TCY9/3e-17/A0A067TCY9_GALM3 Uncharacterized protein OS=Galerina marginata (strain CBS 339.88) OX=685588 GN=GALMADRAFT_153365 PE=4 SV=1	NA	NA
RHS04136	XP_009523833.1/4.18773e-137/hypothetical protein PHYSODRAFT_350698 [Phytophthora sojae] &gt;EGZ21116.1 hypothetical protein PHYSODRAFT_350698 [Phytophthora sojae]	Q00667/3e-134/HGD_EMENI Homogentisate 1,2-dioxygenase OS=Emericella nidulans (strain FGSC A4 / ATCC 38163 / CBS 112.46 / NRRL 194 / M139) OX=227321 GN=hmgA PE=2 SV=1	dosa:Os06t0103300-01/6e-129/Os06g0103300; Similar to Homogentisate 1,2-dioxygenase (EC 1.13.11.5) (Homogentisicase) (Homogentisate oxygenase) (Homogentisic acid oxidase).; K00451 homogentisate 1,2-dioxygenase [EC:1.13.11.5]	CE29602/8e-134/[E] KOG1417 Homogentisate 1,2-dioxygenase	A0A0C3C6X2/0.0/A0A0C3C6X2_HEBCY Uncharacterized protein OS=Hebeloma cylindrosporum h7 OX=686832 GN=M413DRAFT_198003 PE=4 SV=1	PF04209/7.9E-156/homogentisate 1,2-dioxygenase	biological_process:GO:0006570//tyrosine metabolic process;GO:0006559//L-phenylalanine catabolic process;molecular_function:GO:0004411//homogentisate 1,2-dioxygenase activity;
RHS04137	XP_008890853.1/1.08813e-134/homogentisate 1,2-dioxygenase [Phytophthora parasitica INRA-310] &gt;ETI56201.1 homogentisate 1,2-dioxygenase [Phytophthora parasitica P1569] &gt;ETK96023.1 homogentisate 1,2-dioxygenase [Phytophthora parasitica] &gt;ETL49383.1 homogentisate 1,2-dioxygenase [Phytophthora parasitica] &gt;ETM02433.1 homogentisate 1,2-dioxygenase [Phytophthora parasitica] &gt;ETM55706.1 h…	Q9Y041/9e-133/HGD_CAEEL Homogentisate 1,2-dioxygenase OS=Caenorhabditis elegans OX=6239 GN=hgo-1 PE=2 SV=2	vvi:100264043/3e-127/homogentisate 1,2-dioxygenase; K00451 homogentisate 1,2-dioxygenase [EC:1.13.11.5]	CE29602/4e-133/[E] KOG1417 Homogentisate 1,2-dioxygenase	A0A067TIC2/0.0/A0A067TIC2_GALM3 Uncharacterized protein OS=Galerina marginata (strain CBS 339.88) OX=685588 GN=GALMADRAFT_93814 PE=4 SV=1	PF04209/7.3E-152/homogentisate 1,2-dioxygenase	biological_process:GO:0006570//tyrosine metabolic process;GO:0006559//L-phenylalanine catabolic process;molecular_function:GO:0004411//homogentisate 1,2-dioxygenase activity;
RHS04138	NA	NA	NA	NA	NA	NA	NA
RHS04139	XP_009523833.1/2.07361e-139/hypothetical protein PHYSODRAFT_350698 [Phytophthora sojae] &gt;EGZ21116.1 hypothetical protein PHYSODRAFT_350698 [Phytophthora sojae]	Q9Y041/3e-137/HGD_CAEEL Homogentisate 1,2-dioxygenase OS=Caenorhabditis elegans OX=6239 GN=hgo-1 PE=2 SV=2	vvi:100264043/2e-130/homogentisate 1,2-dioxygenase; K00451 homogentisate 1,2-dioxygenase [EC:1.13.11.5]	CE29602/1e-137/[E] KOG1417 Homogentisate 1,2-dioxygenase	A0A0C3C6X2/0.0/A0A0C3C6X2_HEBCY Uncharacterized protein OS=Hebeloma cylindrosporum h7 OX=686832 GN=M413DRAFT_198003 PE=4 SV=1	PF04209/2.0E-156/homogentisate 1,2-dioxygenase	biological_process:GO:0006570//tyrosine metabolic process;GO:0006559//L-phenylalanine catabolic process;molecular_function:GO:0004411//homogentisate 1,2-dioxygenase activity;
RHS04140	NA	NA	NA	NA	A0A0C9X1K6/1e-20/A0A0C9X1K6_9AGAR Unplaced genomic scaffold K443scaffold_230, whole genome shotgun sequence OS=Laccaria amethystina LaAM-08-1 OX=1095629 GN=K443DRAFT_337299 PE=4 SV=1	NA	NA
RHS04141	XP_005830650.1/1.07095e-48/hypothetical protein GUITHDRAFT_140413 [Guillardia theta CCMP2712] &gt;EKX43670.1 hypothetical protein GUITHDRAFT_140413 [Guillardia theta CCMP2712]	P10901/6e-54/FUCO_DICDI Alpha-L-fucosidase OS=Dictyostelium discoideum OX=44689 GN=alfA PE=3 SV=1	zma:100285202/2e-06/alpha-L-fucosidase 1 precursor; K01206 alpha-L-fucosidase [EC:3.2.1.51]	Hs14042931/5e-50/[G] KOG3340 Alpha-L-fucosidase	A0A369JFU4/0.0/A0A369JFU4_HYPMA Alpha-L-fucosidase OS=Hypsizygus marmoreus OX=39966 GN=alfA PE=4 SV=1	PF01120/2.5E-80/Alpha-L-fucosidase	biological_process:GO:0006004//fucose metabolic process;molecular_function:GO:0004560//alpha-L-fucosidase activity;
RHS04142	NA	O74758/1e-22/YBE3_SCHPO Uncharacterized protein C17D11.03c OS=Schizosaccharomyces pombe (strain 972 / ATCC 24843) OX=284812 GN=SPBC17D11.03c PE=4 SV=1	NA	NA	A0A284RYS8/9e-104/A0A284RYS8_9AGAR Uncharacterized protein OS=Armillaria ostoyae OX=47428 GN=ARMOST_17374 PE=4 SV=1	NA	NA
RHS04143	NA	NA	NA	NA	A0A067PB43/8e-16/A0A067PB43_PLEOS Uncharacterized protein OS=Pleurotus ostreatus PC15 OX=1137138 GN=PLEOSDRAFT_1099093 PE=4 SV=1	PF12937/6.4E-9/F-box-like	NA
RHS04144	NA	NA	NA	NA	A0A0C9XEU2/0.0/A0A0C9XEU2_9AGAR Unplaced genomic scaffold K443scaffold_45, whole genome shotgun sequence OS=Laccaria amethystina LaAM-08-1 OX=1095629 GN=K443DRAFT_653612 PE=4 SV=1	NA	NA
RHS04145	NA	NA	NA	NA	NA	NA	NA
RHS04146	NA	Q9USJ8/3e-47/CTK3_SCHPO CTD kinase subunit gamma OS=Schizosaccharomyces pombe (strain 972 / ATCC 24843) OX=284812 GN=ctk3 PE=1 SV=1	NA	NA	A0A0C2SHB2/1e-147/A0A0C2SHB2_AMAMU Uncharacterized protein OS=Amanita muscaria Koide BX008 OX=946122 GN=M378DRAFT_81214 PE=4 SV=1	PS51391/28.023/CID domain profile.	NA
RHS04147	XP_009350744.1/0/PREDICTED: U3 small nucleolar RNA-associated protein 20-like [Pyrus x bretschneideri]	O60055/0.0/UTP20_SCHPO U3 small nucleolar RNA-associated protein 20 OS=Schizosaccharomyces pombe (strain 972 / ATCC 24843) OX=284812 GN=utp20 PE=3 SV=1	pxb:103942282/0.0/U3 small nucleolar RNA-associated protein 20-like; K14772 U3 small nucleolar RNA-associated protein 20	SPBC56F2.04/0.0/[V] KOG1823 DRIM (Down-regulated in metastasis)-like proteins	A0A0C9XCE9/0.0/A0A0C9XCE9_9AGAR Unplaced genomic scaffold K443scaffold_57, whole genome shotgun sequence OS=Laccaria amethystina LaAM-08-1 OX=1095629 GN=K443DRAFT_677583 PE=4 SV=1	PF07539/4.2E-176/Down-regulated in metastasis	NA
RHS04148	XP_009531839.1/2.02846e-101/hypothetical protein PHYSODRAFT_516057 [Phytophthora sojae] &gt;EGZ11506.1 hypothetical protein PHYSODRAFT_516057 [Phytophthora sojae]	Q9P885/9e-121/GGPPS_MUCCL Geranylgeranyl pyrophosphate synthase OS=Mucor circinelloides f. lusitanicus OX=29924 GN=carG PE=1 SV=1	cme:CYME_CMK058C/1e-13/geranylgeranyl diphosphate synthase, chloroplast precursor; K13789 geranylgeranyl diphosphate synthase, type II [EC:2.5.1.1 2.5.1.10 2.5.1.29]	Hs4758430/6e-96/[H] KOG0777 Geranylgeranyl pyrophosphate synthase/Polyprenyl synthetase	A0A409XBW3/0.0/A0A409XBW3_PSICY Uncharacterized protein OS=Psilocybe cyanescens OX=93625 GN=CVT25_005436 PE=3 SV=1	PF00348/2.9E-63/Polyprenyl synthetase	biological_process:GO:0008299//isoprenoid biosynthetic process;molecular_function:GO:0016740//transferase activity;
RHS04149	GAX85390.1/1.1175e-45/hypothetical protein CEUSTIGMA_g12806.t1 [Chlamydomonas eustigma]	Q800G5/6e-28/MXE_DANRE Interferon-induced GTP-binding protein MxE OS=Danio rerio OX=7955 GN=mxe PE=2 SV=1	tcc:18606108/3e-22/dynamin-related protein 1E; K01528 dynamin GTPase [EC:3.6.5.5]	At5g42080/4e-22/[UR] KOG0446 Vacuolar sorting protein VPS1, dynamin, and related proteins	A0A0C9XLT4/0.0/A0A0C9XLT4_9AGAR Unplaced genomic scaffold K443scaffold_57, whole genome shotgun sequence OS=Laccaria amethystina LaAM-08-1 OX=1095629 GN=K443DRAFT_131832 PE=3 SV=1	PS51388/16.695/GED domain profile.	molecular_function:GO:0005525//GTP binding;GO:0003924//GTPase activity;
RHS04150	NA	NA	NA	NA	A0A0C9XL64/2e-52/A0A0C9XL64_9AGAR Unplaced genomic scaffold K443scaffold_22, whole genome shotgun sequence OS=Laccaria amethystina LaAM-08-1 OX=1095629 GN=K443DRAFT_3580 PE=4 SV=1	PF12937/1.6E-6/F-box-like	NA
RHS04151	GAX85390.1/3.44922e-66/hypothetical protein CEUSTIGMA_g12806.t1 [Chlamydomonas eustigma]	Q91196/3e-42/MX2_ONCMY Interferon-induced GTP-binding protein Mx2 OS=Oncorhynchus mykiss OX=8022 GN=mx2 PE=2 SV=1	sita:101765437/2e-30/dynamin-related protein 3B; K17065 dynamin 1-like protein [EC:3.6.5.5]	Hs11342664/9e-38/[UR] KOG0446 Vacuolar sorting protein VPS1, dynamin, and related proteins	A0A0C9XLT4/0.0/A0A0C9XLT4_9AGAR Unplaced genomic scaffold K443scaffold_57, whole genome shotgun sequence OS=Laccaria amethystina LaAM-08-1 OX=1095629 GN=K443DRAFT_131832 PE=3 SV=1	PF01031/3.3E-13/Dynamin central region	molecular_function:GO:0005525//GTP binding;GO:0003924//GTPase activity;
RHS04152	KDD77134.1/2.98673e-34/neutral/alkaline non-lysosomal ceramidase, partial [Helicosporidium sp. ATCC 50920]	Q9VA70/8e-29/NCASE_DROME Neutral ceramidase OS=Drosophila melanogaster OX=7227 GN=CDase PE=1 SV=1	csl:COCSUDRAFT_43643/9e-33/Neutral/alkaline nonlysosomal ceramidase; K12349 neutral ceramidase [EC:3.5.1.23]	7301946/4e-29/[T] KOG2232 Ceramidases	A0A067NWG4/6e-67/A0A067NWG4_PLEOS Neutral ceramidase OS=Pleurotus ostreatus PC15 OX=1137138 GN=PLEOSDRAFT_1065698 PE=3 SV=1	PF04734/3.0E-43/Neutral/alkaline non-lysosomal ceramidase, N-terminal	cellular_component:GO:0016021//integral component of membrane;
RHS04153	NA	NA	NA	NA	A0A409WNM1/4e-10/A0A409WNM1_PSICY Neutral ceramidase OS=Psilocybe cyanescens OX=93625 GN=CVT25_001471 PE=3 SV=1	NA	NA
RHS04154	XP_005645255.1/8.88729e-41/Neutral/alkaline nonlysosomal ceramidase [Coccomyxa subellipsoidea C-169] &gt;EIE20711.1 Neutral/alkaline nonlysosomal ceramidase [Coccomyxa subellipsoidea C-169]	F4KHQ8/2e-33/NCER3_ARATH Neutral ceramidase 3 OS=Arabidopsis thaliana OX=3702 GN=NCER3 PE=2 SV=1	csl:COCSUDRAFT_43643/2e-41/Neutral/alkaline nonlysosomal ceramidase; K12349 neutral ceramidase [EC:3.5.1.23]	At5g58980/1e-33/[T] KOG2232 Ceramidases	A0A0C2Y6X0/3e-109/A0A0C2Y6X0_HEBCY Neutral ceramidase OS=Hebeloma cylindrosporum h7 OX=686832 GN=M413DRAFT_20430 PE=3 SV=1	PF04734/2.4E-20/Neutral/alkaline non-lysosomal ceramidase, N-terminal	cellular_component:GO:0016021//integral component of membrane;
RHS04155	NA	NA	NA	NA	A0A369JMR6/3e-99/A0A369JMR6_HYPMA Uncharacterized protein OS=Hypsizygus marmoreus OX=39966 GN=Hypma_012202 PE=4 SV=1	NA	NA
RHS04156	NA	B6H7F3/5e-10/ABAA_PENRW Conidiophore development regulator abaA OS=Penicillium rubens (strain ATCC 28089 / DSM 1075 / NRRL 1951 / Wisconsin 54-1255) OX=500485 GN=abaA PE=2 SV=1	NA	NA	A0A0C3BXJ4/6e-135/A0A0C3BXJ4_HEBCY Uncharacterized protein OS=Hebeloma cylindrosporum h7 OX=686832 GN=M413DRAFT_448921 PE=4 SV=1	PS51088/21.193/TEA domain profile.	NA
RHS04157	CBJ27054.1/1.21091e-28/Exo-1,3-beta-glucanase, family GH5 [Ectocarpus siliculosus]	Q0CHZ8/2e-79/EXGD_ASPTN Probable glucan 1,3-beta-glucosidase D OS=Aspergillus terreus (strain NIH 2624 / FGSC A1156) OX=341663 GN=exgD PE=3 SV=1	ini:109180163/4e-08/probable glucan 1,3-beta-glucosidase A; K01210 glucan 1,3-beta-glucosidase [EC:3.2.1.58]	NA	A0A0D0BMM6/0.0/A0A0D0BMM6_9AGAR Unplaced genomic scaffold GYMLUscaffold_52, whole genome shotgun sequence OS=Gymnopus luxurians FD-317 M1 OX=944289 GN=GYMLUDRAFT_47371 PE=4 SV=1	PF00150/5.6E-7/Cellulase (glycosyl hydrolase family 5)	biological_process:GO:0005975//carbohydrate metabolic process;cellular_component:GO:0016021//integral component of membrane;molecular_function:GO:0004553//hydrolase activity, hydrolyzing O-glycosyl compounds;
RHS04158	NA	NA	NA	NA	A0A0C9XL68/5e-111/A0A0C9XL68_9AGAR Unplaced genomic scaffold K443scaffold_22, whole genome shotgun sequence OS=Laccaria amethystina LaAM-08-1 OX=1095629 GN=K443DRAFT_674861 PE=4 SV=1	PF04696/2.3E-13/pinin/SDK/memA/ protein conserved region	NA
RHS04159	XP_005649891.1/2.51903e-15/hypothetical protein COCSUDRAFT_65205 [Coccomyxa subellipsoidea C-169] &gt;EIE25347.1 hypothetical protein COCSUDRAFT_65205 [Coccomyxa subellipsoidea C-169]	Q54EP7/1e-11/SRP72_DICDI Signal recognition particle subunit SRP72 OS=Dictyostelium discoideum OX=44689 GN=srp72 PE=3 SV=1	lang:109362565/5e-13/signal recognition particle subunit SRP72-like; K03108 signal recognition particle subunit SRP72	At1g67680/1e-10/[U] KOG2376 Signal recognition particle, subunit Srp72	A0A067SG43/9e-132/A0A067SG43_GALM3 Uncharacterized protein OS=Galerina marginata (strain CBS 339.88) OX=685588 GN=GALMADRAFT_77126 PE=4 SV=1	PF17004/8.0E-14/Putative TPR-like repeat	biological_process:GO:0006614//SRP-dependent cotranslational protein targeting to membrane;cellular_component:GO:0005786//signal recognition particle, endoplasmic reticulum targeting;GO:0005622//intracellular;molecular_function:GO:0008312//7S RNA binding;
RHS04160	GAQ78572.1/5.34034e-15/acid phosphatase [Klebsormidium nitens]	NA	NA	NA	A0A2A9NS07/0.0/A0A2A9NS07_9AGAR Uncharacterized protein OS=Amanita thiersii Skay4041 OX=703135 GN=AMATHDRAFT_60983 PE=4 SV=1	NA	NA
RHS04161	NA	NA	NA	NA	A0A0C9XL64/6e-67/A0A0C9XL64_9AGAR Unplaced genomic scaffold K443scaffold_22, whole genome shotgun sequence OS=Laccaria amethystina LaAM-08-1 OX=1095629 GN=K443DRAFT_3580 PE=4 SV=1	PF12937/1.5E-6/F-box-like	NA
RHS04162	NA	NA	NA	NA	NA	NA	NA
RHS04163	NA	NA	NA	NA	A0A137QCJ3/6e-07/A0A137QCJ3_9AGAR Uncharacterized protein OS=Leucoagaricus sp. SymC.cos OX=1714833 GN=AN958_11919 PE=4 SV=1	NA	NA
RHS04164	NA	NA	NA	NA	A0A0C9XL64/1e-52/A0A0C9XL64_9AGAR Unplaced genomic scaffold K443scaffold_22, whole genome shotgun sequence OS=Laccaria amethystina LaAM-08-1 OX=1095629 GN=K443DRAFT_3580 PE=4 SV=1	PF12937/1.1E-6/F-box-like	NA
RHS04165	XP_005648551.1/1.16137e-89/hypothetical protein COCSUDRAFT_62533 [Coccomyxa subellipsoidea C-169] &gt;EIE24007.1 hypothetical protein COCSUDRAFT_62533 [Coccomyxa subellipsoidea C-169]	NA	pavi:110766748/5e-18/uncharacterized protein LOC110766748; K07456 DNA mismatch repair protein MutS2	NA	A0A369JN13/0.0/A0A369JN13_HYPMA Uncharacterized protein OS=Hypsizygus marmoreus OX=39966 GN=Hypma_012210 PE=4 SV=1	PF11443/5.8E-210/Domain of unknown function (DUF2828)	NA
RHS04166	XP_008388756.1/0/PREDICTED: eIF-2-alpha kinase activator GCN1 isoform X2 [Malus domestica]	P33892/0.0/GCN1_YEAST eIF-2-alpha kinase activator GCN1 OS=Saccharomyces cerevisiae (strain ATCC 204508 / S288c) OX=559292 GN=GCN1 PE=1 SV=1	ota:OT_ostta02g05070/5e-40/ABC transporter, conserved site; K03235 elongation factor 3	YGL195w/0.0/[J] KOG1242 Protein containing adaptin N-terminal region	A0A067SQA7/0.0/A0A067SQA7_GALM3 Uncharacterized protein OS=Galerina marginata (strain CBS 339.88) OX=685588 GN=GALMADRAFT_913484 PE=4 SV=1	PF12074/8.0E-84/Domain of unknown function (DUF3554)	NA
RHS04167	NA	NA	NA	NA	A0A369JM57/1e-32/A0A369JM57_HYPMA Stress-associated endoplasmic reticulum protein OS=Hypsizygus marmoreus OX=39966 GN=Hypma_012214 PE=3 SV=1	NA	NA
RHS04168	OLQ03578.1/3.19507e-33/putative isomerase YraM [Symbiodinium microadriaticum]	A0A0U2X0E4/3e-32/ADI1_USTMD Aconitate-delta-isomerase 1 OS=Ustilago maydis OX=5270 GN=ADI1 PE=1 SV=1	NA	NA	A0A2H3DG33/2e-180/A0A2H3DG33_ARMGA DUF453 domain-containing protein OS=Armillaria gallica OX=47427 GN=ARMGADRAFT_298067 PE=4 SV=1	PF04303/8.7E-79/PrpF protein	NA
RHS04169	XP_002990983.1/1.59486e-14/hypothetical protein SELMODRAFT_132594 [Selaginella moellendorffii] &gt;EFJ08027.1 hypothetical protein SELMODRAFT_132594 [Selaginella moellendorffii]	O59681/4e-15/YBS1_SCHPO Uncharacterized protein C18E5.01 OS=Schizosaccharomyces pombe (strain 972 / ATCC 24843) OX=284812 GN=SPBC18E5.01 PE=3 SV=1	NA	NA	A0A409XKL3/2e-161/A0A409XKL3_PSICY Uncharacterized protein OS=Psilocybe cyanescens OX=93625 GN=CVT25_006373 PE=4 SV=1	PF10282/8.1E-51/Lactonase, 7-bladed beta-propeller	NA
RHS04170	KUF76959.1/2.78554e-131/hypothetical protein AM587_10007414 [Phytophthora nicotianae]	Q7TNE1/5e-57/SUCHY_MOUSE Succinate--hydroxymethylglutarate CoA-transferase OS=Mus musculus OX=10090 GN=Sugct PE=1 SV=2	gsl:Gasu_01030/3e-60/CoA-transferase family protein; K18703 succinate---hydroxymethylglutarate CoA-transferase [EC:2.8.3.13]	7300628/4e-58/[I] KOG3957 Predicted L-carnitine dehydratase/alpha-methylacyl-CoA racemase	A0A369JK50/0.0/A0A369JK50_HYPMA Succinyl-CoA--D-citramalate CoA-transferase OS=Hypsizygus marmoreus OX=39966 GN=Hypma_012211 PE=4 SV=1	PF02515/1.4E-103/CoA-transferase family III	molecular_function:GO:0016740//transferase activity;GO:0003824//catalytic activity;
RHS04171	NA	NA	NA	NA	NA	NA	NA
RHS04172	OQR93798.1/1.63847e-81/3-methyl-2-oxobutanoate hydroxymethyltransferase [Thraustotheca clavata]	Q9Y7B6/9e-87/PANB_EMENI 3-methyl-2-oxobutanoate hydroxymethyltransferase OS=Emericella nidulans (strain FGSC A4 / ATCC 38163 / CBS 112.46 / NRRL 194 / M139) OX=227321 GN=panB PE=3 SV=1	gsl:Gasu_13400/5e-82/3-methyl-2-oxobutanoate hydroxymethyltransferase; K00606 3-methyl-2-oxobutanoate hydroxymethyltransferase [EC:2.1.2.11]	At2g46110/1e-77/[H] KOG2949 Ketopantoate hydroxymethyltransferase	A0A0C9YC72/3e-172/A0A0C9YC72_9AGAR 3-methyl-2-oxobutanoate hydroxymethyltransferase OS=Laccaria amethystina LaAM-08-1 OX=1095629 GN=K443DRAFT_674833 PE=3 SV=1	TIGR00222/8.2E-83/panB: 3-methyl-2-oxobutanoate hydroxymethyltransferase	biological_process:GO:0015940//pantothenate biosynthetic process;molecular_function:GO:0003864//3-methyl-2-oxobutanoate hydroxymethyltransferase activity;GO:0008168//methyltransferase activity;
RHS04173	NA	NA	NA	NA	A0A0C2Y6W6/4e-59/A0A0C2Y6W6_HEBCY Uncharacterized protein OS=Hebeloma cylindrosporum h7 OX=686832 GN=M413DRAFT_448909 PE=4 SV=1	PS50097/9.682/BTB domain profile.	NA
RHS04174	XP_002960444.1/1.62699e-33/hypothetical protein SELMODRAFT_73523 [Selaginella moellendorffii] &gt;EFJ37983.1 hypothetical protein SELMODRAFT_73523 [Selaginella moellendorffii]	O13716/7e-63/AGN1_SCHPO Glucan endo-1,3-alpha-glucosidase agn1 OS=Schizosaccharomyces pombe (strain 972 / ATCC 24843) OX=284812 GN=agn1 PE=1 SV=2	smo:SELMODRAFT_73523/3e-34/hypothetical protein; K08254 glucan endo-1,3-alpha-glucosidase [EC:3.2.1.59]	NA	A0A409YV18/0.0/A0A409YV18_9AGAR Uncharacterized protein OS=Gymnopilus dilepis OX=231916 GN=CVT26_003989 PE=4 SV=1	PF03659/3.4E-68/Glycosyl hydrolase family 71	molecular_function:GO:0016787//hydrolase activity;
RHS04175	GAX85982.1/7.88169e-63/hypothetical protein CEUSTIGMA_g13398.t1 [Chlamydomonas eustigma]	Q800G5/7e-44/MXE_DANRE Interferon-induced GTP-binding protein MxE OS=Danio rerio OX=7955 GN=mxe PE=2 SV=1	tcc:18606108/5e-32/dynamin-related protein 1E; K01528 dynamin GTPase [EC:3.6.5.5]	Hs11342664/3e-37/[UR] KOG0446 Vacuolar sorting protein VPS1, dynamin, and related proteins	A0A0C9XLT4/0.0/A0A0C9XLT4_9AGAR Unplaced genomic scaffold K443scaffold_57, whole genome shotgun sequence OS=Laccaria amethystina LaAM-08-1 OX=1095629 GN=K443DRAFT_131832 PE=3 SV=1	PF01031/2.8E-21/Dynamin central region	NA
RHS04176	NA	NA	NA	NA	A0A0C2TBC9/2e-31/A0A0C2TBC9_AMAMU Uncharacterized protein OS=Amanita muscaria Koide BX008 OX=946122 GN=M378DRAFT_641515 PE=4 SV=1	NA	NA
RHS04177	NA	NA	NA	NA	A0A369K1H0/5e-104/A0A369K1H0_HYPMA Uncharacterized protein OS=Hypsizygus marmoreus OX=39966 GN=Hypma_006187 PE=4 SV=1	PF00651/3.3E-7/BTB/POZ domain	NA
RHS04178	NA	NA	NA	NA	A0A0C2Y6W6/1e-49/A0A0C2Y6W6_HEBCY Uncharacterized protein OS=Hebeloma cylindrosporum h7 OX=686832 GN=M413DRAFT_448909 PE=4 SV=1	PF00651/2.6E-5/BTB/POZ domain	NA
RHS04179	NA	NA	NA	NA	A0A1C7LYX3/2e-76/A0A1C7LYX3_GRIFR Uncharacterized protein OS=Grifola frondosa OX=5627 GN=A0H81_10110 PE=4 SV=1	PF00651/1.0E-5/BTB/POZ domain	NA
RHS04180	XP_005781953.1/6.51234e-28/hypothetical protein EMIHUDRAFT_365859 [Emiliania huxleyi CCMP1516] &gt;EOD29524.1 hypothetical protein EMIHUDRAFT_365859 [Emiliania huxleyi CCMP1516]	NA	NA	NA	A0A0C9X0Y4/5e-114/A0A0C9X0Y4_9AGAR Unplaced genomic scaffold K443scaffold_22, whole genome shotgun sequence OS=Laccaria amethystina LaAM-08-1 OX=1095629 GN=K443DRAFT_90661 PE=4 SV=1	PF10021/1.5E-37/Uncharacterized protein conserved in bacteria (DUF2263)	cellular_component:GO:0005634//nucleus;
RHS04181	NA	NA	NA	NA	A0A1Q3ELP1/3e-20/A0A1Q3ELP1_LENED Transmembrane protein OS=Lentinula edodes OX=5353 GN=LENED_010151 PE=4 SV=1	NA	NA
RHS04182	NA	NA	NA	NA	A0A369JVA7/9e-16/A0A369JVA7_HYPMA Uncharacterized protein OS=Hypsizygus marmoreus OX=39966 GN=Hypma_007979 PE=4 SV=1	NA	NA
RHS04183	NA	NA	NA	NA	A0A369K2N8/3e-49/A0A369K2N8_HYPMA Uncharacterized protein OS=Hypsizygus marmoreus OX=39966 GN=Hypma_007981 PE=4 SV=1	NA	NA
RHS04184	NA	NA	NA	NA	A0A409YUQ9/1e-27/A0A409YUQ9_9AGAR Uncharacterized protein OS=Gymnopilus dilepis OX=231916 GN=CVT26_003918 PE=4 SV=1	NA	NA
RHS04185	BAK05526.1/6.45798e-92/predicted protein [Hordeum vulgare subsp. vulgare]	P23641/1e-90/MPCP_YEAST Mitochondrial phosphate carrier protein OS=Saccharomyces cerevisiae (strain ATCC 204508 / S288c) OX=559292 GN=MIR1 PE=1 SV=1	bpg:Bathy09g00630/2e-78/mitochondrial phosphate carrier protein; K15102 solute carrier family 25 (mitochondrial phosphate transporter), member 3	YJR077c/4e-91/[C] KOG0767 Mitochondrial phosphate carrier protein	A0A067TID3/0.0/A0A067TID3_GALM3 Uncharacterized protein OS=Galerina marginata (strain CBS 339.88) OX=685588 GN=GALMADRAFT_113088 PE=3 SV=1	PS50920/13.696/Solute carrier (Solcar) repeat profile.	biological_process:GO:0006810//transport;GO:0055085//transmembrane transport;GO:0035435//phosphate ion transmembrane transport;GO:0006839//mitochondrial transport;cellular_component:GO:0016021//integral component of membrane;GO:0031305//integral component of mitochondrial inner membrane;molecular_function:GO:0022857//transmembrane transporter activity;
RHS04186	NA	NA	NA	NA	A0A2A9P0N3/8e-41/A0A2A9P0N3_9AGAR Uncharacterized protein OS=Amanita thiersii Skay4041 OX=703135 GN=AMATHDRAFT_53953 PE=4 SV=1	PS51725/9.972/ABM domain profile.	NA
RHS04187	GAQ89144.1/1.88509e-24/hypothetical protein KFL_004910020 [Klebsormidium nitens]	F8P9P5/0.0/NPS11_SERL9 Adenylate-forming reductase Nps11 OS=Serpula lacrymans var. lacrymans (strain S7.9) OX=578457 GN=nps11 PE=2 SV=2	mng:MNEG_13734/3e-06/Fatty acyl-CoA reductase 1; K13356 alcohol-forming fatty acyl-CoA reductase [EC:1.2.1.84]	YBR115c/4e-14/[Q] KOG1178 Non-ribosomal peptide synthetase/alpha-aminoadipate reductase and related enzymes	A0A0L6WG33/0.0/A0A0L6WG33_9AGAR Linear gramicidin synthase subunit D OS=Termitomyces sp. J132 OX=1306850 GN=J132_08344 PE=4 SV=1	PF00501/9.9E-29/AMP-binding enzyme	biological_process:GO:0009058//biosynthetic process;molecular_function:GO:0016788//hydrolase activity, acting on ester bonds;
RHS04188	CBN78806.1/1.08925e-15/nonribosomal peptide synthetase 10 [Ectocarpus siliculosus]	F8P2C8/0.0/NPS9_SERL9 Adenylate-forming reductase Nps9 OS=Serpula lacrymans var. lacrymans (strain S7.9) OX=578457 GN=nps9 PE=2 SV=2	han:110890194/6e-10/4-coumarate--CoA ligase-like 5; K10526 OPC-8:0 CoA ligase 1 [EC:6.2.1.-]	SPAP7G5.04c/1e-17/[Q] KOG1178 Non-ribosomal peptide synthetase/alpha-aminoadipate reductase and related enzymes	A0A0L6WG33/0.0/A0A0L6WG33_9AGAR Linear gramicidin synthase subunit D OS=Termitomyces sp. J132 OX=1306850 GN=J132_08344 PE=4 SV=1	PF07993/2.9E-34/Male sterility protein	biological_process:GO:0009058//biosynthetic process;molecular_function:GO:0016788//hydrolase activity, acting on ester bonds;
RHS04189	KDD75186.1/2.48016e-12/hypothetical protein H632_c820p0 [Helicosporidium sp. ATCC 50920]	NA	NA	NA	A0A067SX18/7e-131/A0A067SX18_GALM3 Uncharacterized protein OS=Galerina marginata (strain CBS 339.88) OX=685588 GN=GALMADRAFT_229073 PE=4 SV=1	NA	NA
RHS04190	XP_016457209.1/2.02464e-24/PREDICTED: flavonoid 3&apos;-monooxygenase-like [Nicotiana tabacum]	A8NCK4/1e-78/COX1_COPC7 Cytochrome P450 monooxygenase COX1 OS=Coprinopsis cinerea (strain Okayama-7 / 130 / ATCC MYA-4618 / FGSC 9003) OX=240176 GN=COX1 PE=1 SV=2	nta:107781089/4e-25/flavonoid 3'-monooxygenase-like; K20623 typhasterol/6-deoxotyphasterol 2alpha-hydroxylase	Hs13699818/2e-26/[Q] KOG0156 Cytochrome P450 CYP2 subfamily	A0A067TQI0/3e-144/A0A067TQI0_GALM3 Uncharacterized protein OS=Galerina marginata (strain CBS 339.88) OX=685588 GN=GALMADRAFT_135544 PE=4 SV=1	PR00463/7.0E-11/E-class P450 group I signature	molecular_function:GO:0016705//oxidoreductase activity, acting on paired donors, with incorporation or reduction of molecular oxygen;GO:0020037//heme binding;GO:0005506//iron ion binding;GO:0004497//monooxygenase activity;
RHS04191	NA	NA	NA	NA	A0A0C9XAR9/1e-137/A0A0C9XAR9_9AGAR Unplaced genomic scaffold K443scaffold_242, whole genome shotgun sequence OS=Laccaria amethystina LaAM-08-1 OX=1095629 GN=K443DRAFT_683459 PE=4 SV=1	NA	NA
RHS04192	XP_009351378.1/5.12152e-44/PREDICTED: uncharacterized protein LOC103942908, partial [Pyrus x bretschneideri]	Q8TFD3/5e-96/DOTC_DOTSE Efflux pump dotC OS=Dothistroma septosporum OX=64363 GN=dotC PE=2 SV=2	NA	SPCC1529.01/1e-12/[R] KOG0255 Synaptic vesicle transporter SVOP and related transporters (major facilitator superfamily)	A0A369JJL9/0.0/A0A369JJL9_HYPMA Efflux pump FUS6 OS=Hypsizygus marmoreus OX=39966 GN=FUS6_2 PE=4 SV=1	PR01036/2.2E-8/Tetracycline resistance protein TetB signature	cellular_component:GO:0016021//integral component of membrane;molecular_function:GO:0022857//transmembrane transporter activity;
RHS04193	NA	NA	NA	NA	A0A401GKN6/5e-13/A0A401GKN6_9APHY Uncharacterized protein OS=Sparassis crispa OX=139825 GN=SCP_0411050 PE=4 SV=1	NA	NA
RHS04194	OQS07485.1/1.35616e-27/hypothetical protein THRCLA_00503 [Thraustotheca clavata]	B0DC53/0.0/PFF1_LACBS Vacuolar membrane protease OS=Laccaria bicolor (strain S238N-H82 / ATCC MYA-4686) OX=486041 GN=LACBIDRAFT_294465 PE=3 SV=1	NA	SPCC1919.12c/1e-63/[OR] KOG2194 Aminopeptidases of the M20 family	A0A2H3C159/0.0/A0A2H3C159_9AGAR Peptide hydrolase OS=Armillaria solidipes OX=1076256 GN=ARMSODRAFT_948670 PE=3 SV=1	PF04389/7.5E-29/Peptidase family M28	cellular_component:GO:0016021//integral component of membrane;
RHS04195	NA	NA	NA	NA	A0A067NK14/8e-28/A0A067NK14_PLEOS Uncharacterized protein OS=Pleurotus ostreatus PC15 OX=1137138 GN=PLEOSDRAFT_1089692 PE=4 SV=1	NA	NA
RHS04196	XP_008621411.1/2.09714e-29/hypothetical protein SDRG_16963 [Saprolegnia diclina VS20] &gt;EQC25154.1 hypothetical protein SDRG_16963 [Saprolegnia diclina VS20]	B0DC53/0.0/PFF1_LACBS Vacuolar membrane protease OS=Laccaria bicolor (strain S238N-H82 / ATCC MYA-4686) OX=486041 GN=LACBIDRAFT_294465 PE=3 SV=1	NA	SPCC1919.12c/4e-73/[OR] KOG2194 Aminopeptidases of the M20 family	A0A2H3C159/0.0/A0A2H3C159_9AGAR Peptide hydrolase OS=Armillaria solidipes OX=1076256 GN=ARMSODRAFT_948670 PE=3 SV=1	PF04389/2.1E-33/Peptidase family M28	cellular_component:GO:0016021//integral component of membrane;
RHS04197	KOO29659.1/2.41921e-98/hypothetical protein Ctob_007976 [Chrysochromulina sp. CCMP291]	Q9UM11/3e-100/FZR1_HUMAN Fizzy-related protein homolog OS=Homo sapiens OX=9606 GN=FZR1 PE=1 SV=2	ppp:112281371/5e-93/protein FIZZY-RELATED 3-like; K03364 cell division cycle 20-like protein 1, cofactor of APC complex	Hs7705377/2e-100/[DO] KOG0305 Anaphase promoting complex, Cdc20, Cdh1, and Ama1 subunits	A0A369JF03/0.0/A0A369JF03_HYPMA Fizzy-related OS=Hypsizygus marmoreus OX=39966 GN=Fzr1 PE=4 SV=1	PS50082/8.57/Trp-Asp (WD) repeats profile.	biological_process:GO:1904668//positive regulation of ubiquitin protein ligase activity;molecular_function:GO:0097027//ubiquitin-protein transferase activator activity;GO:0010997//anaphase-promoting complex binding;
RHS04198	NA	NA	NA	NA	A0A0C9WI56/2e-51/A0A0C9WI56_9AGAR Unplaced genomic scaffold K443scaffold_381, whole genome shotgun sequence OS=Laccaria amethystina LaAM-08-1 OX=1095629 GN=K443DRAFT_685307 PE=4 SV=1	NA	NA
RHS04199	NA	NA	NA	NA	A0A067SIE9/8e-12/A0A067SIE9_GALM3 Uncharacterized protein OS=Galerina marginata (strain CBS 339.88) OX=685588 GN=GALMADRAFT_145189 PE=4 SV=1	NA	NA
RHS04200	NA	NA	NA	NA	A0A409VRR7/2e-26/A0A409VRR7_9AGAR Uncharacterized protein OS=Gymnopilus dilepis OX=231916 GN=CVT26_001825 PE=4 SV=1	NA	NA
RHS04201	GAQ80908.1/1.83541e-13/hypothetical protein KFL_000660020 [Klebsormidium nitens]	P87152/3e-24/SPT7_SCHPO Transcriptional activator spt7 OS=Schizosaccharomyces pombe (strain 972 / ATCC 24843) OX=284812 GN=spt7 PE=1 SV=2	dct:110097706/1e-10/uncharacterized protein LOC110097706; K22184 bromodomain-containing protein 9	SPBC25H2.11c/2e-24/[BK] KOG1472 Histone acetyltransferase SAGA/ADA, catalytic subunit PCAF/GCN5 and related proteins	A0A067SSM1/0.0/A0A067SSM1_GALM3 Uncharacterized protein OS=Galerina marginata (strain CBS 339.88) OX=685588 GN=GALMADRAFT_908498 PE=4 SV=1	PF00439/7.2E-22/Bromodomain	molecular_function:GO:0003743//translation initiation factor activity;
RHS04202	XP_016183531.1/4.72387e-50/probable calcium-binding protein CML49 [Arachis ipaensis]	Q8BFY6/8e-53/PEF1_MOUSE Peflin OS=Mus musculus OX=10090 GN=Pef1 PE=1 SV=1	aip:107625418/9e-51/probable calcium-binding protein CML49; K13448 calcium-binding protein CML	Hs7019485/4e-51/[T] KOG0037 Ca2+-binding protein, EF-Hand protein superfamily	A0A067SPZ8/5e-119/A0A067SPZ8_GALM3 Uncharacterized protein OS=Galerina marginata (strain CBS 339.88) OX=685588 GN=GALMADRAFT_255563 PE=4 SV=1	PS50222/15.378/EF-hand calcium-binding domain profile.	biological_process:GO:0006508//proteolysis;cellular_component:GO:0005737//cytoplasm;molecular_function:GO:0004198//calcium-dependent cysteine-type endopeptidase activity;GO:0005509//calcium ion binding;
RHS04203	OSX80488.1/2.40531e-81/hypothetical protein BU14_0051s0008 [Porphyra umbilicalis]	P59668/6e-89/FAD12_MORIS Delta(12) fatty acid desaturase OS=Mortierella isabellina OX=91625 PE=2 SV=1	ccp:CHC_T00008296001/4e-79/delta12 fatty acid desaturase; K10256 omega-6 fatty acid desaturase / acyl-lipid omega-6 desaturase (Delta-12 desaturase) [EC:1.14.19.6 1.14.19.22]	At3g12120/8e-69/[I] TWOG0155 Oleate desaturase/linoleate desaturase	A0A0C3C4D5/0.0/A0A0C3C4D5_HEBCY Uncharacterized protein OS=Hebeloma cylindrosporum h7 OX=686832 GN=M413DRAFT_387346 PE=4 SV=1	PF00487/3.2E-24/Fatty acid desaturase	biological_process:GO:0006629//lipid metabolic process;cellular_component:GO:0016021//integral component of membrane;molecular_function:GO:0045485//omega-6 fatty acid desaturase activity;
RHS04204	NA	NA	NA	NA	NA	NA	NA
RHS04205	XP_005706621.1/2.82747e-42/cytochrome p450 monooxygenase [Galdieria sulphuraria] &gt;EME30101.1 cytochrome p450 monooxygenase [Galdieria sulphuraria]	A0A140JWT9/4e-43/PTMK_PENSI Cytochrome P450 monooxygenase ptmK OS=Penicillium simplicissimum OX=69488 GN=ptmK PE=3 SV=1	rcu:8274991/7e-31/protein LUTEIN DEFICIENT 5, chloroplastic isoform X2; K15747 beta-ring hydroxylase [EC:1.14.-.-]	Hs6005737/4e-32/[QI] KOG0157 Cytochrome P450 CYP4/CYP19/CYP26 subfamilies	A0A067T8I4/0.0/A0A067T8I4_GALM3 Uncharacterized protein OS=Galerina marginata (strain CBS 339.88) OX=685588 GN=GALMADRAFT_249339 PE=4 SV=1	PR00385/2.7E-10/P450 superfamily signature	cellular_component:GO:0016021//integral component of membrane;molecular_function:GO:0016705//oxidoreductase activity, acting on paired donors, with incorporation or reduction of molecular oxygen;GO:0020037//heme binding;GO:0070330//aromatase activity;GO:0005506//iron ion binding;GO:0004497//monooxygenase activity;
RHS04206	NA	NA	NA	NA	A0A369JEU9/1e-41/A0A369JEU9_HYPMA Uncharacterized protein OS=Hypsizygus marmoreus OX=39966 GN=Hypma_012266 PE=4 SV=1	NA	NA
RHS04207	NA	NA	NA	NA	A0A0C9X8B8/2e-78/A0A0C9X8B8_9AGAR Unplaced genomic scaffold K443scaffold_285, whole genome shotgun sequence OS=Laccaria amethystina LaAM-08-1 OX=1095629 GN=K443DRAFT_12550 PE=4 SV=1	NA	NA
RHS04208	XP_009517808.1/3.2347e-149/hypothetical protein PHYSODRAFT_553521 [Phytophthora sojae] &gt;EGZ30533.1 hypothetical protein PHYSODRAFT_553521 [Phytophthora sojae]	P78921/1e-169/TCPQ_SCHPO Probable T-complex protein 1 subunit theta OS=Schizosaccharomyces pombe (strain 972 / ATCC 24843) OX=284812 GN=cct8 PE=2 SV=3	jre:108983584/6e-138/T-complex protein 1 subunit theta; K09500 T-complex protein 1 subunit theta	SPBC337.05c/5e-170/[O] KOG0362 Chaperonin complex component, TCP-1 theta subunit (CCT8)	A0A409VTB5/0.0/A0A409VTB5_PSICY Uncharacterized protein OS=Psilocybe cyanescens OX=93625 GN=CVT25_013378 PE=3 SV=1	PF00118/6.3E-114/TCP-1/cpn60 chaperonin family	biological_process:GO:0006457//protein folding;GO:0006458//'de novo' protein folding;GO:0061077//chaperone-mediated protein folding;cellular_component:GO:0005737//cytoplasm;GO:0005832//chaperonin-containing T-complex;molecular_function:GO:0005524//ATP binding;GO:0051082//unfolded protein binding;GO:0044183//protein binding involved in protein folding;
RHS04209	KOO22606.1/3.6893e-06/ABC transporter family protein [Chrysochromulina sp. CCMP291]	Q12298/2e-19/YD061_YEAST Uncharacterized ABC transporter ATP-binding protein YDR061W OS=Saccharomyces cerevisiae (strain ATCC 204508 / S288c) OX=559292 GN=YDR061W PE=1 SV=1	csl:COCSUDRAFT_28337/8e-06/P-loop containing nucleoside triphosphate hydrolase protein; K12608 CCR4-NOT complex subunit CAF16	YDR061w/7e-20/[R] KOG0927 Predicted transporter (ABC superfamily)	A0A0C9X2M3/2e-139/A0A0C9X2M3_9AGAR Unplaced genomic scaffold K443scaffold_570, whole genome shotgun sequence OS=Laccaria amethystina LaAM-08-1 OX=1095629 GN=K443DRAFT_686475 PE=4 SV=1	PF00005/1.4E-5/ABC transporter	NA
RHS04210	NA	P20084/8e-11/RM33_YEAST 54S ribosomal protein L33, mitochondrial OS=Saccharomyces cerevisiae (strain ATCC 204508 / S288c) OX=559292 GN=MRPL33 PE=1 SV=4	NA	NA	A0A0C9XX83/6e-51/A0A0C9XX83_9AGAR Unplaced genomic scaffold K443scaffold_3, whole genome shotgun sequence OS=Laccaria amethystina LaAM-08-1 OX=1095629 GN=K443DRAFT_82381 PE=4 SV=1	PF00327/2.8E-10/Ribosomal protein L30p/L7e	NA
RHS04211	OSX80488.1/4.66453e-85/hypothetical protein BU14_0051s0008 [Porphyra umbilicalis]	Q9Y8H5/7e-91/FAD12_MORAP Delta(12) fatty acid desaturase OS=Mortierella alpina OX=64518 PE=1 SV=2	ccp:CHC_T00008296001/3e-80/delta12 fatty acid desaturase; K10256 omega-6 fatty acid desaturase / acyl-lipid omega-6 desaturase (Delta-12 desaturase) [EC:1.14.19.6 1.14.19.22]	At3g12120/4e-73/[I] TWOG0155 Oleate desaturase/linoleate desaturase	A0A0C3C4D5/0.0/A0A0C3C4D5_HEBCY Uncharacterized protein OS=Hebeloma cylindrosporum h7 OX=686832 GN=M413DRAFT_387346 PE=4 SV=1	PF00487/3.8E-24/Fatty acid desaturase	biological_process:GO:0006629//lipid metabolic process;cellular_component:GO:0016021//integral component of membrane;molecular_function:GO:0045485//omega-6 fatty acid desaturase activity;
RHS04212	NA	NA	NA	NA	A0A0C9WRD2/4e-89/A0A0C9WRD2_9AGAR Unplaced genomic scaffold K443scaffold_281, whole genome shotgun sequence OS=Laccaria amethystina LaAM-08-1 OX=1095629 GN=K443DRAFT_684130 PE=4 SV=1	NA	NA
RHS04213	NA	NA	NA	NA	B0DCA3/3e-59/B0DCA3_LACBS Smc-domain containing protein OS=Laccaria bicolor (strain S238N-H82 / ATCC MYA-4686) OX=486041 GN=LACBIDRAFT_298116 PE=4 SV=1	NA	NA
RHS04214	NA	NA	NA	NA	A0A0C9XHR5/1e-58/A0A0C9XHR5_9AGAR Unplaced genomic scaffold K443scaffold_78, whole genome shotgun sequence OS=Laccaria amethystina LaAM-08-1 OX=1095629 GN=K443DRAFT_581866 PE=4 SV=1	NA	NA
RHS04215	XP_009351420.1/7.56097e-58/PREDICTED: uncharacterized protein LOC103942945, partial [Pyrus x bretschneideri]	NA	NA	NA	A0A0C9X6J0/0.0/A0A0C9X6J0_9AGAR Unplaced genomic scaffold K443scaffold_412, whole genome shotgun sequence OS=Laccaria amethystina LaAM-08-1 OX=1095629 GN=K443DRAFT_114236 PE=4 SV=1	NA	molecular_function:GO:0008236//serine-type peptidase activity;
RHS04216	NA	NA	NA	NA	A0A409YEG4/5e-72/A0A409YEG4_9AGAR Uncharacterized protein OS=Panaeolus cyanescens OX=181874 GN=CVT24_006219 PE=4 SV=1	NA	NA
RHS04217	XP_009351420.1/2.45968e-70/PREDICTED: uncharacterized protein LOC103942945, partial [Pyrus x bretschneideri]	NA	NA	NA	A0A0C9X6J0/0.0/A0A0C9X6J0_9AGAR Unplaced genomic scaffold K443scaffold_412, whole genome shotgun sequence OS=Laccaria amethystina LaAM-08-1 OX=1095629 GN=K443DRAFT_114236 PE=4 SV=1	NA	molecular_function:GO:0008236//serine-type peptidase activity;
RHS04218	XP_005707112.1/4.52094e-34/mitochondrial carrier (BOU / S-adenosylmethionine carrier) [Galdieria sulphuraria] &gt;EME30592.1 mitochondrial carrier (BOU / S-adenosylmethionine carrier) [Galdieria sulphuraria]	Q54BM3/2e-38/MCFG_DICDI Mitochondrial substrate carrier family protein G OS=Dictyostelium discoideum OX=44689 GN=mcfG PE=2 SV=1	gsl:Gasu_20540/9e-35/mitochondrial carrier (BOU / S-adenosylmethionine carrier); K15109 solute carrier family 25 (mitochondrial carnitine/acylcarnitine transporter), member 20/29	CE28408/5e-33/[C] KOG0758 Mitochondrial carnitine-acylcarnitine carrier protein	A0A0D2NVT8/6e-156/A0A0D2NVT8_9AGAR Uncharacterized protein OS=Hypholoma sublateritium FD-334 SS-4 OX=945553 GN=HYPSUDRAFT_42926 PE=3 SV=1	PS50920/17.429/Solute carrier (Solcar) repeat profile.	biological_process:GO:0006810//transport;GO:0055085//transmembrane transport;GO:0006839//mitochondrial transport;cellular_component:GO:0016021//integral component of membrane;GO:0005739//mitochondrion;GO:0009507//chloroplast;
RHS04219	NA	NA	NA	NA	A0A0C9X7I7/2e-21/A0A0C9X7I7_9AGAR Unplaced genomic scaffold K443scaffold_381, whole genome shotgun sequence OS=Laccaria amethystina LaAM-08-1 OX=1095629 GN=K443DRAFT_685311 PE=4 SV=1	NA	NA
RHS04220	NA	C5DT65/1e-08/CMC4_ZYGRC Cx9C motif-containing protein 4, mitochondrial OS=Zygosaccharomyces rouxii (strain ATCC 2623 / CBS 732 / NBRC 1130 / NCYC 568 / NRRL Y-229) OX=559307 GN=CMC4 PE=3 SV=1	NA	NA	S8EGW6/1e-23/S8EGW6_FOMPI Uncharacterized protein OS=Fomitopsis pinicola (strain FP-58527) OX=743788 GN=FOMPIDRAFT_1029304 PE=4 SV=1	PF08991/1.1E-16/Mature-T-Cell Proliferation I type	NA
RHS04221	NA	NA	NA	NA	NA	NA	NA
RHS04222	KFK31695.1/7.81591e-51/hypothetical protein AALP_AA6G147300, partial [Arabis alpina]	A8N4R7/1e-95/MTND1_COPC7 1,2-dihydroxy-3-keto-5-methylthiopentene dioxygenase 1 OS=Coprinopsis cinerea (strain Okayama-7 / 130 / ATCC MYA-4618 / FGSC 9003) OX=240176 GN=ADI1-1 PE=3 SV=1	psom:113338077/2e-54/1,2-dihydroxy-3-keto-5-methylthiopentene dioxygenase 1-like; K08967 1,2-dihydroxy-3-keto-5-methylthiopentene dioxygenase [EC:1.13.11.53 1.13.11.54]	At5g43850/3e-52/[S] KOG2107 Uncharacterized conserved protein, contains double-stranded beta-helix domain	B0DC57/2e-111/B0DC57_LACBS 1,2-dihydroxy-3-keto-5-methylthiopentene dioxygenase OS=Laccaria bicolor (strain S238N-H82 / ATCC MYA-4686) OX=486041 GN=ADI1 PE=3 SV=1	PF03079/3.6E-45/ARD/ARD' family	biological_process:GO:0019509//L-methionine salvage from methylthioadenosine;cellular_component:GO:0005634//nucleus;GO:0005737//cytoplasm;molecular_function:GO:0010309//acireductone dioxygenase [iron(II)-requiring] activity;GO:0005506//iron ion binding;
RHS04223	NA	NA	NA	NA	A8NLK7/2e-22/A8NLK7_COPC7 Uncharacterized protein OS=Coprinopsis cinerea (strain Okayama-7 / 130 / ATCC MYA-4618 / FGSC 9003) OX=240176 GN=CC1G_05849 PE=4 SV=2	NA	NA
RHS04224	NA	NA	NA	NA	NA	NA	NA
RHS04225	XP_008604020.1/1.65302e-80/hypothetical protein SDRG_00326 [Saprolegnia diclina VS20] &gt;EQC42597.1 hypothetical protein SDRG_00326 [Saprolegnia diclina VS20]	A2QK68/3e-85/KTND_ASPNC FAD-binding monooxygenase ktnD OS=Aspergillus niger (strain CBS 513.88 / FGSC A1513) OX=425011 GN=ktnD PE=3 SV=1	thj:104809046/3e-15/probable flavin-containing monooxygenase 1; K00485 dimethylaniline monooxygenase (N-oxide forming) [EC:1.14.13.8]	Hs4503755/7e-13/[Q] KOG1399 Flavin-containing monooxygenase	A0A0C9XHS1/2e-177/A0A0C9XHS1_9AGAR Unplaced genomic scaffold K443scaffold_211, whole genome shotgun sequence OS=Laccaria amethystina LaAM-08-1 OX=1095629 GN=K443DRAFT_134351 PE=3 SV=1	PS51257/5.0/Prokaryotic membrane lipoprotein lipid attachment site profile.	molecular_function:GO:0050661//NADP binding;GO:0016787//hydrolase activity;GO:0004499//N,N-dimethylaniline monooxygenase activity;GO:0050660//flavin adenine dinucleotide binding;
RHS04226	NA	NA	NA	NA	A0A0C3EV68/4e-104/A0A0C3EV68_9AGAM Uncharacterized protein OS=Piloderma croceum F 1598 OX=765440 GN=PILCRDRAFT_830179 PE=4 SV=1	PS50011/10.337/Protein kinase domain profile.	NA
RHS00178	NA	NA	NA	NA	NA	NA	NA
RHS00179	XP_005649489.1/1.05527e-18/WD40 repeat-like protein [Coccomyxa subellipsoidea C-169] &gt;EIE24945.1 WD40 repeat-like protein [Coccomyxa subellipsoidea C-169]	Q09855/4e-37/POF11_SCHPO F-box/WD repeat-containing protein pof11 OS=Schizosaccharomyces pombe (strain 972 / ATCC 24843) OX=284812 GN=pof11 PE=1 SV=2	csl:COCSUDRAFT_23114/2e-19/WD40 repeat-like protein; K10260 F-box and WD-40 domain protein 7	SPAC29E6.01/2e-37/[S] KOG0281 Beta-TrCP (transducin repeats containing)/Slimb proteins	A0A067SUC1/0.0/A0A067SUC1_GALM3 Uncharacterized protein OS=Galerina marginata (strain CBS 339.88) OX=685588 GN=GALMADRAFT_142128 PE=4 SV=1	PS50082/12.146/Trp-Asp (WD) repeats profile.	molecular_function:GO:0004842//ubiquitin-protein transferase activity;
RHS00180	NA	NA	NA	NA	A0A0D2MSK6/2e-31/A0A0D2MSK6_9AGAR Uncharacterized protein OS=Hypholoma sublateritium FD-334 SS-4 OX=945553 GN=HYPSUDRAFT_978606 PE=4 SV=1	NA	NA
RHS00181	NA	NA	NA	NA	A0A2A9NVJ2/3e-21/A0A2A9NVJ2_9AGAR Uncharacterized protein OS=Amanita thiersii Skay4041 OX=703135 GN=AMATHDRAFT_39973 PE=4 SV=1	NA	NA
RHS00182	XP_004497836.1/3.57649e-17/PREDICTED: putative SWI/SNF-related matrix-associated actin-dependent regulator of chromatin subfamily A member 3-like 3 [Cicer arietinum]	P36607/1e-17/RAD5_SCHPO DNA repair protein rad8 OS=Schizosaccharomyces pombe (strain 972 / ATCC 24843) OX=284812 GN=rad8 PE=1 SV=1	crb:17875223/2e-17/DNA repair protein RAD5B isoform X1; K15505 DNA repair protein RAD5 [EC:3.6.4.-]	SPAC20G8.08c/2e-17/[B] KOG0389 SNF2 family DNA-dependent ATPase	A0A0C9YD47/0.0/A0A0C9YD47_9AGAR Unplaced genomic scaffold K443scaffold_20, whole genome shotgun sequence OS=Laccaria amethystina LaAM-08-1 OX=1095629 GN=K443DRAFT_674669 PE=4 SV=1	PF00176/8.0E-6/SNF2 family N-terminal domain	molecular_function:GO:0005524//ATP binding;GO:0016818//hydrolase activity, acting on acid anhydrides, in phosphorus-containing anhydrides;GO:0008270//zinc ion binding;GO:0004386//helicase activity;GO:0003676//nucleic acid binding;
RHS07726	XP_005829432.1/3.17953e-45/hypothetical protein GUITHDRAFT_164091 [Guillardia theta CCMP2712] &gt;EKX42452.1 hypothetical protein GUITHDRAFT_164091 [Guillardia theta CCMP2712]	P56859/2e-82/MET16_EMENI Phosphoadenosine phosphosulfate reductase OS=Emericella nidulans (strain FGSC A4 / ATCC 38163 / CBS 112.46 / NRRL 194 / M139) OX=227321 GN=sA PE=3 SV=3	csl:COCSUDRAFT_46267/1e-31/adenine nucleotide alpha hydrolases-like protein; K00390 phosphoadenosine phosphosulfate reductase [EC:1.8.4.8 1.8.4.10]	YPR167c/2e-78/[E] KOG0189 Phosphoadenosine phosphosulfate reductase	A0A401GCB7/3e-177/A0A401GCB7_9APHY Uncharacterized protein OS=Sparassis crispa OX=139825 GN=SCP_0210200 PE=4 SV=1	TIGR00434/2.7E-68/cysH: phosophoadenylyl-sulfate reductase	biological_process:GO:0019379//sulfate assimilation, phosphoadenylyl sulfate reduction by phosphoadenylyl-sulfate reductase (thioredoxin);GO:0045454//cell redox homeostasis;cellular_component:GO:0005623//cell;GO:0005737//cytoplasm;molecular_function:GO:0004604//phosphoadenylyl-sulfate reductase (thioredoxin) activity;
RHS07727	NA	Q9P3B2/2e-11/RCF2_SCHPO Respiratory supercomplex factor 2 homolog C1565.01 OS=Schizosaccharomyces pombe (strain 972 / ATCC 24843) OX=284812 GN=rcf2 PE=3 SV=1	NA	NA	A0A0C9X7J7/1e-82/A0A0C9X7J7_9AGAR Unplaced genomic scaffold K443scaffold_301, whole genome shotgun sequence OS=Laccaria amethystina LaAM-08-1 OX=1095629 GN=K443DRAFT_12767 PE=4 SV=1	NA	NA
RHS07728	NA	NA	NA	NA	NA	NA	NA
RHS07729	NA	NA	NA	NA	A0A0D2NZS1/8e-65/A0A0D2NZS1_9AGAR Uncharacterized protein OS=Hypholoma sublateritium FD-334 SS-4 OX=945553 GN=HYPSUDRAFT_80978 PE=4 SV=1	NA	NA
RHS07730	NA	NA	NA	NA	A0A409WUT5/2e-26/A0A409WUT5_PSICY Uncharacterized protein OS=Psilocybe cyanescens OX=93625 GN=CVT25_008435 PE=4 SV=1	NA	NA
RHS07731	NA	NA	NA	NA	A0A0C3CCK3/2e-158/A0A0C3CCK3_HEBCY Uncharacterized protein OS=Hebeloma cylindrosporum h7 OX=686832 GN=M413DRAFT_441603 PE=4 SV=1	NA	NA
RHS07401	CBJ30107.1/2.5313e-90/conserved unknown protein [Ectocarpus siliculosus]	Q6FTK4/3e-99/RL11_CANGA 60S ribosomal protein L11 OS=Candida glabrata (strain ATCC 2001 / CBS 138 / JCM 3761 / NBRC 0622 / NRRL Y-65) OX=284593 GN=RPL11 PE=3 SV=1	soe:110785605/5e-89/60S ribosomal protein L11-1-like isoform X1; K02868 large subunit ribosomal protein L11e	SPBC17G9.10/1e-95/[J] KOG0397 60S ribosomal protein L11	A0A1Q3EM93/3e-119/A0A1Q3EM93_LENED 60S ribosomal protein L11 OS=Lentinula edodes OX=5353 GN=LENED_010367 PE=3 SV=1	PF00673/5.8E-21/ribosomal L5P family C-terminus	biological_process:GO:0006412//translation;cellular_component:GO:0005840//ribosome;molecular_function:GO:0003735//structural constituent of ribosome;
RHS07402	NA	Q58DK8/1e-06/TRI38_BOVIN E3 ubiquitin-protein ligase TRIM38 OS=Bos taurus OX=9913 GN=TRIM38 PE=2 SV=1	NA	NA	A0A067TCG0/2e-63/A0A067TCG0_GALM3 Uncharacterized protein OS=Galerina marginata (strain CBS 339.88) OX=685588 GN=GALMADRAFT_1111130 PE=4 SV=1	PS50089/9.332/Zinc finger RING-type profile.	NA
RHS07403	XP_009351316.1/9.46996e-37/PREDICTED: cytochrome P450 monooxygenase pyr3-like, partial [Pyrus x bretschneideri]	S0E3D0/3e-69/GA2_GIBF5 Ent-kaurene oxidase P450-4 OS=Gibberella fujikuroi (strain CBS 195.34 / IMI 58289 / NRRL A-6831) OX=1279085 GN=P450-4 PE=1 SV=1	csv:101221468/2e-19/cytochrome P450 78A5; K20619 cytochrome P450 family 78 subfamily A	Hs13904858/2e-19/[QI] KOG0157 Cytochrome P450 CYP4/CYP19/CYP26 subfamilies	A0A165NZQ5/1e-137/A0A165NZQ5_9AGAM Cytochrome P450 OS=Neolentinus lepideus HHB14362 ss-1 OX=1314782 GN=NEOLEDRAFT_1140924 PE=3 SV=1	PF00067/2.2E-57/Cytochrome P450	molecular_function:GO:0016705//oxidoreductase activity, acting on paired donors, with incorporation or reduction of molecular oxygen;GO:0020037//heme binding;GO:0005506//iron ion binding;GO:0004497//monooxygenase activity;
RHS07404	XP_001753861.1/2.09522e-44/predicted protein [Physcomitrella patens] &gt;EDQ81183.1 predicted protein, partial [Physcomitrella patens]	P55201/3e-117/BRPF1_HUMAN Peregrin OS=Homo sapiens OX=9606 GN=BRPF1 PE=1 SV=2	ota:OT_ostta08g01950/2e-38/Zinc finger, PHD-finger; K11348 bromodomain and PHD finger-containing protein 1	Hs15295343/1e-117/[R] KOG0955 PHD finger protein BR140/LIN-49	A0A0C9X0R1/0.0/A0A0C9X0R1_9AGAR Unplaced genomic scaffold K443scaffold_23, whole genome shotgun sequence OS=Laccaria amethystina LaAM-08-1 OX=1095629 GN=K443DRAFT_674953 PE=4 SV=1	PS51805/30.33/Extended PHD (ePHD) domain profile.	cellular_component:GO:0005634//nucleus;molecular_function:GO:0046872//metal ion binding;GO:0018024//histone-lysine N-methyltransferase activity;
RHS07405	XP_005643724.1/9.81805e-21/cytochrome P450 [Coccomyxa subellipsoidea C-169] &gt;EIE19180.1 cytochrome P450 [Coccomyxa subellipsoidea C-169]	Q4WAW5/1e-51/FTMC_ASPFU Tryprostatin B 6-hydroxylase OS=Neosartorya fumigata (strain ATCC MYA-4609 / Af293 / CBS 101355 / FGSC A1100) OX=330879 GN=ftmP450-1 PE=3 SV=2	csl:COCSUDRAFT_49034/2e-21/cytochrome P450; K01832 thromboxane-A synthase [EC:5.3.99.5]	At3g61040/8e-21/[Q] KOG0156 Cytochrome P450 CYP2 subfamily	A0A369K297/6e-176/A0A369K297_HYPMA Uncharacterized protein OS=Hypsizygus marmoreus OX=39966 GN=Hypma_003306 PE=4 SV=1	PF00067/3.9E-39/Cytochrome P450	biological_process:GO:0044550//secondary metabolite biosynthetic process;cellular_component:GO:0016020//membrane;GO:0016021//integral component of membrane;molecular_function:GO:0016709//oxidoreductase activity, acting on paired donors, with incorporation or reduction of molecular oxygen, NAD(P)H as one donor, and incorporation of one atom of oxygen;GO:0020037//heme binding;GO:0005506//iron ion b…
RHS07406	NA	NA	NA	NA	A0A0C3EV68/1e-62/A0A0C3EV68_9AGAM Uncharacterized protein OS=Piloderma croceum F 1598 OX=765440 GN=PILCRDRAFT_830179 PE=4 SV=1	PS50011/9.136/Protein kinase domain profile.	NA
RHS07407	XP_008375064.1/6.85483e-49/PREDICTED: DNA-directed RNA polymerase II subunit RPB7 [Malus domestica] &gt;XP_009355927.1 PREDICTED: DNA-directed RNA polymerase II subunit RPB7 [Pyrus x bretschneideri]	O14459/7e-65/RPB7_SCHPO DNA-directed RNA polymerase II subunit rpb7 OS=Schizosaccharomyces pombe (strain 972 / ATCC 24843) OX=284812 GN=rpb7 PE=1 SV=1	lja:Lj2g3v1984950.1/2e-51/Lj2g3v1984950.1; -; K03015 DNA-directed RNA polymerase II subunit RPB7	SPACUNK4.06c/3e-65/[K] KOG3298 DNA-directed RNA polymerase subunit E'	A0A409Y4U1/1e-100/A0A409Y4U1_9AGAR Uncharacterized protein OS=Gymnopilus dilepis OX=231916 GN=CVT26_003064 PE=4 SV=1	PF03876/3.4E-9/SHS2 domain found in N terminus of Rpb7p/Rpc25p/MJ0397	biological_process:GO:0006351//transcription, DNA-templated;cellular_component:GO:0005665//DNA-directed RNA polymerase II, core complex;molecular_function:GO:0003899//DNA-directed 5'-3' RNA polymerase activity;GO:0003676//nucleic acid binding;
RHS07408	ETK85579.1/1.6009e-36/hypothetical protein L915_09657 [Phytophthora parasitica] &gt;ETL39008.1 hypothetical protein L916_09560 [Phytophthora parasitica] &gt;ETP15443.1 hypothetical protein F441_09804 [Phytophthora parasitica CJ01A1]	Q0CJ62/2e-42/ATA_ASPTN 6-methylsalicylic acid decarboxylase atA OS=Aspergillus terreus (strain NIH 2624 / FGSC A1156) OX=341663 GN=atA PE=1 SV=1	pxb:103939772/4e-26/uncharacterized protein LOC103939772; K00480 salicylate hydroxylase [EC:1.14.13.1]	At2g35660/7e-11/[CR] KOG2614 Kynurenine 3-monooxygenase and related flavoprotein monooxygenases	A0A0C9YBZ7/0.0/A0A0C9YBZ7_9AGAR Unplaced genomic scaffold K443scaffold_23, whole genome shotgun sequence OS=Laccaria amethystina LaAM-08-1 OX=1095629 GN=K443DRAFT_334762 PE=4 SV=1	PF01494/3.6E-10/FAD binding domain	molecular_function:GO:0071949//FAD binding;
RHS07409	NA	NA	NA	NA	A0A0L6WV74/2e-33/A0A0L6WV74_9AGAR Uncharacterized protein OS=Termitomyces sp. J132 OX=1306850 GN=J132_09610 PE=4 SV=1	NA	NA
RHS07410	OQS05502.1/2.92825e-83/aminotransferase [Thraustotheca clavata]	Q4WD47/2e-51/FMPE_ASPFU Nonribosomal peptide synthetase fmpE OS=Neosartorya fumigata (strain ATCC MYA-4609 / Af293 / CBS 101355 / FGSC A1100) OX=330879 GN=fmpE PE=2 SV=1	jcu:105637200/9e-31/cysteine desulfurase 1, chloroplastic isoform X1; K11717 cysteine desulfurase / selenocysteine lyase [EC:2.8.1.7 4.4.1.16]	At1g08490/1e-21/[E] KOG1549 Cysteine desulfurase NFS1	A0A067TCW5/0.0/A0A067TCW5_GALM3 Uncharacterized protein OS=Galerina marginata (strain CBS 339.88) OX=685588 GN=GALMADRAFT_1116937 PE=4 SV=1	PF00266/2.9E-49/Aminotransferase class-V	molecular_function:GO:0003824//catalytic activity;
RHS07411	NA	NA	NA	NA	NA	NA	NA
RHS07412	NA	NA	NA	NA	A0A1C7LQF4/5e-10/A0A1C7LQF4_GRIFR Uncharacterized protein OS=Grifola frondosa OX=5627 GN=A0H81_13211 PE=4 SV=1	NA	NA
RHS07413	XP_005848298.1/4.32091e-48/hypothetical protein CHLNCDRAFT_56126 [Chlorella variabilis] &gt;EFN56196.1 hypothetical protein CHLNCDRAFT_56126 [Chlorella variabilis]	O35331/9e-46/PDXK_RAT Pyridoxal kinase OS=Rattus norvegicus OX=10116 GN=Pdxk PE=1 SV=1	csl:COCSUDRAFT_18254/1e-46/pyridoxal kinase; K00868 pyridoxine kinase [EC:2.7.1.35]	SPAC6F6.11c/5e-54/[H] KOG2599 Pyridoxal/pyridoxine/pyridoxamine kinase	A0A0D2PIE6/5e-173/A0A0D2PIE6_9AGAR Uncharacterized protein OS=Hypholoma sublateritium FD-334 SS-4 OX=945553 GN=HYPSUDRAFT_129751 PE=4 SV=1	PF08543/1.6E-10/Phosphomethylpyrimidine kinase	biological_process:GO:0009443//pyridoxal 5'-phosphate salvage;molecular_function:GO:0008478//pyridoxal kinase activity;
RHS07414	XP_005772488.1/0/actin-related protein 2 [Emiliania huxleyi CCMP1516] &gt;EOD20059.1 actin-related protein 2 [Emiliania huxleyi CCMP1516]	P61161/0.0/ARP2_MOUSE Actin-related protein 2 OS=Mus musculus OX=10090 GN=Actr2 PE=1 SV=1	csat:104710516/4e-180/actin-related protein 2-like; K17260 actin-related protein 2	Hs5031571/0.0/[Z] KOG0677 Actin-related protein Arp2/3 complex, subunit Arp2	K5ULZ0/0.0/K5ULZ0_PHACS Actin-related protein 2 OS=Phanerochaete carnosa (strain HHB-10118-sp) OX=650164 GN=PHACADRAFT_130167 PE=3 SV=1	PR00190/1.0E-31/Actin signature	biological_process:GO:0034314//Arp2/3 complex-mediated actin nucleation;cellular_component:GO:0005885//Arp2/3 protein complex;molecular_function:GO:0005524//ATP binding;
RHS07415	NA	NA	NA	NA	A0A0C3CPK7/1e-13/A0A0C3CPK7_HEBCY Uncharacterized protein OS=Hebeloma cylindrosporum h7 OX=686832 GN=M413DRAFT_23836 PE=4 SV=1	NA	NA
RHS07416	NA	NA	NA	NA	A0A409W9D7/2e-86/A0A409W9D7_9AGAR Uncharacterized protein OS=Panaeolus cyanescens OX=181874 GN=CVT24_010066 PE=4 SV=1	NA	NA
RHS07417	NA	NA	NA	NA	NA	NA	NA
RHS07418	NA	NA	NA	NA	A0A369J8R4/5e-59/A0A369J8R4_HYPMA Uncharacterized protein OS=Hypsizygus marmoreus OX=39966 GN=Hypma_000250 PE=4 SV=1	NA	NA
RHS07419	NA	NA	NA	NA	A0A409X3T0/7e-13/A0A409X3T0_PSICY Uncharacterized protein OS=Psilocybe cyanescens OX=93625 GN=CVT25_006400 PE=4 SV=1	NA	NA
RHS07420	NA	NA	NA	NA	A0A067TCK1/3e-100/A0A067TCK1_GALM3 Uncharacterized protein OS=Galerina marginata (strain CBS 339.88) OX=685588 GN=GALMADRAFT_135966 PE=4 SV=1	PF13279/2.5E-17/Thioesterase-like superfamily	NA
RHS07421	AGF92151.1/3.01574e-61/diacylglycerol O-acyltransferase [Thraustochytrium aureum]	Q96UY1/3e-93/DGT2B_UMBRA Diacylglycerol O-acyltransferase 2B OS=Umbelopsis ramanniana OX=41833 GN=DGAT2B PE=1 SV=1	ota:OT_ostta13g01070/3e-49/Diacylglycerol acyltransferase; K22848 diacylglycerol O-acyltransferase 2, plant [EC:2.3.1.20]	CE14392/3e-59/[I] KOG0831 Acyl-CoA:diacylglycerol acyltransferase (DGAT)	V2WTH2/3e-168/V2WTH2_MONRO Diacylglycerol o-acyltransferase OS=Moniliophthora roreri (strain MCA 2997) OX=1381753 GN=Moror_7813 PE=4 SV=1	PF03982/1.3E-69/Diacylglycerol acyltransferase	cellular_component:GO:0016021//integral component of membrane;molecular_function:GO:0016747//transferase activity, transferring acyl groups other than amino-acyl groups;
RHS07422	OWM65429.1/0/hypothetical protein CDL15_Pgr009019 [Punica granatum]	P54774/0.0/CDC48_SOYBN Cell division cycle protein 48 homolog OS=Glycine max OX=3847 GN=CDC48 PE=2 SV=1	sita:101783353/0.0/cell division cycle protein 48 homolog; K13525 transitional endoplasmic reticulum ATPase	At5g03340/0.0/[O] KOG0730 AAA+-type ATPase	V2WTA6/0.0/V2WTA6_MONRO Valosin-containing protein OS=Moniliophthora roreri (strain MCA 2997) OX=1381753 GN=Moror_7827 PE=3 SV=1	PF00004/3.0E-46/ATPase family associated with various cellular activities (AAA)	molecular_function:GO:0016787//hydrolase activity;GO:0005524//ATP binding;
RHS07423	XP_004253357.1/1.80168e-48/PREDICTED: LOW QUALITY PROTEIN: uncharacterized transporter C417.10-like [Solanum lycopersicum]	Q9P6J0/2e-94/YHDC_SCHPO Uncharacterized transporter C1683.12 OS=Schizosaccharomyces pombe (strain 972 / ATCC 24843) OX=284812 GN=SPBC1683.12 PE=3 SV=1	csv:101204221/2e-38/tubulin-folding cofactor B; K17262 tubulin-specific chaperone B	SPBC1683.12/8e-95/[G] KOG2533 Permease of the major facilitator superfamily	A0A067SIE6/0.0/A0A067SIE6_GALM3 Uncharacterized protein OS=Galerina marginata (strain CBS 339.88) OX=685588 GN=GALMADRAFT_273465 PE=4 SV=1	PS50850/17.418/Major facilitator superfamily (MFS) profile.	biological_process:GO:0055085//transmembrane transport;cellular_component:GO:0016021//integral component of membrane;
RHS07424	XP_005648989.1/1.47156e-19/DnaJ-domain-containing protein [Coccomyxa subellipsoidea C-169] &gt;EIE24445.1 DnaJ-domain-containing protein [Coccomyxa subellipsoidea C-169]	O13704/2e-22/YEU5_SCHPO Thioredoxin domain-containing protein C13F5.05, mitochondrial OS=Schizosaccharomyces pombe (strain 972 / ATCC 24843) OX=284812 GN=SPAC13F5.05 PE=4 SV=2	mtr:MTR_3g088220/4e-16/protein disulfide isomerase; K09580 protein disulfide-isomerase A1 [EC:5.3.4.1]	SPAC13F5.05/9e-23/[O] KOG0191 Thioredoxin/protein disulfide isomerase	A0A067NQN6/2e-173/A0A067NQN6_PLEOS Uncharacterized protein OS=Pleurotus ostreatus PC15 OX=1137138 GN=PLEOSDRAFT_1089747 PE=4 SV=1	PF00085/2.2E-17/Thioredoxin	biological_process:GO:0045454//cell redox homeostasis;cellular_component:GO:0005783//endoplasmic reticulum;GO:0005623//cell;molecular_function:GO:0003756//protein disulfide isomerase activity;
RHS07425	NA	NA	NA	NA	A0A137QG65/2e-70/A0A137QG65_9AGAR Uncharacterized protein OS=Leucoagaricus sp. SymC.cos OX=1714833 GN=AN958_10394 PE=4 SV=1	PF10342/1.4E-6/Ser-Thr-rich glycosyl-phosphatidyl-inositol-anchored membrane family	NA
RHS07426	NA	NA	NA	NA	A0A369J9C2/7e-46/A0A369J9C2_HYPMA Uncharacterized protein OS=Hypsizygus marmoreus OX=39966 GN=Hypma_000313 PE=4 SV=1	PF08615/4.9E-16/Ribonuclease H2 non-catalytic subunit (Ylr154p-like)	NA
RHS07427	NA	NA	NA	NA	A0A0C9WWK8/4e-74/A0A0C9WWK8_9AGAR Unplaced genomic scaffold K443scaffold_39, whole genome shotgun sequence OS=Laccaria amethystina LaAM-08-1 OX=1095629 GN=K443DRAFT_443534 PE=4 SV=1	PF00638/6.4E-5/RanBP1 domain	NA
RHS07428	XP_010044123.1/6.94364e-88/PREDICTED: LOW QUALITY PROTEIN: amino-acid permease BAT1 homolog [Eucalyptus grandis]	O60113/9e-91/YG64_SCHPO Uncharacterized amino-acid permease C15C4.04c OS=Schizosaccharomyces pombe (strain 972 / ATCC 24843) OX=284812 GN=SPBC15C4.04c PE=3 SV=1	NA	SPBC15C4.04c/4e-91/[E] KOG1289 Amino acid transporters	A0A2A9NIY7/0.0/A0A2A9NIY7_9AGAR Uncharacterized protein OS=Amanita thiersii Skay4041 OX=703135 GN=AMATHDRAFT_3469 PE=4 SV=1	PF13520/7.4E-53/Amino acid permease	cellular_component:GO:0016021//integral component of membrane;molecular_function:GO:0015171//amino acid transmembrane transporter activity;
RHS07429	NA	NA	NA	NA	W4JUR1/2e-11/W4JUR1_9AGAM Uncharacterized protein OS=Heterobasidion irregulare TC 32-1 OX=747525 GN=HETIRDRAFT_422186 PE=4 SV=1	NA	NA
RHS07430	NA	NA	NA	NA	A0A0C3C5Q1/4e-57/A0A0C3C5Q1_HEBCY Uncharacterized protein OS=Hebeloma cylindrosporum h7 OX=686832 GN=M413DRAFT_447062 PE=4 SV=1	PF12937/3.6E-8/F-box-like	NA
RHS07431	NA	O13772/2e-07/HUA1_SCHPO Proline/serine-rich protein C17A5.10 OS=Schizosaccharomyces pombe (strain 972 / ATCC 24843) OX=284812 GN=SPAC17A5.10 PE=2 SV=1	NA	NA	A0A137QSW5/3e-68/A0A137QSW5_9AGAR Proline-rich protein HUA1 (Fragment) OS=Leucoagaricus sp. SymC.cos OX=1714833 GN=AN958_04384 PE=4 SV=1	NA	NA
RHS07432	NA	NA	NA	NA	A0A409VNS4/2e-176/A0A409VNS4_PSICY Uncharacterized protein OS=Psilocybe cyanescens OX=93625 GN=CVT25_010305 PE=4 SV=1	NA	NA
RHS07433	NA	NA	NA	NA	A0A409VCW9/2e-67/A0A409VCW9_9AGAR Uncharacterized protein OS=Panaeolus cyanescens OX=181874 GN=CVT24_008595 PE=4 SV=1	NA	NA
RHS07434	XP_001758883.1/1.8012e-32/predicted protein [Physcomitrella patens] &gt;EDQ76389.1 predicted protein [Physcomitrella patens]	Q9S9T7/1e-31/VP282_ARATH Vacuolar protein sorting-associated protein 28 homolog 2 OS=Arabidopsis thaliana OX=3702 GN=VPS28-2 PE=1 SV=2	ppp:112290972/3e-33/vacuolar protein sorting-associated protein 28 homolog 1-like; K12184 ESCRT-I complex subunit VPS28	At4g05000/5e-32/[U] KOG3284 Vacuolar sorting protein VPS28	A0A0C3EZA5/2e-102/A0A0C3EZA5_9AGAM Vacuolar protein sorting-associated protein 28 OS=Piloderma croceum F 1598 OX=765440 GN=PILCRDRAFT_829431 PE=3 SV=1	PS51310/38.54/VPS28 C-terminal domain profile.	biological_process:GO:0043328//protein transport to vacuole involved in ubiquitin-dependent protein catabolic process via the multivesicular body sorting pathway;cellular_component:GO:0000813//ESCRT I complex;molecular_function:GO:0032403//protein complex binding;
RHS07435	OWZ00919.1/1.71602e-51/Endoplasmic reticulum metallopeptidase [Phytophthora megakarya]	Q6UPR8/1e-57/ERMP1_RAT Endoplasmic reticulum metallopeptidase 1 OS=Rattus norvegicus OX=10116 GN=Ermp1 PE=1 SV=1	NA	SPCC1259.02c/2e-160/[OR] KOG2194 Aminopeptidases of the M20 family	A0A409WMK4/0.0/A0A409WMK4_PSICY Peptide hydrolase OS=Psilocybe cyanescens OX=93625 GN=CVT25_002977 PE=3 SV=1	PF04389/1.3E-28/Peptidase family M28	cellular_component:GO:0016021//integral component of membrane;
RHS07436	NA	NA	NA	NA	NA	NA	NA
RHS07437	XP_009351316.1/2.01211e-32/PREDICTED: cytochrome P450 monooxygenase pyr3-like, partial [Pyrus x bretschneideri]	S0E3D0/5e-71/GA2_GIBF5 Ent-kaurene oxidase P450-4 OS=Gibberella fujikuroi (strain CBS 195.34 / IMI 58289 / NRRL A-6831) OX=1279085 GN=P450-4 PE=1 SV=1	nsy:104221496/1e-25/cytochrome P450 CYP736A12-like; K20562 biphenyl-4-hydroxylase	At2g45580/3e-23/[Q] KOG0156 Cytochrome P450 CYP2 subfamily	F8PCR1/2e-125/F8PCR1_SERL9 Uncharacterized protein OS=Serpula lacrymans var. lacrymans (strain S7.9) OX=578457 GN=SERLADRAFT_480139 PE=3 SV=1	PR00385/3.7E-7/P450 superfamily signature	cellular_component:GO:0016021//integral component of membrane;molecular_function:GO:0016705//oxidoreductase activity, acting on paired donors, with incorporation or reduction of molecular oxygen;GO:0020037//heme binding;GO:0005506//iron ion binding;GO:0004497//monooxygenase activity;
RHS07438	ARJ57513.1/1.95669e-30/beta-1-6-glucanase-like protein [Lolium perenne] &gt;ARJ57514.1 beta-1-6-glucanase-like protein [Lolium perenne] &gt;ARJ57515.1 beta-1-6-glucanase-like protein [Lolium perenne]	Q5B6Q3/2e-35/EXGB_EMENI Glucan endo-1,6-beta-glucosidase B OS=Emericella nidulans (strain FGSC A4 / ATCC 38163 / CBS 112.46 / NRRL 194 / M139) OX=227321 GN=exgB PE=2 SV=1	NA	NA	A0A137QLB1/0.0/A0A137QLB1_9AGAR Glucan endo-1,6-beta-glucosidase B OS=Leucoagaricus sp. SymC.cos OX=1714833 GN=AN958_07819 PE=3 SV=1	NA	biological_process:GO:0005975//carbohydrate metabolic process;molecular_function:GO:0004553//hydrolase activity, hydrolyzing O-glycosyl compounds;
RHS07439	XP_002502188.1/5.54488e-23/predicted protein [Micromonas commoda] &gt;ACO63446.1 predicted protein [Micromonas commoda]	O59952/1e-16/LIP_THELA Lipase OS=Thermomyces lanuginosus OX=5541 GN=LIP PE=1 SV=1	han:110918029/6e-07/phospholipase A(1) DAD1, chloroplastic-like; K16818 phospholipase A1 [EC:3.1.1.32]	At5g18630/9e-13/[I] KOG4569 Predicted lipase	A0A2A9NR83/7e-165/A0A2A9NR83_9AGAR Uncharacterized protein OS=Amanita thiersii Skay4041 OX=703135 GN=AMATHDRAFT_193502 PE=4 SV=1	PF01764/2.2E-22/Lipase (class 3)	biological_process:GO:0006629//lipid metabolic process;molecular_function:GO:0016787//hydrolase activity;
RHS07440	XP_022157572.1/1.21956e-27/heat stress transcription factor C-1-like [Momordica charantia]	P22813/2e-25/HSF_DROME Heat shock factor protein OS=Drosophila melanogaster OX=7227 GN=Hsf PE=1 SV=1	mcha:111024233/2e-28/heat stress transcription factor C-1-like; K09419 heat shock transcription factor, other eukaryote	7302669/1e-25/[K] KOG0627 Heat shock transcription factor	A0A369JI68/2e-175/A0A369JI68_HYPMA Heat shock factor protein OS=Hypsizygus marmoreus OX=39966 GN=Hsf PE=3 SV=1	PF00447/6.4E-32/HSF-type DNA-binding	NA
RHS07441	NA	Q7SE71/2e-51/ATPF_NEUCR ATP synthase subunit 4, mitochondrial OS=Neurospora crassa (strain ATCC 24698 / 74-OR23-1A / CBS 708.71 / DSM 1257 / FGSC 987) OX=367110 GN=atp-3 PE=3 SV=1	NA	YPL078c/2e-46/[C] KOG3976 Mitochondrial F1F0-ATP synthase, subunit b/ATP4	A0A067TCF9/5e-122/A0A067TCF9_GALM3 Uncharacterized protein OS=Galerina marginata (strain CBS 339.88) OX=685588 GN=GALMADRAFT_1113791 PE=4 SV=1	PF05405/2.4E-43/Mitochondrial ATP synthase B chain precursor (ATP-synt_B)	NA
RHS07442	XP_002461089.1/2.56253e-28/cytochrome P450 709B2 [Sorghum bicolor] &gt;EER97610.1 hypothetical protein SORBI_3002G389000 [Sorghum bicolor]	Q2MJ19/6e-26/C7A68_MEDTR Cytochrome P450 72A68 OS=Medicago truncatula OX=3880 GN=CYP72A68 PE=1 SV=1	sbi:8063530/5e-29/cytochrome P450 709B2; K20660 cytochrome P450 family 709	CE01657/9e-26/[Q] KOG0158 Cytochrome P450 CYP3/CYP5/CYP6/CYP9 subfamilies	A0A369KGH1/9e-142/A0A369KGH1_HYPMA Uncharacterized protein OS=Hypsizygus marmoreus OX=39966 GN=Hypma_014135 PE=3 SV=1	PR00463/3.6E-12/E-class P450 group I signature	molecular_function:GO:0016705//oxidoreductase activity, acting on paired donors, with incorporation or reduction of molecular oxygen;GO:0020037//heme binding;GO:0005506//iron ion binding;GO:0004497//monooxygenase activity;
RHS07443	NA	NA	NA	NA	A0A0C9XL16/2e-33/A0A0C9XL16_9AGAR Unplaced genomic scaffold K443scaffold_23, whole genome shotgun sequence OS=Laccaria amethystina LaAM-08-1 OX=1095629 GN=K443DRAFT_336812 PE=4 SV=1	NA	NA
RHS07444	NA	NA	NA	NA	A0A0C9YC45/4e-166/A0A0C9YC45_9AGAR Unplaced genomic scaffold K443scaffold_23, whole genome shotgun sequence OS=Laccaria amethystina LaAM-08-1 OX=1095629 GN=K443DRAFT_675015 PE=4 SV=1	NA	NA
RHS07445	XP_005766804.1/8.79227e-16/hypothetical protein EMIHUDRAFT_451801 [Emiliania huxleyi CCMP1516] &gt;EOD14375.1 hypothetical protein EMIHUDRAFT_451801 [Emiliania huxleyi CCMP1516]	Q6GM14/3e-45/DBNLB_XENLA Drebrin-like protein B OS=Xenopus laevis OX=8355 GN=dbnl-b PE=2 SV=1	cre:CHLREDRAFT_111927/7e-16/predicted protein; K01049 acetylcholinesterase [EC:3.1.1.7]	Hs21361670/5e-43/[Z] KOG3655 Drebrins and related actin binding proteins	K5X1B4/0.0/K5X1B4_AGABU Uncharacterized protein OS=Agaricus bisporus var. burnettii (strain JB137-S8 / ATCC MYA-4627 / FGSC 10392) OX=597362 GN=AGABI1DRAFT_35587 PE=3 SV=1	PF00135/8.7E-40/Carboxylesterase family	molecular_function:GO:0016787//hydrolase activity;
RHS07446	XP_005703658.1/3.84169e-113/polysaccharide deacetylase [Galdieria sulphuraria] &gt;EME27138.1 polysaccharide deacetylase [Galdieria sulphuraria]	NA	NA	NA	A0A409W693/0.0/A0A409W693_9AGAR Uncharacterized protein OS=Panaeolus cyanescens OX=181874 GN=CVT24_012623 PE=4 SV=1	PF01522/3.6E-13/Polysaccharide deacetylase	biological_process:GO:0005975//carbohydrate metabolic process;molecular_function:GO:0016810//hydrolase activity, acting on carbon-nitrogen (but not peptide) bonds;
RHS07447	XP_017412494.1/2.06845e-100/PREDICTED: amino-acid permease BAT1-like [Vigna angularis] &gt;BAT93821.1 hypothetical protein VIGAN_08035900 [Vigna angularis var. angularis]	O60113/2e-99/YG64_SCHPO Uncharacterized amino-acid permease C15C4.04c OS=Schizosaccharomyces pombe (strain 972 / ATCC 24843) OX=284812 GN=SPBC15C4.04c PE=3 SV=1	NA	SPBC15C4.04c/7e-100/[E] KOG1289 Amino acid transporters	A0A2H3DWC5/0.0/A0A2H3DWC5_ARMGA Amino acid transporter OS=Armillaria gallica OX=47427 GN=ARMGADRAFT_1051558 PE=4 SV=1	PF13520/2.8E-54/Amino acid permease	biological_process:GO:0089711//L-glutamate transmembrane transport;GO:0015812//gamma-aminobutyric acid transport;GO:1903401//L-lysine transmembrane transport;cellular_component:GO:0005887//integral component of plasma membrane;GO:0016021//integral component of membrane;molecular_function:GO:0005313//L-glutamate transmembrane transporter activity;GO:0015189//L-lysine transmembrane transporter acti…
RHS07448	XP_009842406.1/2.68341e-61/agmatinase [Aphanomyces astaci] &gt;ETV68107.1 agmatinase [Aphanomyces astaci]	Q6CIB4/5e-78/GBU1_KLULA Guanidinobutyrase OS=Kluyveromyces lactis (strain ATCC 8585 / CBS 2359 / DSM 70799 / NBRC 1267 / NRRL Y-1140 / WM37) OX=284590 GN=GBU1 PE=1 SV=1	dzi:111287447/1e-16/arginase 1, mitochondrial-like; K01476 arginase [EC:3.5.3.1]	SPAC11D3.09/2e-141/[E] KOG2964 Arginase family protein	A0A409VQ44/0.0/A0A409VQ44_PSICY Uncharacterized protein OS=Psilocybe cyanescens OX=93625 GN=CVT25_007930 PE=3 SV=1	PS51409/42.484/Arginase family profile.	biological_process:GO:0019538//protein metabolic process;molecular_function:GO:0046872//metal ion binding;GO:0016813//hydrolase activity, acting on carbon-nitrogen (but not peptide) bonds, in linear amidines;
RHS07449	XP_020251774.1/3.46408e-45/protein DETOXIFICATION 16-like [Asparagus officinalis]	Q10085/2e-104/YAO6_SCHPO Uncharacterized transporter C11D3.06 OS=Schizosaccharomyces pombe (strain 972 / ATCC 24843) OX=284812 GN=SPAC11D3.06 PE=3 SV=1	aof:109829095/7e-46/protein DETOXIFICATION 16-like; K03327 multidrug resistance protein, MATE family	SPAC11D3.06/1e-104/[R] KOG1347 Uncharacterized membrane protein, predicted efflux pump	A0A067TPN3/0.0/A0A067TPN3_GALM3 Uncharacterized protein OS=Galerina marginata (strain CBS 339.88) OX=685588 GN=GALMADRAFT_91594 PE=4 SV=1	PF01554/4.8E-7/MatE	NA
RHS07450	XP_022137197.1/0/dolichyl-diphosphooligosaccharide--protein glycosyltransferase subunit STT3B [Momordica charantia]	O94335/0.0/STT3_SCHPO Dolichyl-diphosphooligosaccharide--protein glycosyltransferase subunit stt3 OS=Schizosaccharomyces pombe (strain 972 / ATCC 24843) OX=284812 GN=stt3 PE=3 SV=1	mcha:111008722/0.0/dolichyl-diphosphooligosaccharide--protein glycosyltransferase subunit STT3B; K07151 dolichyl-diphosphooligosaccharide---protein glycosyltransferase [EC:2.4.99.18]	SPBC1271.02/0.0/[O] KOG2292 Oligosaccharyltransferase, STT3 subunit	A0A067TLY1/0.0/A0A067TLY1_GALM3 Uncharacterized protein OS=Galerina marginata (strain CBS 339.88) OX=685588 GN=GALMADRAFT_241421 PE=4 SV=1	PF02516/6.2E-137/Oligosaccharyl transferase STT3 subunit	biological_process:GO:0043687//post-translational protein modification;GO:0006486//protein glycosylation;GO:0018279//protein N-linked glycosylation via asparagine;cellular_component:GO:0008250//oligosaccharyltransferase complex;GO:0016021//integral component of membrane;molecular_function:GO:0004579//dolichyl-diphosphooligosaccharide-protein glycotransferase activity;GO:0004576//oligosaccharyl tr…
RHS07451	BAX08939.1/0/dynamin-related protein3 [Marchantia polymorpha]	Q09748/0.0/DNM1_SCHPO Dynamin-related protein dnm1 OS=Schizosaccharomyces pombe (strain 972 / ATCC 24843) OX=284812 GN=dnm1 PE=3 SV=1	atr:18442608/0.0/dynamin-related protein 3A; K17065 dynamin 1-like protein [EC:3.6.5.5]	SPBC12C2.08/0.0/[UR] KOG0446 Vacuolar sorting protein VPS1, dynamin, and related proteins	A0A369JDI7/0.0/A0A369JDI7_HYPMA Dynamin-related protein DNM1 OS=Hypsizygus marmoreus OX=39966 GN=DNM1 PE=3 SV=1	PF00350/3.3E-53/Dynamin family	molecular_function:GO:0005525//GTP binding;GO:0003924//GTPase activity;
RHS07452	XP_005828728.1/4.54061e-65/hypothetical protein GUITHDRAFT_74509 [Guillardia theta CCMP2712] &gt;EKX41748.1 hypothetical protein GUITHDRAFT_74509 [Guillardia theta CCMP2712]	Q54DY9/5e-64/BCS1B_DICDI Probable mitochondrial chaperone BCS1-B OS=Dictyostelium discoideum OX=44689 GN=bcsl1b PE=3 SV=1	ota:OT_ostta07g00590/2e-41/Mitochondrial chaperone BCS1; K08900 mitochondrial chaperone BCS1	SPAC644.07/6e-61/[O] KOG0743 AAA+-type ATPase	A0A067NS19/0.0/A0A067NS19_PLEOS Uncharacterized protein OS=Pleurotus ostreatus PC15 OX=1137138 GN=PLEOSDRAFT_1065807 PE=3 SV=1	PF00004/6.1E-14/ATPase family associated with various cellular activities (AAA)	biological_process:GO:0034551//mitochondrial respiratory chain complex III assembly;cellular_component:GO:0016021//integral component of membrane;GO:0005739//mitochondrion;molecular_function:GO:0005524//ATP binding;
RHS07453	XP_020584164.1/3.08121e-10/protein SYS1 homolog [Phalaenopsis equestris]	A4K2W1/3e-07/SYS1_PONAB Protein SYS1 homolog OS=Pongo abelii OX=9601 GN=SYS1 PE=3 SV=1	peq:110027159/6e-11/protein SYS1 homolog; K20318 protein SYS1	CE29338/6e-07/[U] KOG4697 Integral membrane protein involved in transport between the late Golgi and endosome	A0A0C9XKX0/2e-118/A0A0C9XKX0_9AGAR Unplaced genomic scaffold K443scaffold_23, whole genome shotgun sequence OS=Laccaria amethystina LaAM-08-1 OX=1095629 GN=K443DRAFT_674962 PE=4 SV=1	PF09801/1.2E-16/Integral membrane protein S linking to the trans Golgi network	cellular_component:GO:0016021//integral component of membrane;
RHS07454	XP_005825070.1/2.76214e-43/hypothetical protein GUITHDRAFT_165325 [Guillardia theta CCMP2712] &gt;EKX38090.1 hypothetical protein GUITHDRAFT_165325 [Guillardia theta CCMP2712]	C4JHY5/4e-153/DAPB_UNCRE Probable dipeptidyl-aminopeptidase B OS=Uncinocarpus reesii (strain UAMH 1704) OX=336963 GN=DAPB PE=3 SV=1	ppp:112279589/7e-37/uncharacterized protein LOC112279589 isoform X1; K01278 dipeptidyl-peptidase 4 [EC:3.4.14.5]	SPACUNK4.08/1e-122/[O] KOG2100 Dipeptidyl aminopeptidase	A0A2A9NTD9/0.0/A0A2A9NTD9_9AGAR Uncharacterized protein OS=Amanita thiersii Skay4041 OX=703135 GN=AMATHDRAFT_80539 PE=3 SV=1	PF00326/2.3E-31/Prolyl oligopeptidase family	molecular_function:GO:0008236//serine-type peptidase activity;
RHS07455	GAQ86613.1/2.6752e-47/Mitochondrial substrate carrier protein (carnitine/acylcarnitine?) [Klebsormidium nitens]	Q5HZE0/6e-47/MCATL_RAT Mitochondrial basic amino acids transporter OS=Rattus norvegicus OX=10116 GN=Slc25a29 PE=2 SV=1	mus:104000812/3e-43/mitochondrial arginine transporter BAC2-like; K15109 solute carrier family 25 (mitochondrial carnitine/acylcarnitine transporter), member 20/29	Hs18583647/3e-46/[C] KOG0762 Mitochondrial carrier protein	A0A2A9NNQ7/6e-147/A0A2A9NNQ7_9AGAR Uncharacterized protein OS=Amanita thiersii Skay4041 OX=703135 GN=AMATHDRAFT_80541 PE=3 SV=1	PS50920/22.449/Solute carrier (Solcar) repeat profile.	biological_process:GO:0006810//transport;GO:0055085//transmembrane transport;cellular_component:GO:0016021//integral component of membrane;
RHS07456	NA	NA	NA	NA	A0A2H3JEA7/2e-21/A0A2H3JEA7_WOLCO Uncharacterized protein (Fragment) OS=Wolfiporia cocos (strain MD-104) OX=742152 GN=WOLCODRAFT_52880 PE=4 SV=1	PS50011/9.687/Protein kinase domain profile.	NA
RHS07457	NA	NA	NA	NA	A0A2H3J476/2e-08/A0A2H3J476_WOLCO Uncharacterized protein OS=Wolfiporia cocos (strain MD-104) OX=742152 GN=WOLCODRAFT_159517 PE=4 SV=1	NA	NA
RHS07458	NA	NA	NA	NA	A0A2H3JEA7/3e-23/A0A2H3JEA7_WOLCO Uncharacterized protein (Fragment) OS=Wolfiporia cocos (strain MD-104) OX=742152 GN=WOLCODRAFT_52880 PE=4 SV=1	NA	NA
RHS07459	XP_008875489.1/1.39481e-54/hypothetical protein, variant [Aphanomyces invadans] &gt;ETV95739.1 hypothetical protein, variant [Aphanomyces invadans]	Q96RS0/7e-60/TGS1_HUMAN Trimethylguanosine synthase OS=Homo sapiens OX=9606 GN=TGS1 PE=1 SV=3	nta:107830514/4e-53/trimethylguanosine synthase-like; K14292 trimethylguanosine synthase [EC:2.1.1.-]	Hs19923661/3e-60/[R] KOG2730 Methylase	A0A0C9WU25/1e-154/A0A0C9WU25_9AGAR Unplaced genomic scaffold K443scaffold_55, whole genome shotgun sequence OS=Laccaria amethystina LaAM-08-1 OX=1095629 GN=K443DRAFT_96583 PE=4 SV=1	PF09445/9.9E-7/RNA cap guanine-N2 methyltransferase	biological_process:GO:0001510//RNA methylation;GO:0009452//7-methylguanosine RNA capping;molecular_function:GO:0008168//methyltransferase activity;
RHS07460	NA	NA	NA	NA	A0A0C3EV68/2e-108/A0A0C3EV68_9AGAM Uncharacterized protein OS=Piloderma croceum F 1598 OX=765440 GN=PILCRDRAFT_830179 PE=4 SV=1	PS50011/9.941/Protein kinase domain profile.	NA
RHS07461	NA	NA	NA	NA	A0A165RTW8/4e-31/A0A165RTW8_9APHY Uncharacterized protein OS=Daedalea quercina L-15889 OX=1314783 GN=DAEQUDRAFT_755950 PE=4 SV=1	PS50011/9.15/Protein kinase domain profile.	NA
RHS07462	NA	NA	NA	NA	A0A0C3EV68/2e-45/A0A0C3EV68_9AGAM Uncharacterized protein OS=Piloderma croceum F 1598 OX=765440 GN=PILCRDRAFT_830179 PE=4 SV=1	NA	NA
RHS07463	XP_002971280.1/2.50149e-48/hypothetical protein SELMODRAFT_95290, partial [Selaginella moellendorffii] &gt;EFJ27878.1 hypothetical protein SELMODRAFT_95290, partial [Selaginella moellendorffii]	Q923W1/5e-52/TGS1_MOUSE Trimethylguanosine synthase OS=Mus musculus OX=10090 GN=Tgs1 PE=1 SV=2	egr:104423247/1e-48/trimethylguanosine synthase; K14292 trimethylguanosine synthase [EC:2.1.1.-]	Hs19923661/2e-52/[R] KOG2730 Methylase	A0A0C9WU25/1e-134/A0A0C9WU25_9AGAR Unplaced genomic scaffold K443scaffold_55, whole genome shotgun sequence OS=Laccaria amethystina LaAM-08-1 OX=1095629 GN=K443DRAFT_96583 PE=4 SV=1	PF09445/1.1E-26/RNA cap guanine-N2 methyltransferase	biological_process:GO:0001510//RNA methylation;GO:0009452//7-methylguanosine RNA capping;molecular_function:GO:0008168//methyltransferase activity;
RHS05472	NA	A8NCK6/8e-19/COX2_COPC7 Cytochrome P450 monooxygenase COX2 OS=Coprinopsis cinerea (strain Okayama-7 / 130 / ATCC MYA-4618 / FGSC 9003) OX=240176 GN=COX2 PE=1 SV=1	peq:110038151/5e-07/flavonoid 3'-monooxygenase-like; K05280 flavonoid 3'-monooxygenase [EC:1.14.14.82]	Hs4503199/2e-08/[Q] KOG0156 Cytochrome P450 CYP2 subfamily	A0A369J637/7e-31/A0A369J637_HYPMA Uncharacterized protein OS=Hypsizygus marmoreus OX=39966 GN=Hypma_001246 PE=3 SV=1	PF00067/2.0E-12/Cytochrome P450	NA
RHS05473	NA	NA	NA	NA	A0A409YGR7/6e-46/A0A409YGR7_9AGAR Uncharacterized protein OS=Gymnopilus dilepis OX=231916 GN=CVT26_012109 PE=4 SV=1	NA	NA
RHS05474	XP_005822842.1/4.26053e-26/hypothetical protein GUITHDRAFT_79406 [Guillardia theta CCMP2712] &gt;EKX35862.1 hypothetical protein GUITHDRAFT_79406 [Guillardia theta CCMP2712]	P20816/8e-27/CP4A2_RAT Cytochrome P450 4A2 OS=Rattus norvegicus OX=10116 GN=Cyp4a2 PE=1 SV=2	atr:18429049/2e-26/cytochrome P450 734A1; K15639 PHYB activation tagged suppressor 1 [EC:1.14.-.-]	Hs4503231/2e-23/[Q] KOG0158 Cytochrome P450 CYP3/CYP5/CYP6/CYP9 subfamilies	A0A369JYU0/0.0/A0A369JYU0_HYPMA Uncharacterized protein OS=Hypsizygus marmoreus OX=39966 GN=Hypma_007792 PE=3 SV=1	PR00385/2.1E-6/P450 superfamily signature	cellular_component:GO:0016021//integral component of membrane;molecular_function:GO:0016705//oxidoreductase activity, acting on paired donors, with incorporation or reduction of molecular oxygen;GO:0020037//heme binding;GO:0005506//iron ion binding;GO:0004497//monooxygenase activity;
RHS05475	XP_006838406.1/2.99534e-29/cytochrome P450 734A1 [Amborella trichopoda] &gt;ERN00975.1 hypothetical protein AMTR_s00002p00093850 [Amborella trichopoda]	Q2MJ19/4e-24/C7A68_MEDTR Cytochrome P450 72A68 OS=Medicago truncatula OX=3880 GN=CYP72A68 PE=1 SV=1	atr:18429050/6e-30/cytochrome P450 734A1; K15639 PHYB activation tagged suppressor 1 [EC:1.14.-.-]	At2g46950/3e-23/[QI] KOG0157 Cytochrome P450 CYP4/CYP19/CYP26 subfamilies	A0A369JYU0/0.0/A0A369JYU0_HYPMA Uncharacterized protein OS=Hypsizygus marmoreus OX=39966 GN=Hypma_007792 PE=3 SV=1	PF00067/5.6E-50/Cytochrome P450	cellular_component:GO:0016021//integral component of membrane;molecular_function:GO:0016705//oxidoreductase activity, acting on paired donors, with incorporation or reduction of molecular oxygen;GO:0020037//heme binding;GO:0005506//iron ion binding;GO:0004497//monooxygenase activity;
RHS05476	NA	NA	NA	NA	A0A369J8K4/6e-66/A0A369J8K4_HYPMA Uncharacterized protein OS=Hypsizygus marmoreus OX=39966 GN=Hypma_002602 PE=4 SV=1	NA	NA
RHS05477	NA	NA	NA	NA	A0A369JHQ7/3e-151/A0A369JHQ7_HYPMA Uncharacterized protein OS=Hypsizygus marmoreus OX=39966 GN=Hypma_011802 PE=4 SV=1	PF02765/8.1E-12/Telomeric single stranded DNA binding POT1/CDC13	NA
RHS05478	XP_002176714.1/6.35086e-73/bifunctional 6-phosphofructo-2-kinase [Phaeodactylum tricornutum CCAP 1055/1] &gt;EEC51177.1 bifunctional 6-phosphofructo-2-kinase [Phaeodactylum tricornutum CCAP 1055/1]	P25114/2e-66/F264_RAT 6-phosphofructo-2-kinase/fructose-2,6-bisphosphatase 4 OS=Rattus norvegicus OX=10116 GN=Pfkfb4 PE=1 SV=3	gsl:Gasu_45440/5e-72/bifunctional 6-phosphofructo-2-kinase / fructose-2,6-bisphosphatase; K19029 6-phosphofructo-2-kinase / fructose-2,6-biphosphatase 2 [EC:2.7.1.105 3.1.3.46]	YLR345w/5e-83/[G] KOG0234 Fructose-6-phosphate 2-kinase/fructose-2,6-biphosphatase	A0A0C9XXQ8/0.0/A0A0C9XXQ8_9AGAR Unplaced genomic scaffold K443scaffold_18, whole genome shotgun sequence OS=Laccaria amethystina LaAM-08-1 OX=1095629 GN=K443DRAFT_674378 PE=4 SV=1	PF01591/3.0E-50/6-phosphofructo-2-kinase	biological_process:GO:0006003//fructose 2,6-bisphosphate metabolic process;GO:0006000//fructose metabolic process;molecular_function:GO:0004331//fructose-2,6-bisphosphate 2-phosphatase activity;GO:0005524//ATP binding;GO:0003873//6-phosphofructo-2-kinase activity;
RHS05479	XP_008861025.1/3.2077e-13/hypothetical protein, variant 2 [Aphanomyces invadans] &gt;ETW09614.1 hypothetical protein, variant 2 [Aphanomyces invadans]	Q09330/3e-23/MLO3_SCHPO mRNA export protein mlo3 OS=Schizosaccharomyces pombe (strain 972 / ATCC 24843) OX=284812 GN=mlo3 PE=1 SV=1	cit:102629336/4e-14/THO complex subunit 4A; K12881 THO complex subunit 4	SPBC1D7.04c/1e-23/[A] KOG0533 RRM motif-containing protein	A0A067TN44/1e-83/A0A067TN44_GALM3 Uncharacterized protein OS=Galerina marginata (strain CBS 339.88) OX=685588 GN=GALMADRAFT_136864 PE=4 SV=1	PS50102/14.76/Eukaryotic RNA Recognition Motif (RRM) profile.	molecular_function:GO:0003723//RNA binding;
RHS05480	NA	NA	NA	NA	A0A0C2YBH2/9e-76/A0A0C2YBH2_HEBCY Uncharacterized protein OS=Hebeloma cylindrosporum h7 OX=686832 GN=M413DRAFT_63520 PE=4 SV=1	NA	NA
RHS05481	XP_016572263.1/8.00152e-29/PREDICTED: phosphoenolpyruvate carboxylase kinase 1 [Capsicum annuum]	P08092/1e-70/RAN1_SCHPO Negative regulator of sexual conjugation and meiosis OS=Schizosaccharomyces pombe (strain 972 / ATCC 24843) OX=284812 GN=ran1 PE=1 SV=2	cann:107870291/2e-29/phosphoenolpyruvate carboxylase kinase 1; K08794 calcium/calmodulin-dependent protein kinase I [EC:2.7.11.17]	SPBC19C2.05/4e-71/[T] KOG0583 Serine/threonine protein kinase	A0A0C9XMS2/0.0/A0A0C9XMS2_9AGAR Unplaced genomic scaffold K443scaffold_18, whole genome shotgun sequence OS=Laccaria amethystina LaAM-08-1 OX=1095629 GN=K443DRAFT_3167 PE=4 SV=1	PF00069/2.4E-43/Protein kinase domain	biological_process:GO:0007165//signal transduction;cellular_component:GO:0016021//integral component of membrane;molecular_function:GO:0004674//protein serine/threonine kinase activity;GO:0005524//ATP binding;
RHS05482	XP_001769433.1/2.54529e-19/predicted protein [Physcomitrella patens] &gt;EDQ65802.1 predicted protein [Physcomitrella patens]	Q10234/1e-36/RT05_SCHPO Probable 37S ribosomal protein S5, mitochondrial OS=Schizosaccharomyces pombe (strain 972 / ATCC 24843) OX=284812 GN=mrp5 PE=1 SV=1	ppp:112285369/5e-20/uncharacterized protein LOC112285369; K02988 small subunit ribosomal protein S5	SPAC4G9.17c/6e-37/[J] KOG2646 Ribosomal protein S5	A0A409VLV4/2e-127/A0A409VLV4_9AGAR Uncharacterized protein OS=Gymnopilus dilepis OX=231916 GN=CVT26_007291 PE=3 SV=1	PF03719/6.5E-18/Ribosomal protein S5, C-terminal domain	biological_process:GO:0006412//translation;cellular_component:GO:0005840//ribosome;GO:0005763//mitochondrial small ribosomal subunit;GO:0005802//trans-Golgi network;GO:0005768//endosome;GO:0005794//Golgi apparatus;molecular_function:GO:0003723//RNA binding;GO:0003735//structural constituent of ribosome;
RHS05483	NA	NA	NA	NA	A0A067T1Y0/5e-60/A0A067T1Y0_GALM3 Uncharacterized protein OS=Galerina marginata (strain CBS 339.88) OX=685588 GN=GALMADRAFT_246490 PE=4 SV=1	NA	NA
RHS05484	XP_014527002.1/7.37556e-09/hypoxanthine phosphoribosyltransferase [Blastocystis sp. subtype 4] &gt;KNB43559.1 hypoxanthine phosphoribosyltransferase [Blastocystis sp. subtype 4]	Q08280/1e-27/BSC6_YEAST Bypass of stop codon protein 6 OS=Saccharomyces cerevisiae (strain ATCC 204508 / S288c) OX=559292 GN=BSC6 PE=1 SV=1	NA	NA	A0A067P642/0.0/A0A067P642_PLEOS Uncharacterized protein OS=Pleurotus ostreatus PC15 OX=1137138 GN=PLEOSDRAFT_1110982 PE=4 SV=1	PS50850/9.059/Major facilitator superfamily (MFS) profile.	NA
RHS05485	NA	NA	NA	NA	A0A369K883/4e-46/A0A369K883_HYPMA Uncharacterized protein OS=Hypsizygus marmoreus OX=39966 GN=Hypma_005790 PE=4 SV=1	NA	NA
RHS05486	XP_002951795.1/3.85805e-60/histone H2A [Volvox carteri f. nagariensis] &gt;EFJ47246.1 histone H2A [Volvox carteri f. nagariensis]	Q9HGX4/8e-69/H2A_AGABI Histone H2A OS=Agaricus bisporus OX=5341 PE=2 SV=3	vcn:VOLCADRAFT_81576/7e-61/hstH2A-9; histone H2A; K11251 histone H2A	Hs16158282/8e-64/[B] KOG1756 Histone 2A	A0A409X7H5/6e-85/A0A409X7H5_PSICY Histone H2A OS=Psilocybe cyanescens OX=93625 GN=CVT25_006760 PE=3 SV=1	PR00620/5.2E-50/Histone H2A signature	cellular_component:GO:0005634//nucleus;GO:0000786//nucleosome;molecular_function:GO:0003677//DNA binding;GO:0046982//protein heterodimerization activity;
RHS05487	XP_013682136.1/2.5504e-48/PREDICTED: histone H2B.3-like [Brassica napus]	P78567/9e-66/H2B_AGABI Histone H2B OS=Agaricus bisporus OX=5341 GN=htbA PE=2 SV=3	cme:CYME_CMN173C/4e-49/histone H2B; K11252 histone H2B	YBL002w/4e-59/[B] KOG1744 Histone H2B	A0A0D2MNH6/4e-74/A0A0D2MNH6_9AGAR Histone H2B OS=Hypholoma sublateritium FD-334 SS-4 OX=945553 GN=HYPSUDRAFT_134601 PE=3 SV=1	PF00125/2.4E-21/Core histone H2A/H2B/H3/H4	cellular_component:GO:0005634//nucleus;GO:0000786//nucleosome;molecular_function:GO:0003677//DNA binding;GO:0046982//protein heterodimerization activity;
RHS05488	ONM02977.1/4.70941e-13/Putative L-ascorbate peroxidase 6 [Zea mays]	D4AUF4/2e-64/WSCD2_ARTBC WSC domain-containing protein ARB_07870 OS=Arthroderma benhamiae (strain ATCC MYA-4681 / CBS 112371) OX=663331 GN=ARB_07870 PE=1 SV=1	dosa:Os08t0522400-01/2e-12/Os08g0522400; Similar to APX6; L-ascorbate peroxidase/ heme binding / peroxidase.; K00434 L-ascorbate peroxidase [EC:1.11.1.11]	At4g35970/3e-08/[R] TWOG0189 Peroxidase	A8NEV6/2e-149/A8NEV6_COPC7 Peroxidase OS=Coprinopsis cinerea (strain Okayama-7 / 130 / ATCC MYA-4618 / FGSC 9003) OX=240176 GN=CC1G_01201 PE=3 SV=2	PF00141/6.9E-19/Peroxidase	NA
RHS05489	XP_012201002.1/8.91595e-15/hypothetical protein SPRG_06223 [Saprolegnia parasitica CBS 223.65] &gt;KDO28175.1 hypothetical protein SPRG_06223 [Saprolegnia parasitica CBS 223.65]	A7MB11/1e-13/TGFA1_BOVIN Transforming growth factor-beta receptor-associated protein 1 OS=Bos taurus OX=9913 GN=TGFBRAP1 PE=2 SV=1	csat:104729520/3e-07/vam6/Vps39-like protein; K20183 Vam6/Vps39-like protein vacuolar protein sorting-associated protein 39	Hs21359865/5e-13/[U] KOG2063 Vacuolar assembly/sorting proteins VPS39/VAM6/VPS3	A0A0C3GL48/1e-142/A0A0C3GL48_9AGAM Uncharacterized protein OS=Piloderma croceum F 1598 OX=765440 GN=PILCRDRAFT_810582 PE=4 SV=1	PF00780/5.6E-9/CNH domain	NA
RHS05448	NA	NA	NA	NA	NA	NA	NA
RHS05449	GAQ83591.1/3.45676e-25/DHHC-type zinc finger family protein [Klebsormidium nitens]	Q9ESG8/2e-23/ZDH16_MOUSE Palmitoyltransferase ZDHHC16 OS=Mus musculus OX=10090 GN=Zdhhc16 PE=1 SV=2	gsl:Gasu_01230/7e-23/zinc finger (DHHC type) family protein; K20028 palmitoyltransferase ZDHHC2/15/20 [EC:2.3.1.225]	Hs14150106/6e-26/[R] KOG1313 DHHC-type Zn-finger proteins	A0A0C9WJM5/2e-153/A0A0C9WJM5_9AGAR Palmitoyltransferase OS=Laccaria amethystina LaAM-08-1 OX=1095629 GN=K443DRAFT_639958 PE=3 SV=1	PS50216/22.168/DHHC domain profile.	cellular_component:GO:0016021//integral component of membrane;molecular_function:GO:0019706//protein-cysteine S-palmitoyltransferase activity;
RHS05450	P42769.1/6.6618e-43/RecName: Full=Glutathione S-transferase PM239X14; AltName: Full=GST class-phi &gt;CAA48376.1 glutathione transferase [Arabidopsis thaliana]	B3FWR8/3e-48/HPM2_HYPSB Glutathione S-transferase hmp2 OS=Hypomyces subiculosus OX=193393 GN=hpm2 PE=1 SV=1	pda:103718626/2e-42/probable glutathione S-transferase GSTF1; K00799 glutathione S-transferase [EC:2.5.1.18]	At3g03190/7e-38/[O] KOG0867 Glutathione S-transferase	A0A067SCA7/3e-94/A0A067SCA7_GALM3 Uncharacterized protein OS=Galerina marginata (strain CBS 339.88) OX=685588 GN=GALMADRAFT_256820 PE=3 SV=1	PF02798/1.0E-16/Glutathione S-transferase, N-terminal domain	molecular_function:GO:0016740//transferase activity;
RHS03159	BAK07316.1/2.96336e-99/predicted protein [Hordeum vulgare subsp. vulgare]	P78820/2e-88/ACAC_SCHPO Acetyl-CoA carboxylase OS=Schizosaccharomyces pombe (strain 972 / ATCC 24843) OX=284812 GN=cut6 PE=1 SV=2	pxb:103966543/9e-60/acetyl-CoA carboxylase 1-like; K11262 acetyl-CoA carboxylase / biotin carboxylase 1 [EC:6.4.1.2 6.3.4.14 2.1.3.15]	SPAC56E4.04c/9e-89/[I] KOG0368 Acetyl-CoA carboxylase	A0A0D0BXL2/1e-114/A0A0D0BXL2_9AGAR Unplaced genomic scaffold GYMLUscaffold_27, whole genome shotgun sequence OS=Gymnopus luxurians FD-317 M1 OX=944289 GN=GYMLUDRAFT_43751 PE=4 SV=1	PS50979/17.696/Biotin carboxylation domain profile.	molecular_function:GO:0046872//metal ion binding;GO:0004075//biotin carboxylase activity;GO:0005524//ATP binding;
RHS03160	BAK06922.1/2.82037e-128/predicted protein [Hordeum vulgare subsp. vulgare]	O14241/8e-110/ARPC2_SCHPO Actin-related protein 2/3 complex subunit 2 OS=Schizosaccharomyces pombe (strain 972 / ATCC 24843) OX=284812 GN=arc2 PE=1 SV=1	pop:7481228/4e-48/actin-related protein 2/3 complex subunit 2A isoform X2; K05758 actin related protein 2/3 complex, subunit 2	SPAC6F6.10c/3e-110/[Z] KOG2826 Actin-related protein Arp2/3 complex, subunit ARPC2	A0A2A9NN39/0.0/A0A2A9NN39_9AGAR Arp2/3 complex 34 kDa subunit OS=Amanita thiersii Skay4041 OX=703135 GN=AMATHDRAFT_58189 PE=3 SV=1	PF04045/3.1E-109/Arp2/3 complex, 34 kD subunit p34-Arc	biological_process:GO:0034314//Arp2/3 complex-mediated actin nucleation;GO:0030041//actin filament polymerization;cellular_component:GO:0005885//Arp2/3 protein complex;GO:0005737//cytoplasm;molecular_function:GO:0003779//actin binding;
RHS03161	NA	O14100/1e-14/ZDS1_SCHPO Protein zds1 OS=Schizosaccharomyces pombe (strain 972 / ATCC 24843) OX=284812 GN=zds1 PE=1 SV=2	NA	NA	A0A0C9Y528/0.0/A0A0C9Y528_9AGAR Unplaced genomic scaffold K443scaffold_5, whole genome shotgun sequence OS=Laccaria amethystina LaAM-08-1 OX=1095629 GN=K443DRAFT_672044 PE=4 SV=1	PF08632/4.2E-28/Activator of mitotic machinery Cdc14 phosphatase activation C-term	NA
RHS03162	NA	NA	NA	NA	A0A409XJ53/2e-75/A0A409XJ53_PSICY Uncharacterized protein OS=Psilocybe cyanescens OX=93625 GN=CVT25_010163 PE=4 SV=1	PF11176/8.2E-8/Translation machinery-associated protein 16	NA
RHS03163	ONM00373.1/2.5535e-28/Choline-phosphate cytidylyltransferase 2 [Zea mays]	F4JJE0/2e-27/CCT2_ARATH Choline-phosphate cytidylyltransferase 2 OS=Arabidopsis thaliana OX=3702 GN=CCT2 PE=1 SV=1	dzi:111283952/2e-29/choline-phosphate cytidylyltransferase 2-like; K00968 choline-phosphate cytidylyltransferase [EC:2.7.7.15]	At4g15130/9e-28/[I] KOG2804 Phosphorylcholine transferase/cholinephosphate cytidylyltransferase	B0CUE5/6e-73/B0CUE5_LACBS Cholinephosphate cytidylyltransferase OS=Laccaria bicolor (strain S238N-H82 / ATCC MYA-4686) OX=486041 GN=LACBIDRAFT_305504 PE=4 SV=1	TIGR00125/4.1E-8/cyt_tran_rel: cytidyltransferase-like domain	biological_process:GO:0009058//biosynthetic process;molecular_function:GO:0003824//catalytic activity;
RHS03164	KOO41264.1/1.93211e-33/hypothetical protein Ctob_014969, partial [Chrysochromulina sp. CCMP291]	P47043/1e-37/ZAP1_YEAST Zinc-responsive transcriptional regulator ZAP1 OS=Saccharomyces cerevisiae (strain ATCC 204508 / S288c) OX=559292 GN=ZAP1 PE=1 SV=1	brp:103864861/3e-16/ZCHP2; uncharacterized zinc finger protein At4g06634; K09201 transcription factor YY	YJL056c/5e-38/[R] KOG1721 FOG: Zn-finger	A0A369JNC6/8e-164/A0A369JNC6_HYPMA Zinc-responsive transcriptional regulator ZAP1 OS=Hypsizygus marmoreus OX=39966 GN=ZAP1 PE=4 SV=1	PS50157/14.046/Zinc finger C2H2 type domain profile.	molecular_function:GO:0003676//nucleic acid binding;
RHS03165	XP_002502641.1/2.39217e-10/predicted protein [Micromonas commoda] &gt;ACO63899.1 predicted protein [Micromonas commoda]	Q3UGP9/2e-09/LRC58_MOUSE Leucine-rich repeat-containing protein 58 OS=Mus musculus OX=10090 GN=Lrrc58 PE=2 SV=1	mis:MICPUN_101709/6e-07/predicted protein; K19613 leucine-rich repeat protein SHOC2	Hs16158332/8e-10/[R] KOG0619 FOG: Leucine rich repeat	A0A137QH70/9e-77/A0A137QH70_9AGAR p53-induced protein with a death domain OS=Leucoagaricus sp. SymC.cos OX=1714833 GN=AN958_09908 PE=4 SV=1	PF13855/4.6E-7/Leucine rich repeat	molecular_function:GO:0004842//ubiquitin-protein transferase activity;
RHS03166	NA	Q09727/4e-11/MRP20_SCHPO 54S ribosomal protein L23, mitochondrial OS=Schizosaccharomyces pombe (strain 972 / ATCC 24843) OX=284812 GN=mrp20 PE=3 SV=1	NA	SPAC31A2.08/2e-11/[J] KOG4089 Predicted mitochondrial ribosomal protein L23	A0A369JTQ3/8e-144/A0A369JTQ3_HYPMA 54S ribosomal protein L23, mitochondrial OS=Hypsizygus marmoreus OX=39966 GN=mrp20 PE=4 SV=1	PF00276/2.4E-6/Ribosomal protein L23	NA
RHS03167	XP_006279645.1/1.90137e-41/hypothetical protein CARUB_v10026568mg [Capsella rubella] &gt;EOA12543.1 hypothetical protein CARUB_v10026568mg [Capsella rubella]	Q05924/2e-41/DCR2_YEAST Phosphatase DCR2 OS=Saccharomyces cerevisiae (strain ATCC 204508 / S288c) OX=559292 GN=DCR2 PE=1 SV=1	cvr:CHLNCDRAFT_134697/1e-13/hypothetical protein; K12867 pre-mRNA-splicing factor SYF1	YLR361c/8e-42/[R] KOG1432 Predicted DNA repair exonuclease SIA1	A0A067TNK1/0.0/A0A067TNK1_GALM3 Uncharacterized protein OS=Galerina marginata (strain CBS 339.88) OX=685588 GN=GALMADRAFT_90903 PE=4 SV=1	PF00149/1.7E-15/Calcineurin-like phosphoesterase	molecular_function:GO:0016787//hydrolase activity;
RHS03168	NA	P41697/2e-30/BUD6_YEAST Bud site selection protein 6 OS=Saccharomyces cerevisiae (strain ATCC 204508 / S288c) OX=559292 GN=BUD6 PE=1 SV=1	NA	NA	A0A0C9X9W8/0.0/A0A0C9X9W8_9AGAR Unplaced genomic scaffold K443scaffold_5, whole genome shotgun sequence OS=Laccaria amethystina LaAM-08-1 OX=1095629 GN=K443DRAFT_672050 PE=4 SV=1	PF03915/1.6E-136/Actin interacting protein 3	NA
RHS03169	NA	NA	NA	NA	A0A369JQ37/1e-106/A0A369JQ37_HYPMA Uncharacterized protein OS=Hypsizygus marmoreus OX=39966 GN=Hypma_009102 PE=4 SV=1	NA	NA
RHS03170	NA	NA	NA	NA	A0A1C7LR50/1e-128/A0A1C7LR50_GRIFR Uncharacterized protein OS=Grifola frondosa OX=5627 GN=A0H81_14733 PE=4 SV=1	NA	NA
RHS03171	NA	NA	NA	NA	A0A067TKU9/5e-141/A0A067TKU9_GALM3 Uncharacterized protein OS=Galerina marginata (strain CBS 339.88) OX=685588 GN=GALMADRAFT_240831 PE=4 SV=1	PS50097/9.393/BTB domain profile.	NA
RHS03172	OQS03681.1/3.59144e-103/dihydroorotate dehydrogenase, mitochondrial precursor [Thraustotheca clavata]	Q6CTX8/1e-118/PYRD2_KLULA Dihydroorotate dehydrogenase (quinone), mitochondrial OS=Kluyveromyces lactis (strain ATCC 8585 / CBS 2359 / DSM 70799 / NBRC 1267 / NRRL Y-1140 / WM37) OX=284590 GN=URA9 PE=3 SV=1	cann:107838712/2e-98/dihydroorotate dehydrogenase (quinone), mitochondrial; K00254 dihydroorotate dehydrogenase [EC:1.3.5.2]	SPAC57A10.12c/1e-118/[F] KOG1436 Dihydroorotate dehydrogenase	A0A0C2YVC4/0.0/A0A0C2YVC4_HEBCY Dihydroorotate dehydrogenase (quinone), mitochondrial OS=Hebeloma cylindrosporum h7 OX=686832 GN=M413DRAFT_25359 PE=3 SV=1	TIGR01036/7.9E-103/pyrD_sub2: dihydroorotate dehydrogenase (fumarate)	biological_process:GO:0044205//'de novo' UMP biosynthetic process;GO:0006207//'de novo' pyrimidine nucleobase biosynthetic process;cellular_component:GO:0005743//mitochondrial inner membrane;molecular_function:GO:0004152//dihydroorotate dehydrogenase activity;
RHS03173	XP_010916537.1/9.55322e-145/PREDICTED: importin-4 [Elaeis guineensis]	O60100/0.0/IMB4_SCHPO Probable importin subunit beta-4 OS=Schizosaccharomyces pombe (strain 972 / ATCC 24843) OX=284812 GN=kap123 PE=3 SV=1	egu:105041314/2e-145/importin-4; K20221 importin-4	SPBC14F5.03c/0.0/[YU] KOG2171 Karyopherin (importin) beta 3	A0A0C3CMA5/0.0/A0A0C3CMA5_HEBCY Uncharacterized protein OS=Hebeloma cylindrosporum h7 OX=686832 GN=M413DRAFT_366261 PE=4 SV=1	PS50166/9.464/Importin-beta N-terminal domain profile.	NA
RHS03174	NA	P38928/2e-18/AXL2_YEAST Axial budding pattern protein 2 OS=Saccharomyces cerevisiae (strain ATCC 204508 / S288c) OX=559292 GN=AXL2 PE=1 SV=1	NA	NA	A0A0C9YF51/0.0/A0A0C9YF51_9AGAR Unplaced genomic scaffold K443scaffold_5, whole genome shotgun sequence OS=Laccaria amethystina LaAM-08-1 OX=1095629 GN=K443DRAFT_128014 PE=4 SV=1	PF05345/1.7E-5/Putative Ig domain	NA
RHS03175	EJK44038.1/1.26374e-32/hypothetical protein THAOC_37459 [Thalassiosira oceanica]	Q39580/4e-33/DYL1_CHLRE Dynein 8 kDa light chain, flagellar outer arm OS=Chlamydomonas reinhardtii OX=3055 PE=1 SV=1	vcn:VOLCADRAFT_103135/6e-33/flaN; outer dynein arm light chain 8, 8 kD; K10418 dynein light chain LC8-type	Hs18087855/2e-33/[Z] KOG3430 Dynein light chain type 1	A0A0C3FY24/2e-51/A0A0C3FY24_9AGAM Dynein light chain OS=Piloderma croceum F 1598 OX=765440 GN=PILCRDRAFT_819872 PE=3 SV=1	PF01221/1.2E-27/Dynein light chain type 1	biological_process:GO:0010970//transport along microtubule;GO:0060271//cilium assembly;GO:2000582//positive regulation of ATP-dependent microtubule motor activity, plus-end-directed;GO:0007017//microtubule-based process;cellular_component:GO:0030286//dynein complex;GO:0005868//cytoplasmic dynein complex;molecular_function:GO:0051959//dynein light intermediate chain binding;GO:0045505//dynein inte…
RHS03176	XP_005848263.1/4.58321e-92/hypothetical protein CHLNCDRAFT_57611 [Chlorella variabilis] &gt;EFN56161.1 hypothetical protein CHLNCDRAFT_57611 [Chlorella variabilis]	Q5AG71/2e-106/HSL1_CANAL Serine/threonine-protein kinase HSL1 OS=Candida albicans (strain SC5314 / ATCC MYA-2876) OX=237561 GN=HSL1 PE=1 SV=2	thj:104822350/1e-91/SNF1-related protein kinase catalytic subunit alpha KIN10; K07198 5'-AMP-activated protein kinase, catalytic alpha subunit [EC:2.7.11.11]	YDR507c/1e-102/[D] KOG0588 Serine/threonine protein kinase	A0A067TNJ3/0.0/A0A067TNJ3_GALM3 Uncharacterized protein OS=Galerina marginata (strain CBS 339.88) OX=685588 GN=GALMADRAFT_90882 PE=4 SV=1	PF00069/3.0E-68/Protein kinase domain	molecular_function:GO:0004674//protein serine/threonine kinase activity;GO:0005524//ATP binding;
RHS03177	OQR90666.1/2.20409e-80/DNA ligase [Achlya hypogyna]	A8N936/0.0/DNLI4_COPC7 DNA ligase 4 OS=Coprinopsis cinerea (strain Okayama-7 / 130 / ATCC MYA-4618 / FGSC 9003) OX=240176 GN=LIG4 PE=3 SV=2	jcu:105631084/2e-77/DNA ligase 4 isoform X2; K10777 DNA ligase 4 [EC:6.5.1.1]	Hs4504997/3e-107/[L] KOG0966 ATP-dependent DNA ligase IV	A0A2A9NW16/0.0/A0A2A9NW16_9AGAR DNA ligase OS=Amanita thiersii Skay4041 OX=703135 GN=AMATHDRAFT_74590 PE=3 SV=1	PF04679/5.2E-13/ATP dependent DNA ligase C terminal region	NA
RHS03178	CDP06317.1/0/unnamed protein product [Coffea canephora]	Q99NB9/0.0/SF3B1_MOUSE Splicing factor 3B subunit 1 OS=Mus musculus OX=10090 GN=Sf3b1 PE=1 SV=1	thj:104799861/0.0/splicing factor 3B subunit 1 isoform X1; K12828 splicing factor 3B subunit 1	At5g64270/0.0/[A] KOG0213 Splicing factor 3b, subunit 1	A0A0C9Y544/0.0/A0A0C9Y544_9AGAR Unplaced genomic scaffold K443scaffold_5, whole genome shotgun sequence OS=Laccaria amethystina LaAM-08-1 OX=1095629 GN=K443DRAFT_672062 PE=4 SV=1	PF08920/3.8E-25/Splicing factor 3B subunit 1	NA
RHS03179	XP_002966128.1/0/hypothetical protein SELMODRAFT_168054 [Selaginella moellendorffii] &gt;EFJ32155.1 hypothetical protein SELMODRAFT_168054 [Selaginella moellendorffii]	Q99128/0.0/AP1G1_USTMA AP-1 complex subunit gamma-1 OS=Ustilago maydis (strain 521 / FGSC 9021) OX=237631 GN=APL4 PE=3 SV=3	aof:109822792/0.0/AP-1 complex subunit gamma-2-like; K12391 AP-1 complex subunit gamma-1	Hs18104998/0.0/[U] KOG1062 Vesicle coat complex AP-1, gamma subunit	A0A0C3CLD2/0.0/A0A0C3CLD2_HEBCY AP-1 complex subunit gamma OS=Hebeloma cylindrosporum h7 OX=686832 GN=M413DRAFT_432502 PE=3 SV=1	PS50180/40.894/Gamma-adaptin ear (GAE) domain profile.	biological_process:GO:0006886//intracellular protein transport;GO:0016192//vesicle-mediated transport;cellular_component:GO:0005794//Golgi apparatus;GO:0030131//clathrin adaptor complex;molecular_function:GO:0008565//protein transporter activity;
RHS03180	XP_020984456.1/2.28638e-10/vacuolar protein sorting-associated protein 9A isoform X2 [Arachis duranensis]	Q9UJ41/1e-10/RABX5_HUMAN Rab5 GDP/GTP exchange factor OS=Homo sapiens OX=9606 GN=RABGEF1 PE=1 SV=3	aip:107606102/5e-11/vacuolar protein sorting-associated protein 9A isoform X1; K20131 Rab5 GDP/GTP exchange factor	Hs7657496_3/1e-10/[U] KOG2319 Vacuolar assembly/sorting protein VPS9	A0A409XNL7/0.0/A0A409XNL7_PSICY Uncharacterized protein OS=Psilocybe cyanescens OX=93625 GN=CVT25_008523 PE=4 SV=1	PF02204/1.0E-17/Vacuolar sorting protein 9 (VPS9) domain	NA
RHS03181	NA	NA	NA	NA	A0A2A9NXQ9/3e-62/A0A2A9NXQ9_9AGAR Uncharacterized protein OS=Amanita thiersii Skay4041 OX=703135 GN=AMATHDRAFT_1297 PE=4 SV=1	NA	NA
RHS03182	OLP94170.1/2.60462e-32/hypothetical protein AK812_SmicGene23842 [Symbiodinium microadriaticum]	Q9UTN2/1e-35/YII1_SCHPO Uncharacterized protein C139.01c OS=Schizosaccharomyces pombe (strain 972 / ATCC 24843) OX=284812 GN=SPAC139.01c PE=1 SV=2	pxb:103950591/2e-07/exonuclease 1; K10746 exonuclease 1 [EC:3.1.-.-]	ECU02g0390/7e-10/[L] KOG2519 5'-3' exonuclease	A0A369JML8/0.0/A0A369JML8_HYPMA Uncharacterized protein OS=Hypsizygus marmoreus OX=39966 GN=Hypma_008950 PE=4 SV=1	PF12246/1.0E-73/Temperature dependent protein affecting M2 dsRNA replication	NA
RHS03183	NA	NA	NA	NA	A8NAD7/1e-60/A8NAD7_COPC7 Uncharacterized protein OS=Coprinopsis cinerea (strain Okayama-7 / 130 / ATCC MYA-4618 / FGSC 9003) OX=240176 GN=CC1G_05888 PE=4 SV=1	NA	NA
RHS03184	XP_018841848.1/3.49176e-163/PREDICTED: notchless protein homolog [Juglans regia] &gt;XP_018841857.1 PREDICTED: notchless protein homolog [Juglans regia]	P25382/8e-179/NLE1_YEAST Ribosome assembly protein 4 OS=Saccharomyces cerevisiae (strain ATCC 204508 / S288c) OX=559292 GN=RSA4 PE=1 SV=3	jre:109006883/7e-164/notchless protein homolog; K14855 ribosome assembly protein 4	YCR072c/3e-179/[S] KOG0271 Notchless-like WD40 repeat-containing protein	A0A0C3BSY8/0.0/A0A0C3BSY8_HEBCY Uncharacterized protein OS=Hebeloma cylindrosporum h7 OX=686832 GN=M413DRAFT_368809 PE=4 SV=1	PF00400/2.5E-8/WD domain, G-beta repeat	cellular_component:GO:0005730//nucleolus;molecular_function:GO:0016905//myosin heavy chain kinase activity;
RHS03185	GAQ85709.1/1.4358e-12/pirin domain-containing protein [Klebsormidium nitens]	NA	NA	NA	A0A0D2NAQ3/1e-59/A0A0D2NAQ3_9AGAR Uncharacterized protein OS=Hypholoma sublateritium FD-334 SS-4 OX=945553 GN=HYPSUDRAFT_49698 PE=3 SV=1	NA	cellular_component:GO:0016021//integral component of membrane;
RHS03186	XP_002503920.1/1.95814e-15/predicted protein [Micromonas commoda] &gt;ACO65178.1 predicted protein [Micromonas commoda]	NA	peq:110028187/3e-06/pirin-like protein; K06911 uncharacterized protein	NA	A0A0C2XKL6/1e-99/A0A0C2XKL6_HEBCY Uncharacterized protein OS=Hebeloma cylindrosporum h7 OX=686832 GN=M413DRAFT_447810 PE=3 SV=1	PF02678/4.2E-10/Pirin	cellular_component:GO:0016021//integral component of membrane;
RHS03187	EWM24248.1/2.57143e-16/pleckstrin domain-containing protein [Nannochloropsis gaditana]	Q6ZV73/1e-20/FGD6_HUMAN FYVE, RhoGEF and PH domain-containing protein 6 OS=Homo sapiens OX=9606 GN=FGD6 PE=1 SV=2	zma:100284625/9e-08/senescence-associated-like protein; K20523 SH3 domain-containing YSC84-like protein 1	CE01110/2e-12/[R] KOG1729 FYVE finger containing protein	A0A369JTG7/0.0/A0A369JTG7_HYPMA FYVE, RhoGEF and PH domain-containing protein 6 OS=Hypsizygus marmoreus OX=39966 GN=Fgd6 PE=4 SV=1	PS50010/26.695/Dbl homology (DH) domain profile.	biological_process:GO:0035023//regulation of Rho protein signal transduction;GO:0035556//intracellular signal transduction;cellular_component:GO:0005622//intracellular;molecular_function:GO:0005089//Rho guanyl-nucleotide exchange factor activity;
RHS03188	NA	Q4WMJ1/6e-23/GLIN_ASPFU N-methyltransferase gliN OS=Neosartorya fumigata (strain ATCC MYA-4609 / Af293 / CBS 101355 / FGSC A1100) OX=330879 GN=gliN PE=1 SV=1	han:110908410/2e-07/phosphomethylethanolamine N-methyltransferase-like isoform X1; K05929 phosphoethanolamine N-methyltransferase [EC:2.1.1.103]	NA	A0A0C9WUN1/1e-78/A0A0C9WUN1_9AGAR Unplaced genomic scaffold K443scaffold_387, whole genome shotgun sequence OS=Laccaria amethystina LaAM-08-1 OX=1095629 GN=K443DRAFT_440100 PE=4 SV=1	PF13489/7.5E-8/Methyltransferase domain	NA
RHS03189	NA	O13735/1e-17/FAT1_SCHPO Actin-interacting protein 3 homolog OS=Schizosaccharomyces pombe (strain 972 / ATCC 24843) OX=284812 GN=fat1 PE=1 SV=2	NA	NA	A0A2H3B7K2/6e-54/A0A2H3B7K2_9AGAR Uncharacterized protein OS=Armillaria solidipes OX=1076256 GN=ARMSODRAFT_960010 PE=4 SV=1	NA	NA
RHS03190	CEG01633.1/5.03965e-14/GTP-binding protein, ribosome biogenesis, YsxC [Ostreococcus tauri]	Q05473/4e-10/MRX8_YEAST MIOREX complex component 8 OS=Saccharomyces cerevisiae (strain ATCC 204508 / S288c) OX=559292 GN=MRX8 PE=1 SV=1	ota:OT_ostta08g04210/9e-15/GTP-binding protein, ribosome biogenesis, YsxC; K03978 GTP-binding protein	YDR336w/2e-10/[R] KOG2486 Predicted GTPase	A8NAA1/2e-66/A8NAA1_COPC7 Uncharacterized protein OS=Coprinopsis cinerea (strain Okayama-7 / 130 / ATCC MYA-4618 / FGSC 9003) OX=240176 GN=CC1G_08357 PE=4 SV=2	NA	NA
RHS03191	XP_009036527.1/2.1244e-13/hypothetical protein AURANDRAFT_63838 [Aureococcus anophagefferens] &gt;EGB08517.1 hypothetical protein AURANDRAFT_63838 [Aureococcus anophagefferens]	NA	NA	NA	V2X1H7/2e-124/V2X1H7_MONRO Uncharacterized protein OS=Moniliophthora roreri (strain MCA 2997) OX=1381753 GN=Moror_5059 PE=4 SV=1	PF10021/7.3E-16/Uncharacterized protein conserved in bacteria (DUF2263)	cellular_component:GO:0005634//nucleus;
RHS03192	XP_012850952.1/5.03286e-100/PREDICTED: phosphoribosylaminoimidazole-succinocarboxamide synthase [Erythranthe guttata]	Q96VP6/1e-111/PUR7_PICAN Phosphoribosylaminoimidazole-succinocarboxamide synthase OS=Pichia angusta OX=870730 GN=ADE1 PE=3 SV=1	thj:104816870/1e-48/phosphoribosylaminoimidazole-succinocarboxamide synthase, chloroplastic; K01923 phosphoribosylaminoimidazole-succinocarboxamide synthase [EC:6.3.2.6]	YAR015w/5e-104/[F] KOG2835 Phosphoribosylamidoimidazole-succinocarboxamide synthase	A0A369K836/4e-177/A0A369K836_HYPMA Phosphoribosylaminoimidazole-succinocarboxamide synthase OS=Hypsizygus marmoreus OX=39966 GN=ADE1_0 PE=3 SV=1	TIGR00081/1.1E-70/purC: phosphoribosylaminoimidazolesuccinocarboxamide synthase	biological_process:GO:0006164//purine nucleotide biosynthetic process;molecular_function:GO:0004639//phosphoribosylaminoimidazolesuccinocarboxamide synthase activity;
RHS03193	XP_001754127.1/7.87287e-112/predicted protein [Physcomitrella patens] &gt;EDQ81028.1 predicted protein [Physcomitrella patens]	Q9V3D2/9e-118/HEM6_DROME Oxygen-dependent coproporphyrinogen-III oxidase OS=Drosophila melanogaster OX=7227 GN=Coprox PE=2 SV=1	ppp:112275085/1e-112/coproporphyrinogen-III oxidase 1, chloroplastic-like; K00228 coproporphyrinogen III oxidase [EC:1.3.3.3]	7297203/4e-118/[H] KOG1518 Coproporphyrinogen III oxidase CPO/HEM13	A0A409X3C3/0.0/A0A409X3C3_PSICY Uncharacterized protein OS=Psilocybe cyanescens OX=93625 GN=CVT25_010014 PE=4 SV=1	PF01218/1.8E-129/Coproporphyrinogen III oxidase	biological_process:GO:0006779//porphyrin-containing compound biosynthetic process;molecular_function:GO:0004109//coproporphyrinogen oxidase activity;
RHS03194	XP_002297409.1/0/hypothetical protein THAPSDRAFT_bd439, partial [Thalassiosira pseudonana CCMP1335] &gt;EED86279.1 hypothetical protein THAPSDRAFT_bd439, partial [Thalassiosira pseudonana CCMP1335]	P28040/0.0/DPOA_SCHPO DNA polymerase alpha catalytic subunit OS=Schizosaccharomyces pombe (strain 972 / ATCC 24843) OX=284812 GN=pol1 PE=1 SV=1	cpap:110814366/0.0/DNA polymerase alpha catalytic subunit; K02320 DNA polymerase alpha subunit A [EC:2.7.7.7]	SPAC3H5.06c/0.0/[L] KOG0970 DNA polymerase alpha, catalytic subunit	A0A369J4D5/0.0/A0A369J4D5_HYPMA DNA polymerase OS=Hypsizygus marmoreus OX=39966 GN=pol1 PE=3 SV=1	TIGR00592/5.8E-282/pol2: DNA polymerase (pol2)	biological_process:GO:0006272//leading strand elongation;GO:0006260//DNA replication;GO:0006273//lagging strand elongation;GO:0006303//double-strand break repair via nonhomologous end joining;cellular_component:GO:0005634//nucleus;GO:0005658//alpha DNA polymerase:primase complex;molecular_function:GO:0003677//DNA binding;GO:0001882//nucleoside binding;GO:0008408//3'-5' exonuclease activity;GO:000…
RHS03195	GAQ82893.1/5.94722e-40/hypothetical protein KFL_001280130 [Klebsormidium nitens]	NA	NA	NA	A0A0C9WML0/0.0/A0A0C9WML0_9AGAR Unplaced genomic scaffold K443scaffold_505, whole genome shotgun sequence OS=Laccaria amethystina LaAM-08-1 OX=1095629 GN=K443DRAFT_115349 PE=4 SV=1	PF14737/8.7E-14/Domain of unknown function (DUF4470)	NA
RHS03196	NA	Q9UTQ4/5e-12/YL3B_SCHPO Uncharacterized protein C1071.11 OS=Schizosaccharomyces pombe (strain 972 / ATCC 24843) OX=284812 GN=SPAC1071.11 PE=4 SV=1	NA	NA	A0A0C9X0W9/5e-81/A0A0C9X0W9_9AGAR Unplaced genomic scaffold K443scaffold_505, whole genome shotgun sequence OS=Laccaria amethystina LaAM-08-1 OX=1095629 GN=K443DRAFT_686233 PE=4 SV=1	PF01613/4.0E-31/Flavin reductase like domain	NA
RHS03197	KXZ48094.1/1.23484e-75/hypothetical protein GPECTOR_30g189 [Gonium pectorale]	Q4WS70/1e-78/MDRA_ASPFU Major facilitator superfamily multidrug transporter mdrA OS=Neosartorya fumigata (strain ATCC MYA-4609 / Af293 / CBS 101355 / FGSC A1100) OX=330879 GN=mdrA PE=2 SV=1	NA	SPBC409.08/5e-74/[R] KOG0255 Synaptic vesicle transporter SVOP and related transporters (major facilitator superfamily)	A0A409X3D1/0.0/A0A409X3D1_PSICY Uncharacterized protein OS=Psilocybe cyanescens OX=93625 GN=CVT25_010045 PE=4 SV=1	PF07690/3.1E-32/Major Facilitator Superfamily	biological_process:GO:0055085//transmembrane transport;cellular_component:GO:0016021//integral component of membrane;
RHS03198	NA	W6PQG8/1e-08/ABAA_PENRF Conidiophore development regulator abaA OS=Penicillium roqueforti (strain FM164) OX=1365484 GN=abaA PE=2 SV=1	NA	NA	A0A0L6WBJ2/2e-59/A0A0L6WBJ2_9AGAR Uncharacterized protein OS=Termitomyces sp. J132 OX=1306850 GN=J132_03400 PE=4 SV=1	PS51088/20.886/TEA domain profile.	NA
RHS03199	XP_022005245.1/1.02119e-126/COMPASS-like H3K4 histone methylase component WDR5A [Helianthus annuus] &gt;OTF98562.1 putative transducin/WD40 repeat-like superfamily protein [Helianthus annuus]	Q498M4/1e-130/WDR5_RAT WD repeat-containing protein 5 OS=Rattus norvegicus OX=10116 GN=Wdr5 PE=1 SV=1	han:110903764/2e-127/COMPASS-like H3K4 histone methylase component WDR5A; K14963 COMPASS component SWD3	Hs16554627/5e-131/[R] KOG0266 WD40 repeat-containing protein	A0A0D2PAX0/0.0/A0A0D2PAX0_9AGAR Uncharacterized protein OS=Hypholoma sublateritium FD-334 SS-4 OX=945553 GN=HYPSUDRAFT_134311 PE=4 SV=1	PR00320/1.5E-7/G protein beta WD-40 repeat signature	NA
RHS03200	BAJ94018.1/1.67964e-44/predicted protein [Hordeum vulgare subsp. vulgare] &gt;BAJ93410.1 predicted protein [Hordeum vulgare subsp. vulgare]	O43048/3e-169/YH51_SCHPO TBC domain-containing protein C215.01 OS=Schizosaccharomyces pombe (strain 972 / ATCC 24843) OX=284812 GN=SPBC215.01 PE=3 SV=4	ppp:112295625/3e-45/growth hormone-regulated TBC protein 1-like; K20165 TBC1 domain family member 2A	SPBC215.01/8e-170/[R] KOG4347 GTPase-activating protein VRP	A0A369J860/0.0/A0A369J860_HYPMA Uncharacterized protein OS=Hypsizygus marmoreus OX=39966 GN=Hypma_003567 PE=4 SV=1	PS50086/33.918/TBC/rab GAP domain profile.	biological_process:GO:0006886//intracellular protein transport;GO:0090630//activation of GTPase activity;GO:0031338//regulation of vesicle fusion;cellular_component:GO:0012505//endomembrane system;GO:0005622//intracellular;molecular_function:GO:0017137//Rab GTPase binding;GO:0005096//GTPase activator activity;
RHS03201	NA	NA	NA	NA	A0A0C9WSU4/8e-59/A0A0C9WSU4_9AGAR Unplaced genomic scaffold K443scaffold_505, whole genome shotgun sequence OS=Laccaria amethystina LaAM-08-1 OX=1095629 GN=K443DRAFT_135537 PE=4 SV=1	NA	NA
RHS03202	NA	NA	NA	NA	A0A067S9W2/5e-59/A0A067S9W2_GALM3 Uncharacterized protein OS=Galerina marginata (strain CBS 339.88) OX=685588 GN=GALMADRAFT_1072918 PE=4 SV=1	NA	NA
RHS03203	NA	NA	NA	NA	NA	NA	NA
RHS03204	OAO14741.1/1.66444e-159/phosphoribosylaminoimidazolecarboxamide formyltransferase/IMP cyclohydrolase [Blastocystis sp. ATCC 50177/Nand II]	O74928/0.0/PUR9_SCHPO Bifunctional purine biosynthesis protein ade10 OS=Schizosaccharomyces pombe (strain 972 / ATCC 24843) OX=284812 GN=ade10 PE=2 SV=1	gsl:Gasu_22640/3e-67/bifunctional phosphoribosylaminoimidazolecarboxamide formyltransferase / IMP cyclohydrolase; K00602 phosphoribosylaminoimidazolecarboxamide formyltransferase / IMP cyclohydrolase [EC:2.1.2.3 3.5.4.10]	SPCPB16A4.03c/0.0/[F] KOG2555 AICAR transformylase/IMP cyclohydrolase/methylglyoxal synthase	A0A409XD63/0.0/A0A409XD63_PSICY Uncharacterized protein OS=Psilocybe cyanescens OX=93625 GN=CVT25_009459 PE=3 SV=1	PS50850/12.611/Major facilitator superfamily (MFS) profile.	biological_process:GO:0006164//purine nucleotide biosynthetic process;molecular_function:GO:0004643//phosphoribosylaminoimidazolecarboxamide formyltransferase activity;GO:0003937//IMP cyclohydrolase activity;
RHS03205	NA	NA	NA	NA	NA	NA	NA
RHS03206	NA	NA	NA	NA	NA	NA	NA
RHS03207	CCA25316.1/4.43089e-26/conserved hypothetical protein [Albugo laibachii Nc14]	Q10498/8e-38/HGH1_SCHPO Protein HGH1 homolog OS=Schizosaccharomyces pombe (strain 972 / ATCC 24843) OX=284812 GN=hgh1 PE=3 SV=1	NA	SPAC26F1.12c/3e-38/[S] KOG2973 Uncharacterized conserved protein	A0A409Y4D7/2e-158/A0A409Y4D7_9AGAR Uncharacterized protein OS=Gymnopilus dilepis OX=231916 GN=CVT26_013039 PE=4 SV=1	PF04063/2.1E-61/Domain of unknown function (DUF383)	NA
RHS03208	NA	O14174/8e-25/SPT20_SCHPO SAGA complex subunit spt20 OS=Schizosaccharomyces pombe (strain 972 / ATCC 24843) OX=284812 GN=spt20 PE=1 SV=1	NA	SPAC4D7.10c/3e-25/[BK] TWOG0046 Histone acetyltransferase SAGA, subunit SPT20	A0A369JNI6/6e-172/A0A369JNI6_HYPMA SAGA complex subunit spt20 OS=Hypsizygus marmoreus OX=39966 GN=spt20 PE=4 SV=1	PF12090/3.9E-14/Spt20 family	NA
RHS03209	NA	Q59LY1/2e-12/BRG1_CANAL Biofilm regulator 1 OS=Candida albicans (strain SC5314 / ATCC MYA-2876) OX=237561 GN=BRG1 PE=1 SV=2	adu:107464083/1e-08/GATA transcription factor 9; K17895 GATA-binding protein 3	YMR136w/2e-12/[K] KOG1601 GATA-4/5/6 transcription factors	A0A0C9YC26/9e-85/A0A0C9YC26_9AGAR Unplaced genomic scaffold K443scaffold_10, whole genome shotgun sequence OS=Laccaria amethystina LaAM-08-1 OX=1095629 GN=K443DRAFT_128940 PE=4 SV=1	PS50114/13.982/GATA-type zinc finger domain profile.	NA
RHS03210	NA	NA	NA	NA	A0A0C9YIG1/0.0/A0A0C9YIG1_9AGAR Unplaced genomic scaffold K443scaffold_10, whole genome shotgun sequence OS=Laccaria amethystina LaAM-08-1 OX=1095629 GN=K443DRAFT_673110 PE=4 SV=1	NA	NA
RHS03211	XP_005648013.1/0/DEAD-domain-containing protein [Coccomyxa subellipsoidea C-169] &gt;EIE23469.1 DEAD-domain-containing protein [Coccomyxa subellipsoidea C-169]	Q9P6U9/0.0/DED1_NEUCR ATP-dependent RNA helicase ded1 OS=Neurospora crassa (strain ATCC 24698 / 74-OR23-1A / CBS 708.71 / DSM 1257 / FGSC 987) OX=367110 GN=drh-9 PE=3 SV=1	csl:COCSUDRAFT_63003/0.0/DEAD-domain-containing protein; K11594 ATP-dependent RNA helicase DDX3X [EC:3.6.4.13]	SPCC1795.11/0.0/[A] KOG0335 ATP-dependent RNA helicase	A0A0C9Y1U4/0.0/A0A0C9Y1U4_9AGAR Unplaced genomic scaffold K443scaffold_10, whole genome shotgun sequence OS=Laccaria amethystina LaAM-08-1 OX=1095629 GN=K443DRAFT_128942 PE=3 SV=1	PS51192/30.541/Superfamilies 1 and 2 helicase ATP-binding type-1 domain profile.	molecular_function:GO:0005524//ATP binding;GO:0003676//nucleic acid binding;
RHS03212	XP_021277356.1/6.85664e-18/hsp70-Hsp90 organizing protein 3-like [Herrania umbratica] &gt;XP_021277365.1 hsp70-Hsp90 organizing protein 3-like [Herrania umbratica]	O14085/5e-18/SEC72_SCHPO Translocation protein sec72 OS=Schizosaccharomyces pombe (strain 972 / ATCC 24843) OX=284812 GN=sec72 PE=3 SV=1	jcu:105645979/2e-18/hsp70-Hsp90 organizing protein 3; K09553 stress-induced-phosphoprotein 1	At4g12400/1e-17/[O] KOG0548 Molecular co-chaperone STI1	A0A409VWP4/2e-129/A0A409VWP4_9AGAR Uncharacterized protein OS=Panaeolus cyanescens OX=181874 GN=CVT24_000666 PE=4 SV=1	PS50293/8.89/TPR repeat region circular profile.	NA
RHS03213	XP_002964261.1/6.06854e-74/hypothetical protein SELMODRAFT_406061 [Selaginella moellendorffii] &gt;EFJ34594.1 hypothetical protein SELMODRAFT_406061 [Selaginella moellendorffii]	Q5AT15/6e-17/SST_EMENI Serine O-succinyltransferase OS=Emericella nidulans (strain FGSC A4 / ATCC 38163 / CBS 112.46 / NRRL 194 / M139) OX=227321 GN=cysA PE=1 SV=1	mis:MICPUN_55736/3e-10/acetyltransferase-like/FAD linked oxidase; K00102 D-lactate dehydrogenase (cytochrome) [EC:1.1.2.4]	NA	A0A409X3F7/0.0/A0A409X3F7_PSICY Uncharacterized protein OS=Psilocybe cyanescens OX=93625 GN=CVT25_010060 PE=4 SV=1	PF00561/4.0E-12/alpha/beta hydrolase fold	biological_process:GO:0009058//biosynthetic process;cellular_component:GO:0005737//cytoplasm;molecular_function:GO:0016787//hydrolase activity;GO:0016747//transferase activity, transferring acyl groups other than amino-acyl groups;
RHS03214	XP_003591871.1/2.00537e-19/DNL zinc finger protein [Medicago truncatula] &gt;ACJ85944.1 unknown [Medicago truncatula] &gt;AES62122.1 DNL zinc finger protein [Medicago truncatula]	Q09759/2e-21/YA72_SCHPO Uncharacterized protein C24H6.02c OS=Schizosaccharomyces pombe (strain 972 / ATCC 24843) OX=284812 GN=SPAC24H6.02c PE=4 SV=1	mtr:MTR_1g094720/4e-20/DNL zinc finger protein; K17808 mitochondrial protein import protein ZIM17	SPAC24H6.02c/8e-22/[S] KOG3277 Uncharacterized conserved protein	A0A0C2Y4J4/1e-75/A0A0C2Y4J4_HEBCY Uncharacterized protein OS=Hebeloma cylindrosporum h7 OX=686832 GN=M413DRAFT_442745 PE=4 SV=1	PF05180/3.6E-30/DNL zinc finger	biological_process:GO:0006457//protein folding;GO:0050821//protein stabilization;GO:0030150//protein import into mitochondrial matrix;cellular_component:GO:0005739//mitochondrion;molecular_function:GO:0008270//zinc ion binding;GO:0051087//chaperone binding;
RHS03215	OQS02901.1/2.91584e-41/monothiol glutaredoxin-5, mitochondrial precursor [Thraustotheca clavata]	Q9HDW8/9e-50/GLRX5_SCHPO Monothiol glutaredoxin-5 OS=Schizosaccharomyces pombe (strain 972 / ATCC 24843) OX=284812 GN=grx5 PE=1 SV=1	gsl:Gasu_48570/8e-38/monothiol glutaredoxin; K07390 monothiol glutaredoxin	SPAPB2B4.02/4e-50/[O] KOG0911 Glutaredoxin-related protein	A0A409VTA1/2e-82/A0A409VTA1_9AGAR Glutaredoxin OS=Gymnopilus dilepis OX=231916 GN=CVT26_002838 PE=3 SV=1	PS51354/27.155/Glutaredoxin domain profile.	biological_process:GO:0045454//cell redox homeostasis;cellular_component:GO:0005623//cell;molecular_function:GO:0015035//protein disulfide oxidoreductase activity;GO:0009055//electron transfer activity;GO:0046872//metal ion binding;GO:0051537//2 iron, 2 sulfur cluster binding;
RHS03216	XP_002999173.1/3.13213e-60/3-hydroxyacyl-CoA dehydrogenase, putative [Phytophthora infestans T30-4] &gt;EEY69319.1 3-hydroxyacyl-CoA dehydrogenase, putative [Phytophthora infestans T30-4]	O02691/2e-53/HCD2_BOVIN 3-hydroxyacyl-CoA dehydrogenase type-2 OS=Bos taurus OX=9913 GN=HSD17B10 PE=1 SV=3	sita:101777545/8e-21/tropinone reductase homolog At5g06060 isoform X2; K08081 tropinone reductase I [EC:1.1.1.206]	Hs4758504/3e-53/[Q] KOG1199 Short-chain alcohol dehydrogenase/3-hydroxyacyl-CoA dehydrogenase	A8PFW2/2e-156/A8PFW2_COPC7 3-hydroxyacyl-CoA dehydrogenase OS=Coprinopsis cinerea (strain Okayama-7 / 130 / ATCC MYA-4618 / FGSC 9003) OX=240176 GN=CC1G_04873 PE=3 SV=1	PR00080/4.2E-5/Short-chain dehydrogenase/reductase (SDR) superfamily signature	molecular_function:GO:0016491//oxidoreductase activity;
RHS03217	NA	NA	NA	NA	A0A067S9R2/3e-13/A0A067S9R2_GALM3 Uncharacterized protein OS=Galerina marginata (strain CBS 339.88) OX=685588 GN=GALMADRAFT_257878 PE=4 SV=1	PF04828/3.8E-7/Glutathione-dependent formaldehyde-activating enzyme	NA
RHS03218	NA	NA	NA	NA	A8NA49/5e-129/A8NA49_COPC7 Uncharacterized protein OS=Coprinopsis cinerea (strain Okayama-7 / 130 / ATCC MYA-4618 / FGSC 9003) OX=240176 GN=CC1G_12225 PE=4 SV=2	PF08598/1.3E-7/Sds3-like	NA
RHS03219	GAQ83096.1/1.55974e-37/carboxymethylenebutenolidase [Klebsormidium nitens]	P39721/6e-38/AIM2_YEAST Protein AIM2 OS=Saccharomyces cerevisiae (strain ATCC 204508 / S288c) OX=559292 GN=AIM2 PE=1 SV=1	sita:101772259/2e-27/endo-1,3;1,4-beta-D-glucanase; K01061 carboxymethylenebutenolidase [EC:3.1.1.45]	YAL049c/3e-38/[R] KOG3043 Predicted hydrolase related to dienelactone hydrolase	V2XFD1/1e-139/V2XFD1_MONRO Dienelactone hydrolase endo--beta-d-glucanase OS=Moniliophthora roreri (strain MCA 2997) OX=1381753 GN=Moror_4469 PE=4 SV=1	PF01738/4.0E-21/Dienelactone hydrolase family	NA
RHS03220	XP_002980227.1/4.11758e-44/hypothetical protein SELMODRAFT_112295, partial [Selaginella moellendorffii] &gt;EFJ18487.1 hypothetical protein SELMODRAFT_112295, partial [Selaginella moellendorffii]	Q8K3A2/1e-50/TRPT1_MOUSE tRNA 2'-phosphotransferase 1 OS=Mus musculus OX=10090 GN=Trpt1 PE=2 SV=2	dcr:108210228/2e-43/tRNA 2'-phosphotransferase 1; K10669 2'-phosphotransferase [EC:2.7.1.160]	SPAC2C4.12c_1/3e-53/[J] KOG2278 RNA:NAD 2'-phosphotransferase TPT1	K5X656/2e-90/K5X656_AGABU Uncharacterized protein OS=Agaricus bisporus var. burnettii (strain JB137-S8 / ATCC MYA-4627 / FGSC 10392) OX=597362 GN=AGABI1DRAFT_100698 PE=4 SV=1	PF01885/3.6E-60/RNA 2'-phosphotransferase, Tpt1 / KptA family	biological_process:GO:0006388//tRNA splicing, via endonucleolytic cleavage and ligation;molecular_function:GO:0016772//transferase activity, transferring phosphorus-containing groups;
RHS03221	NA	NA	NA	NA	A0A0C9XJ32/1e-125/A0A0C9XJ32_9AGAR Unplaced genomic scaffold K443scaffold_29, whole genome shotgun sequence OS=Laccaria amethystina LaAM-08-1 OX=1095629 GN=K443DRAFT_92048 PE=4 SV=1	PF14474/5.8E-26/RTC4-like domain	NA
RHS03222	NA	NA	NA	NA	A0A369J173/2e-65/A0A369J173_HYPMA Uncharacterized protein OS=Hypsizygus marmoreus OX=39966 GN=Hypma_003632 PE=4 SV=1	NA	NA
RHS03223	NA	Q8CID0/2e-28/CSR2B_MOUSE Cysteine-rich protein 2-binding protein OS=Mus musculus OX=10090 GN=Kat14 PE=1 SV=2	NA	7298460/3e-34/[R] KOG3138 Predicted N-acetyltransferase	A0A0C9Y1S6/6e-137/A0A0C9Y1S6_9AGAR Unplaced genomic scaffold K443scaffold_10, whole genome shotgun sequence OS=Laccaria amethystina LaAM-08-1 OX=1095629 GN=K443DRAFT_128935 PE=4 SV=1	PS51186/15.729/Gcn5-related N-acetyltransferase (GNAT) domain profile.	NA
RHS03224	NA	NA	NA	NA	A0A369J165/1e-154/A0A369J165_HYPMA Uncharacterized protein OS=Hypsizygus marmoreus OX=39966 GN=Hypma_003635 PE=4 SV=1	PF08590/7.4E-8/Domain of unknown function (DUF1771)	NA
RHS03225	NA	NA	NA	NA	A0A369J7W1/8e-09/A0A369J7W1_HYPMA Uncharacterized protein OS=Hypsizygus marmoreus OX=39966 GN=Hypma_003647 PE=4 SV=1	NA	NA
RHS03226	NA	NA	NA	NA	K5XF37/2e-114/K5XF37_AGABU Uncharacterized protein OS=Agaricus bisporus var. burnettii (strain JB137-S8 / ATCC MYA-4627 / FGSC 10392) OX=597362 GN=AGABI1DRAFT_105394 PE=4 SV=1	NA	NA
RHS03227	NA	P40381/1e-13/SWI6_SCHPO Chromatin-associated protein swi6 OS=Schizosaccharomyces pombe (strain 972 / ATCC 24843) OX=284812 GN=swi6 PE=1 SV=1	NA	SPAC824.10c/5e-14/[B] KOG1911 Heterochromatin-associated protein HP1 and related CHROMO domain proteins	A0A0D2PAX8/4e-61/A0A0D2PAX8_9AGAR Uncharacterized protein OS=Hypholoma sublateritium FD-334 SS-4 OX=945553 GN=HYPSUDRAFT_37143 PE=4 SV=1	PF01393/5.3E-6/Chromo shadow domain	NA
RHS03228	XP_002457845.2/2.2702e-40/RNA-binding protein 8A [Sorghum bicolor] &gt;OQU86856.1 hypothetical protein SORBI_3003G165101 [Sorghum bicolor]	B5DGI7/1e-42/RBM8A_SALSA RNA-binding protein 8A OS=Salmo salar OX=8030 GN=rbm8a PE=2 SV=1	sbi:8069545/4e-41/RNA-binding protein 8A; K12876 RNA-binding protein 8A	CE01044/1e-40/[R] KOG0130 RNA-binding protein RBM8/Tsunagi (RRM superfamily)	A0A0C9YID3/2e-92/A0A0C9YID3_9AGAR Unplaced genomic scaffold K443scaffold_10, whole genome shotgun sequence OS=Laccaria amethystina LaAM-08-1 OX=1095629 GN=K443DRAFT_151794 PE=4 SV=1	PF00076/3.6E-14/RNA recognition motif. (a.k.a. RRM, RBD, or RNP domain)	biological_process:GO:0006396//RNA processing;cellular_component:GO:0005634//nucleus;GO:0005737//cytoplasm;molecular_function:GO:0003729//mRNA binding;
RHS03229	OQR87087.1/3.37863e-84/exosome complex exonuclease RRP4 [Achlya hypogyna]	Q09704/3e-104/RRP4_SCHPO Exosome complex component rrp4 OS=Schizosaccharomyces pombe (strain 972 / ATCC 24843) OX=284812 GN=rrp4 PE=3 SV=1	gsl:Gasu_35970/3e-77/exosome complex component RRP4; K03679 exosome complex component RRP4	SPAC2F7.14c/1e-104/[A] KOG3013 Exosomal 3'-5' exoribonuclease complex, subunit Rrp4	A0A0C9X6L7/9e-180/A0A0C9X6L7_9AGAR Unplaced genomic scaffold K443scaffold_10, whole genome shotgun sequence OS=Laccaria amethystina LaAM-08-1 OX=1095629 GN=K443DRAFT_673094 PE=4 SV=1	PF14382/7.1E-15/Exosome complex exonuclease RRP4 N-terminal region	cellular_component:GO:0000178//exosome (RNase complex);molecular_function:GO:0003723//RNA binding;
RHS03230	NA	NA	NA	NA	A0A2A9NTI9/9e-84/A0A2A9NTI9_9AGAR Uncharacterized protein OS=Amanita thiersii Skay4041 OX=703135 GN=AMATHDRAFT_75200 PE=4 SV=1	NA	NA
RHS03231	XP_009036581.1/4.57777e-79/hypothetical protein AURANDRAFT_63942 [Aureococcus anophagefferens] &gt;EGB08578.1 hypothetical protein AURANDRAFT_63942 [Aureococcus anophagefferens]	Q70J59/7e-150/SED2_ASPFU Tripeptidyl-peptidase sed2 OS=Neosartorya fumigata (strain ATCC MYA-4609 / Af293 / CBS 101355 / FGSC A1100) OX=330879 GN=sed2 PE=1 SV=1	gsl:Gasu_62160/3e-24/tripeptidyl-peptidase I; K01279 tripeptidyl-peptidase I [EC:3.4.14.9]	NA	A0A137QK91/0.0/A0A137QK91_9AGAR Tripeptidyl-peptidase sed2 OS=Leucoagaricus sp. SymC.cos OX=1714833 GN=AN958_08307 PE=4 SV=1	PS51695/32.67/Sedolisin domain profile.	cellular_component:GO:0016021//integral component of membrane;molecular_function:GO:0004252//serine-type endopeptidase activity;GO:0046872//metal ion binding;
RHS03232	OAE29992.1/1.49136e-48/hypothetical protein AXG93_669s1440 [Marchantia polymorpha subsp. ruderalis]	O60103/3e-67/DOA10_SCHPO ERAD-associated E3 ubiquitin-protein ligase doa10 OS=Schizosaccharomyces pombe (strain 972 / ATCC 24843) OX=284812 GN=doa10 PE=1 SV=1	gmx:100813205/1e-46/probable E3 ubiquitin ligase SUD1 isoform X2; K10661 E3 ubiquitin-protein ligase MARCH6 [EC:2.3.2.27]	SPBC14F5.07/1e-67/[A] KOG1609 Protein involved in mRNA turnover and stability	A0A0C9Y1P2/0.0/A0A0C9Y1P2_9AGAR Unplaced genomic scaffold K443scaffold_10, whole genome shotgun sequence OS=Laccaria amethystina LaAM-08-1 OX=1095629 GN=K443DRAFT_86321 PE=4 SV=1	NA	NA
RHS03233	KMZ69092.1/2.16103e-52/Histone H4 [Zostera marina]	P62792/2e-67/H4_PHACH Histone H4 OS=Phanerochaete chrysosporium OX=5306 GN=H4.1 PE=3 SV=2	jcu:105628184/4e-53/histone H4; K11254 histone H4	Hs4504301/8e-54/[B] KOG3467 Histone H4	A0A165EMY5/3e-65/A0A165EMY5_9APHY Histone H4 OS=Laetiporus sulphureus 93-53 OX=1314785 GN=LAESUDRAFT_677825 PE=3 SV=1	PF15511/4.3E-7/Centromere kinetochore component CENP-T histone fold	biological_process:GO:0006334//nucleosome assembly;cellular_component:GO:0005634//nucleus;GO:0000786//nucleosome;GO:0000788//nuclear nucleosome;molecular_function:GO:0042393//histone binding;GO:0003677//DNA binding;GO:0046982//protein heterodimerization activity;
RHS03234	BAD90781.1/4.03539e-69/histone 3 [Conocephalum conicum]	Q4PB04/1e-70/H32_USTMA Histone H3.2 OS=Ustilago maydis (strain 521 / FGSC 9021) OX=237631 GN=HHT2 PE=3 SV=3	apro:F751_0084/7e-67/Histone H3.1; K11253 histone H3	SPBPI060/2e-68/[B] KOG1745 Histones H3 and H4	B0DIH1/4e-71/B0DIH1_LACBS Histone H3 OS=Laccaria bicolor (strain S238N-H82 / ATCC MYA-4686) OX=486041 GN=HTR16202 PE=3 SV=1	PR00622/5.5E-60/Histone H3 signature	NA
RHS03235	EWM25025.1/5.81191e-15/hypothetical protein Naga_100049g21 [Nannochloropsis gaditana]	NA	NA	NA	A0A0C3CM37/1e-85/A0A0C3CM37_HEBCY Uncharacterized protein OS=Hebeloma cylindrosporum h7 OX=686832 GN=M413DRAFT_442804 PE=4 SV=1	NA	NA
RHS03236	XP_005833678.1/9.42769e-76/hypothetical protein GUITHDRAFT_40776, partial [Guillardia theta CCMP2712] &gt;EKX46698.1 hypothetical protein GUITHDRAFT_40776, partial [Guillardia theta CCMP2712]	C8V3W5/3e-91/HST1_EMENI NAD-dependent protein deacetylase hst1 OS=Emericella nidulans (strain FGSC A4 / ATCC 38163 / CBS 112.46 / NRRL 194 / M139) OX=227321 GN=AN10449 PE=3 SV=1	cme:CYME_CMT600C/3e-55/NAD-dependent deacetylase sirtuin 1; K11411 NAD-dependent deacetylase sirtuin 1 [EC:3.5.1.-]	7298007/2e-79/[BK] KOG2684 Sirtuin 5 and related class III sirtuins (SIR2 family)	A0A137QKB4/0.0/A0A137QKB4_9AGAR NAD-dependent protein deacetylase hst1 OS=Leucoagaricus sp. SymC.cos OX=1714833 GN=AN958_08304 PE=4 SV=1	PS50305/42.026/Sirtuin catalytic domain profile.	molecular_function:GO:0070403//NAD+ binding;
RHS03237	XP_008891931.1/2.90706e-154/argininosuccinate synthase [Phytophthora parasitica INRA-310] &gt;XP_008916375.1 argininosuccinate synthase [Phytophthora parasitica INRA-310] &gt;ETI49880.1 argininosuccinate synthase [Phytophthora parasitica P1569] &gt;ETK89748.1 argininosuccinate synthase [Phytophthora parasitica] &gt;ETL43158.1 argininosuccinate synthase [Phytophthora parasitica] &gt;ETL96341.1 arg…	P22768/0.0/ASSY_YEAST Argininosuccinate synthase OS=Saccharomyces cerevisiae (strain ATCC 204508 / S288c) OX=559292 GN=ARG1 PE=1 SV=3	gsl:Gasu_30780/3e-148/argininosuccinate synthase; K01940 argininosuccinate synthase [EC:6.3.4.5]	YOL058w/0.0/[E] KOG1706 Argininosuccinate synthase	A0A0C2YUZ2/0.0/A0A0C2YUZ2_HEBCY Uncharacterized protein OS=Hebeloma cylindrosporum h7 OX=686832 GN=M413DRAFT_442800 PE=3 SV=1	TIGR00032/1.4E-150/argG: argininosuccinate synthase	biological_process:GO:0006526//arginine biosynthetic process;molecular_function:GO:0005524//ATP binding;GO:0004055//argininosuccinate synthase activity;
RHS03238	NA	Q9P3U8/7e-07/YJ95_SCHPO Uncharacterized RING finger protein C548.05c OS=Schizosaccharomyces pombe (strain 972 / ATCC 24843) OX=284812 GN=SPCC548.05c PE=4 SV=1	spen:107020773/5e-06/E3 ubiquitin-protein ligase ORTHRUS 2-like; K10638 E3 ubiquitin-protein ligase UHRF1 [EC:2.3.2.27]	SPCC548.05c/3e-07/[O] KOG2177 Predicted E3 ubiquitin ligase	A0A067SAX4/5e-91/A0A067SAX4_GALM3 Uncharacterized protein OS=Galerina marginata (strain CBS 339.88) OX=685588 GN=GALMADRAFT_257564 PE=4 SV=1	PF13923/6.3E-7/Zinc finger, C3HC4 type (RING finger)	NA
RHS03239	BAF45348.1/1.35909e-15/nucleoporin [Lotus japonicus]	Q6DBY0/6e-34/NUP85_DANRE Nuclear pore complex protein Nup85 OS=Danio rerio OX=7955 GN=nup85 PE=2 SV=1	lja:Lj1g3v0318210.1/3e-16/Lj1g3v0318210.1; -; K14304 nuclear pore complex protein Nup85	Hs13376259/1e-30/[YU] KOG2271 Nuclear pore complex component (sc Nup85)	A0A067SDF4/0.0/A0A067SDF4_GALM3 Nuclear pore complex protein Nup85 OS=Galerina marginata (strain CBS 339.88) OX=685588 GN=GALMADRAFT_79171 PE=3 SV=1	PF07575/2.9E-59/Nup85 Nucleoporin	biological_process:GO:0006406//mRNA export from nucleus;GO:0006606//protein import into nucleus;GO:0045893//positive regulation of transcription, DNA-templated;cellular_component:GO:0031080//nuclear pore outer ring;molecular_function:GO:0017056//structural constituent of nuclear pore;
RHS03240	BAJ89451.1/4.3136e-18/predicted protein [Hordeum vulgare subsp. vulgare]	Q80YF9/1e-34/RHG33_MOUSE Rho GTPase-activating protein 33 OS=Mus musculus OX=10090 GN=Arhgap33 PE=1 SV=1	egr:104449879/4e-10/uncharacterized Rho GTPase-activating protein At5g61530; K18470 Rho GTPase-activating protein 1	Hs4757980/1e-30/[T] KOG1453 Chimaerin and related Rho GTPase activating proteins	A0A067SMM3/0.0/A0A067SMM3_GALM3 Uncharacterized protein OS=Galerina marginata (strain CBS 339.88) OX=685588 GN=GALMADRAFT_257554 PE=4 SV=1	PS50238/47.661/Rho GTPase-activating proteins domain profile.	biological_process:GO:0007165//signal transduction;molecular_function:GO:0005096//GTPase activator activity;
RHS03241	NA	NA	NA	NA	A0A409X4J9/1e-125/A0A409X4J9_9AGAR Uncharacterized protein OS=Panaeolus cyanescens OX=181874 GN=CVT24_012829 PE=4 SV=1	PF12937/4.1E-6/F-box-like	NA
RHS03242	KMZ69092.1/2.16103e-52/Histone H4 [Zostera marina]	P62792/2e-67/H4_PHACH Histone H4 OS=Phanerochaete chrysosporium OX=5306 GN=H4.1 PE=3 SV=2	jcu:105628184/4e-53/histone H4; K11254 histone H4	Hs4504301/8e-54/[B] KOG3467 Histone H4	A0A165EMY5/3e-65/A0A165EMY5_9APHY Histone H4 OS=Laetiporus sulphureus 93-53 OX=1314785 GN=LAESUDRAFT_677825 PE=3 SV=1	PF15511/4.3E-7/Centromere kinetochore component CENP-T histone fold	biological_process:GO:0006334//nucleosome assembly;cellular_component:GO:0005634//nucleus;GO:0000786//nucleosome;GO:0000788//nuclear nucleosome;molecular_function:GO:0042393//histone binding;GO:0003677//DNA binding;GO:0046982//protein heterodimerization activity;
RHS03243	BAD90781.1/4.03539e-69/histone 3 [Conocephalum conicum]	Q4PB04/1e-70/H32_USTMA Histone H3.2 OS=Ustilago maydis (strain 521 / FGSC 9021) OX=237631 GN=HHT2 PE=3 SV=3	apro:F751_0084/7e-67/Histone H3.1; K11253 histone H3	SPBPI060/2e-68/[B] KOG1745 Histones H3 and H4	B0DIH1/4e-71/B0DIH1_LACBS Histone H3 OS=Laccaria bicolor (strain S238N-H82 / ATCC MYA-4686) OX=486041 GN=HTR16202 PE=3 SV=1	PR00622/5.5E-60/Histone H3 signature	NA
RHS03244	OWY97935.1/1.31323e-39/Aspartic protease [Phytophthora megakarya]	P18242/7e-43/CATD_MOUSE Cathepsin D OS=Mus musculus OX=10090 GN=Ctsd PE=1 SV=1	han:110936437/4e-29/aspartic proteinase A2-like; K08245 phytepsin [EC:3.4.23.40]	CE21681/5e-42/[O] KOG1339 Aspartyl protease	A0A409Y1C8/0.0/A0A409Y1C8_9AGAR Uncharacterized protein OS=Gymnopilus dilepis OX=231916 GN=CVT26_006201 PE=3 SV=1	PF00026/3.4E-66/Eukaryotic aspartyl protease	NA
RHS03245	XP_002971976.1/8.87395e-24/hypothetical protein SELMODRAFT_441732 [Selaginella moellendorffii] &gt;EFJ26893.1 hypothetical protein SELMODRAFT_441732 [Selaginella moellendorffii]	A8NE23/2e-105/COP3_COPC7 Alpha-muurolene synthase OS=Coprinopsis cinerea (strain Okayama-7 / 130 / ATCC MYA-4618 / FGSC 9003) OX=240176 GN=COP3 PE=1 SV=1	smo:SELMODRAFT_404489/2e-24/hypothetical protein; K21797 phosphatidylinositol 4-phosphatase [EC:3.1.3.-]	NA	A0A369KAJ6/2e-155/A0A369KAJ6_HYPMA Alpha-muurolene synthase OS=Hypsizygus marmoreus OX=39966 GN=COP3_1 PE=4 SV=1	PF03936/9.0E-8/Terpene synthase family, metal binding domain	molecular_function:GO:0000287//magnesium ion binding;GO:0052866//phosphatidylinositol phosphate phosphatase activity;GO:0010333//terpene synthase activity;
RHS03246	NA	NA	NA	NA	NA	NA	NA
RHS03247	EFH57491.1/6.47835e-61/predicted protein [Arabidopsis lyrata subsp. lyrata]	Q9Y7R3/6e-60/CND2_SCHPO Condensin complex subunit 2 OS=Schizosaccharomyces pombe (strain 972 / ATCC 24843) OX=284812 GN=cnd2 PE=1 SV=1	soe:110790992/3e-61/condensin complex subunit 2; K06676 condensin complex subunit 2	SPCC306.03c/3e-60/[BD] KOG2328 Chromosome condensation complex Condensin, subunit H	A0A0C9Y1L1/0.0/A0A0C9Y1L1_9AGAR Condensin complex subunit 2 OS=Laccaria amethystina LaAM-08-1 OX=1095629 GN=K443DRAFT_86356 PE=3 SV=1	PF05786/3.2E-181/Condensin complex subunit 2	NA
RHS03248	NA	NA	NA	NA	A0A067SAR5/2e-69/A0A067SAR5_GALM3 Uncharacterized protein OS=Galerina marginata (strain CBS 339.88) OX=685588 GN=GALMADRAFT_283289 PE=4 SV=1	NA	NA
RHS03249	XP_005538279.1/1.27243e-19/probable platelet activating factor acetylhydrolase [Cyanidioschyzon merolae strain 10D] &gt;BAM82243.1 probable platelet activating factor acetylhydrolase [Cyanidioschyzon merolae strain 10D]	Q60963/3e-19/PAFA_MOUSE Platelet-activating factor acetylhydrolase OS=Mus musculus OX=10090 GN=Pla2g7 PE=2 SV=2	cme:CYME_CMQ394C/2e-20/probable platelet activating factor acetylhydrolase; K01062 platelet-activating factor acetylhydrolase [EC:3.1.1.47]	CE06966/1e-17/[I] KOG3847 Phospholipase A2 (platelet-activating factor acetylhydrolase in humans)	A0A067TL97/6e-153/A0A067TL97_GALM3 Uncharacterized protein OS=Galerina marginata (strain CBS 339.88) OX=685588 GN=GALMADRAFT_133340 PE=4 SV=1	PF03403/1.3E-31/Platelet-activating factor acetylhydrolase, isoform II	biological_process:GO:0016042//lipid catabolic process;molecular_function:GO:0003847//1-alkyl-2-acetylglycerophosphocholine esterase activity;
RHS03250	NA	NA	NA	NA	A0A369JUW8/0.0/A0A369JUW8_HYPMA Beta-glucuronidase OS=Hypsizygus marmoreus OX=39966 GN=Hypma_010015 PE=4 SV=1	PF16862/4.2E-6/Glycosyl hydrolase family 79 C-terminal beta domain	NA
RHS03251	XP_011043609.1/1.57925e-10/PREDICTED: protein-lysine methyltransferase METTL21D [Populus euphratica] &gt;XP_011043610.1 PREDICTED: protein-lysine methyltransferase METTL21D [Populus euphratica] &gt;XP_011043611.1 PREDICTED: protein-lysine methyltransferase METTL21D [Populus euphratica] &gt;XP_011043612.1 PREDICTED: protein-lysine methyltransferase METTL21D [Populus euphratica] &gt;XP_011043613.1 …	P53970/6e-09/EFM6_YEAST Protein-lysine N-methyltransferase EFM6 OS=Saccharomyces cerevisiae (strain ATCC 204508 / S288c) OX=559292 GN=EFM6 PE=1 SV=1	pop:18106814/2e-11/protein-lysine methyltransferase METTL21D; K21806 protein N-lysine methyltransferase METTL21D [EC:2.1.1.-]	YNL024c/3e-09/[A] KOG2793 Putative N2,N2-dimethylguanosine tRNA methyltransferase	A0A369J8T6/3e-142/A0A369J8T6_HYPMA Uncharacterized protein OS=Hypsizygus marmoreus OX=39966 GN=Hypma_003674 PE=4 SV=1	PF10294/1.9E-29/Lysine methyltransferase	molecular_function:GO:0008168//methyltransferase activity;
RHS03252	XP_005650134.1/1.24201e-23/rhomboid-domain-containing protein [Coccomyxa subellipsoidea C-169] &gt;EIE25590.1 rhomboid-domain-containing protein [Coccomyxa subellipsoidea C-169]	Q58EK4/4e-21/PARL_DANRE Presenilins-associated rhomboid-like protein, mitochondrial OS=Danio rerio OX=7955 GN=parl PE=2 SV=1	csl:COCSUDRAFT_61787/2e-24/rhomboid-domain-containing protein; K09650 rhomboid-like protein [EC:3.4.21.105]	7303544/4e-23/[T] KOG2980 Integral membrane protease of the rhomboid family involved in different forms of regulated intramembrane proteolysis	A0A067SAS4/1e-177/A0A067SAS4_GALM3 Uncharacterized protein OS=Galerina marginata (strain CBS 339.88) OX=685588 GN=GALMADRAFT_231645 PE=4 SV=1	PF01694/1.2E-16/Rhomboid family	cellular_component:GO:0016021//integral component of membrane;molecular_function:GO:0004252//serine-type endopeptidase activity;
RHS03253	XP_005643769.1/5.68804e-13/hypothetical protein COCSUDRAFT_38412 [Coccomyxa subellipsoidea C-169] &gt;EIE19225.1 hypothetical protein COCSUDRAFT_38412 [Coccomyxa subellipsoidea C-169]	P87241/4e-16/RIB2_SCHPO Diaminohydroxyphosphoribosylamino-pyrimidine deaminase OS=Schizosaccharomyces pombe (strain 972 / ATCC 24843) OX=284812 GN=rib2 PE=3 SV=1	rcu:8275223/1e-12/protein N-lysine methyltransferase METTL21A isoform X1; K21806 protein N-lysine methyltransferase METTL21D [EC:2.1.1.-]	SPCC4G3.16/2e-16/[F] KOG1018 Cytosine deaminase FCY1 and related enzymes	A0A369J406/1e-125/A0A369J406_HYPMA Diaminohydroxyphosphoribosylamino-pyrimidine deaminase OS=Hypsizygus marmoreus OX=39966 GN=rib2_0 PE=4 SV=1	PF10294/4.0E-21/Lysine methyltransferase	molecular_function:GO:0008168//methyltransferase activity;
RHS03254	NA	NA	NA	NA	A0A0C9YI96/3e-44/A0A0C9YI96_9AGAR Unplaced genomic scaffold K443scaffold_10, whole genome shotgun sequence OS=Laccaria amethystina LaAM-08-1 OX=1095629 GN=K443DRAFT_673051 PE=4 SV=1	NA	NA
RHS03255	XP_005702872.1/0/cycloartenol synthase [Galdieria sulphuraria] &gt;EME26352.1 cycloartenol synthase [Galdieria sulphuraria]	Q96WJ0/0.0/ERG7_PNECA Lanosterol synthase OS=Pneumocystis carinii OX=4754 GN=ERG7 PE=2 SV=1	gsl:Gasu_60260/0.0/cycloartenol synthase; K01853 cycloartenol synthase [EC:5.4.99.8]	Hs4505027/0.0/[I] KOG0497 Oxidosqualene-lanosterol cyclase and related proteins	A0A0C9Y1K8/0.0/A0A0C9Y1K8_9AGAR Terpene cyclase/mutase family member OS=Laccaria amethystina LaAM-08-1 OX=1095629 GN=K443DRAFT_673047 PE=3 SV=1	TIGR01787/2.9E-208/squalene_cyclas: squalene/oxidosqualene cyclases	molecular_function:GO:0016866//intramolecular transferase activity;
RHS03256	GAQ87388.1/2.32457e-21/Actin and related proteins [Klebsormidium nitens]	Q9UTQ7/5e-24/ARP9_SCHPO SWI/SNF and RSC complexes subunit arp9 OS=Schizosaccharomyces pombe (strain 972 / ATCC 24843) OX=284812 GN=arp9 PE=1 SV=1	egr:104444177/4e-14/actin-7; K10355 actin, other eukaryote	SPAC1071.06/2e-24/[Z] KOG0676 Actin and related proteins	B0DID1/0.0/B0DID1_LACBS Actin-related protein OS=Laccaria bicolor (strain S238N-H82 / ATCC MYA-4686) OX=486041 GN=LACBIDRAFT_302812 PE=3 SV=1	PF00022/1.9E-30/Actin	NA
RHS03257	KDD76827.1/6.34884e-47/hypothetical protein H632_c94p4 [Helicosporidium sp. ATCC 50920]	P52808/3e-52/RL30A_SCHPO 60S ribosomal protein L30-1 OS=Schizosaccharomyces pombe (strain 972 / ATCC 24843) OX=284812 GN=rpl3001 PE=3 SV=2	mus:103973798/5e-47/60S ribosomal protein L30; K02908 large subunit ribosomal protein L30e	SPAC9G1.03c/1e-52/[J] KOG2988 60S ribosomal protein L30	A0A0C3B9G1/1e-73/A0A0C3B9G1_9AGAM Uncharacterized protein OS=Piloderma croceum F 1598 OX=765440 GN=PILCRDRAFT_88242 PE=4 SV=1	PF01248/2.1E-21/Ribosomal protein L7Ae/L30e/S12e/Gadd45 family	biological_process:GO:0006412//translation;cellular_component:GO:0005840//ribosome;molecular_function:GO:0003735//structural constituent of ribosome;
RHS03258	XP_011031149.1/0/PREDICTED: DNA polymerase delta catalytic subunit [Populus euphratica] &gt;XP_011031150.1 PREDICTED: DNA polymerase delta catalytic subunit [Populus euphratica]	P30316/0.0/DPOD_SCHPO DNA polymerase delta catalytic subunit OS=Schizosaccharomyces pombe (strain 972 / ATCC 24843) OX=284812 GN=pol3 PE=1 SV=2	pop:7466858/0.0/DNA polymerase delta catalytic subunit isoform X1; K02327 DNA polymerase delta subunit 1 [EC:2.7.7.7]	SPBC336.04/0.0/[L] KOG0969 DNA polymerase delta, catalytic subunit	B0DIC5/0.0/B0DIC5_LACBS DNA polymerase OS=Laccaria bicolor (strain S238N-H82 / ATCC MYA-4686) OX=486041 GN=LACBIDRAFT_251819 PE=3 SV=1	PF03104/9.3E-85/DNA polymerase family B, exonuclease domain	biological_process:GO:0006260//DNA replication;GO:0045004//DNA replication proofreading;GO:0006287//base-excision repair, gap-filling;GO:0006297//nucleotide-excision repair, DNA gap filling;cellular_component:GO:0005634//nucleus;GO:0043625//delta DNA polymerase complex;molecular_function:GO:0003677//DNA binding;GO:0008408//3'-5' exonuclease activity;GO:0003887//DNA-directed DNA polymerase activit…
RHS03259	XP_002447342.1/7.28803e-90/phosphomannomutase [Sorghum bicolor] &gt;EES11670.1 hypothetical protein SORBI_3006G271500 [Sorghum bicolor]	Q9UTJ2/3e-104/PMM_SCHPO Phosphomannomutase OS=Schizosaccharomyces pombe (strain 972 / ATCC 24843) OX=284812 GN=pmm1 PE=2 SV=1	sbi:8085888/1e-90/phosphomannomutase; K17497 phosphomannomutase [EC:5.4.2.8]	SPAC1556.07/1e-104/[I] KOG3189 Phosphomannomutase	A0A067SAV2/7e-129/A0A067SAV2_GALM3 Phosphomannomutase OS=Galerina marginata (strain CBS 339.88) OX=685588 GN=GALMADRAFT_257526 PE=3 SV=1	TIGR01484/9.5E-27/HAD-SF-IIB: HAD hydrolase, family IIB	biological_process:GO:0009298//GDP-mannose biosynthetic process;GO:0006013//mannose metabolic process;GO:0045047//protein targeting to ER;GO:0019853//L-ascorbic acid biosynthetic process;GO:0006487//protein N-linked glycosylation;GO:0009651//response to salt stress;cellular_component:GO:0005737//cytoplasm;GO:0005829//cytosol;molecular_function:GO:0004615//phosphomannomutase activity;
RHS03260	OQR95794.1/1.35633e-43/hypothetical protein THRCLA_07566 [Thraustotheca clavata]	O74977/3e-69/VMS1_SCHPO VMS1 homolog C1827.04 OS=Schizosaccharomyces pombe (strain 972 / ATCC 24843) OX=284812 GN=SPCC1827.04 PE=1 SV=1	cmos:111444816/4e-26/ankyrin repeat and zinc finger domain-containing protein 1-like isoform X1; K08850 aurora kinase, other [EC:2.7.11.1]	SPCC1827.04/1e-69/[R] KOG2505 Ankyrin repeat protein	A0A067SAQ1/0.0/A0A067SAQ1_GALM3 Uncharacterized protein OS=Galerina marginata (strain CBS 339.88) OX=685588 GN=GALMADRAFT_129807 PE=4 SV=1	NA	NA
RHS03261	XP_006837339.1/2.67463e-35/putative uncharacterized protein DDB_G0270496 isoform X1 [Amborella trichopoda] &gt;ERN00193.1 hypothetical protein AMTR_s00111p00088150 [Amborella trichopoda]	Q9US05/1e-40/BFR2_SCHPO Protein bfr2 OS=Schizosaccharomyces pombe (strain 972 / ATCC 24843) OX=284812 GN=bfr2 PE=1 SV=1	ats:109773311/5e-31/LOC109773311; protein AATF-like isoform X1; K14782 protein AATF/BFR2	SPAC664.08c/5e-41/[KU] KOG2773 Apoptosis antagonizing transcription factor/protein transport protein	A0A369JNV2/2e-137/A0A369JNV2_HYPMA Sorting nexin-41 OS=Hypsizygus marmoreus OX=39966 GN=SNX41 PE=4 SV=1	PF08164/3.2E-30/Apoptosis-antagonizing transcription factor, C-terminal	cellular_component:GO:0005634//nucleus;GO:0005730//nucleolus;
RHS03262	OAE25822.1/4.07642e-17/hypothetical protein AXG93_2145s1210 [Marchantia polymorpha subsp. ruderalis]	P0CR64/1e-179/SNX41_CRYNJ Sorting nexin-41 OS=Cryptococcus neoformans var. neoformans serotype D (strain JEC21 / ATCC MYA-565) OX=214684 GN=SNX41 PE=3 SV=1	lang:109336520/4e-12/sorting nexin 1; K17917 sorting nexin-1/2	SPBC14F5.11c/8e-75/[U] KOG2273 Membrane coat complex Retromer, subunit VPS5/SNX1, Sorting nexins, and related PX domain-containing proteins	A0A0C2YV16/0.0/A0A0C2YV16_HEBCY Uncharacterized protein OS=Hebeloma cylindrosporum h7 OX=686832 GN=M413DRAFT_442833 PE=4 SV=1	PS50195/15.346/PX domain profile.	cellular_component:GO:0005737//cytoplasm;molecular_function:GO:0035091//phosphatidylinositol binding;
RHS03263	NA	NA	NA	NA	A0A2H3E896/8e-33/A0A2H3E896_ARMGA P-loop containing nucleoside triphosphate hydrolase protein OS=Armillaria gallica OX=47427 GN=ARMGADRAFT_499709 PE=4 SV=1	NA	NA
RHS03264	XP_009515437.1/3.22522e-07/hypothetical protein PHYSODRAFT_554422 [Phytophthora sojae] &gt;EGZ28162.1 hypothetical protein PHYSODRAFT_554422 [Phytophthora sojae]	Q20144/6e-07/TMTC1_CAEEL Protein O-mannosyl-transferase TMTC1 OS=Caenorhabditis elegans OX=6239 GN=F38B6.6 PE=3 SV=2	mus:103978537/1e-06/probable UDP-N-acetylglucosamine--peptide N-acetylglucosaminyltransferase SEC; K09667 protein O-GlcNAc transferase [EC:2.4.1.255]	CE04519/4e-07/[R] KOG1124 FOG: TPR repeat	A0A0D2KKW5/1e-99/A0A0D2KKW5_9AGAR Uncharacterized protein OS=Hypholoma sublateritium FD-334 SS-4 OX=945553 GN=HYPSUDRAFT_48564 PE=4 SV=1	PS50293/15.897/TPR repeat region circular profile.	NA
RHS03265	XP_017232490.1/8.38883e-21/PREDICTED: mitochondrial import inner membrane translocase subunit TIM23-2 [Daucus carota subsp. sativus] &gt;KZN05780.1 hypothetical protein DCAR_006617 [Daucus carota subsp. sativus]	Q9USM7/2e-69/TIM23_SCHPO Mitochondrial import inner membrane translocase subunit tim23 OS=Schizosaccharomyces pombe (strain 972 / ATCC 24843) OX=284812 GN=tim23 PE=3 SV=1	dcr:108206635/2e-21/mitochondrial import inner membrane translocase subunit TIM23-2; K17794 mitochondrial import inner membrane translocase subunit TIM23	SPCC16A11.09c/1e-69/[U] KOG3324 Mitochondrial import inner membrane translocase, subunit TIM23	V2XVC9/1e-121/V2XVC9_MONRO Mitochondrial import inner membrane translocase subunit OS=Moniliophthora roreri (strain MCA 2997) OX=1381753 GN=Moror_17414 PE=4 SV=1	PF02466/2.1E-27/Tim17/Tim22/Tim23/Pmp24 family	cellular_component:GO:0016021//integral component of membrane;
RHS03266	XP_005537822.1/2.04067e-120/cytochrome c reductase cytochrome c1 subunit [Cyanidioschyzon merolae strain 10D] &gt;BAM81786.1 cytochrome c reductase cytochrome c1 subunit [Cyanidioschyzon merolae strain 10D]	P07143/2e-133/CY1_YEAST Cytochrome c1, heme protein, mitochondrial OS=Saccharomyces cerevisiae (strain ATCC 204508 / S288c) OX=559292 GN=CYT1 PE=1 SV=1	cme:CYME_CMP152C/4e-121/cytochrome c reductase cytochrome c1 subunit; K00413 ubiquinol-cytochrome c reductase cytochrome c1 subunit	YOR065w/1e-133/[C] KOG3052 Cytochrome c1	A0A0L6WHS9/0.0/A0A0L6WHS9_9AGAR Cytochrome c1, heme protein, mitochondrial OS=Termitomyces sp. J132 OX=1306850 GN=J132_04597 PE=4 SV=1	PR00603/7.3E-79/Cytochrome C1 signature	molecular_function:GO:0009055//electron transfer activity;GO:0046872//metal ion binding;GO:0020037//heme binding;
RHS03267	XP_012195924.1/3.59995e-66/hypothetical protein SPRG_01973 [Saprolegnia parasitica CBS 223.65] &gt;KDO33161.1 hypothetical protein SPRG_01973 [Saprolegnia parasitica CBS 223.65]	Q1MTP1/2e-86/THP3_SCHPO THP3 homolog C2A9.11c OS=Schizosaccharomyces pombe (strain 972 / ATCC 24843) OX=284812 GN=SPBC2A9.11c PE=3 SV=1	NA	SPBC2A9.11c/9e-87/[K] KOG1861 Leucine permease transcriptional regulator	A0A0C9X6E4/0.0/A0A0C9X6E4_9AGAR Unplaced genomic scaffold K443scaffold_10, whole genome shotgun sequence OS=Laccaria amethystina LaAM-08-1 OX=1095629 GN=K443DRAFT_673031 PE=4 SV=1	PF03399/1.6E-19/SAC3/GANP family	NA
RHS03268	XP_001762326.1/2.25006e-18/predicted protein [Physcomitrella patens] &gt;EDQ72793.1 predicted protein [Physcomitrella patens]	Q8TFH7/4e-46/SEN2_SCHPO Probable tRNA-splicing endonuclease subunit sen2 OS=Schizosaccharomyces pombe (strain 972 / ATCC 24843) OX=284812 GN=sen2 PE=3 SV=1	apro:F751_0624/7e-19/Transportin-3; K15436 transportin-3	YLR105c/6e-34/[J] KOG4685 tRNA splicing endonuclease SEN2	A0A409YEL2/0.0/A0A409YEL2_9AGAR tRNA-splicing endonuclease subunit Sen2 OS=Gymnopilus dilepis OX=231916 GN=CVT26_015085 PE=3 SV=1	PF01974/2.9E-17/tRNA intron endonuclease, catalytic C-terminal domain	biological_process:GO:0006886//intracellular protein transport;GO:0006388//tRNA splicing, via endonucleolytic cleavage and ligation;GO:0000379//tRNA-type intron splice site recognition and cleavage;cellular_component:GO:0000214//tRNA-intron endonuclease complex;GO:0005634//nucleus;molecular_function:GO:0008536//Ran GTPase binding;GO:0000213//tRNA-intron endonuclease activity;
RHS03269	OLQ10593.1/1.67727e-96/Cytoplasmic dynein 1 intermediate chain 2 [Symbiodinium microadriaticum]	Q29RQ3/2e-149/DC1I1_BOVIN Cytoplasmic dynein 1 intermediate chain 1 OS=Bos taurus OX=9913 GN=DYNC1I1 PE=1 SV=1	mis:MICPUN_83829/4e-29/ODA9, ODA-9; dynein, 78 kDa intermediate chain, flagellar outer arm; K10409 dynein intermediate chain 1, axonemal	Hs4758178/4e-149/[Z] KOG1587 Cytoplasmic dynein intermediate chain	A0A409WMG9/0.0/A0A409WMG9_PSICY Uncharacterized protein OS=Psilocybe cyanescens OX=93625 GN=CVT25_003256 PE=4 SV=1	PF00400/0.14/WD domain, G-beta repeat	NA
RHS03270	OQR88751.1/2.2168e-105/hypothetical protein THRCLA_10124 [Thraustotheca clavata]	P43567/9e-94/AGX1_YEAST Alanine--glyoxylate aminotransferase 1 OS=Saccharomyces cerevisiae (strain ATCC 204508 / S288c) OX=559292 GN=AGX1 PE=1 SV=1	ppp:112290862/1e-49/serine--glyoxylate aminotransferase-like; K00830 alanine-glyoxylate transaminase / serine-glyoxylate transaminase / serine-pyruvate transaminase [EC:2.6.1.44 2.6.1.45 2.6.1.51]	YFL030w/4e-94/[R] KOG2862 Alanine-glyoxylate aminotransferase AGT1	A0A369JTX3/7e-176/A0A369JTX3_HYPMA Alanine--glyoxylate aminotransferase 1 OS=Hypsizygus marmoreus OX=39966 GN=AGX1_0 PE=3 SV=1	PF00266/2.5E-30/Aminotransferase class-V	cellular_component:GO:0016021//integral component of membrane;molecular_function:GO:0003824//catalytic activity;
RHS03271	GAX81461.1/5.09263e-116/hypothetical protein CEUSTIGMA_g8890.t1 [Chlamydomonas eustigma]	P43567/1e-90/AGX1_YEAST Alanine--glyoxylate aminotransferase 1 OS=Saccharomyces cerevisiae (strain ATCC 204508 / S288c) OX=559292 GN=AGX1 PE=1 SV=1	csl:COCSUDRAFT_53254/4e-47/serine glyoxylate aminotransferase; K00830 alanine-glyoxylate transaminase / serine-glyoxylate transaminase / serine-pyruvate transaminase [EC:2.6.1.44 2.6.1.45 2.6.1.51]	YFL030w/6e-91/[R] KOG2862 Alanine-glyoxylate aminotransferase AGT1	A0A0C9XRW4/0.0/A0A0C9XRW4_9AGAR Unplaced genomic scaffold K443scaffold_10, whole genome shotgun sequence OS=Laccaria amethystina LaAM-08-1 OX=1095629 GN=K443DRAFT_673022 PE=3 SV=1	PF00266/9.3E-32/Aminotransferase class-V	cellular_component:GO:0016021//integral component of membrane;molecular_function:GO:0003824//catalytic activity;
RHS03272	OEL31973.1/9.04016e-16/Serine/threonine-protein kinase STY8 [Dichanthelium oligosanthes]	Q2MHE4/2e-11/HT1_ARATH Serine/threonine/tyrosine-protein kinase HT1 OS=Arabidopsis thaliana OX=3702 GN=HT1 PE=1 SV=1	egu:105055153/5e-12/serine/threonine-protein kinase STY46-like isoform X1; K17535 serine/threonine-protein kinase TNNI3K [EC:2.7.11.1]	At1g62400/2e-11/[T] KOG0192 Tyrosine kinase specific for activated (GTP-bound) p21cdc42Hs	A0A067SAT6/3e-50/A0A067SAT6_GALM3 Uncharacterized protein OS=Galerina marginata (strain CBS 339.88) OX=685588 GN=GALMADRAFT_257468 PE=4 SV=1	PF07714/3.2E-7/Protein tyrosine kinase	NA
RHS03273	ONM57244.1/1.23212e-33/ATP binding protein [Zea mays]	F4JTP5/9e-31/STY46_ARATH Serine/threonine-protein kinase STY46 OS=Arabidopsis thaliana OX=3702 GN=STY46 PE=1 SV=1	egu:105055153/2e-33/serine/threonine-protein kinase STY46-like isoform X1; K17535 serine/threonine-protein kinase TNNI3K [EC:2.7.11.1]	At5g57610_2/8e-31/[T] KOG0192 Tyrosine kinase specific for activated (GTP-bound) p21cdc42Hs	A0A067SAT6/2e-119/A0A067SAT6_GALM3 Uncharacterized protein OS=Galerina marginata (strain CBS 339.88) OX=685588 GN=GALMADRAFT_257468 PE=4 SV=1	PF00069/1.2E-32/Protein kinase domain	NA
RHS03274	XP_008903490.1/0/sulfite reductase (NADPH) hemoprotein, beta-component [Phytophthora parasitica INRA-310] &gt;ETK89026.1 sulfite reductase (NADPH) hemoprotein, beta-component [Phytophthora parasitica] &gt;ETL42433.1 sulfite reductase (NADPH) hemoprotein, beta-component [Phytophthora parasitica] &gt;ETL95606.1 sulfite reductase (NADPH) hemoprotein, beta-component [Phytophthora parasitica] &gt;ETN1…	Q1K9C2/0.0/MET5_SCHPO Sulfite reductase [NADPH] subunit beta OS=Schizosaccharomyces pombe (strain 972 / ATCC 24843) OX=284812 GN=sir1 PE=3 SV=1	dzi:111284864/4e-122/sulfite reductase [ferredoxin], chloroplastic-like isoform X1; K00392 sulfite reductase (ferredoxin) [EC:1.8.7.1]	SPAC10F6.01c/0.0/[P] KOG0560 Sulfite reductase (ferredoxin)	A0A0C9X6D3/0.0/A0A0C9X6D3_9AGAR Unplaced genomic scaffold K443scaffold_10, whole genome shotgun sequence (Fragment) OS=Laccaria amethystina LaAM-08-1 OX=1095629 GN=K443DRAFT_673021 PE=3 SV=1	PF03460/1.4E-15/Nitrite/Sulfite reductase ferredoxin-like half domain	biological_process:GO:0019419//sulfate reduction;cellular_component:GO:0009337//sulfite reductase complex (NADPH);molecular_function:GO:0020037//heme binding;GO:0051536//iron-sulfur cluster binding;GO:0010181//FMN binding;GO:0050311//sulfite reductase (ferredoxin) activity;GO:0016491//oxidoreductase activity;GO:0016002//sulfite reductase activity;
RHS03275	XP_005761596.1/2.02694e-18/hypothetical protein EMIHUDRAFT_120752 [Emiliania huxleyi CCMP1516] &gt;EOD09167.1 hypothetical protein EMIHUDRAFT_120752 [Emiliania huxleyi CCMP1516]	NA	mpp:MICPUCDRAFT_46331/3e-09/hypothetical protein; K01259 proline iminopeptidase [EC:3.4.11.5]	NA	A0A0C3NXR1/1e-92/A0A0C3NXR1_PHLGI Uncharacterized protein OS=Phlebiopsis gigantea 11061_1 CR5-6 OX=745531 GN=PHLGIDRAFT_85391 PE=4 SV=1	PR00793/1.2E-11/Prolyl aminopeptidase (S33) family signature	cellular_component:GO:0016021//integral component of membrane;molecular_function:GO:0008233//peptidase activity;
RHS03276	XP_005756339.1/2.4832e-51/hypothetical protein EMIHUDRAFT_466318 [Emiliania huxleyi CCMP1516] &gt;EOD03910.1 hypothetical protein EMIHUDRAFT_466318 [Emiliania huxleyi CCMP1516]	Q6DKE0/2e-27/DHDH_XENLA Trans-1,2-dihydrobenzene-1,2-diol dehydrogenase OS=Xenopus laevis OX=8355 GN=dhdh PE=2 SV=1	cme:CYME_CMR475C/3e-11/probable inositol 2-dehydrogenase; K00010 myo-inositol 2-dehydrogenase / D-chiro-inositol 1-dehydrogenase [EC:1.1.1.18 1.1.1.369]	7295964/5e-29/[GQ] KOG2741 Dimeric dihydrodiol dehydrogenase	A0A369JWD4/0.0/A0A369JWD4_HYPMA D-xylose 1-dehydrogenase (NADP(+)) 2 OS=Hypsizygus marmoreus OX=39966 GN=Hypma_009160 PE=4 SV=1	PF01408/1.5E-20/Oxidoreductase family, NAD-binding Rossmann fold	biological_process:GO:0006281//DNA repair;cellular_component:GO:0030915//Smc5-Smc6 complex;molecular_function:GO:0016491//oxidoreductase activity;
RHS03277	KYP54140.1/2.19096e-10/RNA polymerase II-associated factor 1 isogeny [Cajanus cajan]	Q9US06/2e-22/PAF1_SCHPO RNA polymerase II-associated protein 1 homolog OS=Schizosaccharomyces pombe (strain 972 / ATCC 24843) OX=284812 GN=SPAC664.03 PE=1 SV=2	cit:102610204/8e-13/protein PAF1 homolog isoform X1; K15174 RNA polymerase II-associated factor 1	SPAC664.03/1e-22/[K] KOG2478 Putative RNA polymerase II regulator	B0CU54/0.0/B0CU54_LACBS RNA polymerase II-associated protein OS=Laccaria bicolor (strain S238N-H82 / ATCC MYA-4686) OX=486041 GN=PAFA16201 PE=4 SV=1	PF03985/2.2E-67/Paf1	NA
RHS03278	BAK00460.1/1.16062e-29/predicted protein [Hordeum vulgare subsp. vulgare]	Q751L1/8e-31/RL43_ASHGO 60S ribosomal protein L43 OS=Ashbya gossypii (strain ATCC 10895 / CBS 109.51 / FGSC 9923 / NRRL Y-1056) OX=284811 GN=RPL43 PE=3 SV=1	ppp:112288266/8e-27/60S ribosomal protein L37a-1; K02921 large subunit ribosomal protein L37Ae	YPR043w/6e-30/[J] KOG0402 60S ribosomal protein L37	F8P408/7e-38/F8P408_SERL9 Uncharacterized protein OS=Serpula lacrymans var. lacrymans (strain S7.9) OX=578457 GN=SERLADRAFT_472821 PE=3 SV=1	PF01780/2.6E-26/Ribosomal L37ae protein family	biological_process:GO:0006412//translation;cellular_component:GO:0005840//ribosome;molecular_function:GO:0003735//structural constituent of ribosome;
RHS03279	OWZ09739.1/1.58012e-49/Phosphatidylinositol transporter protein [Phytophthora megakarya]	Q6C9R9/8e-51/SFH5_YARLI Phosphatidylinositol transfer protein SFH5 OS=Yarrowia lipolytica (strain CLIB 122 / E 150) OX=284591 GN=SFH5 PE=3 SV=1	pop:18097762/2e-36/patellin-3; K19996 phosphatidylinositol transfer protein SFH5	At3g51670/3e-33/[I] KOG1471 Phosphatidylinositol transfer protein SEC14 and related proteins	A0A2A9NMT5/3e-141/A0A2A9NMT5_9AGAR Uncharacterized protein OS=Amanita thiersii Skay4041 OX=703135 GN=AMATHDRAFT_58391 PE=4 SV=1	PS50191/17.818/CRAL-TRIO lipid binding domain profile.	NA
RHS03280	GAQ77706.1/5.26098e-26/phosphate/phosphate translocator [Klebsormidium nitens]	P22215/1e-34/SLY41_YEAST Uncharacterized transporter SLY41 OS=Saccharomyces cerevisiae (strain ATCC 204508 / S288c) OX=559292 GN=SLY41 PE=1 SV=2	mus:103979968/7e-26/phosphoenolpyruvate/phosphate translocator 1, chloroplastic-like; K15283 solute carrier family 35, member E1	SPBC83.11/4e-69/[GE] KOG1441 Glucose-6-phosphate/phosphate and phosphoenolpyruvate/phosphate antiporter	A0A0C9XV54/0.0/A0A0C9XV54_9AGAR Unplaced genomic scaffold K443scaffold_5, whole genome shotgun sequence OS=Laccaria amethystina LaAM-08-1 OX=1095629 GN=K443DRAFT_671962 PE=4 SV=1	PF03151/3.9E-45/Triose-phosphate Transporter family	NA
RHS03281	ACG27081.1/6.64586e-127/40S ribosomal protein S4 [Zea mays]	O59950/1e-144/RS4_YARLI 40S ribosomal protein S4 OS=Yarrowia lipolytica (strain CLIB 122 / E 150) OX=284591 GN=RPS4 PE=2 SV=1	csl:COCSUDRAFT_65295/5e-124/ribosomal protein S4 component of cytosolic 80S ribosome and 40S small subunit; K02987 small subunit ribosomal protein S4e	SPBC19F8.08/1e-138/[J] KOG0378 40S ribosomal protein S4	A0A067NFT1/1e-175/A0A067NFT1_PLEOS 40S ribosomal protein S4 OS=Pleurotus ostreatus PC15 OX=1137138 GN=PLEOSDRAFT_1066177 PE=3 SV=1	PS50889/9.829/S4 RNA-binding domain profile.	biological_process:GO:0006412//translation;cellular_component:GO:0005840//ribosome;molecular_function:GO:0003735//structural constituent of ribosome;GO:0019843//rRNA binding;
RHS03282	XP_008661391.1/1.05861e-80/uncharacterized protein LOC100192920 isoform X1 [Zea mays] &gt;AQK43494.1 DNA cross-link repair protein SNM1 [Zea mays]	Q10264/9e-102/PSO2_SCHPO DNA cross-link repair protein pso2/snm1 OS=Schizosaccharomyces pombe (strain 972 / ATCC 24843) OX=284812 GN=pso2 PE=3 SV=3	zma:100192920/2e-81/si683029c11; uncharacterized protein LOC100192920; K15340 DNA cross-link repair 1A protein	SPAC22A12.01c/3e-102/[L] KOG1361 Predicted hydrolase involved in interstrand cross-link repair	A0A369JX40/0.0/A0A369JX40_HYPMA DNA cross-link repair protein pso2/snm1 OS=Hypsizygus marmoreus OX=39966 GN=pso2 PE=4 SV=1	PF07522/9.1E-29/DNA repair metallo-beta-lactamase	biological_process:GO:0006281//DNA repair;GO:0036297//interstrand cross-link repair;GO:0031848//protection from non-homologous end joining at telomere;GO:0006303//double-strand break repair via nonhomologous end joining;cellular_component:GO:0000784//nuclear chromosome, telomeric region;molecular_function:GO:0003684//damaged DNA binding;GO:0035312//5'-3' exodeoxyribonuclease activity;
RHS03283	XP_020886701.1/3.08546e-53/gamma-aminobutyrate transaminase POP2, mitochondrial [Arabidopsis lyrata subsp. lyrata] &gt;EFH59607.1 gamma-aminobutyrate transaminase subunit precursor [Arabidopsis lyrata subsp. lyrata]	A0A098DDI1/2e-99/FUSA3_GIBZE Aminotransferase FGSG_17085 OS=Gibberella zeae (strain PH-1 / ATCC MYA-4620 / FGSC 9075 / NRRL 31084) OX=229533 GN=FGRAMPH1_01T09365 PE=3 SV=1	aly:ARALYDRAFT_479734/6e-54/gamma-aminobutyrate transaminase subunit precursor; K16871 4-aminobutyrate---pyruvate transaminase [EC:2.6.1.96]	SPBC1773.03c/3e-95/[E] KOG1404 Alanine-glyoxylate aminotransferase AGT2	J4GHE9/0.0/J4GHE9_9APHY Uncharacterized protein OS=Fibroporia radiculosa OX=599839 GN=FIBRA_08441 PE=3 SV=1	PF00202/3.9E-60/Aminotransferase class-III	NA
RHS03284	XP_021860892.1/0/E3 ubiquitin-protein ligase UPL3 [Spinacia oleracea] &gt;XP_021860893.1 E3 ubiquitin-protein ligase UPL3 [Spinacia oleracea] &gt;KNA15559.1 hypothetical protein SOVF_097120 [Spinacia oleracea]	P33202/9e-123/UFD4_YEAST Ubiquitin fusion degradation protein 4 OS=Saccharomyces cerevisiae (strain ATCC 204508 / S288c) OX=559292 GN=UFD4 PE=1 SV=1	pda:103706183/0.0/E3 ubiquitin-protein ligase UPL3-like; K10590 E3 ubiquitin-protein ligase TRIP12 [EC:2.3.2.26]	YKL010c_2/9e-132/[O] KOG0170 E3 ubiquitin protein ligase	A0A0C9XV58/0.0/A0A0C9XV58_9AGAR Unplaced genomic scaffold K443scaffold_5, whole genome shotgun sequence OS=Laccaria amethystina LaAM-08-1 OX=1095629 GN=K443DRAFT_496518 PE=4 SV=1	PF03660/8.5E-15/PHF5-like protein	biological_process:GO:0010091//trichome branching;GO:0042023//DNA endoreduplication;cellular_component:GO:0005886//plasma membrane;molecular_function:GO:0004842//ubiquitin-protein transferase activity;
RHS03285	NA	Q14596/3e-06/NBR1_HUMAN Next to BRCA1 gene 1 protein OS=Homo sapiens OX=9606 GN=NBR1 PE=1 SV=3	NA	Hs14110375_1/1e-06/[R] KOG4582 Uncharacterized conserved protein, contains ZZ-type Zn-finger	A0A0C9YLK1/0.0/A0A0C9YLK1_9AGAR Unplaced genomic scaffold K443scaffold_5, whole genome shotgun sequence OS=Laccaria amethystina LaAM-08-1 OX=1095629 GN=K443DRAFT_671967 PE=4 SV=1	PS50135/10.599/Zinc finger ZZ-type profile.	NA
RHS03286	ETM47089.1/5.81799e-103/hypothetical protein L914_08135 [Phytophthora parasitica] &gt;ETO76080.1 hypothetical protein F444_08472 [Phytophthora parasitica P1976]	Q00614/4e-90/CACP_CANTR Carnitine O-acetyltransferase, mitochondrial OS=Candida tropicalis OX=5482 GN=CAT2 PE=3 SV=1	ppp:112285140/3e-61/ribosome production factor 1-like; K14846 ribosome production factor 1	SPAC4F8.04/3e-78/[A] KOG2780 Ribosome biogenesis protein RPF1, contains IMP4 domain	A0A067TBU6/0.0/A0A067TBU6_GALM3 Uncharacterized protein OS=Galerina marginata (strain CBS 339.88) OX=685588 GN=GALMADRAFT_240964 PE=3 SV=1	PS50833/40.552/Brix domain profile.	NA
RHS03287	CBJ29213.1/3.63758e-39/conserved unknown protein [Ectocarpus siliculosus]	P0DPD7/7e-36/EFMT4_HUMAN EEF1A lysine methyltransferase 4 OS=Homo sapiens OX=9606 GN=EEF1AKMT4 PE=1 SV=1	sita:101782663/4e-34/methyltransferase-like protein 13; K22857 EEF1A lysine methyltransferase 4 [EC:2.1.1.-]	CE27144/3e-08/[R] KOG1271 Methyltransferases	A0A409W1D4/2e-79/A0A409W1D4_9AGAR Uncharacterized protein OS=Gymnopilus dilepis OX=231916 GN=CVT26_007274 PE=4 SV=1	PF13649/8.8E-12/Methyltransferase domain	molecular_function:GO:0008168//methyltransferase activity;
RHS03288	OLP98878.1/8.4299e-13/hypothetical protein AK812_SmicGene18620 [Symbiodinium microadriaticum]	NA	crb:17890852/3e-06/probable inactive receptor-like kinase SSP; K14500 BR-signaling kinase [EC:2.7.11.1]	NA	A0A067P7B6/0.0/A0A067P7B6_9AGAM Uncharacterized protein OS=Jaapia argillacea MUCL 33604 OX=933084 GN=JAAARDRAFT_142971 PE=4 SV=1	NA	NA
RHS03289	NA	NA	NA	NA	A0A067P7B6/0.0/A0A067P7B6_9AGAM Uncharacterized protein OS=Jaapia argillacea MUCL 33604 OX=933084 GN=JAAARDRAFT_142971 PE=4 SV=1	NA	NA
RHS03290	XP_009351415.1/1.42405e-65/PREDICTED: FAD-linked sulfhydryl oxidase ALR-like [Pyrus x bretschneideri]	P56213/6e-45/ALR_MOUSE FAD-linked sulfhydryl oxidase ALR OS=Mus musculus OX=10090 GN=Gfer PE=1 SV=2	pxb:103942941/3e-66/FAD-linked sulfhydryl oxidase ALR-like; K17783 mitochondrial FAD-linked sulfhydryl oxidase [EC:1.8.3.2]	7293646/1e-41/[O] KOG3355 Mitochondrial sulfhydryl oxidase involved in the biogenesis of cytosolic Fe/S proteins	A0A409V8K1/2e-78/A0A409V8K1_9AGAR Sulfhydryl oxidase OS=Panaeolus cyanescens OX=181874 GN=CVT24_006280 PE=4 SV=1	PS51324/31.209/ERV/ALR sulfhydryl oxidase domain profile.	cellular_component:GO:0005739//mitochondrion;molecular_function:GO:0015035//protein disulfide oxidoreductase activity;GO:0016971//flavin-linked sulfhydryl oxidase activity;GO:0050660//flavin adenine dinucleotide binding;GO:0016972//thiol oxidase activity;
RHS03291	OWM81552.1/4.65992e-48/hypothetical protein CDL15_Pgr007590 [Punica granatum]	O94639/5e-72/ZRT1_SCHPO Zinc-regulated transporter 1 OS=Schizosaccharomyces pombe (strain 972 / ATCC 24843) OX=284812 GN=zrt1 PE=1 SV=1	pda:103714362/2e-48/LOW QUALITY PROTEIN: zinc transporter 5-like; K14709 solute carrier family 39 (zinc transporter), member 1/2/3	SPBC16D10.06/2e-72/[P] KOG1558 Fe2+/Zn2+ regulated transporter	A0A2H3BNS2/0.0/A0A2H3BNS2_9AGAR ZIP zinc/iron transport family OS=Armillaria solidipes OX=1076256 GN=ARMSODRAFT_954241 PE=3 SV=1	PF02535/2.9E-60/ZIP Zinc transporter	NA
RHS03292	NA	NA	NA	NA	A0A409XL24/6e-65/A0A409XL24_PSICY Uncharacterized protein OS=Psilocybe cyanescens OX=93625 GN=CVT25_013752 PE=3 SV=1	NA	NA
RHS03293	OAE32636.1/1.57525e-135/hypothetical protein AXG93_3569s1110 [Marchantia polymorpha subsp. ruderalis]	Q0CY48/0.0/DBP9_ASPTN ATP-dependent RNA helicase dbp9 OS=Aspergillus terreus (strain NIH 2624 / FGSC A1156) OX=341663 GN=dbp9 PE=3 SV=2	ppp:112278327/3e-131/DEAD-box ATP-dependent RNA helicase 16-like; K14810 ATP-dependent RNA helicase DDX56/DBP9 [EC:3.6.4.13]	YLR276c/0.0/[A] KOG0346 RNA helicase	A0A409VAL8/0.0/A0A409VAL8_9AGAR Uncharacterized protein OS=Panaeolus cyanescens OX=181874 GN=CVT24_006277 PE=4 SV=1	PS51195/7.531/DEAD-box RNA helicase Q motif profile.	molecular_function:GO:0005524//ATP binding;GO:0003676//nucleic acid binding;
RHS03294	KUF90002.1/2.06028e-42/hypothetical protein AM588_10002529 [Phytophthora nicotianae]	A6SSW9/5e-25/BOA17_BOTFB Oxidoreductase BOA17 OS=Botryotinia fuckeliana (strain B05.10) OX=332648 GN=BOA17 PE=2 SV=1	fve:101296562/1e-14/11-beta-hydroxysteroid dehydrogenase 1B-like; K22418 11beta/17beta-hydroxysteroid dehydrogenase [EC:1.1.1.146 1.1.1.-]	CE21092/5e-15/[R] KOG0725 Reductases with broad range of substrate specificities	A0A0C9XNL7/2e-106/A0A0C9XNL7_9AGAR Unplaced genomic scaffold K443scaffold_118, whole genome shotgun sequence OS=Laccaria amethystina LaAM-08-1 OX=1095629 GN=K443DRAFT_680197 PE=3 SV=1	PF00106/7.3E-26/short chain dehydrogenase	molecular_function:GO:0016491//oxidoreductase activity;
RHS03295	OIW11978.1/1.75546e-128/hypothetical protein TanjilG_02185 [Lupinus angustifolius]	Q14410/4e-127/GLPK2_HUMAN Glycerol kinase 2 OS=Homo sapiens OX=9606 GN=GK2 PE=2 SV=2	lang:109347760/6e-129/glycerol kinase-like; K00864 glycerol kinase [EC:2.7.1.30]	Hs15082263/2e-127/[G] KOG2517 Ribulose kinase and related carbohydrate kinases	A0A409YBZ1/0.0/A0A409YBZ1_9AGAR alpha-1,2-Mannosidase OS=Gymnopilus dilepis OX=231916 GN=CVT26_009896 PE=3 SV=1	PF01532/7.4E-113/Glycosyl hydrolase family 47	biological_process:GO:0006072//glycerol-3-phosphate metabolic process;GO:0005975//carbohydrate metabolic process;molecular_function:GO:0004370//glycerol kinase activity;
RHS03296	NA	NA	NA	NA	A0A067N2B8/1e-07/A0A067N2B8_9AGAM Uncharacterized protein OS=Botryobasidium botryosum FD-172 SS1 OX=930990 GN=BOTBODRAFT_171595 PE=4 SV=1	PF05730/1.1E-6/CFEM domain	NA
RHS03297	XP_013608097.1/1.36865e-19/PREDICTED: putative clathrin assembly protein At4g25940 [Brassica oleracea var. oleracea]	O60167/4e-51/YHC3_SCHPO ENTH domain-containing protein C19F8.03c OS=Schizosaccharomyces pombe (strain 972 / ATCC 24843) OX=284812 GN=SPBC19F8.03c PE=1 SV=1	cre:CHLREDRAFT_191396/8e-12/clathrin assembly factor-like protein; K20043 clathrin coat assembly protein AP180	SPBC19F8.03c/2e-51/[TU] KOG0251 Clathrin assembly protein AP180 and related proteins, contain ENTH domain	A0A0C9XV72/0.0/A0A0C9XV72_9AGAR Unplaced genomic scaffold K443scaffold_5, whole genome shotgun sequence OS=Laccaria amethystina LaAM-08-1 OX=1095629 GN=K443DRAFT_127916 PE=4 SV=1	PF07651/2.7E-44/ANTH domain	biological_process:GO:0048268//clathrin coat assembly;GO:0006897//endocytosis;cellular_component:GO:0005794//Golgi apparatus;GO:0030136//clathrin-coated vesicle;GO:0005905//clathrin-coated pit;molecular_function:GO:0030276//clathrin binding;GO:0005545//1-phosphatidylinositol binding;
RHS03298	XP_022158694.1/2.16054e-22/NASP-related protein sim3 [Momordica charantia]	Q9USQ4/3e-33/SIM3_SCHPO NASP-related protein sim3 OS=Schizosaccharomyces pombe (strain 972 / ATCC 24843) OX=284812 GN=sim3 PE=1 SV=1	gab:108479194/3e-21/protein NASP homolog; K11372 HAT1-interacting factor 1	SPBC577.15c/1e-33/[BD] KOG4563 Cell cycle-regulated histone H1-binding protein	A0A369JVN9/8e-151/A0A369JVN9_HYPMA NASP-related protein sim3 OS=Hypsizygus marmoreus OX=39966 GN=sim3 PE=4 SV=1	PS50005/6.313/TPR repeat profile.	NA
RHS03299	NA	NA	NA	NA	A0A3D8Q8W1/1e-36/A0A3D8Q8W1_9HELO Uncharacterized protein OS=Coleophoma crateriformis OX=565419 GN=BP5796_12202 PE=4 SV=1	NA	NA
RHS03300	NA	NA	NA	NA	A0A0C9XA14/7e-35/A0A0C9XA14_9AGAR Unplaced genomic scaffold K443scaffold_137, whole genome shotgun sequence OS=Laccaria amethystina LaAM-08-1 OX=1095629 GN=K443DRAFT_680881 PE=4 SV=1	NA	NA
RHS03301	BAJ92400.1/0/predicted protein [Hordeum vulgare subsp. vulgare]	P37211/0.0/ATPA_NEUCR ATP synthase subunit alpha, mitochondrial OS=Neurospora crassa (strain ATCC 24698 / 74-OR23-1A / CBS 708.71 / DSM 1257 / FGSC 987) OX=367110 GN=atp-1 PE=3 SV=1	ota:OstapMp17/0.0/Atp1; Atp1; K02132 F-type H+-transporting ATPase subunit alpha	YBL099w/0.0/[C] KOG1353 F0F1-type ATP synthase, alpha subunit	A0A409YBY8/0.0/A0A409YBY8_9AGAR Uncharacterized protein OS=Gymnopilus dilepis OX=231916 GN=CVT26_009893 PE=3 SV=1	TIGR00962/1.1E-234/atpA: ATP synthase F1, alpha subunit	biological_process:GO:0015986//ATP synthesis coupled proton transport;cellular_component:GO:0045261//proton-transporting ATP synthase complex, catalytic core F(1);GO:0005739//mitochondrion;molecular_function:GO:0005524//ATP binding;GO:0046933//proton-transporting ATP synthase activity, rotational mechanism;
RHS03302	XP_002325555.1/3.64417e-14/50S ribosomal protein L21 [Populus trichocarpa] &gt;EEE99936.1 50S ribosomal protein L21 [Populus trichocarpa]	Q9P7D4/6e-20/ACON2_SCHPO Homocitrate dehydratase, mitochondrial OS=Schizosaccharomyces pombe (strain 972 / ATCC 24843) OX=284812 GN=SPBP4H10.15 PE=3 SV=3	pop:7467422/9e-15/50S ribosomal protein L21, chloroplastic; K02888 large subunit ribosomal protein L21	SPBP4H10.15/9e-20/[CE] KOG0453 Aconitase/homoaconitase (aconitase superfamily)	A0A369JQ05/6e-85/A0A369JQ05_HYPMA Homocitrate dehydratase, mitochondrial OS=Hypsizygus marmoreus OX=39966 GN=Hypma_009181 PE=3 SV=1	PF00829/1.1E-26/Ribosomal prokaryotic L21 protein	biological_process:GO:0006412//translation;cellular_component:GO:0005840//ribosome;molecular_function:GO:0003723//RNA binding;GO:0003735//structural constituent of ribosome;
RHS03303	KZV54521.1/3.52161e-58/pre-mRNA-processing protein 40A-like [Dorcoceras hygrometricum]	O14176/6e-86/PRP40_SCHPO Pre-mRNA-processing protein prp40 OS=Schizosaccharomyces pombe (strain 972 / ATCC 24843) OX=284812 GN=prp40 PE=1 SV=1	aof:109851303/8e-58/pre-mRNA-processing protein 40A isoform X1; K12821 pre-mRNA-processing factor 40	SPAC4D7.13/3e-86/[A] KOG0152 Spliceosomal protein FBP11/Splicing factor PRP40	A0A0C9XV69/0.0/A0A0C9XV69_9AGAR Unplaced genomic scaffold K443scaffold_5, whole genome shotgun sequence OS=Laccaria amethystina LaAM-08-1 OX=1095629 GN=K443DRAFT_671977 PE=4 SV=1	PS51676/10.123/FF domain profile.	NA
RHS03304	NA	NA	NA	NA	A0A369JW87/2e-155/A0A369JW87_HYPMA Uncharacterized protein OS=Hypsizygus marmoreus OX=39966 GN=Hypma_009179 PE=4 SV=1	NA	NA
RHS03305	GAQ92653.1/1.95337e-33/hypothetical protein KFL_010850010 [Klebsormidium nitens]	Q0V9L1/2e-82/MMS19_XENTR MMS19 nucleotide excision repair protein homolog OS=Xenopus tropicalis OX=8364 GN=mms19 PE=2 SV=2	ppp:112287063/6e-46/MMS19 nucleotide excision repair protein homolog isoform X1; K15075 DNA repair/transcription protein MET18/MMS19	Hs13375626/2e-73/[LK] KOG1967 DNA repair/transcription protein Mms19	A0A0C9Y4P0/0.0/A0A0C9Y4P0_9AGAR Unplaced genomic scaffold K443scaffold_5, whole genome shotgun sequence OS=Laccaria amethystina LaAM-08-1 OX=1095629 GN=K443DRAFT_671974 PE=4 SV=1	PF14500/2.3E-88/Dos2-interacting transcription regulator of RNA-Pol-II	NA
RHS03306	XP_021896943.1/3.33582e-45/uncharacterized protein LOC110813960 isoform X1 [Carica papaya]	O14138/3e-22/NDUF7_SCHPO Protein arginine methyltransferase NDUFAF7 homolog, mitochondrial OS=Schizosaccharomyces pombe (strain 972 / ATCC 24843) OX=284812 GN=SPAC25A8.03c PE=3 SV=2	NA	NA	A0A0C9YLL2/0.0/A0A0C9YLL2_9AGAR Protein arginine methyltransferase NDUFAF7 OS=Laccaria amethystina LaAM-08-1 OX=1095629 GN=K443DRAFT_1114 PE=3 SV=1	PF02636/6.0E-36/Putative S-adenosyl-L-methionine-dependent methyltransferase	cellular_component:GO:0005739//mitochondrion;molecular_function:GO:0008168//methyltransferase activity;
RHS03307	CCI42054.1/2.17594e-95/unnamed protein product [Albugo candida]	A8N8S3/0.0/GATA_COPC7 Glutamyl-tRNA(Gln) amidotransferase subunit A, mitochondrial OS=Coprinopsis cinerea (strain Okayama-7 / 130 / ATCC MYA-4618 / FGSC 9003) OX=240176 GN=CC1G_00798 PE=3 SV=1	sind:105176836/2e-88/glutamyl-tRNA(Gln) amidotransferase subunit A, chloroplastic/mitochondrial; K02433 aspartyl-tRNA(Asn)/glutamyl-tRNA(Gln) amidotransferase subunit A [EC:6.3.5.6 6.3.5.7]	YMR293c/2e-102/[J] KOG1211 Amidases	A0A0C9WXV9/0.0/A0A0C9WXV9_9AGAR Glutamyl-tRNA(Gln) amidotransferase subunit A, mitochondrial OS=Laccaria amethystina LaAM-08-1 OX=1095629 GN=K443DRAFT_675836 PE=3 SV=1	PF01425/4.6E-108/Amidase	biological_process:GO:0032543//mitochondrial translation;GO:0006412//translation;GO:0070681//glutaminyl-tRNAGln biosynthesis via transamidation;cellular_component:GO:0030956//glutamyl-tRNA(Gln) amidotransferase complex;GO:0005739//mitochondrion;molecular_function:GO:0005524//ATP binding;GO:0050567//glutaminyl-tRNA synthase (glutamine-hydrolyzing) activity;GO:0004040//amidase activity;GO:0016740//…
RHS03308	XP_008617450.1/6.70409e-12/hypothetical protein SDRG_13146 [Saprolegnia diclina VS20] &gt;EQC29115.1 hypothetical protein SDRG_13146 [Saprolegnia diclina VS20]	Q0CBM7/7e-31/FAEA_ASPTN Probable feruloyl esterase A OS=Aspergillus terreus (strain NIH 2624 / FGSC A1156) OX=341663 GN=faeA PE=3 SV=1	bna:106454563/9e-08/phospholipase A(1) DAD1, chloroplastic; K16818 phospholipase A1 [EC:3.1.1.32]	YJR107w/3e-12/[I] KOG4569 Predicted lipase	A0A369J8S8/1e-93/A0A369J8S8_HYPMA Uncharacterized protein OS=Hypsizygus marmoreus OX=39966 GN=Hypma_000195 PE=4 SV=1	PF01764/1.2E-22/Lipase (class 3)	biological_process:GO:0006629//lipid metabolic process;cellular_component:GO:0016021//integral component of membrane;molecular_function:GO:0016787//hydrolase activity;
RHS03309	NA	NA	NA	NA	NA	NA	NA
RHS03310	NA	Q0CBM7/8e-11/FAEA_ASPTN Probable feruloyl esterase A OS=Aspergillus terreus (strain NIH 2624 / FGSC A1156) OX=341663 GN=faeA PE=3 SV=1	NA	NA	A0A2A9NRH2/1e-50/A0A2A9NRH2_9AGAR Uncharacterized protein OS=Amanita thiersii Skay4041 OX=703135 GN=AMATHDRAFT_75703 PE=4 SV=1	NA	NA
RHS03311	OIW08218.1/1.41631e-18/hypothetical protein TanjilG_15179 [Lupinus angustifolius]	Q86K32/1e-19/UBE2N_DICDI Probable ubiquitin-conjugating enzyme E2 N OS=Dictyostelium discoideum OX=44689 GN=ube2n PE=3 SV=2	ppp:112287123/4e-19/ubiquitin-conjugating enzyme E2 36 isoform X1; K10580 ubiquitin-conjugating enzyme E2 N [EC:2.3.2.23]	At1g16890/1e-19/[O] KOG0417 Ubiquitin-protein ligase	A0A0C2WSK9/1e-25/A0A0C2WSK9_AMAMU Uncharacterized protein OS=Amanita muscaria Koide BX008 OX=946122 GN=M378DRAFT_187910 PE=3 SV=1	PF00179/5.6E-8/Ubiquitin-conjugating enzyme	biological_process:GO:0070534//protein K63-linked ubiquitination;GO:0006301//postreplication repair;cellular_component:GO:0005634//nucleus;GO:0005737//cytoplasm;molecular_function:GO:0061630//ubiquitin protein ligase activity;GO:0005524//ATP binding;GO:0031625//ubiquitin protein ligase binding;
RHS03312	NA	NA	NA	NA	A0A369JVK1/5e-49/A0A369JVK1_HYPMA Uncharacterized protein OS=Hypsizygus marmoreus OX=39966 GN=Hypma_009080 PE=4 SV=1	NA	NA
RHS03313	NA	NA	NA	NA	A0A0C9YM08/1e-87/A0A0C9YM08_9AGAR Unplaced genomic scaffold K443scaffold_5, whole genome shotgun sequence OS=Laccaria amethystina LaAM-08-1 OX=1095629 GN=K443DRAFT_127993 PE=4 SV=1	NA	NA
RHS03314	OMO88316.1/4.63012e-48/Ubiquinone biosynthesis monooxygenase, COQ6-type [Corchorus olitorius]	Q6DF46/1e-75/COQ6_XENTR Ubiquinone biosynthesis monooxygenase COQ6, mitochondrial OS=Xenopus tropicalis OX=8364 GN=coq6 PE=2 SV=1	thj:104821613/3e-48/ubiquinone biosynthesis monooxygenase COQ6, mitochondrial isoform X1; K06126 ubiquinone biosynthesis monooxygenase Coq6 [EC:1.14.13.-]	SPBC146.12/4e-75/[HC] KOG3855 Monooxygenase involved in coenzyme Q (ubiquinone) biosynthesis	A0A369JSQ8/0.0/A0A369JSQ8_HYPMA Ubiquinone biosynthesis monooxygenase COQ6, mitochondrial OS=Hypsizygus marmoreus OX=39966 GN=coq6 PE=3 SV=1	PF01494/1.9E-12/FAD binding domain	NA
RHS03315	XP_019175324.1/1.23966e-33/PREDICTED: exocyst complex component SEC6 isoform X1 [Ipomoea nil]	O74846/1e-91/SEC6_SCHPO Exocyst complex component sec6 OS=Schizosaccharomyces pombe (strain 972 / ATCC 24843) OX=284812 GN=sec6 PE=1 SV=2	ini:109170595/2e-34/exocyst complex component SEC6; K06110 exocyst complex component 3	SPCC1235.10c/6e-91/[U] KOG2286 Exocyst complex subunit SEC6	A0A409XJ16/0.0/A0A409XJ16_PSICY Uncharacterized protein OS=Psilocybe cyanescens OX=93625 GN=CVT25_010146 PE=4 SV=1	PF06046/1.7E-155/Exocyst complex component Sec6	biological_process:GO:0006887//exocytosis;cellular_component:GO:0000145//exocyst;
RHS03316	OQS00508.1/0/glutamine-dependent NAD(+) synthetase [Achlya hypogyna]	P38795/0.0/NADE_YEAST Glutamine-dependent NAD(+) synthetase OS=Saccharomyces cerevisiae (strain ATCC 204508 / S288c) OX=559292 GN=QNS1 PE=1 SV=1	mis:MICPUN_92688/0.0/carbon nitrogen hydrolase/NAD synthase; K01950 NAD+ synthase (glutamine-hydrolysing) [EC:6.3.5.1]	YHR074w/0.0/[HR] KOG2303 Predicted NAD synthase, contains CN hydrolase domain	A0A0C9XVH1/0.0/A0A0C9XVH1_9AGAR Glutamine-dependent NAD(+) synthetase OS=Laccaria amethystina LaAM-08-1 OX=1095629 GN=K443DRAFT_672041 PE=3 SV=1	TIGR00552/8.6E-19/nadE: NAD+ synthetase	biological_process:GO:0009435//NAD biosynthetic process;molecular_function:GO:0005524//ATP binding;GO:0003952//NAD+ synthase (glutamine-hydrolyzing) activity;GO:0016810//hydrolase activity, acting on carbon-nitrogen (but not peptide) bonds;
RHS03317	OWZ18359.1/5.30067e-58/P21-activated protein kinase-interacting protein [Phytophthora megakarya]	Q6TNS2/1e-55/PK1IP_DANRE p21-activated protein kinase-interacting protein 1-like OS=Danio rerio OX=7955 GN=pak1ip1 PE=2 SV=1	pda:103710520/9e-46/p21-activated protein kinase-interacting protein 1-like isoform X2; K14830 protein MAK11	Hs20556143/8e-47/[S] KOG0294 WD40 repeat-containing protein	A0A284RY90/0.0/A0A284RY90_9AGAR Uncharacterized protein OS=Armillaria ostoyae OX=47428 GN=ARMOST_17171 PE=4 SV=1	PS50082/12.848/Trp-Asp (WD) repeats profile.	NA
RHS03318	XP_015643958.1/1.25365e-47/PREDICTED: G patch domain-containing protein TGH homolog [Oryza sativa Japonica Group] &gt;Q67VW6.1 RecName: Full=G patch domain-containing protein TGH homolog; AltName: Full=Protein TOUGH homolog &gt;BAD37703.1 putative SWAP (Suppressor-of-White-APricot)/surp domain-containing protein [Oryza sativa Japonica Group] &gt;BAF19586.1 Os06g0489200 [Oryza sativa Japonica Grou…	Q24K12/6e-70/GPTC1_BOVIN G patch domain-containing protein 1 OS=Bos taurus OX=9913 GN=GPATCH1 PE=2 SV=1	osa:4341077/2e-48/G patch domain-containing protein TGH homolog; K13123 G patch domain-containing protein 1	Hs21361684/1e-67/[A] KOG2138 Predicted RNA binding protein, contains G-patch domain	A0A2H3BHG3/0.0/A0A2H3BHG3_9AGAR DUF1604-domain-containing protein OS=Armillaria solidipes OX=1076256 GN=ARMSODRAFT_957437 PE=4 SV=1	PF07713/1.1E-39/Protein of unknown function (DUF1604)	biological_process:GO:0006397//mRNA processing;GO:0035196//production of miRNAs involved in gene silencing by miRNA;GO:0040008//regulation of growth;GO:0030422//production of siRNA involved in RNA interference;GO:0010087//phloem or xylem histogenesis;cellular_component:GO:0005634//nucleus;molecular_function:GO:0003723//RNA binding;GO:0070883//pre-miRNA binding;GO:0070878//primary miRNA binding;GO…
RHS03319	XP_003074568.1/4.69643e-19/MADS box transcription factor (ISS) [Ostreococcus tauri]	Q03413/5e-19/MEF2D_XENLA Myocyte-specific enhancer factor 2D homolog OS=Xenopus laevis OX=8355 GN=mef2d PE=1 SV=1	csl:COCSUDRAFT_16128/5e-19/myocyte enhancer factor 2D; K09260 MADS-box transcription enhancer factor 2A	YBR182c/2e-19/[K] KOG0014 MADS box transcription factor	K5W3N7/1e-109/K5W3N7_AGABU Uncharacterized protein OS=Agaricus bisporus var. burnettii (strain JB137-S8 / ATCC MYA-4627 / FGSC 10392) OX=597362 GN=AGABI1DRAFT_111759 PE=4 SV=1	PR00404/6.4E-14/MADS domain signature	biological_process:GO:0045944//positive regulation of transcription from RNA polymerase II promoter;GO:0006351//transcription, DNA-templated;cellular_component:GO:0005634//nucleus;molecular_function:GO:0000977//RNA polymerase II regulatory region sequence-specific DNA binding;GO:0046983//protein dimerization activity;
RHS03320	XP_019444435.1/2.66334e-13/PREDICTED: glycolipid transfer protein 1-like isoform X4 [Lupinus angustifolius] &gt;XP_019444436.1 PREDICTED: glycolipid transfer protein 1-like isoform X4 [Lupinus angustifolius] &gt;OIW11254.1 hypothetical protein TanjilG_28345 [Lupinus angustifolius]	D3ZY60/1e-16/PKHA8_RAT Pleckstrin homology domain-containing family A member 8 OS=Rattus norvegicus OX=10116 GN=Plekha8 PE=1 SV=1	ccav:112518840/6e-12/glycolipid transfer protein 1; K08051 pleckstrin homology domain containing family A member 8	Hs7705684_2/2e-15/[G] KOG3221 Glycolipid transfer protein	A0A0C2WQ86/0.0/A0A0C2WQ86_AMAMU Uncharacterized protein OS=Amanita muscaria Koide BX008 OX=946122 GN=M378DRAFT_15215 PE=4 SV=1	PF08718/8.3E-40/Glycolipid transfer protein (GLTP)	cellular_component:GO:0005737//cytoplasm;molecular_function:GO:0120013//intermembrane lipid transfer activity;
RHS03321	NA	NA	NA	NA	A0A067NFU1/5e-11/A0A067NFU1_PLEOS Uncharacterized protein OS=Pleurotus ostreatus PC15 OX=1137138 GN=PLEOSDRAFT_159191 PE=4 SV=1	NA	NA
RHS03322	NA	Q09922/9e-29/YAKB_SCHPO Uncharacterized transcriptional regulatory protein C1F7.11c OS=Schizosaccharomyces pombe (strain 972 / ATCC 24843) OX=284812 GN=SPAC1F7.11c PE=4 SV=1	NA	NA	A0A0D2KPJ5/0.0/A0A0D2KPJ5_9AGAR Uncharacterized protein OS=Hypholoma sublateritium FD-334 SS-4 OX=945553 GN=HYPSUDRAFT_80028 PE=4 SV=1	PS50048/9.853/Zn(2)-C6 fungal-type DNA-binding domain profile.	NA
RHS03323	NA	NA	NA	NA	A0A0C9X538/3e-13/A0A0C9X538_9AGAR Unplaced genomic scaffold K443scaffold_97, whole genome shotgun sequence OS=Laccaria amethystina LaAM-08-1 OX=1095629 GN=K443DRAFT_679405 PE=4 SV=1	NA	NA
RHS03324	NA	NA	NA	NA	A0A067TKR5/3e-33/A0A067TKR5_GALM3 Uncharacterized protein OS=Galerina marginata (strain CBS 339.88) OX=685588 GN=GALMADRAFT_208556 PE=4 SV=1	NA	NA
RHS03325	NA	NA	NA	NA	A0A067SV37/6e-08/A0A067SV37_GALM3 Uncharacterized protein OS=Galerina marginata (strain CBS 339.88) OX=685588 GN=GALMADRAFT_213838 PE=4 SV=1	NA	NA
RHS03326	NA	NA	NA	NA	A0A067SV37/3e-61/A0A067SV37_GALM3 Uncharacterized protein OS=Galerina marginata (strain CBS 339.88) OX=685588 GN=GALMADRAFT_213838 PE=4 SV=1	NA	NA
RHS03327	XP_005821632.1/3.19611e-27/hypothetical protein GUITHDRAFT_158798 [Guillardia theta CCMP2712] &gt;EKX34652.1 hypothetical protein GUITHDRAFT_158798 [Guillardia theta CCMP2712]	D4AYS6/8e-33/A1345_ARTBC Probable extracellular serine carboxypeptidase OS=Arthroderma benhamiae (strain ATCC MYA-4681 / CBS 112371) OX=663331 GN=ARB_01345 PE=1 SV=1	mesc:110626333/2e-19/lysosomal Pro-X carboxypeptidase-like; K01285 lysosomal Pro-X carboxypeptidase [EC:3.4.16.2]	CE00272/6e-31/[OR] KOG2182 Hydrolytic enzymes of the alpha/beta hydrolase fold	A0A2A9NK57/0.0/A0A2A9NK57_9AGAR Uncharacterized protein OS=Amanita thiersii Skay4041 OX=703135 GN=AMATHDRAFT_192255 PE=4 SV=1	PF05577/1.7E-14/Serine carboxypeptidase S28	molecular_function:GO:0008236//serine-type peptidase activity;
RHS03328	NA	NA	NA	NA	A0A0C9Y434/5e-93/A0A0C9Y434_9AGAR Unplaced genomic scaffold K443scaffold_31, whole genome shotgun sequence OS=Laccaria amethystina LaAM-08-1 OX=1095629 GN=K443DRAFT_92444 PE=4 SV=1	NA	NA
RHS03329	XP_005823432.1/4.03518e-77/hypothetical protein GUITHDRAFT_78881, partial [Guillardia theta CCMP2712] &gt;EKX36452.1 hypothetical protein GUITHDRAFT_78881, partial [Guillardia theta CCMP2712]	B0E2U2/0.0/VPS10_LACBS Vacuolar protein sorting/targeting protein 10 OS=Laccaria bicolor (strain S238N-H82 / ATCC MYA-4686) OX=486041 GN=VPS10 PE=3 SV=1	NA	SPBC16C6.06/0.0/[R] KOG3511 Sortilin and related receptors	A0A369KA45/0.0/A0A369KA45_HYPMA Sortilin OS=Hypsizygus marmoreus OX=39966 GN=VPS10 PE=4 SV=1	PF04082/1.3E-22/Fungal specific transcription factor domain	cellular_component:GO:0016021//integral component of membrane;
RHS03330	XP_009516886.1/2.24467e-68/hypothetical protein PHYSODRAFT_284485 [Phytophthora sojae] &gt;EGZ29611.1 hypothetical protein PHYSODRAFT_284485 [Phytophthora sojae]	Q3L245/1e-122/PDH1_LEUMG Pyranose dehydrogenase 1 OS=Leucoagaricus meleagris OX=201219 GN=pdh1 PE=1 SV=1	csl:COCSUDRAFT_60347/1e-47/alcohol oxidase; K22464 fatty acid photodecarboxylase [EC:4.1.1.106]	7293011/5e-70/[R] KOG1238 Glucose dehydrogenase/choline dehydrogenase/mandelonitrile lyase (GMC oxidoreductase family)	A0A369JWC5/0.0/A0A369JWC5_HYPMA Pyranose dehydrogenase 3 OS=Hypsizygus marmoreus OX=39966 GN=pdh3_0 PE=4 SV=1	PF00732/1.6E-52/GMC oxidoreductase	biological_process:GO:0019285//glycine betaine biosynthetic process from choline;molecular_function:GO:0016614//oxidoreductase activity, acting on CH-OH group of donors;GO:0008812//choline dehydrogenase activity;GO:0050660//flavin adenine dinucleotide binding;
RHS03331	ETI39196.1/6.89909e-74/choline dehydrogenase [Phytophthora parasitica P1569]	Q0R4L2/4e-137/PDH3_LEUMG Pyranose dehydrogenase 3 OS=Leucoagaricus meleagris OX=201219 GN=pdh3 PE=2 SV=1	csl:COCSUDRAFT_60347/1e-57/alcohol oxidase; K22464 fatty acid photodecarboxylase [EC:4.1.1.106]	7293011/2e-76/[R] KOG1238 Glucose dehydrogenase/choline dehydrogenase/mandelonitrile lyase (GMC oxidoreductase family)	A0A369K277/0.0/A0A369K277_HYPMA Pyranose dehydrogenase 3 OS=Hypsizygus marmoreus OX=39966 GN=pdh3_7 PE=4 SV=1	PF00732/1.3E-61/GMC oxidoreductase	molecular_function:GO:0016614//oxidoreductase activity, acting on CH-OH group of donors;GO:0050660//flavin adenine dinucleotide binding;
RHS03332	BAK00735.1/9.86272e-71/predicted protein [Hordeum vulgare subsp. vulgare]	Q5AUN2/7e-79/XPTC_EMENI Dehydrogenase xptC OS=Emericella nidulans (strain FGSC A4 / ATCC 38163 / CBS 112.46 / NRRL 194 / M139) OX=227321 GN=xptC PE=3 SV=1	csl:COCSUDRAFT_60347/1e-46/alcohol oxidase; K22464 fatty acid photodecarboxylase [EC:4.1.1.106]	Hs18556423/2e-66/[R] KOG1238 Glucose dehydrogenase/choline dehydrogenase/mandelonitrile lyase (GMC oxidoreductase family)	A0A409WQE6/0.0/A0A409WQE6_PSICY Uncharacterized protein OS=Psilocybe cyanescens OX=93625 GN=CVT25_001843 PE=4 SV=1	PF00732/3.1E-56/GMC oxidoreductase	molecular_function:GO:0016614//oxidoreductase activity, acting on CH-OH group of donors;GO:0050660//flavin adenine dinucleotide binding;
RHS03333	XP_009348152.1/5.14689e-53/PREDICTED: fumarylacetoacetate hydrolase domain-containing protein 2 homolog [Pyrus x bretschneideri] &gt;XP_018379015.1 hypothetical protein CC77DRAFT_666734 [Alternaria alternata] &gt;OAG13594.1 hypothetical protein CC77DRAFT_666734 [Alternaria alternata] &gt;OWY42183.1 fumarylacetoacetate hydrolase family protein-like protein [Alternaria alternata]	Q6GLT8/4e-47/FAHD2_XENLA Fumarylacetoacetate hydrolase domain-containing protein 2 OS=Xenopus laevis OX=8355 GN=fahd2 PE=2 SV=1	gsl:Gasu_60660/2e-33/5-oxopent-3-end-1,2,5-tricarboxylate decarboxylase; K01557 acylpyruvate hydrolase [EC:3.7.1.5]	7300802/3e-44/[R] KOG1535 Predicted fumarylacetoacetate hydralase	A0A369JZK0/0.0/A0A369JZK0_HYPMA Fumarylacetoacetate hydrolase domain-containing protein 2 OS=Hypsizygus marmoreus OX=39966 GN=fahd2_1 PE=4 SV=1	PF01557/2.0E-50/Fumarylacetoacetate (FAA) hydrolase family	biological_process:GO:0008152//metabolic process;molecular_function:GO:0016853//isomerase activity;GO:0003824//catalytic activity;
RHS03334	EPS59833.1/9.21618e-97/hypothetical protein M569_14970 [Genlisea aurea]	Q9HFU4/3e-114/MPI_CRYNJ Mannose-6-phosphate isomerase OS=Cryptococcus neoformans var. neoformans serotype D (strain JEC21 / ATCC MYA-565) OX=214684 GN=MAN1 PE=3 SV=2	nnu:104602920/3e-93/mannose-6-phosphate isomerase 2-like; K01809 mannose-6-phosphate isomerase [EC:5.3.1.8]	YER003c/5e-95/[G] KOG2757 Mannose-6-phosphate isomerase	A0A0C3CEN2/5e-180/A0A0C3CEN2_HEBCY Mannose-6-phosphate isomerase OS=Hebeloma cylindrosporum h7 OX=686832 GN=M413DRAFT_444327 PE=3 SV=1	PR00714/1.5E-62/Phosphomannose isomerase type I signature	biological_process:GO:0005975//carbohydrate metabolic process;GO:0009298//GDP-mannose biosynthetic process;molecular_function:GO:0008270//zinc ion binding;GO:0004476//mannose-6-phosphate isomerase activity;
RHS03335	XP_008869374.1/4.11385e-44/hypothetical protein H310_06187 [Aphanomyces invadans] &gt;ETW01526.1 hypothetical protein H310_06187 [Aphanomyces invadans]	A7UX13/7e-69/EGT2_NEUCR Hercynylcysteine sulfoxide lyase OS=Neurospora crassa (strain ATCC 24698 / 74-OR23-1A / CBS 708.71 / DSM 1257 / FGSC 987) OX=367110 GN=egt-2 PE=1 SV=1	jre:109007781/3e-39/L-cysteine desulfhydrase; K22207 L-cysteine desulfhydrase [EC:4.4.1.28]	SPBC660.12c/6e-50/[E] KOG1549 Cysteine desulfurase NFS1	A0A409XXT0/6e-170/A0A409XXT0_9AGAR Uncharacterized protein OS=Gymnopilus dilepis OX=231916 GN=CVT26_008602 PE=4 SV=1	PF00266/6.1E-17/Aminotransferase class-V	molecular_function:GO:0003824//catalytic activity;
RHS03336	NA	NA	NA	NA	X8JIQ6/1e-13/X8JIQ6_9AGAM Uncharacterized protein OS=Rhizoctonia solani AG-3 Rhs1AP OX=1086054 GN=RSOL_459060 PE=4 SV=1	NA	NA
RHS03337	NA	NA	NA	NA	M5CD58/1e-09/M5CD58_THACB Uncharacterized protein OS=Thanatephorus cucumeris (strain AG1-IB / isolate 7/3/14) OX=1108050 GN=BN14_11348 PE=4 SV=1	NA	NA
RHS03338	XP_005833730.1/1.66476e-51/hypothetical protein GUITHDRAFT_162917 [Guillardia theta CCMP2712] &gt;EKX46750.1 hypothetical protein GUITHDRAFT_162917 [Guillardia theta CCMP2712]	A7UX13/9e-90/EGT2_NEUCR Hercynylcysteine sulfoxide lyase OS=Neurospora crassa (strain ATCC 24698 / 74-OR23-1A / CBS 708.71 / DSM 1257 / FGSC 987) OX=367110 GN=egt-2 PE=1 SV=1	fve:101297568/2e-46/L-cysteine desulfhydrase-like; K22207 L-cysteine desulfhydrase [EC:4.4.1.28]	SPBC660.12c/6e-66/[E] KOG1549 Cysteine desulfurase NFS1	A0A369K291/0.0/A0A369K291_HYPMA Hercynylcysteine sulfoxide lyase OS=Hypsizygus marmoreus OX=39966 GN=egt-2 PE=4 SV=1	PF00266/2.0E-18/Aminotransferase class-V	molecular_function:GO:0003824//catalytic activity;
RHS03339	NA	NA	NA	NA	A0A369JZ40/2e-119/A0A369JZ40_HYPMA Uncharacterized protein OS=Hypsizygus marmoreus OX=39966 GN=Hypma_003292 PE=4 SV=1	NA	NA
RHS03340	XP_009036677.1/4.5405e-39/hypothetical protein AURANDRAFT_25657 [Aureococcus anophagefferens] &gt;EGB08687.1 hypothetical protein AURANDRAFT_25657 [Aureococcus anophagefferens]	O94285/2e-54/RPC8_SCHPO DNA-directed RNA polymerase III subunit rpc8 OS=Schizosaccharomyces pombe (strain 972 / ATCC 24843) OX=284812 GN=rpc25 PE=1 SV=1	gra:105766668/3e-34/DNA-directed RNA polymerase III subunit RPC8; K03022 DNA-directed RNA polymerase III subunit RPC8	SPBC2G5.07c/1e-54/[K] KOG3297 DNA-directed RNA polymerase subunit E'	A0A369K209/8e-138/A0A369K209_HYPMA DNA-directed RNA polymerase III subunit rpc8 OS=Hypsizygus marmoreus OX=39966 GN=rpc25 PE=4 SV=1	PF03876/2.2E-17/SHS2 domain found in N terminus of Rpb7p/Rpc25p/MJ0397	biological_process:GO:0006351//transcription, DNA-templated;molecular_function:GO:0003899//DNA-directed 5'-3' RNA polymerase activity;
RHS03341	BAJ89288.1/3.94071e-52/predicted protein [Hordeum vulgare subsp. vulgare]	Q9P6L7/4e-52/YKQ9_SCHPO Uncharacterized mitochondrial carrier C688.09 OS=Schizosaccharomyces pombe (strain 972 / ATCC 24843) OX=284812 GN=SPAC688.09 PE=3 SV=1	gsl:Gasu_17750/2e-25/mitochondrial carrier; K15116 solute carrier family 25, member 33/36	SPAC688.09/2e-52/[C] KOG0757 Mitochondrial carrier protein - Rim2p/Mrs12p	A0A0C3GHP2/5e-121/A0A0C3GHP2_9AGAM Uncharacterized protein OS=Piloderma croceum F 1598 OX=765440 GN=PILCRDRAFT_811889 PE=3 SV=1	PS50920/17.944/Solute carrier (Solcar) repeat profile.	biological_process:GO:0055085//transmembrane transport;GO:1990519//pyrimidine nucleotide import into mitochondrion;GO:0006839//mitochondrial transport;cellular_component:GO:0005743//mitochondrial inner membrane;GO:0016021//integral component of membrane;molecular_function:GO:0015218//pyrimidine nucleotide transmembrane transporter activity;
RHS03342	XP_005829981.1/6.54115e-39/hypothetical protein GUITHDRAFT_73545 [Guillardia theta CCMP2712] &gt;EKX43001.1 hypothetical protein GUITHDRAFT_73545 [Guillardia theta CCMP2712]	D3Z902/1e-64/FBXW7_RAT F-box/WD repeat-containing protein 7 OS=Rattus norvegicus OX=10116 GN=Fbxw7 PE=1 SV=2	csl:COCSUDRAFT_23114/5e-35/WD40 repeat-like protein; K10260 F-box and WD-40 domain protein 7	Hs16117781/8e-65/[R] KOG0274 Cdc4 and related F-box and WD-40 proteins	A0A137QSR8/0.0/A0A137QSR8_9AGAR F-box/WD repeat-containing protein 7 OS=Leucoagaricus sp. SymC.cos OX=1714833 GN=AN958_04358 PE=4 SV=1	PR00320/6.0E-7/G protein beta WD-40 repeat signature	molecular_function:GO:0004842//ubiquitin-protein transferase activity;
RHS03343	CCA17941.1/2.52599e-60/ion channel putative [Albugo laibachii Nc14]	Q9QYI3/3e-73/DNJC7_MOUSE DnaJ homolog subfamily C member 7 OS=Mus musculus OX=10090 GN=Dnajc7 PE=1 SV=2	ppp:112278813/5e-42/dnaJ protein P58IPK homolog B-like; K09523 DnaJ homolog subfamily C member 3	SPBC543.02c/2e-73/[O] KOG0550 Molecular chaperone (DnaJ superfamily)	A0A2A9N774/0.0/A0A2A9N774_9AGAR Uncharacterized protein OS=Amanita thiersii Skay4041 OX=703135 GN=AMATHDRAFT_71065 PE=4 SV=1	PS50005/5.871/TPR repeat profile.	NA
RHS03344	ETI51075.1/7.09728e-48/deoxyribose-phosphate aldolase [Phytophthora parasitica P1569] &gt;ETP48784.1 deoxyribose-phosphate aldolase [Phytophthora parasitica P10297]	P0CH94/3e-48/DEOC_COCIM Deoxyribose-phosphate aldolase OS=Coccidioides immitis (strain RS) OX=246410 GN=CIMG_00461 PE=3 SV=1	NA	Hs7705718/6e-12/[F] KOG3981 Deoxyribose-phosphate aldolase	A0A067TD06/7e-101/A0A067TD06_GALM3 Uncharacterized protein OS=Galerina marginata (strain CBS 339.88) OX=685588 GN=GALMADRAFT_91728 PE=3 SV=1	TIGR00126/5.4E-67/deoC: deoxyribose-phosphate aldolase	biological_process:GO:0009264//deoxyribonucleotide catabolic process;cellular_component:GO:0005737//cytoplasm;molecular_function:GO:0003677//DNA binding;GO:0004139//deoxyribose-phosphate aldolase activity;
RHS03345	OQS02453.1/2.28597e-67/tripeptidyl-peptidase [Thraustotheca clavata]	Q70GH4/3e-132/SED3_ASPFU Tripeptidyl-peptidase sed3 OS=Neosartorya fumigata (strain ATCC MYA-4609 / Af293 / CBS 101355 / FGSC A1100) OX=330879 GN=sed3 PE=1 SV=1	gsl:Gasu_62160/2e-20/tripeptidyl-peptidase I; K01279 tripeptidyl-peptidase I [EC:3.4.14.9]	NA	A0A067TLM3/0.0/A0A067TLM3_GALM3 Uncharacterized protein OS=Galerina marginata (strain CBS 339.88) OX=685588 GN=GALMADRAFT_693836 PE=4 SV=1	PF09286/2.1E-38/Pro-kumamolisin, activation domain	cellular_component:GO:0016021//integral component of membrane;molecular_function:GO:0004252//serine-type endopeptidase activity;GO:0046872//metal ion binding;
RHS03346	NA	NA	NA	NA	A0A0C9WVT1/3e-40/A0A0C9WVT1_9AGAR Unplaced genomic scaffold K443scaffold_42, whole genome shotgun sequence OS=Laccaria amethystina LaAM-08-1 OX=1095629 GN=K443DRAFT_676515 PE=4 SV=1	NA	NA
RHS03347	XP_011025638.1/1.11156e-12/PREDICTED: acyl-CoA--sterol O-acyltransferase 1-like [Populus euphratica]	A0A0M3STV6/2e-10/AURG_CALAK Acetyltransferase aurG OS=Calcarisporium arbuscula OX=240499 GN=aurG PE=3 SV=1	ccav:112500325/5e-08/fimbrin-4-like isoform X1; K17275 plastin-1	At1g34490/8e-09/[IV] LSE0119 A Wax synthase	A0A369JSC6/1e-96/A0A369JSC6_HYPMA Long-chain-alcohol O-fatty-acyltransferase OS=Hypsizygus marmoreus OX=39966 GN=WAXS1 PE=4 SV=1	PF13813/5.7E-14/Membrane bound O-acyl transferase family	cellular_component:GO:0016021//integral component of membrane;molecular_function:GO:0008374//O-acyltransferase activity;
RHS03348	XP_005717010.1/8.48849e-52/unnamed protein product [Chondrus crispus] &gt;CDF37191.1 unnamed protein product [Chondrus crispus]	Q52KW8/7e-43/RCC2_XENLA Protein RCC2 homolog OS=Xenopus laevis OX=8355 GN=rcc2 PE=2 SV=1	ppp:112282946/2e-18/probable E3 ubiquitin-protein ligase HERC4 isoform X1; K10615 E3 ubiquitin-protein ligase HERC4 [EC:2.3.2.26]	At1g19880/6e-41/[S] KOG1427 Uncharacterized conserved protein, contains RCC1 domain	A0A409YQE5/0.0/A0A409YQE5_9AGAR Uncharacterized protein OS=Panaeolus cyanescens OX=181874 GN=CVT24_010340 PE=4 SV=1	PF00415/2.1E-11/Regulator of chromosome condensation (RCC1) repeat	NA
RHS03349	NA	NA	NA	NA	A0A0C2XYK7/1e-79/A0A0C2XYK7_HEBCY Uncharacterized protein OS=Hebeloma cylindrosporum h7 OX=686832 GN=M413DRAFT_444375 PE=4 SV=1	NA	NA
RHS03350	NA	NA	NA	NA	A0A137QSS1/4e-27/A0A137QSS1_9AGAR Uncharacterized protein OS=Leucoagaricus sp. SymC.cos OX=1714833 GN=AN958_04381 PE=4 SV=1	NA	NA
RHS03351	XP_005535962.1/4.0296e-79/squalene synthase [Cyanidioschyzon merolae strain 10D] &gt;BAM79676.1 squalene synthase [Cyanidioschyzon merolae strain 10D]	Q92459/1e-157/FDFT_USTMA Squalene synthase OS=Ustilago maydis (strain 521 / FGSC 9021) OX=237631 GN=ERG9 PE=3 SV=2	cme:CYME_CMG178C/8e-80/squalene synthase; K00801 farnesyl-diphosphate farnesyltransferase [EC:2.5.1.21]	SPBC646.05c/1e-128/[I] KOG1459 Squalene synthetase	A0A0C2XPI2/0.0/A0A0C2XPI2_HEBCY Uncharacterized protein OS=Hebeloma cylindrosporum h7 OX=686832 GN=M413DRAFT_447022 PE=4 SV=1	PF00494/4.6E-35/Squalene/phytoene synthase	biological_process:GO:0006696//ergosterol biosynthetic process;cellular_component:GO:0016021//integral component of membrane;molecular_function:GO:0004310//farnesyl-diphosphate farnesyltransferase activity;GO:0051996//squalene synthase activity;
RHS03352	XP_002313329.1/4.10142e-16/hypothetical protein POPTR_0009s05980g [Populus trichocarpa] &gt;EEE87284.1 hypothetical protein POPTR_0009s05980g [Populus trichocarpa]	Q9FJ73/2e-10/WAXS2_ARATH Probable long-chain-alcohol O-fatty-acyltransferase 2 OS=Arabidopsis thaliana OX=3702 GN=AT2 PE=3 SV=1	NA	At5g55370/9e-11/[IV] LSE0119 A Wax synthase	A0A369JSC6/2e-88/A0A369JSC6_HYPMA Long-chain-alcohol O-fatty-acyltransferase OS=Hypsizygus marmoreus OX=39966 GN=WAXS1 PE=4 SV=1	PF13813/7.3E-16/Membrane bound O-acyl transferase family	cellular_component:GO:0016021//integral component of membrane;molecular_function:GO:0008374//O-acyltransferase activity;
RHS03353	NA	NA	NA	NA	A0A0C3BVA8/2e-70/A0A0C3BVA8_HEBCY Uncharacterized protein OS=Hebeloma cylindrosporum h7 OX=686832 GN=M413DRAFT_445997 PE=4 SV=1	NA	NA
RHS03354	XP_022152056.1/1.00977e-64/alpha-L-arabinofuranosidase 1-like [Momordica charantia] &gt;XP_022152057.1 alpha-L-arabinofuranosidase 1-like [Momordica charantia]	Q0CTV2/2e-101/ABFA_ASPTN Probable alpha-L-arabinofuranosidase A OS=Aspergillus terreus (strain NIH 2624 / FGSC A1156) OX=341663 GN=abfA PE=3 SV=1	lsv:111881055/2e-65/alpha-L-arabinofuranosidase 1-like; K01209 alpha-N-arabinofuranosidase [EC:3.2.1.55]	NA	A0A0C9TE23/0.0/A0A0C9TE23_9AGAM Unplaced genomic scaffold SPHSTscaffold_259, whole genome shotgun sequence OS=Sphaerobolus stellatus SS14 OX=990650 GN=M422DRAFT_236061 PE=4 SV=1	PF06964/7.2E-31/Alpha-L-arabinofuranosidase C-terminal domain	biological_process:GO:0046373//L-arabinose metabolic process;cellular_component:GO:0016021//integral component of membrane;molecular_function:GO:0046556//alpha-L-arabinofuranosidase activity;
RHS03355	EWM24197.1/1.12806e-72/actin binding protein [Nannochloropsis gaditana]	O13923/2e-111/CORO_SCHPO Coronin-like protein crn1 OS=Schizosaccharomyces pombe (strain 972 / ATCC 24843) OX=284812 GN=crn1 PE=1 SV=1	zma:100276374/5e-12/uncharacterized protein LOC100276374; K14963 COMPASS component SWD3	SPAC23C4.02/1e-111/[Z] KOG0303 Actin-binding protein Coronin, contains WD40 repeats	A0A409WKC5/0.0/A0A409WKC5_9AGAR Coronin OS=Gymnopilus dilepis OX=231916 GN=CVT26_003825 PE=3 SV=1	PF00400/3.1E-5/WD domain, G-beta repeat	NA
RHS03356	XP_005648064.1/1.0051e-114/glycine cleavage system, T protein [Coccomyxa subellipsoidea C-169] &gt;EIE23520.1 glycine cleavage system, T protein [Coccomyxa subellipsoidea C-169]	O14110/4e-124/GCST_SCHPO Probable aminomethyltransferase, mitochondrial OS=Schizosaccharomyces pombe (strain 972 / ATCC 24843) OX=284812 GN=gcv1 PE=3 SV=1	csl:COCSUDRAFT_28888/2e-115/glycine cleavage system, T protein; K00605 aminomethyltransferase [EC:2.1.2.10]	SPAC31G5.14/2e-124/[E] KOG2770 Aminomethyl transferase	K5XE87/0.0/K5XE87_AGABU Aminomethyltransferase OS=Agaricus bisporus var. burnettii (strain JB137-S8 / ATCC MYA-4627 / FGSC 10392) OX=597362 GN=AGABI1DRAFT_111807 PE=3 SV=1	TIGR00528/8.4E-104/gcvT: glycine cleavage system T protein	biological_process:GO:0006546//glycine catabolic process;cellular_component:GO:0005739//mitochondrion;molecular_function:GO:0008483//transaminase activity;GO:0004047//aminomethyltransferase activity;
RHS03357	XP_020572670.1/8.73827e-24/protein artemis [Phalaenopsis equestris]	Q4KLY6/6e-26/DCR1B_RAT 5' exonuclease Apollo OS=Rattus norvegicus OX=10116 GN=Dclre1b PE=1 SV=2	peq:110019369/2e-24/protein artemis; K15340 DNA cross-link repair 1A protein	Hs12383082/3e-25/[L] KOG1361 Predicted hydrolase involved in interstrand cross-link repair	A0A0C9XPK0/0.0/A0A0C9XPK0_9AGAR Unplaced genomic scaffold K443scaffold_111, whole genome shotgun sequence OS=Laccaria amethystina LaAM-08-1 OX=1095629 GN=K443DRAFT_133046 PE=4 SV=1	PF07522/4.8E-10/DNA repair metallo-beta-lactamase	NA
RHS03358	CDP02637.1/6.21233e-97/unnamed protein product [Coffea canephora]	Q14534/1e-110/ERG1_HUMAN Squalene monooxygenase OS=Homo sapiens OX=9606 GN=SQLE PE=1 SV=3	ccav:112519150/2e-99/squalene epoxidase 3-like; K00511 squalene monooxygenase [EC:1.14.14.17]	Hs4507197/6e-108/[I] KOG1298 Squalene monooxygenase	A0A067TCY6/0.0/A0A067TCY6_GALM3 Uncharacterized protein OS=Galerina marginata (strain CBS 339.88) OX=685588 GN=GALMADRAFT_241584 PE=4 SV=1	PR00420/3.8E-8/Aromatic-ring hydroxylase (flavoprotein monooxygenase) signature	cellular_component:GO:0016021//integral component of membrane;molecular_function:GO:0050660//flavin adenine dinucleotide binding;GO:0004506//squalene monooxygenase activity;
RHS03359	XP_005718196.1/6.69613e-28/unnamed protein product [Chondrus crispus] &gt;CDF38311.1 unnamed protein product [Chondrus crispus]	P32320/4e-34/CDD_HUMAN Cytidine deaminase OS=Homo sapiens OX=9606 GN=CDA PE=1 SV=2	gsl:Gasu_41700/2e-28/cytidine deaminase; K01489 cytidine deaminase [EC:3.5.4.5]	Hs11386157/2e-34/[F] KOG0833 Cytidine deaminase	A0A067TM71/1e-89/A0A067TM71_GALM3 Cytidine deaminase OS=Galerina marginata (strain CBS 339.88) OX=685588 GN=GALMADRAFT_241581 PE=3 SV=1	TIGR01354/1.6E-38/cyt_deam_tetra: cytidine deaminase	molecular_function:GO:0004126//cytidine deaminase activity;GO:0008270//zinc ion binding;
RHS03360	XP_009835489.1/1.13492e-63/hypothetical protein H257_10590 [Aphanomyces astaci] &gt;ETV74985.1 hypothetical protein H257_10590 [Aphanomyces astaci]	E3QQU9/4e-94/LAP1_COLGM Leucine aminopeptidase 1 OS=Colletotrichum graminicola (strain M1.001 / M2 / FGSC 10212) OX=645133 GN=LAP1 PE=3 SV=1	NA	YDR415c/4e-71/[OPR] KOG2195 Transferrin receptor and related proteins containing the protease-associated (PA) domain	A0A067QMJ5/0.0/A0A067QMJ5_9AGAM Peptide hydrolase OS=Jaapia argillacea MUCL 33604 OX=933084 GN=JAAARDRAFT_684578 PE=3 SV=1	PF04389/3.4E-18/Peptidase family M28	NA
RHS03361	XP_009526896.1/9.76762e-70/hypothetical protein PHYSODRAFT_501475 [Phytophthora sojae] &gt;EGZ17838.1 hypothetical protein PHYSODRAFT_501475 [Phytophthora sojae]	P30821/4e-84/P25_SCHPO P25 protein OS=Schizosaccharomyces pombe (strain 972 / ATCC 24843) OX=284812 GN=obr1 PE=1 SV=1	csl:COCSUDRAFT_31027/5e-64/LEDI-3 protein; K03809 NAD(P)H dehydrogenase (quinone) [EC:1.6.5.2]	SPAC3C7.14c/2e-84/[R] KOG3135 1,4-benzoquinone reductase-like; Trp repressor binding protein-like/protoplast-secreted protein	K5V995/2e-94/K5V995_PHACS Uncharacterized protein OS=Phanerochaete carnosa (strain HHB-10118-sp) OX=650164 GN=PHACADRAFT_114036 PE=4 SV=1	TIGR01755/4.8E-60/flav_wrbA: NAD(P)H:quinone oxidoreductase, type IV	cellular_component:GO:0005886//plasma membrane;GO:0005737//cytoplasm;molecular_function:GO:0010181//FMN binding;GO:0003955//NAD(P)H dehydrogenase (quinone) activity;
RHS03362	XP_017258252.1/6.98059e-31/PREDICTED: uncharacterized protein LOC108227552 isoform X2 [Daucus carota subsp. sativus]	O74881/1e-101/BTB1_SCHPO BTB/POZ domain-containing protein 1 OS=Schizosaccharomyces pombe (strain 972 / ATCC 24843) OX=284812 GN=btb1 PE=1 SV=1	ccaj:109790028/2e-10/ultraviolet-B receptor UVR8-like isoform X1; K10614 E3 ubiquitin-protein ligase HERC3 [EC:2.3.2.26]	SPCC330.11/6e-102/[S] KOG0783 Uncharacterized conserved protein, contains ankyrin and BTB/POZ domains	A0A067TPY2/0.0/A0A067TPY2_GALM3 Uncharacterized protein OS=Galerina marginata (strain CBS 339.88) OX=685588 GN=GALMADRAFT_241641 PE=4 SV=1	PS50012/10.645/Regulator of chromosome condensation (RCC1) repeat profile.	NA
RHS03363	XP_005703311.1/0/ATP-dependent Clp protease ATP-binding subunit ClpB [Galdieria sulphuraria] &gt;EME26791.1 ATP-dependent Clp protease ATP-binding subunit ClpB [Galdieria sulphuraria]	O74402/0.0/HSP78_SCHPO Heat shock protein 78, mitochondrial OS=Schizosaccharomyces pombe (strain 972 / ATCC 24843) OX=284812 GN=hsp78 PE=3 SV=1	gsl:Gasu_55830/0.0/ATP-dependent Clp protease ATP-binding subunit ClpB; K03695 ATP-dependent Clp protease ATP-binding subunit ClpB	SPBC4F6.17c/0.0/[O] KOG1051 Chaperone HSP104 and related ATP-dependent Clp proteases	A0A0C9XC08/0.0/A0A0C9XC08_9AGAR Unplaced genomic scaffold K443scaffold_121, whole genome shotgun sequence OS=Laccaria amethystina LaAM-08-1 OX=1095629 GN=K443DRAFT_680291 PE=3 SV=1	PF10431/7.2E-21/C-terminal, D2-small domain, of ClpB protein	molecular_function:GO:0008233//peptidase activity;GO:0005524//ATP binding;
RHS03364	XP_005851210.1/1.62006e-11/hypothetical protein CHLNCDRAFT_137899 [Chlorella variabilis] &gt;EFN59108.1 hypothetical protein CHLNCDRAFT_137899 [Chlorella variabilis]	Q9HFE6/1e-14/YNW6_SCHPO Uncharacterized RNA-binding protein P16F5.06 OS=Schizosaccharomyces pombe (strain 972 / ATCC 24843) OX=284812 GN=SPBP16F5.06 PE=1 SV=1	NA	NA	A0A0C9WUZ8/9e-140/A0A0C9WUZ8_9AGAR Unplaced genomic scaffold K443scaffold_48, whole genome shotgun sequence OS=Laccaria amethystina LaAM-08-1 OX=1095629 GN=K443DRAFT_677010 PE=4 SV=1	PS50102/8.928/Eukaryotic RNA Recognition Motif (RRM) profile.	molecular_function:GO:0003723//RNA binding;
RHS03365	XP_002974184.1/5.7564e-08/hypothetical protein SELMODRAFT_414465 [Selaginella moellendorffii] &gt;EFJ25139.1 hypothetical protein SELMODRAFT_414465 [Selaginella moellendorffii]	NA	smo:SELMODRAFT_414465/1e-08/hypothetical protein; K14313 nuclear pore complex protein Nup53	NA	V2XJ17/4e-145/V2XJ17_MONRO Nucleoporin nup40 OS=Moniliophthora roreri (strain MCA 2997) OX=1381753 GN=Moror_4458 PE=4 SV=1	PF05172/3.1E-7/Nup53/35/40-type RNA recognition motif	biological_process:GO:0051028//mRNA transport;cellular_component:GO:0005643//nuclear pore;molecular_function:GO:0003676//nucleic acid binding;
RHS03366	XP_009526513.1/4.541e-28/hypothetical protein PHYSODRAFT_560104 [Phytophthora sojae] &gt;EGZ17455.1 hypothetical protein PHYSODRAFT_560104 [Phytophthora sojae]	Q0CJ62/9e-32/ATA_ASPTN 6-methylsalicylic acid decarboxylase atA OS=Aspergillus terreus (strain NIH 2624 / FGSC A1156) OX=341663 GN=atA PE=1 SV=1	pxb:103939786/1e-19/LOW QUALITY PROTEIN: uncharacterized protein LOC103939786; K00480 salicylate hydroxylase [EC:1.14.13.1]	At2g35660/1e-17/[CR] KOG2614 Kynurenine 3-monooxygenase and related flavoprotein monooxygenases	A0A067TCR7/0.0/A0A067TCR7_GALM3 Uncharacterized protein OS=Galerina marginata (strain CBS 339.88) OX=685588 GN=GALMADRAFT_1117498 PE=4 SV=1	PF01494/1.5E-14/FAD binding domain	molecular_function:GO:0071949//FAD binding;
RHS03367	XP_002893633.1/1.77176e-54/trimethylguanosine synthase isoform X1 [Arabidopsis lyrata subsp. lyrata] &gt;EFH69892.1 hypothetical protein ARALYDRAFT_336158 [Arabidopsis lyrata subsp. lyrata]	Q96RS0/6e-60/TGS1_HUMAN Trimethylguanosine synthase OS=Homo sapiens OX=9606 GN=TGS1 PE=1 SV=3	egr:104423247/1e-53/trimethylguanosine synthase; K14292 trimethylguanosine synthase [EC:2.1.1.-]	Hs19923661/2e-60/[R] KOG2730 Methylase	A0A0C9WU25/7e-149/A0A0C9WU25_9AGAR Unplaced genomic scaffold K443scaffold_55, whole genome shotgun sequence OS=Laccaria amethystina LaAM-08-1 OX=1095629 GN=K443DRAFT_96583 PE=4 SV=1	PF09445/1.7E-36/RNA cap guanine-N2 methyltransferase	biological_process:GO:0001510//RNA methylation;GO:0009452//7-methylguanosine RNA capping;molecular_function:GO:0008168//methyltransferase activity;
RHS03368	NA	NA	NA	NA	A0A0C3EV68/3e-108/A0A0C3EV68_9AGAM Uncharacterized protein OS=Piloderma croceum F 1598 OX=765440 GN=PILCRDRAFT_830179 PE=4 SV=1	PS50011/9.644/Protein kinase domain profile.	NA
RHS03369	NA	NA	NA	NA	A0A2H3JH20/3e-26/A0A2H3JH20_WOLCO Uncharacterized protein (Fragment) OS=Wolfiporia cocos (strain MD-104) OX=742152 GN=WOLCODRAFT_83595 PE=4 SV=1	NA	NA
RHS03370	NA	NA	NA	NA	A0A0C3EV68/2e-108/A0A0C3EV68_9AGAM Uncharacterized protein OS=Piloderma croceum F 1598 OX=765440 GN=PILCRDRAFT_830179 PE=4 SV=1	PS50011/10.238/Protein kinase domain profile.	NA
RHS03371	XP_008875489.1/3.99815e-54/hypothetical protein, variant [Aphanomyces invadans] &gt;ETV95739.1 hypothetical protein, variant [Aphanomyces invadans]	Q96RS0/7e-60/TGS1_HUMAN Trimethylguanosine synthase OS=Homo sapiens OX=9606 GN=TGS1 PE=1 SV=3	egr:104423247/4e-53/trimethylguanosine synthase; K14292 trimethylguanosine synthase [EC:2.1.1.-]	Hs19923661/3e-60/[R] KOG2730 Methylase	A0A0C9WU25/4e-155/A0A0C9WU25_9AGAR Unplaced genomic scaffold K443scaffold_55, whole genome shotgun sequence OS=Laccaria amethystina LaAM-08-1 OX=1095629 GN=K443DRAFT_96583 PE=4 SV=1	PF09445/1.6E-26/RNA cap guanine-N2 methyltransferase	biological_process:GO:0001510//RNA methylation;GO:0009452//7-methylguanosine RNA capping;molecular_function:GO:0008168//methyltransferase activity;
RHS05608	XP_005845973.1/1.06807e-36/hypothetical protein CHLNCDRAFT_58353 [Chlorella variabilis] &gt;EFN53871.1 hypothetical protein CHLNCDRAFT_58353 [Chlorella variabilis]	P0CR12/1e-55/MRH4_CRYNJ ATP-dependent RNA helicase MRH4, mitochondrial OS=Cryptococcus neoformans var. neoformans serotype D (strain JEC21 / ATCC MYA-565) OX=214684 GN=MRH4 PE=3 SV=1	bdi:104581299/2e-28/DEAD-box ATP-dependent RNA helicase 52A isoform X2; K11594 ATP-dependent RNA helicase DDX3X [EC:3.6.4.13]	At4g09730/1e-30/[A] KOG0331 ATP-dependent RNA helicase	A0A369JWV7/4e-147/A0A369JWV7_HYPMA ATP-dependent RNA helicase MRH4, mitochondrial OS=Hypsizygus marmoreus OX=39966 GN=MRH4 PE=4 SV=1	PS51194/12.685/Superfamilies 1 and 2 helicase C-terminal domain profile.	molecular_function:GO:0005524//ATP binding;GO:0003676//nucleic acid binding;
RHS05609	ONM02977.1/6.88573e-14/Putative L-ascorbate peroxidase 6 [Zea mays]	D4AUF4/5e-62/WSCD2_ARTBC WSC domain-containing protein ARB_07870 OS=Arthroderma benhamiae (strain ATCC MYA-4681 / CBS 112371) OX=663331 GN=ARB_07870 PE=1 SV=1	cit:102622081/3e-13/structural maintenance of chromosomes protein 3; K00434 L-ascorbate peroxidase [EC:1.11.1.11]	At1g77490/5e-08/[R] TWOG0189 Peroxidase	A8NEV6/1e-150/A8NEV6_COPC7 Peroxidase OS=Coprinopsis cinerea (strain Okayama-7 / 130 / ATCC MYA-4618 / FGSC 9003) OX=240176 GN=CC1G_01201 PE=3 SV=2	PF00141/4.3E-19/Peroxidase	biological_process:GO:0006979//response to oxidative stress;molecular_function:GO:0020037//heme binding;GO:0004601//peroxidase activity;
RHS05610	XP_020888548.1/4.23196e-15/hsp70 nucleotide exchange factor fes1 [Arabidopsis lyrata subsp. lyrata] &gt;EFH58873.1 armadillo/beta-catenin repeat family protein [Arabidopsis lyrata subsp. lyrata]	Q4P7F2/3e-54/FES1_USTMA Hsp70 nucleotide exchange factor FES1 OS=Ustilago maydis (strain 521 / FGSC 9021) OX=237631 GN=FES1 PE=3 SV=2	aly:ARALYDRAFT_478250/8e-16/armadillo/beta-catenin repeat family protein; K09562 hsp70-interacting protein	YBR101c/1e-25/[O] KOG2160 Armadillo/beta-catenin-like repeat-containing protein	A0A0C9YGU3/1e-139/A0A0C9YGU3_9AGAR Unplaced genomic scaffold K443scaffold_3, whole genome shotgun sequence OS=Laccaria amethystina LaAM-08-1 OX=1095629 GN=K443DRAFT_390543 PE=4 SV=1	PF08609/3.9E-24/Nucleotide exchange factor Fes1	NA
RHS05611	AAK54292.1/1.66341e-21/putative helicase [Oryza sativa Japonica Group]	NA	brp:108871281/2e-14/uncharacterized LOC108871281; K15255 ATP-dependent DNA helicase PIF1 [EC:3.6.4.12]	At3g42100/9e-19/[D] KOG0987 DNA helicase PIF1/RRM3	A0A0C9WJA2/1e-34/A0A0C9WJA2_9AGAR Unplaced genomic scaffold K443scaffold_263, whole genome shotgun sequence OS=Laccaria amethystina LaAM-08-1 OX=1095629 GN=K443DRAFT_12190 PE=4 SV=1	NA	NA
RHS07843	XP_016537600.1/1.66076e-11/PREDICTED: putative L-ascorbate peroxidase 6 [Capsicum annuum]	D4AUF4/8e-55/WSCD2_ARTBC WSC domain-containing protein ARB_07870 OS=Arthroderma benhamiae (strain ATCC MYA-4681 / CBS 112371) OX=663331 GN=ARB_07870 PE=1 SV=1	dosa:Os08t0522400-01/1e-09/Os08g0522400; Similar to APX6; L-ascorbate peroxidase/ heme binding / peroxidase.; K00434 L-ascorbate peroxidase [EC:1.11.1.11]	At1g34510/4e-09/[R] TWOG0189 Peroxidase	A8NEV6/2e-134/A8NEV6_COPC7 Peroxidase OS=Coprinopsis cinerea (strain Okayama-7 / 130 / ATCC MYA-4618 / FGSC 9003) OX=240176 GN=CC1G_01201 PE=3 SV=2	PR00458/1.2E-5/Haem peroxidase superfamily signature	biological_process:GO:0006979//response to oxidative stress;molecular_function:GO:0020037//heme binding;GO:0004601//peroxidase activity;
RHS07844	NA	NA	NA	NA	A0A0C9ZSM1/1e-31/A0A0C9ZSM1_9AGAM Unplaced genomic scaffold scaffold_52, whole genome shotgun sequence OS=Pisolithus microcarpus 441 OX=765257 GN=PISMIDRAFT_102055 PE=4 SV=1	NA	NA
RHS07845	NA	NA	NA	NA	A0A0D2LXL3/1e-09/A0A0D2LXL3_9AGAR Uncharacterized protein OS=Hypholoma sublateritium FD-334 SS-4 OX=945553 GN=HYPSUDRAFT_48150 PE=4 SV=1	PF13434/2.5E-5/L-lysine 6-monooxygenase (NADPH-requiring)	NA
RHS07846	GAQ82966.1/8.22149e-74/HEAT repeat-containing protein [Klebsormidium nitens]	Q8C547/5e-140/HTR5B_MOUSE HEAT repeat-containing protein 5B OS=Mus musculus OX=10090 GN=Heatr5b PE=1 SV=3	NA	7298977/9e-111/[S] KOG1822 Uncharacterized conserved protein	A0A0C9WZ31/0.0/A0A0C9WZ31_9AGAR Unplaced genomic scaffold K443scaffold_29, whole genome shotgun sequence OS=Laccaria amethystina LaAM-08-1 OX=1095629 GN=K443DRAFT_675494 PE=4 SV=1	NA	NA
RHS07847	XP_005790745.1/2.06832e-22/hypothetical protein EMIHUDRAFT_55506, partial [Emiliania huxleyi CCMP1516] &gt;EOD38316.1 hypothetical protein EMIHUDRAFT_55506, partial [Emiliania huxleyi CCMP1516]	F1DBA8/9e-09/MPAB_PENBR Mycophenolic acid synthesis protein B OS=Penicillium brevicompactum OX=5074 GN=mpaB PE=3 SV=1	NA	NA	A0A409YNL4/4e-51/A0A409YNL4_9AGAR Uncharacterized protein OS=Panaeolus cyanescens OX=181874 GN=CVT24_011890 PE=4 SV=1	PF09995/2.2E-6/Uncharacterized protein conserved in bacteria (DUF2236)	NA
RHS07848	XP_018825167.1/1.05794e-09/PREDICTED: two-pore potassium channel 1 isoform X1 [Juglans regia] &gt;XP_018825175.1 PREDICTED: two-pore potassium channel 1 isoform X1 [Juglans regia]	P40310/4e-55/TOK1_YEAST Outward-rectifier potassium channel TOK1 OS=Saccharomyces cerevisiae (strain ATCC 204508 / S288c) OX=559292 GN=TOK1 PE=1 SV=1	jre:108994412/2e-10/two-pore potassium channel 1 isoform X1; K05389 potassium channel subfamily K, other eukaryote	YJL093c/2e-55/[P] KOG1418 Tandem pore domain K+ channel	A0A067TF56/0.0/A0A067TF56_GALM3 Uncharacterized protein OS=Galerina marginata (strain CBS 339.88) OX=685588 GN=GALMADRAFT_95343 PE=4 SV=1	PF07885/1.6E-12/Ion channel	cellular_component:GO:0016021//integral component of membrane;molecular_function:GO:0005267//potassium channel activity;GO:0005509//calcium ion binding;
RHS07849	XP_005790745.1/3.93685e-27/hypothetical protein EMIHUDRAFT_55506, partial [Emiliania huxleyi CCMP1516] &gt;EOD38316.1 hypothetical protein EMIHUDRAFT_55506, partial [Emiliania huxleyi CCMP1516]	F1DBA8/8e-24/MPAB_PENBR Mycophenolic acid synthesis protein B OS=Penicillium brevicompactum OX=5074 GN=mpaB PE=3 SV=1	NA	NA	A0A0C3C5Z1/4e-91/A0A0C3C5Z1_HEBCY Uncharacterized protein OS=Hebeloma cylindrosporum h7 OX=686832 GN=M413DRAFT_378573 PE=4 SV=1	PF09995/7.9E-8/Uncharacterized protein conserved in bacteria (DUF2236)	NA
RHS07850	XP_005790745.1/3.29463e-29/hypothetical protein EMIHUDRAFT_55506, partial [Emiliania huxleyi CCMP1516] &gt;EOD38316.1 hypothetical protein EMIHUDRAFT_55506, partial [Emiliania huxleyi CCMP1516]	F1DBA8/6e-19/MPAB_PENBR Mycophenolic acid synthesis protein B OS=Penicillium brevicompactum OX=5074 GN=mpaB PE=3 SV=1	NA	NA	A0A0C3C5Z1/3e-103/A0A0C3C5Z1_HEBCY Uncharacterized protein OS=Hebeloma cylindrosporum h7 OX=686832 GN=M413DRAFT_378573 PE=4 SV=1	NA	NA
RHS07851	XP_022011544.1/0/NADH dehydrogenase [ubiquinone] flavoprotein 1, mitochondrial-like [Helianthus annuus] &gt;OTF94727.1 putative NADH dehydrogenase [ubiquinone] flavoprotein [Helianthus annuus]	P24917/0.0/NDUV1_NEUCR NADH-ubiquinone oxidoreductase 51 kDa subunit, mitochondrial OS=Neurospora crassa (strain ATCC 24698 / 74-OR23-1A / CBS 708.71 / DSM 1257 / FGSC 987) OX=367110 GN=nuo-51 PE=2 SV=2	han:110911254/0.0/NADH dehydrogenase [ubiquinone] flavoprotein 1, mitochondrial-like; K03942 NADH dehydrogenase (ubiquinone) flavoprotein 1 [EC:7.1.1.2 1.6.99.3]	CE02132/0.0/[C] KOG2658 NADH:ubiquinone oxidoreductase, NDUFV1/51kDa subunit	A0A0C3S910/0.0/A0A0C3S910_PHLGI NADH dehydrogenase [ubiquinone] flavoprotein 1, mitochondrial OS=Phlebiopsis gigantea 11061_1 CR5-6 OX=745531 GN=PHLGIDRAFT_29816 PE=3 SV=1	PF01512/1.6E-46/Respiratory-chain NADH dehydrogenase 51 Kd subunit	cellular_component:GO:0005743//mitochondrial inner membrane;GO:0070469//respiratory chain;molecular_function:GO:0046872//metal ion binding;GO:0010181//FMN binding;GO:0051539//4 iron, 4 sulfur cluster binding;GO:0051287//NAD binding;GO:0008137//NADH dehydrogenase (ubiquinone) activity;
RHS07852	ONM07466.1/1.11032e-29/Dual specificity protein phosphatase 1B [Zea mays]	Q9M8K7/5e-28/DUS1B_ARATH Dual specificity protein phosphatase 1B OS=Arabidopsis thaliana OX=3702 GN=DSPTP1B PE=1 SV=1	csat:104744774/9e-28/dual specificity protein phosphatase 1B; K20551 dual specificity protein phosphatase 1B [EC:3.1.3.16 3.1.3.48]	At3g06110/2e-28/[V] KOG1716 Dual specificity phosphatase	A0A0C9WZ17/2e-102/A0A0C9WZ17_9AGAR Unplaced genomic scaffold K443scaffold_142, whole genome shotgun sequence OS=Laccaria amethystina LaAM-08-1 OX=1095629 GN=K443DRAFT_9450 PE=4 SV=1	PS50056/12.578/Tyrosine specific protein phosphatases family profile.	molecular_function:GO:0008138//protein tyrosine/serine/threonine phosphatase activity;
RHS07853	NA	Q10211/4e-132/YAY3_SCHPO Uncharacterized protein C4H3.03c OS=Schizosaccharomyces pombe (strain 972 / ATCC 24843) OX=284812 GN=SPAC4H3.03c PE=4 SV=1	NA	NA	A0A0C9X6P5/0.0/A0A0C9X6P5_9AGAR Unplaced genomic scaffold K443scaffold_170, whole genome shotgun sequence OS=Laccaria amethystina LaAM-08-1 OX=1095629 GN=K443DRAFT_681870 PE=4 SV=1	PF00723/1.0E-48/Glycosyl hydrolases family 15	NA
RHS07854	XP_005646800.1/1.95645e-17/hypothetical protein COCSUDRAFT_55952 [Coccomyxa subellipsoidea C-169] &gt;EIE22256.1 hypothetical protein COCSUDRAFT_55952 [Coccomyxa subellipsoidea C-169]	NA	NA	NA	V2X1Y2/2e-53/V2X1Y2_MONRO 1 concanamycin induced protein c OS=Moniliophthora roreri (strain MCA 2997) OX=1381753 GN=Moror_9885 PE=4 SV=1	PF12585/5.2E-37/Protein of unknown function (DUF3759)	NA
RHS07855	NA	NA	NA	NA	NA	NA	NA
RHS07856	OQR98540.1/1.07992e-34/hypothetical protein THRCLA_06696, partial [Thraustotheca clavata]	O60178/6e-28/NTA1_SCHPO Protein N-terminal amidase OS=Schizosaccharomyces pombe (strain 972 / ATCC 24843) OX=284812 GN=nta1 PE=3 SV=1	gsl:Gasu_49440/3e-11/L-asparaginase isoform 1; K13051 beta-aspartyl-peptidase (threonine type) [EC:3.4.19.5]	SPBC23E6.03c/3e-28/[E] KOG0806 Carbon-nitrogen hydrolase	A0A0C9W192/2e-106/A0A0C9W192_9AGAM Unplaced genomic scaffold scaffold_12, whole genome shotgun sequence OS=Hydnomerulius pinastri MD-312 OX=994086 GN=HYDPIDRAFT_111995 PE=4 SV=1	PS50263/23.212/Carbon-nitrogen hydrolase domain profile.	biological_process:GO:0006807//nitrogen compound metabolic process;molecular_function:GO:0016810//hydrolase activity, acting on carbon-nitrogen (but not peptide) bonds;
RHS07857	XP_008874647.1/0/AMP deaminase [Aphanomyces invadans] &gt;ETV96870.1 AMP deaminase [Aphanomyces invadans]	P50998/0.0/AMPD_SCHPO AMP deaminase OS=Schizosaccharomyces pombe (strain 972 / ATCC 24843) OX=284812 GN=ada1 PE=1 SV=3	bvg:104897993/0.0/AMP deaminase-like; K01490 AMP deaminase [EC:3.5.4.6]	SPBC106.04/0.0/[F] KOG1096 Adenosine monophosphate deaminase	A0A0C9WLN5/0.0/A0A0C9WLN5_9AGAR Unplaced genomic scaffold K443scaffold_650, whole genome shotgun sequence OS=Laccaria amethystina LaAM-08-1 OX=1095629 GN=K443DRAFT_686761 PE=3 SV=1	PF16561/1.4E-17/Glycogen recognition site of AMP-activated protein kinase	biological_process:GO:0032264//IMP salvage;molecular_function:GO:0046872//metal ion binding;GO:0003876//AMP deaminase activity;
RHS07858	GAX78526.1/1.71789e-86/hypothetical protein CEUSTIGMA_g5966.t1 [Chlamydomonas eustigma]	Q5AW69/4e-114/HST21_EMENI NAD-dependent protein deacetylase hst2-1 OS=Emericella nidulans (strain FGSC A4 / ATCC 38163 / CBS 112.46 / NRRL 194 / M139) OX=227321 GN=AN7461 PE=3 SV=1	mis:MICPUN_86067/7e-87/histone deacetylase, SIR2 family; K11412 NAD-dependent deacetylase sirtuin 2 [EC:3.5.1.-]	SPCC132.02/4e-98/[BK] KOG2682 NAD-dependent histone deacetylases and class I sirtuins (SIR2 family)	A0A0C9XKZ1/2e-152/A0A0C9XKZ1_9AGAR NAD-dependent protein deacetylase OS=Laccaria amethystina LaAM-08-1 OX=1095629 GN=K443DRAFT_681985 PE=3 SV=1	PF02146/2.1E-57/Sir2 family	molecular_function:GO:0070403//NAD+ binding;GO:0008270//zinc ion binding;GO:0017136//NAD-dependent histone deacetylase activity;
RHS07859	XP_001762347.1/5.57945e-18/predicted protein [Physcomitrella patens] &gt;EDQ72814.1 predicted protein [Physcomitrella patens]	P39992/8e-34/YEC3_YEAST Uncharacterized protein YEL023C OS=Saccharomyces cerevisiae (strain ATCC 204508 / S288c) OX=559292 GN=YEL023C PE=4 SV=1	NA	NA	A0A409WPJ7/4e-142/A0A409WPJ7_PSICY Uncharacterized protein OS=Psilocybe cyanescens OX=93625 GN=CVT25_001771 PE=4 SV=1	PF09994/4.1E-65/Uncharacterized alpha/beta hydrolase domain (DUF2235)	NA
RHS07860	XP_002504085.1/3.15325e-65/predicted protein [Micromonas commoda] &gt;ACO65343.1 predicted protein [Micromonas commoda]	Q99078/3e-170/FUZ7_USTMA Dual specificity protein kinase FUZ7 OS=Ustilago maydis (strain 521 / FGSC 9021) OX=237631 GN=FUZ7 PE=3 SV=2	smo:SELMODRAFT_450110/7e-61/NQK-1; MAP kinase; K04368 mitogen-activated protein kinase kinase 1 [EC:2.7.12.2]	Hs5579478/1e-104/[T] KOG0581 Mitogen-activated protein kinase kinase (MAP2K)	A0A409WPL5/0.0/A0A409WPL5_PSICY Uncharacterized protein OS=Psilocybe cyanescens OX=93625 GN=CVT25_001766 PE=3 SV=1	PF00069/1.2E-66/Protein kinase domain	biological_process:GO:0023014//signal transduction by protein phosphorylation;GO:0007346//regulation of mitotic cell cycle;GO:0010311//lateral root formation;GO:0032147//activation of protein kinase activity;GO:0007112//male meiosis cytokinesis;GO:0031098//stress-activated protein kinase signaling cascade;cellular_component:GO:0005737//cytoplasm;GO:0009524//phragmoplast;molecular_function:GO:0005…
RHS07861	NA	NA	NA	NA	A0A409WPJ7/3e-113/A0A409WPJ7_PSICY Uncharacterized protein OS=Psilocybe cyanescens OX=93625 GN=CVT25_001771 PE=4 SV=1	PF09994/2.5E-29/Uncharacterized alpha/beta hydrolase domain (DUF2235)	NA
RHS07862	XP_001762347.1/2.25172e-26/predicted protein [Physcomitrella patens] &gt;EDQ72814.1 predicted protein [Physcomitrella patens]	P39992/6e-43/YEC3_YEAST Uncharacterized protein YEL023C OS=Saccharomyces cerevisiae (strain ATCC 204508 / S288c) OX=559292 GN=YEL023C PE=4 SV=1	NA	NA	A0A409WPJ7/0.0/A0A409WPJ7_PSICY Uncharacterized protein OS=Psilocybe cyanescens OX=93625 GN=CVT25_001771 PE=4 SV=1	PF09994/6.4E-85/Uncharacterized alpha/beta hydrolase domain (DUF2235)	NA
RHS07863	XP_009835808.1/3.10335e-58/YjeF family domain-containing protein [Aphanomyces astaci] &gt;ETV74721.1 YjeF family domain-containing protein [Aphanomyces astaci]	Q5KJ55/4e-74/NNRE_CRYNJ NAD(P)H-hydrate epimerase OS=Cryptococcus neoformans var. neoformans serotype D (strain JEC21 / ATCC MYA-565) OX=214684 GN=CND00610 PE=3 SV=1	sind:105157165/7e-55/pyridoxine/pyridoxamine 5'-phosphate oxidase 1, chloroplastic isoform X2; K00275 pyridoxamine 5'-phosphate oxidase [EC:1.4.3.5]; K17759 NAD(P)H-hydrate epimerase [EC:5.1.99.6]	7291119/1e-65/[S] KOG2585 Uncharacterized conserved protein	A0A409Y560/3e-116/A0A409Y560_9AGAR NAD(P)H-hydrate epimerase OS=Gymnopilus dilepis OX=231916 GN=CVT26_003177 PE=3 SV=1	TIGR00197/7.8E-41/yjeF_nterm: YjeF family N-terminal domain	molecular_function:GO:0046872//metal ion binding;GO:0000166//nucleotide binding;GO:0052856//NADHX epimerase activity;
RHS07864	NA	NA	NA	NA	A0A409Y552/1e-70/A0A409Y552_9AGAR Uncharacterized protein OS=Gymnopilus dilepis OX=231916 GN=CVT26_003164 PE=4 SV=1	PF01753/7.5E-9/MYND finger	NA
RHS07865	KHN41679.1/3.117e-44/Putative serine protease EDA2 [Glycine soja]	D4AYS6/3e-120/A1345_ARTBC Probable extracellular serine carboxypeptidase OS=Arthroderma benhamiae (strain ATCC MYA-4681 / CBS 112371) OX=663331 GN=ARB_01345 PE=1 SV=1	egr:104416908/8e-23/lysosomal Pro-X carboxypeptidase; K01285 lysosomal Pro-X carboxypeptidase [EC:3.4.16.2]	7295307/3e-37/[OR] KOG2182 Hydrolytic enzymes of the alpha/beta hydrolase fold	A0A0C3C9H2/0.0/A0A0C3C9H2_HEBCY Uncharacterized protein OS=Hebeloma cylindrosporum h7 OX=686832 GN=M413DRAFT_445651 PE=4 SV=1	PF05577/2.4E-53/Serine carboxypeptidase S28	molecular_function:GO:0008236//serine-type peptidase activity;
RHS07866	NA	NA	NA	NA	NA	PF02146/4.5E-8/Sir2 family	NA
RHS07867	GAQ78534.1/1.49234e-29/hypothetical protein KFL_000140550 [Klebsormidium nitens]	Q3UB74/2e-26/TBRG1_MOUSE Transforming growth factor beta regulator 1 OS=Mus musculus OX=10090 GN=Tbrg1 PE=1 SV=2	cme:CYME_CMQ215C/8e-22/chromodomain helicase DNA binding protein CHD; K14437 chromodomain-helicase-DNA-binding protein 7 [EC:3.6.4.12]	Hs14249500/4e-18/[R] KOG4443 Putative transcription factor HALR/MLL3, involved in embryonic development	A0A369J149/1e-161/A0A369J149_HYPMA Uncharacterized protein OS=Hypsizygus marmoreus OX=39966 GN=Hypma_016380 PE=4 SV=1	PS51543/28.985/FYR domain FYRC motif profile.	cellular_component:GO:0005634//nucleus;
RHS07868	NA	NA	NA	NA	A0A0C9WL08/1e-110/A0A0C9WL08_9AGAR Unplaced genomic scaffold K443scaffold_174, whole genome shotgun sequence OS=Laccaria amethystina LaAM-08-1 OX=1095629 GN=K443DRAFT_681987 PE=4 SV=1	PF00326/4.5E-7/Prolyl oligopeptidase family	NA
RHS07869	GAQ79127.1/5.63936e-62/sulfite oxidase [Klebsormidium nitens]	Q9S850/4e-55/SUOX_ARATH Sulfite oxidase OS=Arabidopsis thaliana OX=3702 GN=SOX PE=1 SV=1	cre:CHLREDRAFT_59800/4e-59/SUOX1; sulfite oxidase; K00387 sulfite oxidase [EC:1.8.3.1]	Hs4557867_2/6e-57/[C] KOG0535 Sulfite oxidase, molybdopterin-binding component	A0A0D2KTF3/0.0/A0A0D2KTF3_9AGAR Uncharacterized protein OS=Hypholoma sublateritium FD-334 SS-4 OX=945553 GN=HYPSUDRAFT_90339 PE=4 SV=1	PR00407/6.3E-35/Eukaryotic molybdopterin domain signature	biological_process:GO:0042128//nitrate assimilation;molecular_function:GO:0043546//molybdopterin cofactor binding;GO:0020037//heme binding;GO:0030151//molybdenum ion binding;GO:0016491//oxidoreductase activity;
RHS07870	NA	NA	NA	NA	A0A0C9XGG2/3e-128/A0A0C9XGG2_9AGAR Unplaced genomic scaffold K443scaffold_176, whole genome shotgun sequence OS=Laccaria amethystina LaAM-08-1 OX=1095629 GN=K443DRAFT_106741 PE=4 SV=1	NA	NA
RHS07871	XP_009821601.1/2.92748e-98/hypothetical protein H257_00561 [Aphanomyces astaci] &gt;ETV89201.1 hypothetical protein H257_00561 [Aphanomyces astaci]	E3LB80/9e-163/EIF3I_PUCGT Eukaryotic translation initiation factor 3 subunit I OS=Puccinia graminis f. sp. tritici (strain CRL 75-36-700-3 / race SCCL) OX=418459 GN=TIF34 PE=3 SV=2	egu:105048617/7e-97/eukaryotic translation initiation factor 3 subunit I; K03246 translation initiation factor 3 subunit I	SPAC4D7.05/7e-132/[JT] KOG0643 Translation initiation factor 3, subunit i (eIF-3i)/TGF-beta receptor-interacting protein (TRIP-1)	A0A369IYB3/0.0/A0A369IYB3_HYPMA Eukaryotic translation initiation factor 3 subunit I OS=Hypsizygus marmoreus OX=39966 GN=TIF34 PE=3 SV=1	PS50082/8.804/Trp-Asp (WD) repeats profile.	biological_process:GO:0006446//regulation of translational initiation;GO:0001731//formation of translation preinitiation complex;cellular_component:GO:0016282//eukaryotic 43S preinitiation complex;GO:0033290//eukaryotic 48S preinitiation complex;GO:0005852//eukaryotic translation initiation factor 3 complex;molecular_function:GO:0003743//translation initiation factor activity;
RHS07872	NA	NA	NA	NA	A0A409WEZ0/2e-126/A0A409WEZ0_PSICY Uncharacterized protein OS=Psilocybe cyanescens OX=93625 GN=CVT25_014897 PE=4 SV=1	NA	NA
RHS07873	NA	NA	NA	NA	A0A067TVQ2/2e-68/A0A067TVQ2_GALM3 Uncharacterized protein OS=Galerina marginata (strain CBS 339.88) OX=685588 GN=GALMADRAFT_238865 PE=4 SV=1	NA	NA
RHS07874	NA	NA	NA	NA	A0A0C9WKY3/0.0/A0A0C9WKY3_9AGAR Unplaced genomic scaffold K443scaffold_176, whole genome shotgun sequence OS=Laccaria amethystina LaAM-08-1 OX=1095629 GN=K443DRAFT_10395 PE=4 SV=1	NA	NA
RHS07875	XP_018812266.1/4.04431e-55/PREDICTED: transcription initiation factor TFIID subunit 6-like [Juglans regia]	O74462/2e-71/TAF6_SCHPO Transcription initiation factor TFIID subunit 6 OS=Schizosaccharomyces pombe (strain 972 / ATCC 24843) OX=284812 GN=taf6 PE=1 SV=1	jre:108984682/8e-56/transcription initiation factor TFIID subunit 6-like; K03131 transcription initiation factor TFIID subunit 6	SPCC16C4.18c/7e-72/[K] KOG2549 Transcription initiation factor TFIID, subunit TAF6 (also component of histone acetyltransferase SAGA)	A0A067TIM8/0.0/A0A067TIM8_GALM3 Uncharacterized protein OS=Galerina marginata (strain CBS 339.88) OX=685588 GN=GALMADRAFT_238878 PE=4 SV=1	PF02969/2.8E-21/TATA box binding protein associated factor (TAF)	biological_process:GO:0051090//regulation of DNA binding transcription factor activity;GO:0006352//DNA-templated transcription, initiation;cellular_component:GO:0005634//nucleus;molecular_function:GO:0003743//translation initiation factor activity;GO:0046982//protein heterodimerization activity;
RHS07876	XP_005756339.1/3.28208e-35/hypothetical protein EMIHUDRAFT_466318 [Emiliania huxleyi CCMP1516] &gt;EOD03910.1 hypothetical protein EMIHUDRAFT_466318 [Emiliania huxleyi CCMP1516]	Q6DKE0/1e-25/DHDH_XENLA Trans-1,2-dihydrobenzene-1,2-diol dehydrogenase OS=Xenopus laevis OX=8355 GN=dhdh PE=2 SV=1	NA	7295964/1e-21/[GQ] KOG2741 Dimeric dihydrodiol dehydrogenase	A0A369JWD4/1e-175/A0A369JWD4_HYPMA D-xylose 1-dehydrogenase (NADP(+)) 2 OS=Hypsizygus marmoreus OX=39966 GN=Hypma_009160 PE=4 SV=1	PF01408/7.0E-10/Oxidoreductase family, NAD-binding Rossmann fold	biological_process:GO:0006281//DNA repair;cellular_component:GO:0030915//Smc5-Smc6 complex;molecular_function:GO:0016491//oxidoreductase activity;
RHS07877	XP_001701554.1/7.35982e-60/predicted protein, partial [Chlamydomonas reinhardtii] &gt;EDO97312.1 predicted protein, partial [Chlamydomonas reinhardtii]	NA	NA	NA	A0A409VQ20/0.0/A0A409VQ20_9AGAR Uncharacterized protein OS=Panaeolus cyanescens OX=181874 GN=CVT24_004809 PE=4 SV=1	NA	NA
RHS07878	NA	NA	NA	NA	A0A369J9Q1/4e-110/A0A369J9Q1_HYPMA Uncharacterized protein OS=Hypsizygus marmoreus OX=39966 GN=Hypma_000906 PE=4 SV=1	NA	NA
RHS07879	NA	NA	NA	NA	A0A0D2NQU6/2e-76/A0A0D2NQU6_9AGAR Uncharacterized protein OS=Hypholoma sublateritium FD-334 SS-4 OX=945553 GN=HYPSUDRAFT_42284 PE=4 SV=1	NA	NA
RHS07880	XP_010656988.1/5.71081e-33/PREDICTED: ribonucleases P/MRP protein subunit POP1 isoform X2 [Vitis vinifera]	Q99575/2e-67/POP1_HUMAN Ribonucleases P/MRP protein subunit POP1 OS=Homo sapiens OX=9606 GN=POP1 PE=1 SV=2	vvi:100249005/1e-33/ribonucleases P/MRP protein subunit POP1; K01164 ribonuclease P/MRP protein subunit POP1 [EC:3.1.26.5]	Hs17467208/1e-67/[A] KOG3322 Ribonucleases P/MRP protein subunit	A0A067TK82/0.0/A0A067TK82_GALM3 Uncharacterized protein OS=Galerina marginata (strain CBS 339.88) OX=685588 GN=GALMADRAFT_238256 PE=4 SV=1	PF06978/1.5E-19/Ribonucleases P/MRP protein subunit POP1	biological_process:GO:0090502//RNA phosphodiester bond hydrolysis, endonucleolytic;GO:0001682//tRNA 5'-leader removal;GO:0008033//tRNA processing;cellular_component:GO:0000172//ribonuclease MRP complex;GO:0005655//nucleolar ribonuclease P complex;molecular_function:GO:0000171//ribonuclease MRP activity;GO:0004526//ribonuclease P activity;
RHS07881	NA	NA	NA	NA	A0A409VPW9/0.0/A0A409VPW9_9AGAR Uncharacterized protein OS=Panaeolus cyanescens OX=181874 GN=CVT24_004806 PE=4 SV=1	PF10444/7.1E-15/Nbl1 / Borealin N terminal	NA
RHS07882	OAE18363.1/1.07641e-45/hypothetical protein AXG93_2727s1290 [Marchantia polymorpha subsp. ruderalis]	P53199/1e-60/ERG26_YEAST Sterol-4-alpha-carboxylate 3-dehydrogenase, decarboxylating OS=Saccharomyces cerevisiae (strain ATCC 204508 / S288c) OX=559292 GN=ERG26 PE=1 SV=1	jcu:105638060/4e-46/3beta-hydroxysteroid- dehydrogenase/decarboxylase; K07748 sterol-4alpha-carboxylate 3-dehydrogenase (decarboxylating) [EC:1.1.1.170]	YGL001c/4e-61/[IE] KOG1430 C-3 sterol dehydrogenase/3-beta-hydroxysteroid dehydrogenase and related dehydrogenases	A0A0C9YIT7/0.0/A0A0C9YIT7_9AGAR Unplaced genomic scaffold K443scaffold_9, whole genome shotgun sequence OS=Laccaria amethystina LaAM-08-1 OX=1095629 GN=K443DRAFT_605271 PE=4 SV=1	PF01073/2.6E-61/3-beta hydroxysteroid dehydrogenase/isomerase family	biological_process:GO:0006694//steroid biosynthetic process;cellular_component:GO:0016021//integral component of membrane;GO:0005789//endoplasmic reticulum membrane;molecular_function:GO:0003854//3-beta-hydroxy-delta5-steroid dehydrogenase activity;
RHS07883	OLP83209.1/6.45842e-46/Cell division cycle protein 123-like [Symbiodinium microadriaticum]	Q9P7N5/9e-56/CD123_SCHPO Cell division cycle protein 123 OS=Schizosaccharomyces pombe (strain 972 / ATCC 24843) OX=284812 GN=cdc123 PE=1 SV=1	NA	SPAP27G11.03/4e-56/[S] KOG2983 Uncharacterized conserved protein	A0A369J7B1/2e-154/A0A369J7B1_HYPMA Uncharacterized protein OS=Hypsizygus marmoreus OX=39966 GN=Hypma_000901 PE=4 SV=1	PF07065/6.7E-99/D123	biological_process:GO:0007049//cell cycle;
RHS07884	OSX80488.1/2.47876e-89/hypothetical protein BU14_0051s0008 [Porphyra umbilicalis]	Q9Y8H5/4e-104/FAD12_MORAP Delta(12) fatty acid desaturase OS=Mortierella alpina OX=64518 PE=1 SV=2	ccp:CHC_T00008296001/8e-82/delta12 fatty acid desaturase; K10256 omega-6 fatty acid desaturase / acyl-lipid omega-6 desaturase (Delta-12 desaturase) [EC:1.14.19.6 1.14.19.22]	At3g12120/8e-65/[I] TWOG0155 Oleate desaturase/linoleate desaturase	B0CVT9/0.0/B0CVT9_LACBS Delta-12 fatty acid desaturase protein OS=Laccaria bicolor (strain S238N-H82 / ATCC MYA-4686) OX=486041 GN=FAD12-5 PE=4 SV=1	PS50011/19.326/Protein kinase domain profile.	biological_process:GO:0006629//lipid metabolic process;cellular_component:GO:0016021//integral component of membrane;molecular_function:GO:0045485//omega-6 fatty acid desaturase activity;GO:0016717//oxidoreductase activity, acting on paired donors, with oxidation of a pair of donors resulting in the reduction of molecular oxygen to two molecules of water;
RHS07885	BAK02798.1/1.45438e-77/predicted protein [Hordeum vulgare subsp. vulgare]	P87208/3e-170/PDC_EMENI Pyruvate decarboxylase OS=Emericella nidulans (strain FGSC A4 / ATCC 38163 / CBS 112.46 / NRRL 194 / M139) OX=227321 GN=pdcA PE=3 SV=3	egr:104440922/3e-78/pyruvate decarboxylase 1; K01568 pyruvate decarboxylase [EC:4.1.1.1]	SPAC3G9.11c/7e-176/[EH] KOG1184 Thiamine pyrophosphate-requiring enzyme	A0A0C9YCC9/0.0/A0A0C9YCC9_9AGAR Unplaced genomic scaffold K443scaffold_9, whole genome shotgun sequence OS=Laccaria amethystina LaAM-08-1 OX=1095629 GN=K443DRAFT_128744 PE=3 SV=1	PF02775/7.8E-13/Thiamine pyrophosphate enzyme, C-terminal TPP binding domain	molecular_function:GO:0000287//magnesium ion binding;GO:0016831//carboxy-lyase activity;GO:0030976//thiamine pyrophosphate binding;
RHS07886	KUF79420.1/7.05363e-165/Peptidase M3 family [Phytophthora nicotianae]	Q8C1A5/8e-173/THOP1_MOUSE Thimet oligopeptidase OS=Mus musculus OX=10090 GN=Thop1 PE=1 SV=1	ppp:112295983/2e-141/thimet oligopeptidase-like; K01392 thimet oligopeptidase [EC:3.4.24.15]	Hs4507491/2e-168/[O] KOG2089 Metalloendopeptidase family - saccharolysin & thimet oligopeptidase	A0A0C9YIU4/0.0/A0A0C9YIU4_9AGAR Unplaced genomic scaffold K443scaffold_9, whole genome shotgun sequence OS=Laccaria amethystina LaAM-08-1 OX=1095629 GN=K443DRAFT_85981 PE=3 SV=1	PF01432/4.9E-133/Peptidase family M3	molecular_function:GO:0046872//metal ion binding;GO:0004222//metalloendopeptidase activity;
RHS07887	XP_010548996.1/6.26214e-12/PREDICTED: universal stress protein PHOS34 [Tarenaya hassleriana]	P87132/2e-32/YFK5_SCHPO Uncharacterized protein C167.05 OS=Schizosaccharomyces pombe (strain 972 / ATCC 24843) OX=284812 GN=SPAC167.05 PE=1 SV=2	NA	SPAC167.05/2e-22/[T] TWOG0093 FOG: USPA domain	A0A409YB22/0.0/A0A409YB22_9AGAR Uncharacterized protein OS=Panaeolus cyanescens OX=181874 GN=CVT24_004905 PE=4 SV=1	PF00582/2.6E-21/Universal stress protein family	NA
RHS07888	XP_005538509.1/1.74918e-56/probable mitochondrial mRNA processing protein PET127 [Cyanidioschyzon merolae strain 10D] &gt;BAM82473.1 probable mitochondrial mRNA processing protein PET127 [Cyanidioschyzon merolae strain 10D]	O74832/1e-66/PT127_SCHPO mRNA degradation protein pet127, mitochondrial OS=Schizosaccharomyces pombe (strain 972 / ATCC 24843) OX=284812 GN=pet127 PE=3 SV=1	NA	NA	A0A0C9X712/0.0/A0A0C9X712_9AGAR Unplaced genomic scaffold K443scaffold_9, whole genome shotgun sequence OS=Laccaria amethystina LaAM-08-1 OX=1095629 GN=K443DRAFT_672847 PE=4 SV=1	PF08634/2.7E-101/Mitochondrial protein Pet127	biological_process:GO:0000959//mitochondrial RNA metabolic process;cellular_component:GO:0005739//mitochondrion;
RHS07889	XP_010314944.1/1.37245e-58/PREDICTED: ADP-ribosylation factor-like protein 8B, partial [Solanum lycopersicum]	Q8VEH3/9e-61/ARL8A_MOUSE ADP-ribosylation factor-like protein 8A OS=Mus musculus OX=10090 GN=Arl8a PE=1 SV=1	sly:101260414/3e-59/ADP-ribosylation factor-like protein 8B; K07955 ADP-ribosylation factor-like protein 8	Hs20270343/9e-61/[R] KOG0075 GTP-binding ADP-ribosylation factor-like protein	A0A409XFZ1/9e-94/A0A409XFZ1_PSICY Uncharacterized protein OS=Psilocybe cyanescens OX=93625 GN=CVT25_013861 PE=3 SV=1	PR00449/1.0E-8/Transforming protein P21 ras signature	biological_process:GO:0007264//small GTPase mediated signal transduction;cellular_component:GO:0005622//intracellular;molecular_function:GO:0016787//hydrolase activity;GO:0005525//GTP binding;
RHS07890	XP_006451772.1/3.0081e-07/hypothetical protein CICLE_v10009269mg [Citrus clementina] &gt;XP_006464813.1 PREDICTED: E3 SUMO-protein ligase MMS21 [Citrus sinensis] &gt;ESR65012.1 hypothetical protein CICLE_v10009269mg [Citrus clementina] &gt;KDO49254.1 hypothetical protein CISIN_1g025405mg [Citrus sinensis]	Q4PIR3/4e-12/NSE2_SCHPO E3 SUMO-protein ligase nse2 OS=Schizosaccharomyces pombe (strain 972 / ATCC 24843) OX=284812 GN=nse2 PE=1 SV=3	cit:102618942/6e-08/E3 SUMO-protein ligase MMS21; K22756 E3 SUMO-protein ligase NSE2 [EC:2.3.2.-]	SPAC16A10.06c/8e-11/[R] KOG2979 Protein involved in DNA repair	A0A0C9Y2D1/1e-98/A0A0C9Y2D1_9AGAR Unplaced genomic scaffold K443scaffold_9, whole genome shotgun sequence OS=Laccaria amethystina LaAM-08-1 OX=1095629 GN=K443DRAFT_119320 PE=4 SV=1	PF11789/3.3E-12/Zinc-finger of the MIZ type in Nse subunit	biological_process:GO:0000724//double-strand break repair via homologous recombination;cellular_component:GO:0030915//Smc5-Smc6 complex;molecular_function:GO:0008270//zinc ion binding;GO:0019789//SUMO transferase activity;
RHS07891	AIR75511.1/5.5348e-51/ribosomal protein S12 (chloroplast) [Cyclotella sp. L04_2] &gt;AIR75652.1 ribosomal protein S12 (chloroplast) [Cyclotella sp. WC03_2]	A0T0Z8/5e-51/RR12_THAPS 30S ribosomal protein S12, chloroplastic OS=Thalassiosira pseudonana OX=35128 GN=rps12 PE=3 SV=1	ppp:2546797/4e-46/rps12, PhpapaCp001; ribosomal protein S12; K02950 small subunit ribosomal protein S12	AtCh002/1e-45/[J] KOG1750 Mitochondrial/chloroplast ribosomal protein S12	A0A0D2PX91/1e-72/A0A0D2PX91_9AGAR Uncharacterized protein OS=Hypholoma sublateritium FD-334 SS-4 OX=945553 GN=HYPSUDRAFT_136883 PE=3 SV=1	TIGR00981/1.6E-56/rpsL_bact: ribosomal protein uS12	biological_process:GO:0006412//translation;cellular_component:GO:0015935//small ribosomal subunit;GO:0009507//chloroplast;molecular_function:GO:0003735//structural constituent of ribosome;GO:0019843//rRNA binding;
RHS07892	NA	O13992/3e-25/MUG56_SCHPO Meiotically up-regulated gene 56 protein OS=Schizosaccharomyces pombe (strain 972 / ATCC 24843) OX=284812 GN=mug56 PE=1 SV=1	NA	NA	A0A409VHZ4/0.0/A0A409VHZ4_9AGAR Uncharacterized protein OS=Gymnopilus dilepis OX=231916 GN=CVT26_000794 PE=4 SV=1	PF15404/3.5E-18/Pleckstrin homology domain	NA
RHS07893	OUS47636.1/5.18975e-80/alternative oxidase-domain-containing protein [Ostreococcus tauri]	Q8NKE2/2e-112/AOX_CRYNH Alternative oxidase, mitochondrial OS=Cryptococcus neoformans var. grubii serotype A (strain H99 / ATCC 208821 / CBS 10515 / FGSC 9487) OX=235443 GN=AOX1 PE=3 SV=2	csl:COCSUDRAFT_64793/2e-67/threonyl-tRNA synthetase; K01868 threonyl-tRNA synthetase [EC:6.1.1.3]	NA	A0A0C9Y2D8/0.0/A0A0C9Y2D8_9AGAR Alternative oxidase OS=Laccaria amethystina LaAM-08-1 OX=1095629 GN=K443DRAFT_86210 PE=3 SV=1	PF01786/5.3E-87/Alternative oxidase	cellular_component:GO:0016021//integral component of membrane;GO:0070469//respiratory chain;molecular_function:GO:0102721//ubiquinol:oxygen oxidoreductase activity;GO:0046872//metal ion binding;GO:0009916//alternative oxidase activity;
RHS07894	XP_008867836.1/1.29829e-15/hypothetical protein H310_05011 [Aphanomyces invadans] &gt;ETW03607.1 hypothetical protein H310_05011 [Aphanomyces invadans]	Q17RP2/6e-08/TIGD6_HUMAN Tigger transposable element-derived protein 6 OS=Homo sapiens OX=9606 GN=TIGD6 PE=2 SV=2	NA	Hs13569924/3e-08/[BD] KOG3105 DNA-binding centromere protein B (CENP-B)	A0A369JBW0/2e-100/A0A369JBW0_HYPMA Uncharacterized protein OS=Hypsizygus marmoreus OX=39966 GN=Hypma_000880 PE=4 SV=1	PS51253/12.782/CENPB-type HTH domain profile.	molecular_function:GO:0003677//DNA binding;
RHS07895	NA	NA	NA	NA	A0A0C3CIE0/0.0/A0A0C3CIE0_HEBCY Uncharacterized protein OS=Hebeloma cylindrosporum h7 OX=686832 GN=M413DRAFT_403216 PE=4 SV=1	NA	NA
RHS07896	NA	O13813/1e-15/TOM22_SCHPO Mitochondrial import receptor subunit tom22 OS=Schizosaccharomyces pombe (strain 972 / ATCC 24843) OX=284812 GN=tom22 PE=3 SV=1	NA	SPAC17H9.16/4e-16/[U] KOG4111 Translocase of outer mitochondrial membrane complex, subunit TOM22	A0A137QLU6/1e-66/A0A137QLU6_9AGAR Mitochondrial import receptor subunit tom22 OS=Leucoagaricus sp. SymC.cos OX=1714833 GN=AN958_07666 PE=4 SV=1	PF04281/3.6E-37/Mitochondrial import receptor subunit Tom22	NA
RHS07897	BAK03101.1/2.37246e-66/predicted protein [Hordeum vulgare subsp. vulgare] &gt;EWZ01548.1 NADH-ubiquinone oxidoreductase 40 kDa subunit, mitochondrial [Fusarium oxysporum FOSC 3-a]	P25284/7e-80/NDUA9_NEUCR NADH-ubiquinone oxidoreductase 40 kDa subunit, mitochondrial OS=Neurospora crassa (strain ATCC 24698 / 74-OR23-1A / CBS 708.71 / DSM 1257 / FGSC 987) OX=367110 GN=nuo40 PE=1 SV=2	mus:103980595/2e-59/NADH dehydrogenase [ubiquinone] 1 alpha subcomplex subunit 9, mitochondrial; K03953 NADH dehydrogenase (ubiquinone) 1 alpha subcomplex subunit 9	Hs6681764/3e-63/[C] KOG2865 NADH:ubiquinone oxidoreductase, NDUFA9/39kDa subunit	A0A409XFT6/0.0/A0A409XFT6_PSICY Uncharacterized protein OS=Psilocybe cyanescens OX=93625 GN=CVT25_013826 PE=4 SV=1	PF05368/8.4E-11/NmrA-like family	NA
RHS07898	XP_020585727.1/8.1946e-22/something about silencing protein 10 [Phalaenopsis equestris] &gt;XP_020585728.1 something about silencing protein 10 [Phalaenopsis equestris] &gt;XP_020585729.1 something about silencing protein 10 [Phalaenopsis equestris] &gt;XP_020585730.1 something about silencing protein 10 [Phalaenopsis equestris]	Q1MTS0/4e-45/YBH9_SCHPO Uncharacterized protein C3B8.09 OS=Schizosaccharomyces pombe (strain 972 / ATCC 24843) OX=284812 GN=SPBC3B8.09 PE=1 SV=1	peq:110028285/2e-22/something about silencing protein 10; K14767 U3 small nucleolar RNA-associated protein 3	SPBC3B8.09/2e-45/[B] KOG3118 Disrupter of silencing SAS10	A0A067THS8/0.0/A0A067THS8_GALM3 Uncharacterized protein OS=Galerina marginata (strain CBS 339.88) OX=685588 GN=GALMADRAFT_238215 PE=4 SV=1	PF09368/5.1E-24/Sas10 C-terminal domain	NA
RHS07899	EMT33656.1/1.27328e-19/hypothetical protein F775_31702 [Aegilops tauschii]	Q5QJE6/6e-20/TDIF2_HUMAN Deoxynucleotidyltransferase terminal-interacting protein 2 OS=Homo sapiens OX=9606 GN=DNTTIP2 PE=1 SV=2	NA	SPAC3G9.15c/6e-19/[S] KOG3100 Uncharacterized conserved protein	A0A409XFS2/4e-119/A0A409XFS2_PSICY Uncharacterized protein (Fragment) OS=Psilocybe cyanescens OX=93625 GN=CVT25_013820 PE=4 SV=1	PF08698/9.1E-29/Fcf2 pre-rRNA processing	NA
RHS07900	OTG24587.1/7.13449e-86/putative 2-methoxy-6-polyprenyl-1,4-benzoquinol methylase [Helianthus annuus]	P87230/3e-103/COQ5_SCHPO 2-methoxy-6-polyprenyl-1,4-benzoquinol methylase, mitochondrial OS=Schizosaccharomyces pombe (strain 972 / ATCC 24843) OX=284812 GN=coq5 PE=3 SV=1	han:110940315/2e-86/2-methoxy-6-polyprenyl-1,4-benzoquinol methylase, mitochondrial-like; K06127 2-methoxy-6-polyprenyl-1,4-benzoquinol methylase [EC:2.1.1.201]	SPCC4G3.04c/2e-103/[H] KOG1540 Ubiquinone biosynthesis methyltransferase COQ5	A0A166W996/4e-174/A0A166W996_9AGAM 2-methoxy-6-polyprenyl-1,4-benzoquinol methylase, mitochondrial OS=Fibularhizoctonia sp. CBS 109695 OX=436010 GN=COQ5 PE=3 SV=1	PF01209/1.6E-81/ubiE/COQ5 methyltransferase family	biological_process:GO:0006744//ubiquinone biosynthetic process;cellular_component:GO:0031314//extrinsic component of mitochondrial inner membrane;molecular_function:GO:0102005//2-octaprenyl-6-methoxy-1,4-benzoquinone methylase activity;GO:0008425//2-polyprenyl-6-methoxy-1,4-benzoquinone methyltransferase activity;
RHS07901	GAQ81633.1/1.48916e-127/cullin 3 [Klebsormidium nitens]	O60999/0.0/CUL1_DICDI Cullin-1 OS=Dictyostelium discoideum OX=44689 GN=culA PE=1 SV=1	han:110911360/6e-123/cullin-3A-like; K03869 cullin 3	Hs4503161/0.0/[D] KOG2166 Cullins	A0A369J7Z8/0.0/A0A369J7Z8_HYPMA Cullin-1 OS=Hypsizygus marmoreus OX=39966 GN=culA_1 PE=3 SV=1	PS50069/56.14/Cullin family profile.	NA
RHS07902	NA	NA	NA	NA	A0A0D2MK60/2e-67/A0A0D2MK60_9AGAR Uncharacterized protein OS=Hypholoma sublateritium FD-334 SS-4 OX=945553 GN=HYPSUDRAFT_39222 PE=4 SV=1	NA	NA
RHS07903	NA	NA	NA	YLL002w/1e-06/[S] KOG4534 Uncharacterized conserved protein	V2YTN4/9e-131/V2YTN4_MONRO Duf1714 domain-containing protein OS=Moniliophthora roreri (strain MCA 2997) OX=1381753 GN=Moror_13934 PE=4 SV=1	PF08214/9.6E-27/Histone acetylation protein	NA
RHS07904	NA	NA	NA	NA	A0A401GM02/4e-12/A0A401GM02_9APHY Uncharacterized protein OS=Sparassis crispa OX=139825 GN=SCP_0502470 PE=4 SV=1	NA	NA
RHS07905	NA	NA	NA	NA	A0A0C9YIX7/5e-55/A0A0C9YIX7_9AGAR Unplaced genomic scaffold K443scaffold_9, whole genome shotgun sequence OS=Laccaria amethystina LaAM-08-1 OX=1095629 GN=K443DRAFT_128765 PE=4 SV=1	NA	NA
RHS07906	NA	NA	NA	NA	A0A2R6NHR6/3e-08/A0A2R6NHR6_9APHY Uncharacterized protein OS=Phlebia centrifuga OX=98765 GN=PHLCEN_2v12147 PE=4 SV=1	NA	NA
RHS07907	XP_005706195.1/6.06586e-52/glutathione S-transferase [Galdieria sulphuraria] &gt;EME29675.1 glutathione S-transferase [Galdieria sulphuraria]	Q54UR0/1e-25/Y0881_DICDI Glutathione S-transferase domain-containing protein DDB_G0280881 OS=Dictyostelium discoideum OX=44689 GN=DDB_G0280881 PE=3 SV=1	gsl:Gasu_28980/1e-52/glutathione S-transferase; K00799 glutathione S-transferase [EC:2.5.1.18]	YNL229c/3e-22/[O] KOG0867 Glutathione S-transferase	A0A409XGC3/8e-96/A0A409XGC3_PSICY Uncharacterized protein OS=Psilocybe cyanescens OX=93625 GN=CVT25_013864 PE=3 SV=1	PS50405/16.703/Soluble glutathione S-transferase C-terminal domain profile.	molecular_function:GO:0004364//glutathione transferase activity;GO:0016740//transferase activity;
RHS07908	NA	NA	NA	NA	A0A067THJ8/5e-72/A0A067THJ8_GALM3 Uncharacterized protein OS=Galerina marginata (strain CBS 339.88) OX=685588 GN=GALMADRAFT_220697 PE=4 SV=1	PF12824/6.8E-22/Mitochondrial ribosomal protein subunit L20	NA
RHS07909	BAJ94832.1/3.39382e-175/predicted protein [Hordeum vulgare subsp. vulgare]	Q6TU48/9e-153/MAOX_DICDI NADP-dependent malic enzyme OS=Dictyostelium discoideum OX=44689 GN=malA PE=2 SV=1	jcu:105637856/2e-140/NADP-dependent malic enzyme; K00029 malate dehydrogenase (oxaloacetate-decarboxylating)(NADP+) [EC:1.1.1.40]	At5g25880/3e-139/[C] KOG1257 NADP+-dependent malic enzyme	A0A067TS06/0.0/A0A067TS06_GALM3 Malic enzyme OS=Galerina marginata (strain CBS 339.88) OX=685588 GN=GALMADRAFT_841399 PE=3 SV=1	PR00072/2.9E-58/Malic enzyme signature	molecular_function:GO:0004471//malate dehydrogenase (decarboxylating) (NAD+) activity;GO:0046872//metal ion binding;GO:0051287//NAD binding;
RHS07910	XP_002185744.1/1.22545e-24/predicted protein, partial [Phaeodactylum tricornutum CCAP 1055/1] &gt;ACI65214.1 predicted protein, partial [Phaeodactylum tricornutum CCAP 1055/1]	Q9Y7Q6/3e-29/SET7_SCHPO SET domain-containing protein 7 OS=Schizosaccharomyces pombe (strain 972 / ATCC 24843) OX=284812 GN=set7 PE=1 SV=1	ppp:112282662/1e-13/probable inactive tRNA-specific adenosine deaminase-like protein 3 isoform X1; K15442 tRNA-specific adenosine deaminase 3	Hs19923945/5e-12/[A] KOG2771 Subunit of tRNA-specific adenosine-34 deaminase	A0A409VMQ6/0.0/A0A409VMQ6_9AGAR Uncharacterized protein OS=Gymnopilus dilepis OX=231916 GN=CVT26_006841 PE=4 SV=1	PF00856/1.0E-5/SET domain	molecular_function:GO:0003824//catalytic activity;
RHS07911	OWZ17878.1/4.89259e-79/UDP-N-acetylglucosamine-dolichyl-phosphate N-acetylglucosaminephosphotransferase [Phytophthora megakarya]	Q5EA65/4e-109/GPT_BOVIN UDP-N-acetylglucosamine--dolichyl-phosphate N-acetylglucosaminephosphotransferase OS=Bos taurus OX=9913 GN=DPAGT1 PE=2 SV=1	dcr:108222101/1e-76/UDP-N-acetylglucosamine--dolichyl-phosphate N-acetylglucosaminephosphotransferase-like isoform X1; K01001 UDP-N-acetylglucosamine--dolichyl-phosphate N-acetylglucosaminephosphotransferase [EC:2.7.8.15]	YBR243c/2e-109/[G] KOG2788 Glycosyltransferase	A0A369J748/0.0/A0A369J748_HYPMA UDP-N-acetylglucosamine--dolichyl-phosphate N-acetylglucosaminephosphotransferase OS=Hypsizygus marmoreus OX=39966 GN=DPAGT1 PE=4 SV=1	PF00953/2.1E-30/Glycosyl transferase family 4	biological_process:GO:0006487//protein N-linked glycosylation;GO:0006488//dolichol-linked oligosaccharide biosynthetic process;cellular_component:GO:0016021//integral component of membrane;molecular_function:GO:0003975//UDP-N-acetylglucosamine-dolichyl-phosphate N-acetylglucosaminephosphotransferase activity;GO:0008963//phospho-N-acetylmuramoyl-pentapeptide-transferase activity;
RHS07912	XP_011081428.1/0/pre-mRNA-processing-splicing factor 8A [Sesamum indicum]	Q99PV0/0.0/PRP8_MOUSE Pre-mRNA-processing-splicing factor 8 OS=Mus musculus OX=10090 GN=Prpf8 PE=1 SV=2	sind:105164478/0.0/pre-mRNA-processing-splicing factor 8A; K12856 pre-mRNA-processing factor 8	Hs17999537/0.0/[A] KOG1795 U5 snRNP spliceosome subunit	A0A0C9X758/0.0/A0A0C9X758_9AGAR Unplaced genomic scaffold K443scaffold_9, whole genome shotgun sequence OS=Laccaria amethystina LaAM-08-1 OX=1095629 GN=K443DRAFT_672880 PE=4 SV=1	PF00463/2.4E-252/Isocitrate lyase family	biological_process:GO:0000398//mRNA splicing, via spliceosome;cellular_component:GO:0005681//spliceosomal complex;molecular_function:GO:0017070//U6 snRNA binding;GO:0030623//U5 snRNA binding;
RHS07913	NA	NA	NA	NA	A0A067TUP0/0.0/A0A067TUP0_GALM3 Uncharacterized protein (Fragment) OS=Galerina marginata (strain CBS 339.88) OX=685588 GN=GALMADRAFT_46409 PE=4 SV=1	PS50003/7.604/PH domain profile.	NA
RHS07914	NA	NA	NA	NA	A0A409VMR9/1e-104/A0A409VMR9_9AGAR Uncharacterized protein OS=Gymnopilus dilepis OX=231916 GN=CVT26_006840 PE=4 SV=1	NA	NA
RHS07915	NA	NA	NA	NA	A0A0C9YIY8/8e-140/A0A0C9YIY8_9AGAR Unplaced genomic scaffold K443scaffold_9, whole genome shotgun sequence OS=Laccaria amethystina LaAM-08-1 OX=1095629 GN=K443DRAFT_128775 PE=4 SV=1	NA	NA
[truncated: 7,557 more rows]

## Sheet: Supplemental Table 6
Supplemental Table 6 Comparative analysis of Carbohydrate-active enzymes between Floccularia luteovirens and Agaricus bisporus
Class	Num (#)		Class	Num (#)		Class	Num (#)		Class	Num (#)		Class	Num (#)		Class	Num (#)
	F	A		F	A		F	A		F	A		F	A		F	A
GTs	87	72	PLs	6	2	CEs	82	79	GHs	137	118	CBMs	28	31	AAs	60	38
GT1	4	2	PL1_3	1	0	CE1	15	9	GH105	6	5	CBM1	2	2	AA12	2	1
GT15	2	3	PL11	1	0	CE10	25	30	GH109	7	6	CBM12	1	1	AA14	2	2
GT17	0	1	PL15	2	0	CE12	1	2	GH115	3	2	CBM13	11	20	AA2	13	5
GT18	1	1	PL17_2	1	0	CE14	1	1	GH119	2	0	CBM17	1	0	AA3	2	1
GT2	2	0	PL8_1	1	0	CE16	8	9	GH12	2	2	CBM19	2	1	AA3_1	4	1
[truncated: 51 more rows]

[truncated: 2 more sheets: Supplemental Table 7, Supplemental Table 8]
